# Supplementary material for: Discovery of Cancer Driver Long Noncoding RNAs across 1112 Tumour Genomes: New Candidates and Distinguishing Features
Source: PubMed Central journal article supplement (PMC5269722; doi:10.1038/srep41544), 2017-01-27

## **Discovery of Cancer Driver Long Noncoding RNAs across 1112 Tumour Genomes: New Candidates and Distinguishing Features.**

### **Authors**

Andrés Lanzós<sup>1,2,3</sup>, Joana Carlevaro-Fita<sup>1,2,3</sup>, Loris Mularoni<sup>4</sup>, Ferran Reverter<sup>1,2,3</sup>, Emilio Palumbo<sup>1,2,3</sup>, Roderic Guigó<sup>1,2,3</sup>, Rory Johnson<sup>1,2,3,5\*</sup>

1. Centre for Genomic Regulation (CRG), The Barcelona Institute of Science and Technology, Dr. Aiguader 88, Barcelona 08003, Spain

2. Universitat Pompeu Fabra (UPF), Barcelona, Spain.

3. Institut Hospital del Mar d'Investigacions Mèdiques (IMIM), 08003 Barcelona, Spain.

4. Research Unit on Biomedical Informatics, Department of Experimental and Health Sciences, Universitat Pompeu Fabra, Dr. Aiguader 88, Barcelona, Spain

5. Present address: Department of Clinical Research, University of Bern, Murtenstrasse 35, 3010 Bern, Switzerland.

\* Correspondence to rory.johnson@dkf.unibe.ch

### **Supplementary Figure Legends**

Supplementary Figure S1: Graphical representation of the ExInAator workflow. The objective of this algorithm is the creation of a local background region with identical trinucleotide content to the exons of a given gene. As an example we take a hypothetical single-exon lncRNA gene. (A) Upstream and downstream regions within the window size are defined as background regions. All the trinucleotides in the exon region are counted. The mutations (indicated by \*) in the central nucleotide positions of each trinucleotide are counted. Colours indicate the four nucleotides in the exon. Background region nucleotides are not coloured. For brevity, only four trinucleotide combinations are shown. (B) Next, an iterative sampling is performed. A set of trinucleotides, identical to the exonic trinucleotide set, are randomly sampled from the background region. This operation is repeated, without replacement of the central nucleotide (red "X"), until it is no longer possible to extract the appropriate set of trinucleotides. (C) The total number of nucleotide positions and mutations are counted for the exon region and the sampled background region. These values are used for the contingency table analysis shown in Figure 1.

Supplementary Figure S2: Ratio of exonic to background mutation density.

Supplementary Figure S3: Quantile-quantile ("QQ") plots for all analyses. Grey dots represent the P values obtained in the two simulations. The black and coloured dots correspond to the P values calculated in the real dataset.

Supplementary Figure S4: Histogram of predicted candidates in Breast across the 100 iterations of shuffling analysis. First, all lncRNAs randomly placed in a new position within the whole genome, while maintaining exon-intron structure. Then ExInAator was run, with same settings as described, using real mutations from Breast. Shown are the number of predicted candidates at a cutoff of FDR<0.1. The number of predicted candidates using real gene locations is 3, greater than 97% of simulations.

Supplementary Figure S5: Quantile-quantile (“QQ”) plot of “intronic gene” simulation in Breast. Artificial “intronic” gene models were constructed, where the exons of every gene were replaced by equally-sized, randomly-selected fragments of introns from the same gene. These genes were used as the input for ExInAator and run (with same settings as for real data) on Breast samples.

Supplementary Figure S6: Expression of SAMMSON in Stomach (in which is detected by ExInAator), and skin, sun-exposed or not (in which has been previously implicated in Melanoma).

Supplementary Figure S7: Exon-level mutational density of all lncRNAs candidates against the background regions.

Supplementary Figure S8: Intersection between ExInAator, MiTranscriptome and Du et al candidates.

Supplementary Figure S9: Performance of ExInAator compared MutSig, OncodriveFM and OncodriveClust in the Pancancer Alexandrov dataset. (A) Percentage of CGC candidates amongst predicted drivers for each method across different cutoffs ( $-\log_{10} Q$  value) in all the Alexandrov cancer files. (B) As for (A), but displayed by ranked number of top predicted drivers.

Supplementary Figure S10: The overlap of predicted protein-coding drivers between methods. The percent of predicted drivers of each method on Pancancer Alexander mutations that are also predicted by at least one of the other methods displayed by (A) cutoff or by (B) ranked number of candidates.

Supplementary Figure S11: QQ plots of each method on the Pancancer Alexandrov dataset. Grey dots represent the P values obtained in a simulation. The black and coloured dots correspond to the P values calculated in the real dataset.

Supplementary Figure S12: Tumour specificity of lncRNA and protein coding genes. The figure shows the percent of genes of each biotype that are mutated in one or more distinct tumour samples.

Supplementary Figure S13: Screenshots of the 12 candidate’s mutations analysed with IGV.

Supplementary Figure S14: Replication timing of cancer lncRNAs, ExInAator predictions and other lncRNAs. Cumulative distribution are shown for S50 values in HeLa cells assigned to lncRNA gene sets. S50 ratio is defined as the fraction of the S phase at which 50% of the DNA is replicated (see Materials and Methods). Low ratios indicate early replication timing. Genes are grouped by: literature-reported cancer CRL lncRNAs; all ExInAator candidates (both CRL and not); non-CRL novel ExInAator candidates; non-CRL non-candidates, being all other GENCODE lincRNAs. Candidates here were defined at a threshold of  $Q \leq 0.2$ . Dashed vertical lines indicate the mean value of each group.

### **Supplementary File Legends**

Supplementary File S1: CRL lncRNAs.

Supplementary File S2: Non-CRL lncRNAs.

Supplementary File S3: The full set of lncRNA drivers predicted by ExInAator in CRL.

Supplementary File S4: The full set of lncRNA drivers predicted by ExInAator in non-CRL.

Supplementary File S5: The full set of protein-coding drivers predicted by ExInAator.

Supplementary File S6: The full set of results for lncRNAs and protein-coding genes described in this study.

Supplementary File S7: Candidates identified by Du et al. that are also considered in our study.

Supplementary File S8: Candidates identified by MiTranscriptome that are also considered in our study.

Supplementary File S9: The full set of CGC drivers analysed in this study.

Supplementary File S10: The set of IDs for protein-coding genes used in this study.

Supplementary File S11: Protein-coding overlap with CGC across all cancers and both datasets.

Supplementary File S12: Effects on ExInAator predictions of various filtering schemes.

# Supplementary Figure S1

Example: Single-exon lncRNA

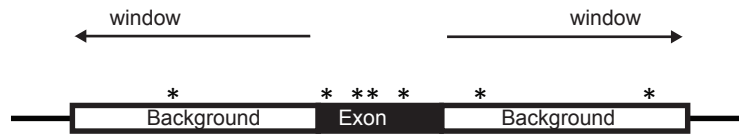

A. Count exon trinucleotides and their central mutations

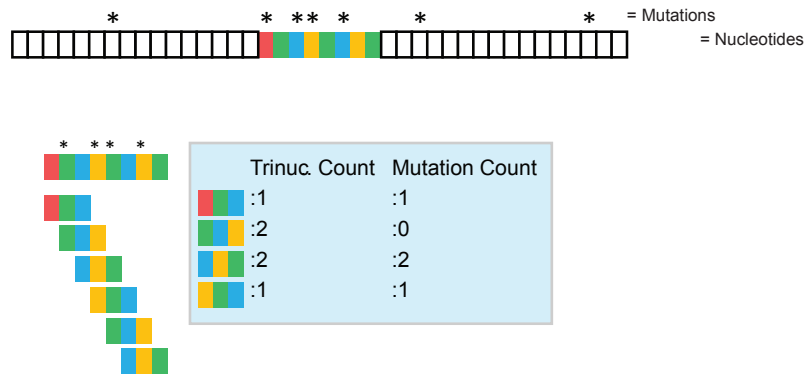

B. Sample, without replacement, equal proportions of the same trinucleotides from background regions. Count the mutations associated with these. Repeat as many times as possible.

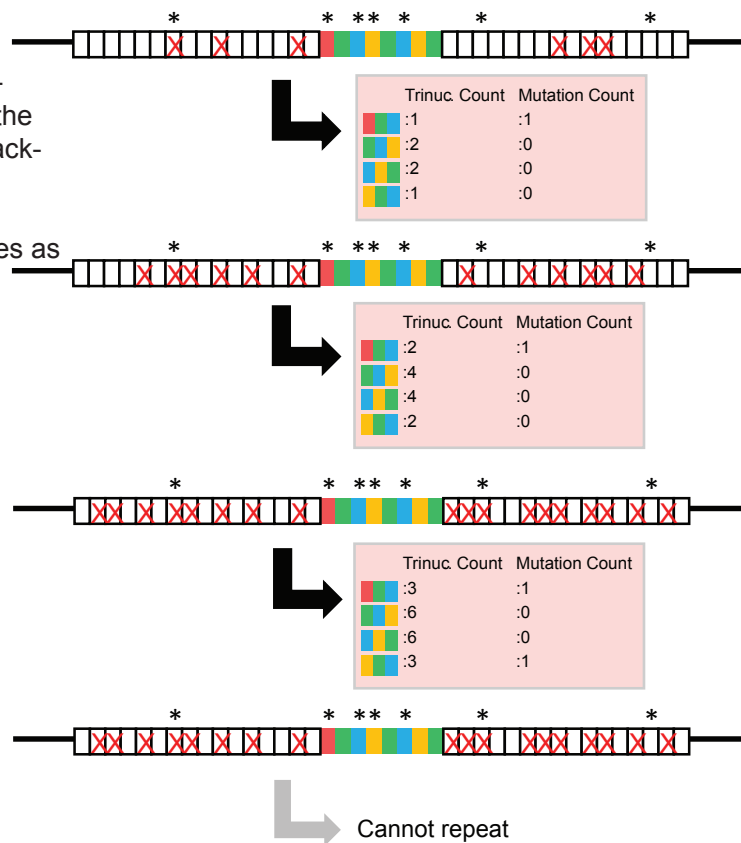

C. Compare mutation counts between exon and background regions.

|                   | Exon                                                                                                                                                                                                                                                                                                                                                                                                | Background             |               |                |                |    |    |                   |    |    |                   |    |    |                   |    |    |                                                                                                                                                                                                                                                                                                                                                                                                     |               |               |                |                |    |    |                   |    |    |                   |    |    |                   |    |    |
|-------------------|-----------------------------------------------------------------------------------------------------------------------------------------------------------------------------------------------------------------------------------------------------------------------------------------------------------------------------------------------------------------------------------------------------|------------------------|---------------|----------------|----------------|----|----|-------------------|----|----|-------------------|----|----|-------------------|----|----|-----------------------------------------------------------------------------------------------------------------------------------------------------------------------------------------------------------------------------------------------------------------------------------------------------------------------------------------------------------------------------------------------------|---------------|---------------|----------------|----------------|----|----|-------------------|----|----|-------------------|----|----|-------------------|----|----|
|                   | <table border="1"> <thead> <tr> <th>Trinucleotide</th> <th>Trinuc. Count</th> <th>Mutation Count</th> </tr> </thead> <tbody> <tr> <td>Red-Blue-Green</td> <td>:1</td> <td>:1</td> </tr> <tr> <td>Green-Blue-Yellow</td> <td>:2</td> <td>:0</td> </tr> <tr> <td>Blue-Yellow-Green</td> <td>:2</td> <td>:2</td> </tr> <tr> <td>Yellow-Green-Blue</td> <td>:1</td> <td>:1</td> </tr> </tbody> </table> | Trinucleotide          | Trinuc. Count | Mutation Count | Red-Blue-Green | :1 | :1 | Green-Blue-Yellow | :2 | :0 | Blue-Yellow-Green | :2 | :2 | Yellow-Green-Blue | :1 | :1 | <table border="1"> <thead> <tr> <th>Trinucleotide</th> <th>Trinuc. Count</th> <th>Mutation Count</th> </tr> </thead> <tbody> <tr> <td>Red-Blue-Green</td> <td>:3</td> <td>:1</td> </tr> <tr> <td>Green-Blue-Yellow</td> <td>:6</td> <td>:0</td> </tr> <tr> <td>Blue-Yellow-Green</td> <td>:6</td> <td>:0</td> </tr> <tr> <td>Yellow-Green-Blue</td> <td>:3</td> <td>:1</td> </tr> </tbody> </table> | Trinucleotide | Trinuc. Count | Mutation Count | Red-Blue-Green | :3 | :1 | Green-Blue-Yellow | :6 | :0 | Blue-Yellow-Green | :6 | :0 | Yellow-Green-Blue | :3 | :1 |
| Trinucleotide     | Trinuc. Count                                                                                                                                                                                                                                                                                                                                                                                       | Mutation Count         |               |                |                |    |    |                   |    |    |                   |    |    |                   |    |    |                                                                                                                                                                                                                                                                                                                                                                                                     |               |               |                |                |    |    |                   |    |    |                   |    |    |                   |    |    |
| Red-Blue-Green    | :1                                                                                                                                                                                                                                                                                                                                                                                                  | :1                     |               |                |                |    |    |                   |    |    |                   |    |    |                   |    |    |                                                                                                                                                                                                                                                                                                                                                                                                     |               |               |                |                |    |    |                   |    |    |                   |    |    |                   |    |    |
| Green-Blue-Yellow | :2                                                                                                                                                                                                                                                                                                                                                                                                  | :0                     |               |                |                |    |    |                   |    |    |                   |    |    |                   |    |    |                                                                                                                                                                                                                                                                                                                                                                                                     |               |               |                |                |    |    |                   |    |    |                   |    |    |                   |    |    |
| Blue-Yellow-Green | :2                                                                                                                                                                                                                                                                                                                                                                                                  | :2                     |               |                |                |    |    |                   |    |    |                   |    |    |                   |    |    |                                                                                                                                                                                                                                                                                                                                                                                                     |               |               |                |                |    |    |                   |    |    |                   |    |    |                   |    |    |
| Yellow-Green-Blue | :1                                                                                                                                                                                                                                                                                                                                                                                                  | :1                     |               |                |                |    |    |                   |    |    |                   |    |    |                   |    |    |                                                                                                                                                                                                                                                                                                                                                                                                     |               |               |                |                |    |    |                   |    |    |                   |    |    |                   |    |    |
| Trinucleotide     | Trinuc. Count                                                                                                                                                                                                                                                                                                                                                                                       | Mutation Count         |               |                |                |    |    |                   |    |    |                   |    |    |                   |    |    |                                                                                                                                                                                                                                                                                                                                                                                                     |               |               |                |                |    |    |                   |    |    |                   |    |    |                   |    |    |
| Red-Blue-Green    | :3                                                                                                                                                                                                                                                                                                                                                                                                  | :1                     |               |                |                |    |    |                   |    |    |                   |    |    |                   |    |    |                                                                                                                                                                                                                                                                                                                                                                                                     |               |               |                |                |    |    |                   |    |    |                   |    |    |                   |    |    |
| Green-Blue-Yellow | :6                                                                                                                                                                                                                                                                                                                                                                                                  | :0                     |               |                |                |    |    |                   |    |    |                   |    |    |                   |    |    |                                                                                                                                                                                                                                                                                                                                                                                                     |               |               |                |                |    |    |                   |    |    |                   |    |    |                   |    |    |
| Blue-Yellow-Green | :6                                                                                                                                                                                                                                                                                                                                                                                                  | :0                     |               |                |                |    |    |                   |    |    |                   |    |    |                   |    |    |                                                                                                                                                                                                                                                                                                                                                                                                     |               |               |                |                |    |    |                   |    |    |                   |    |    |                   |    |    |
| Yellow-Green-Blue | :3                                                                                                                                                                                                                                                                                                                                                                                                  | :1                     |               |                |                |    |    |                   |    |    |                   |    |    |                   |    |    |                                                                                                                                                                                                                                                                                                                                                                                                     |               |               |                |                |    |    |                   |    |    |                   |    |    |                   |    |    |
| <b>Total</b>      | <b>N = 6    M = 4</b>                                                                                                                                                                                                                                                                                                                                                                               | <b>n = 18    m = 2</b> |               |                |                |    |    |                   |    |    |                   |    |    |                   |    |    |                                                                                                                                                                                                                                                                                                                                                                                                     |               |               |                |                |    |    |                   |    |    |                   |    |    |                   |    |    |

Supplementary Figure S2

Exon/Background Mutation/Kb

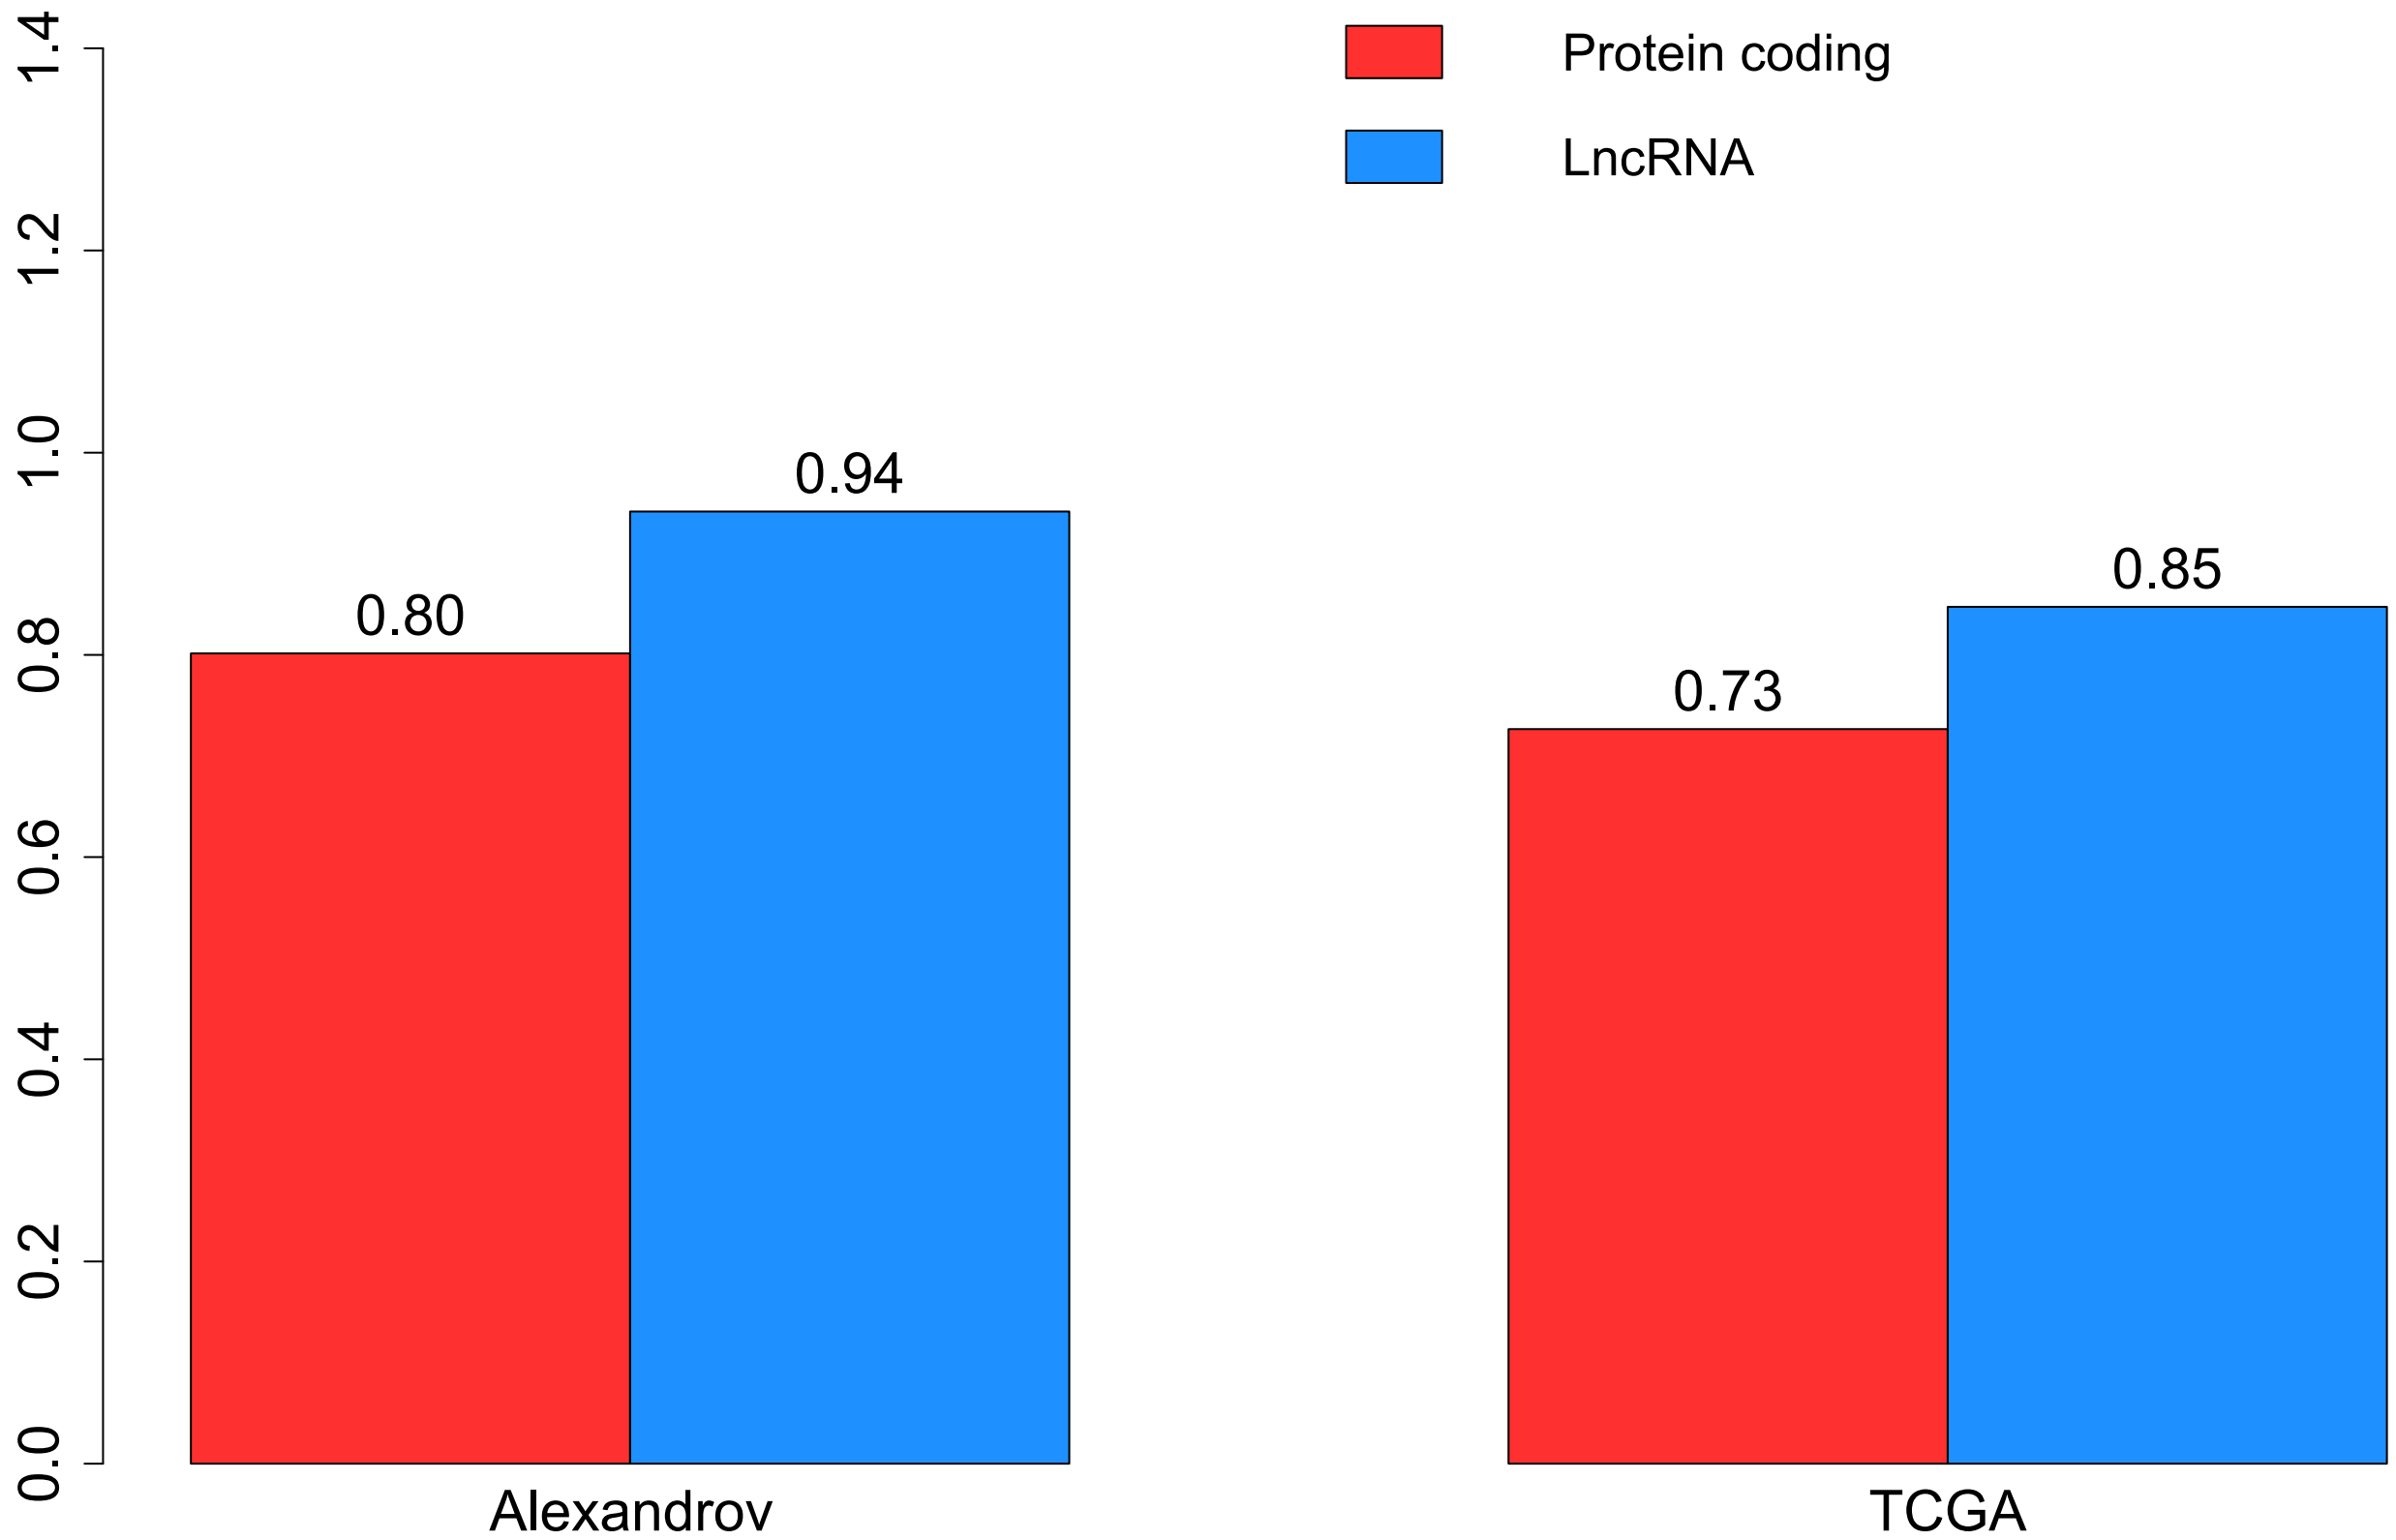

# Supplementary Figure S3

## Coding BLCA – 5407 genes

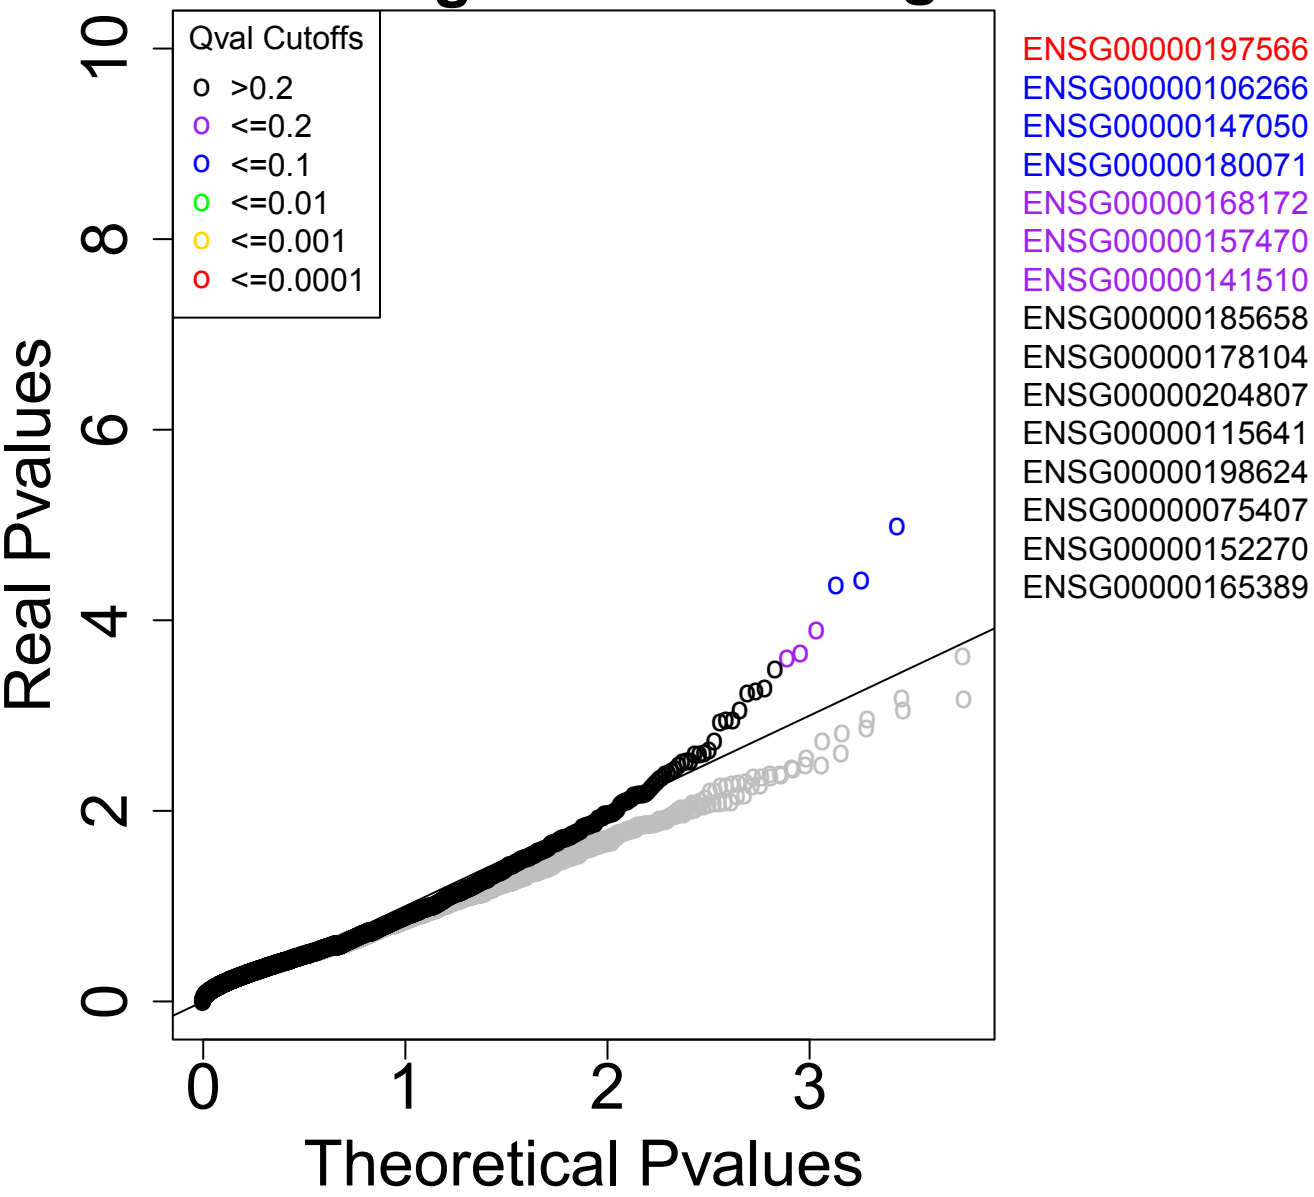

# Coding BRCA – 7115 genes

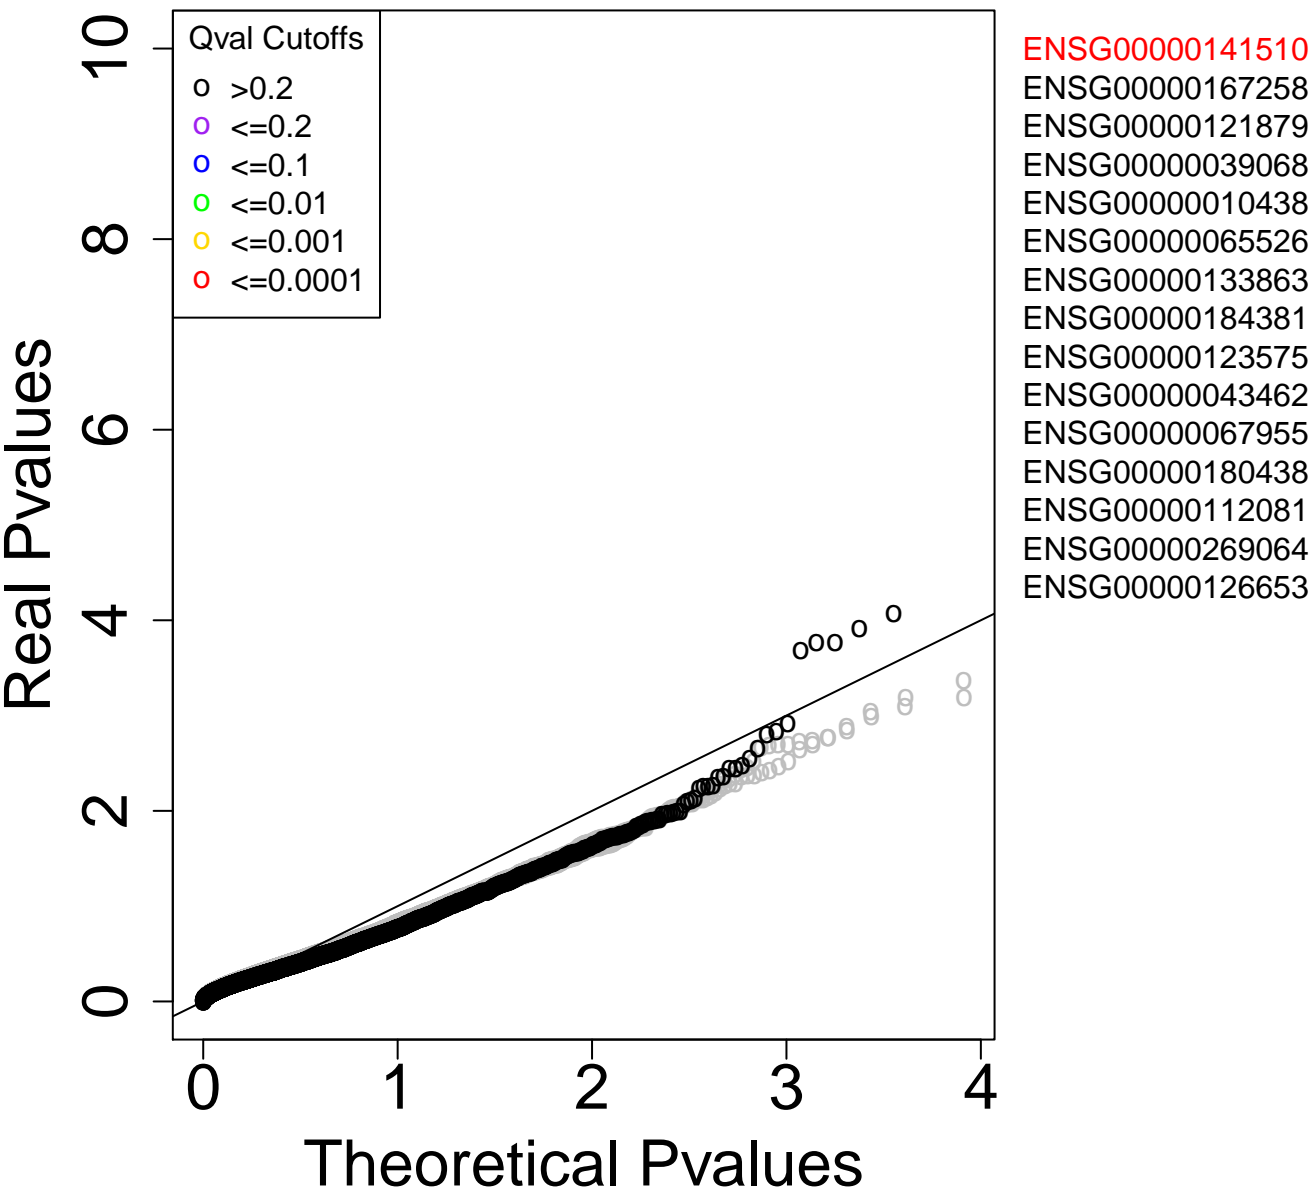

# Coding Breast – 8045 genes

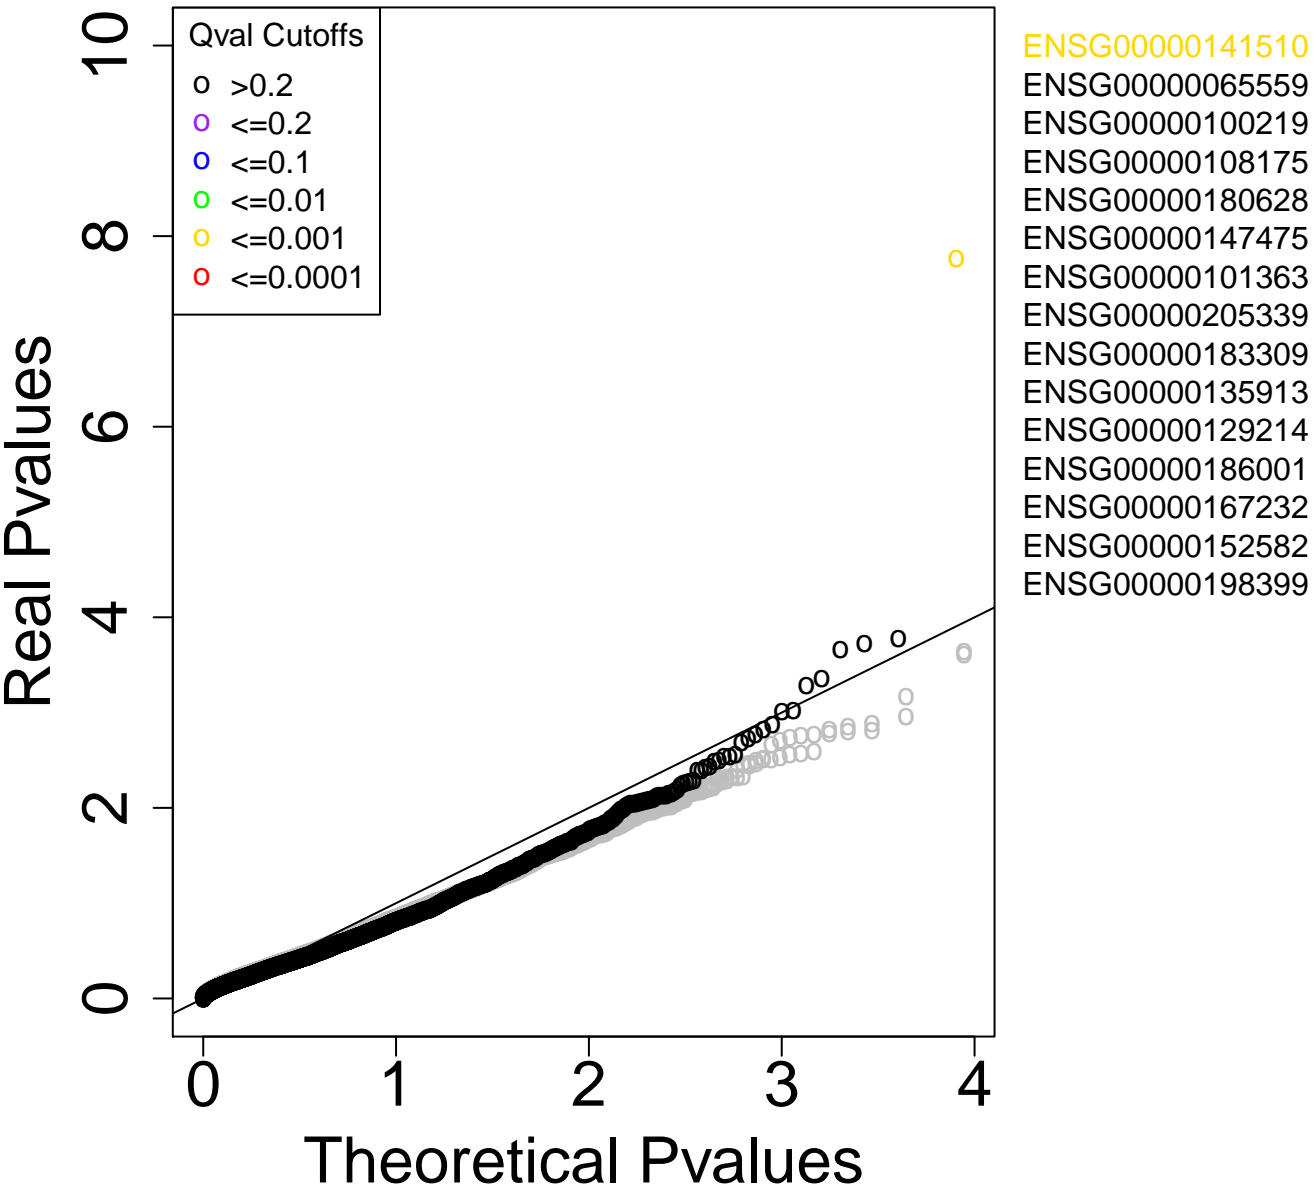



# Coding CLL – 256 genes

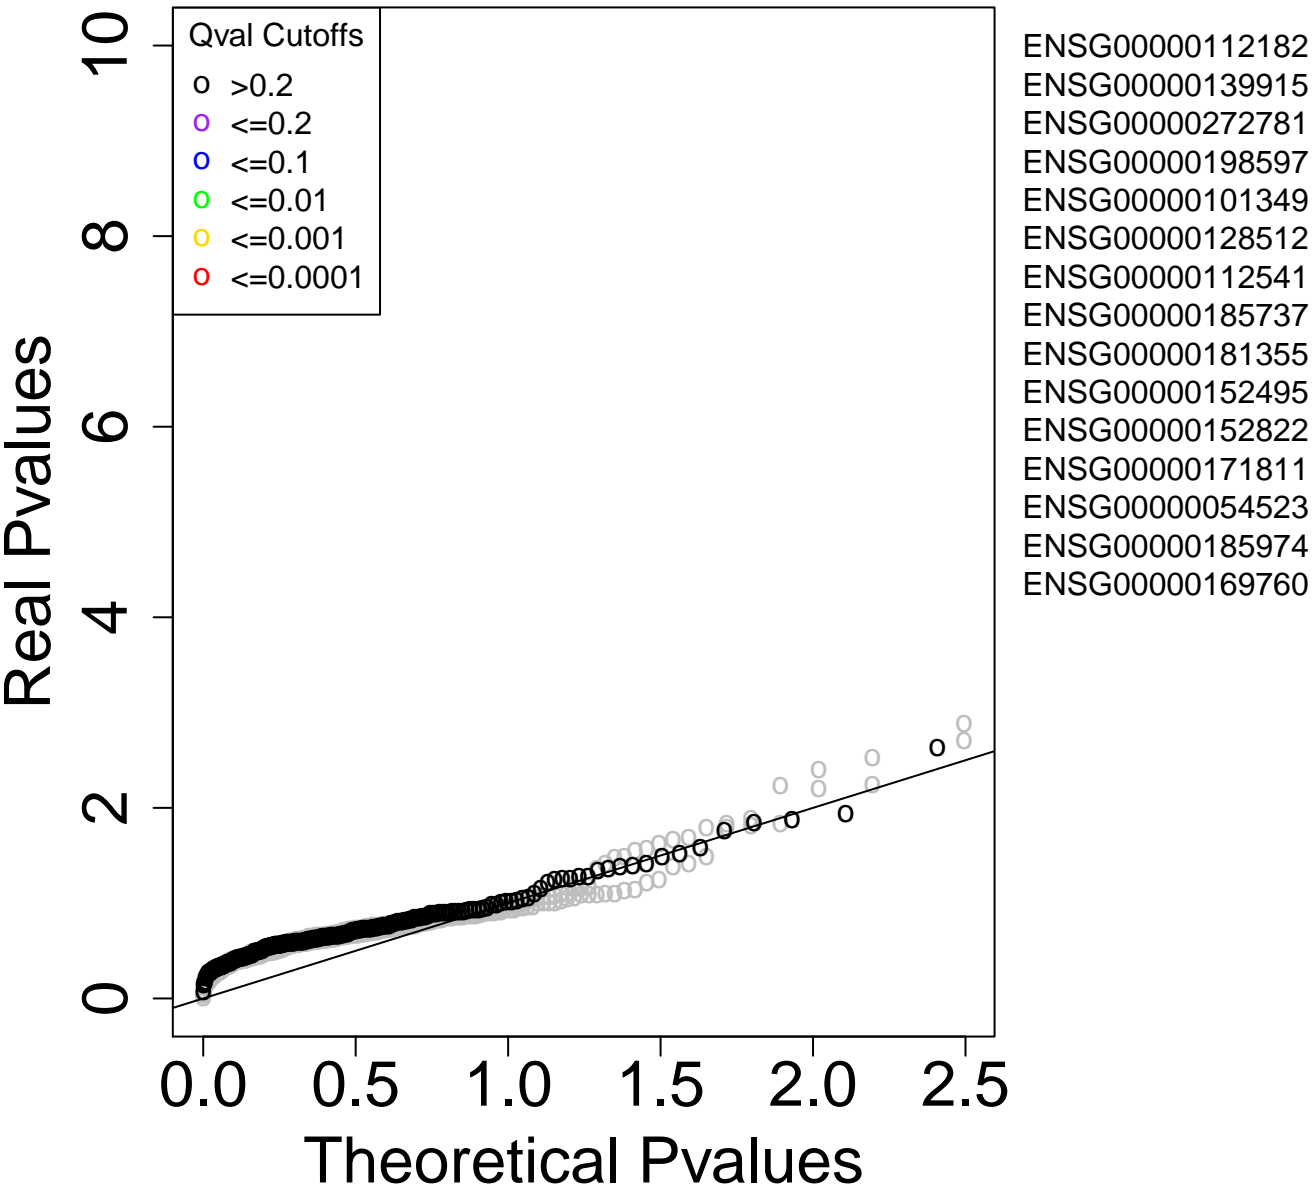

# Coding CRC – 16265 genes

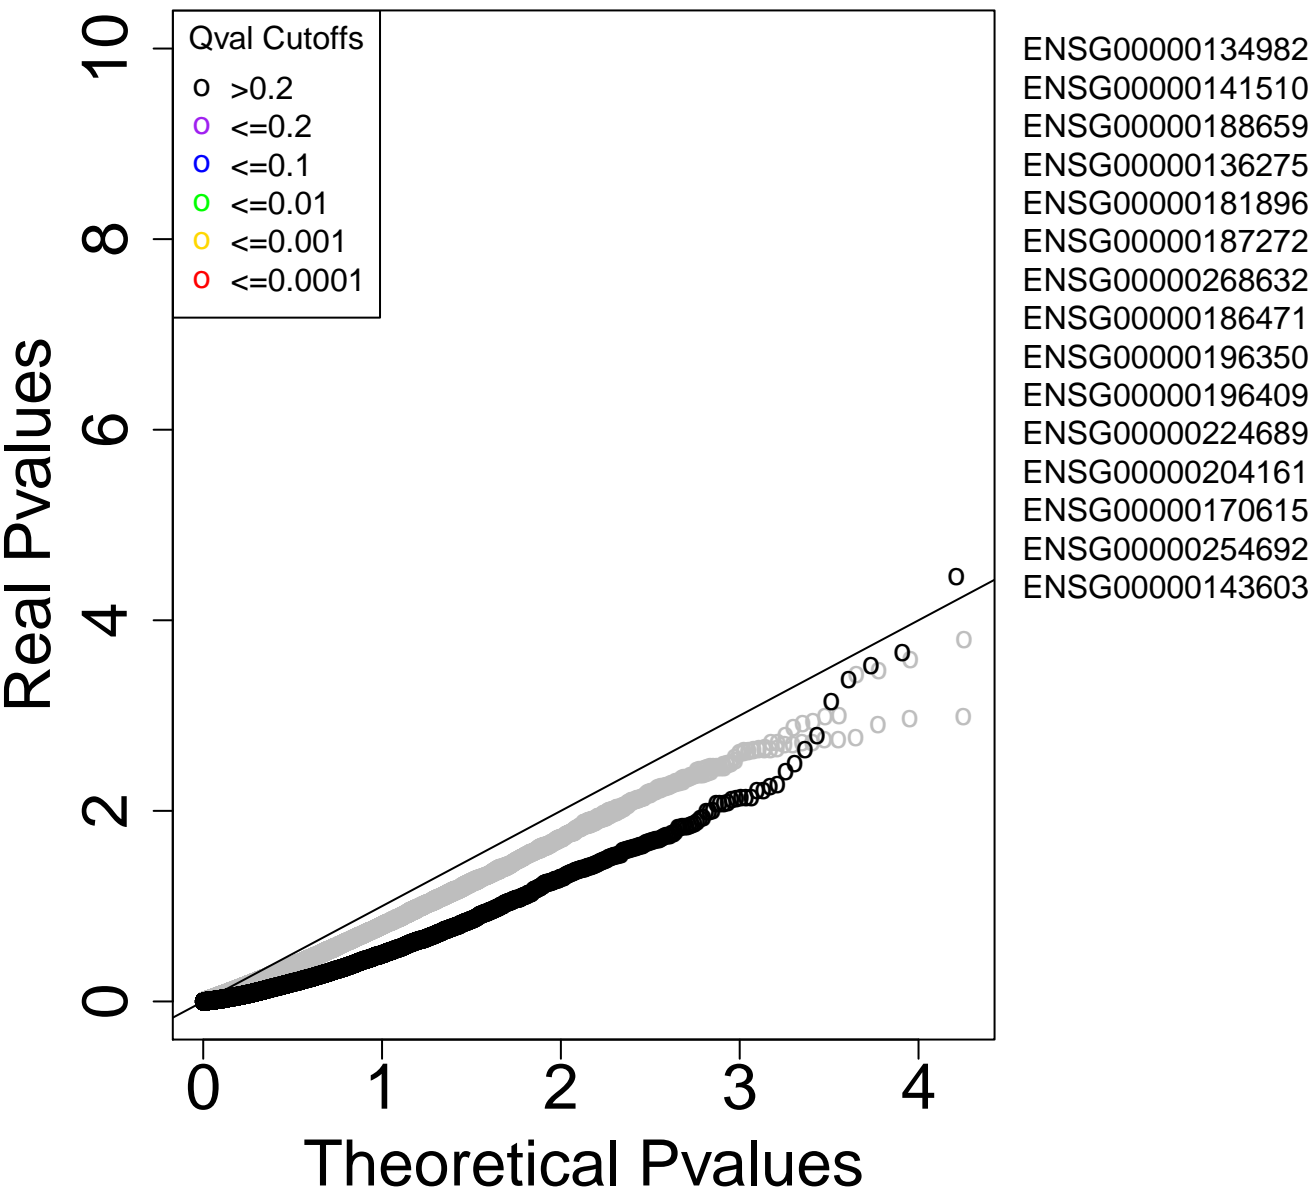

# Coding GBM – 1262 genes

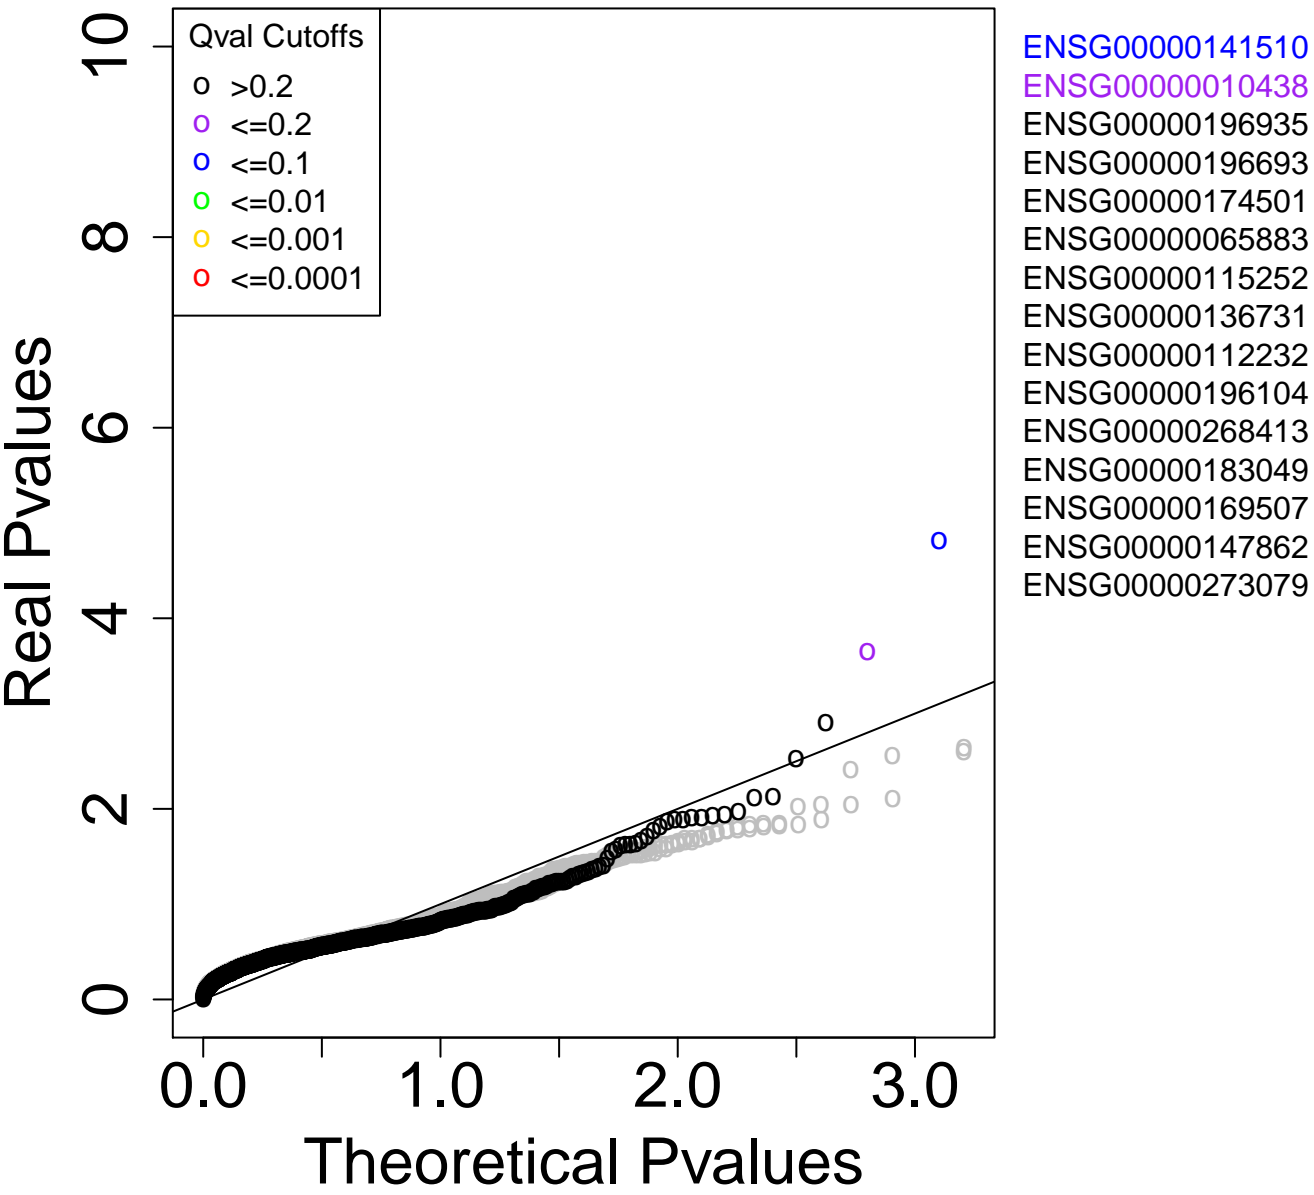

# Coding HNSC – 3482 genes

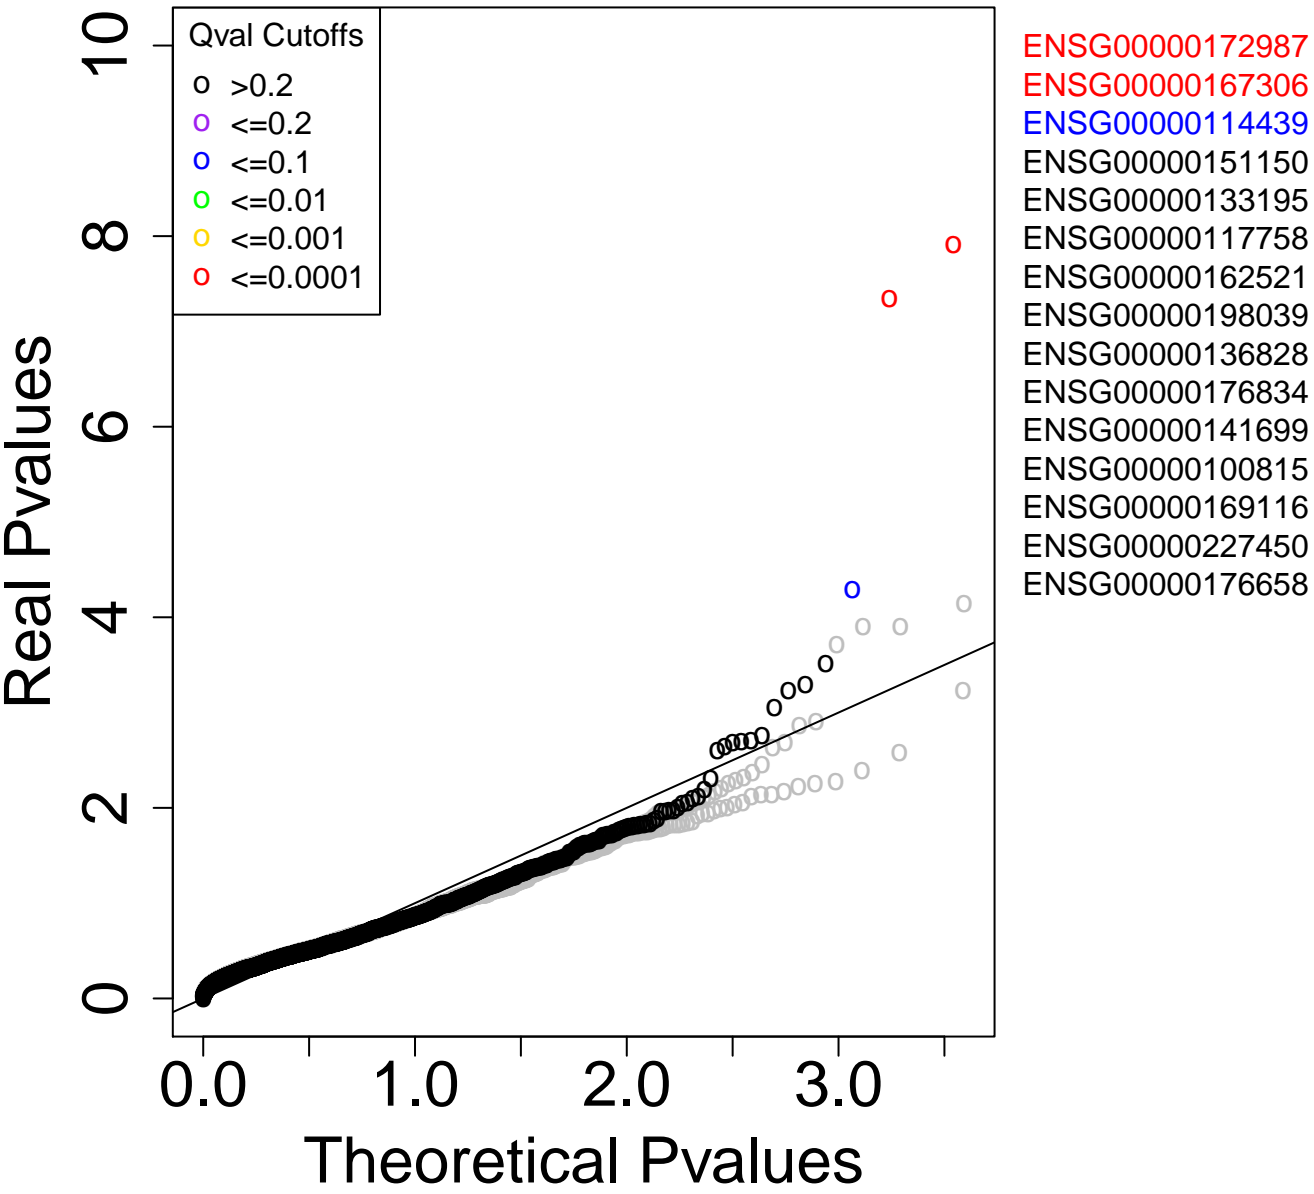

# Coding KICH – 104 genes

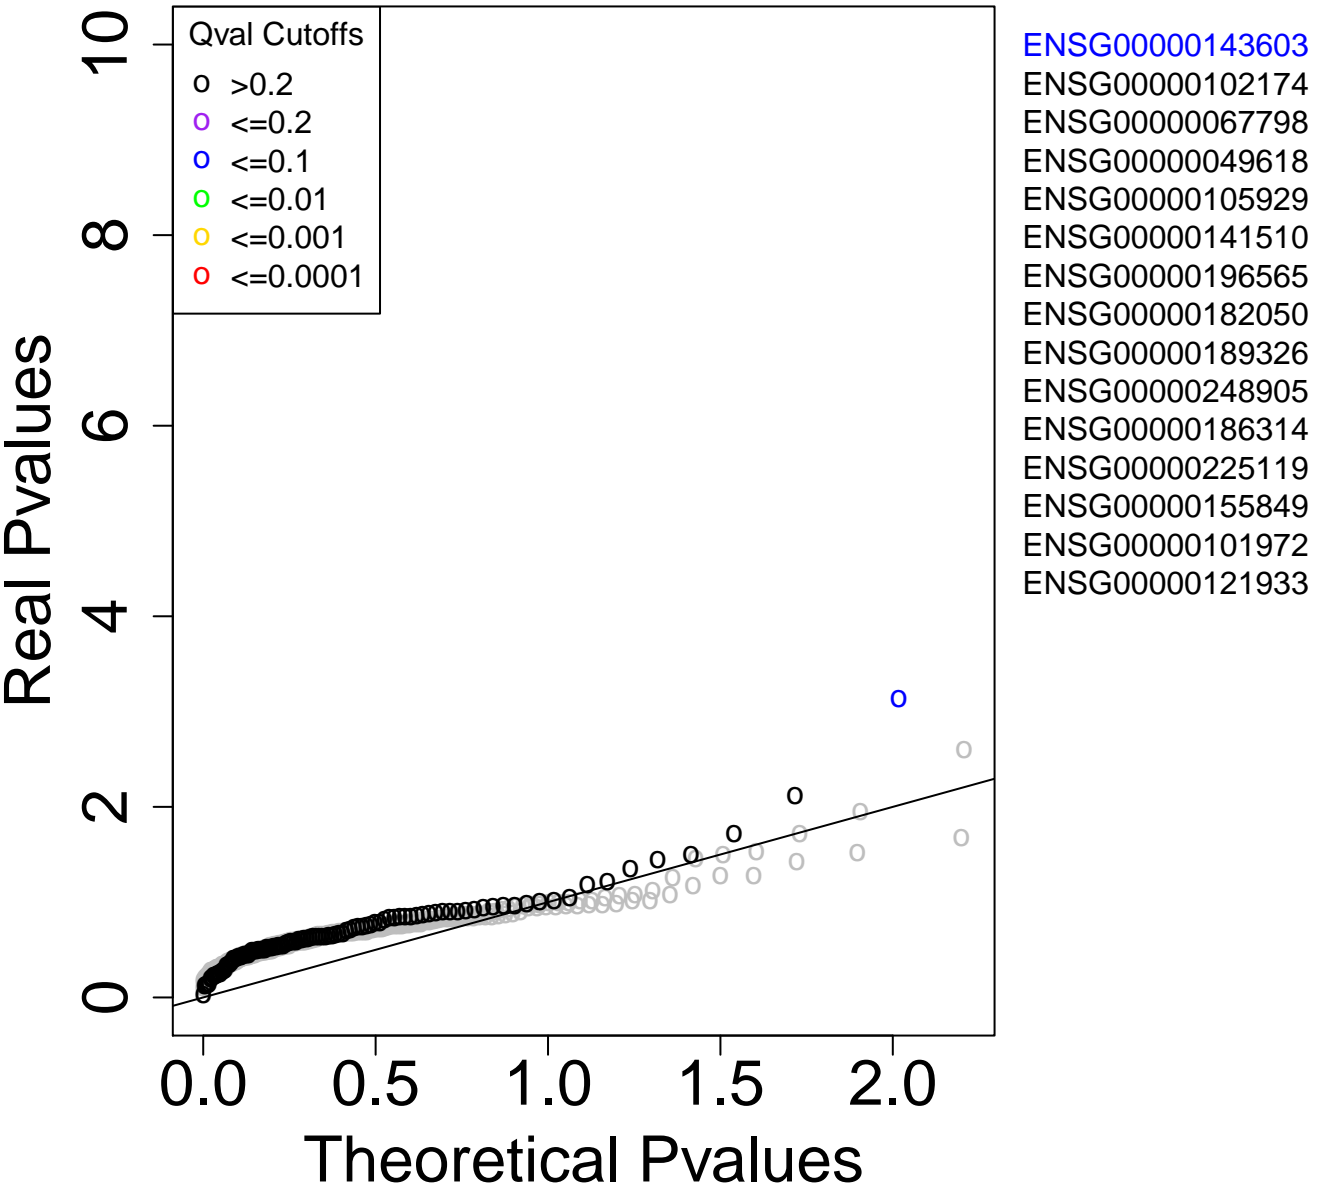

# Coding KIRC – 1566 genes

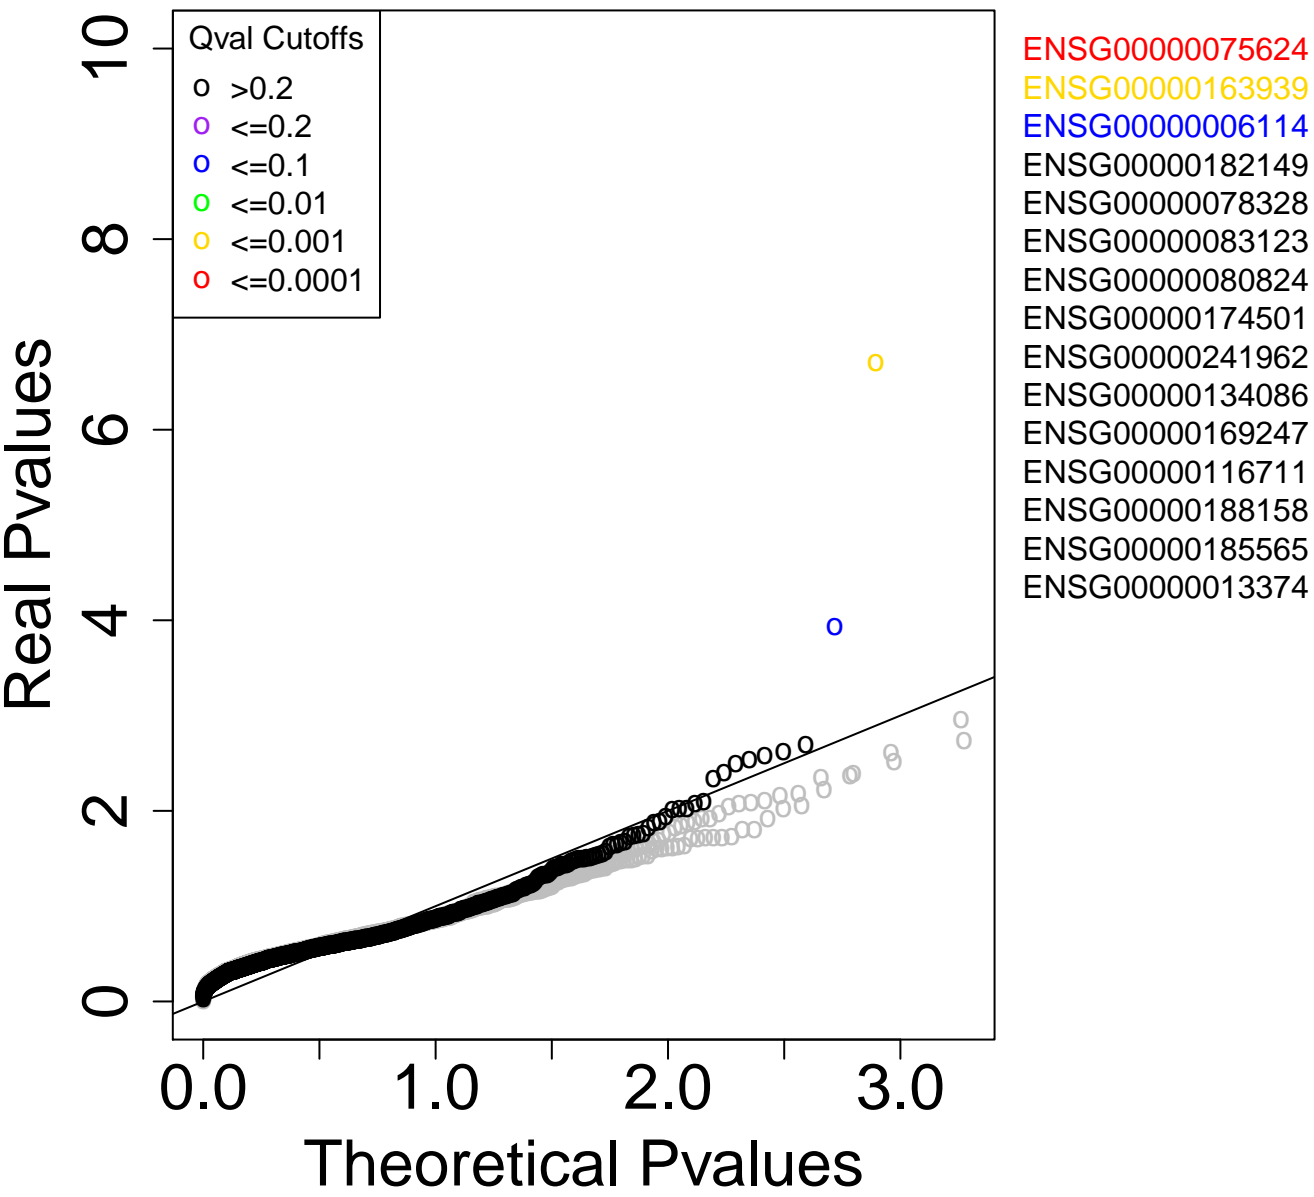

# Coding LGG – 168 genes

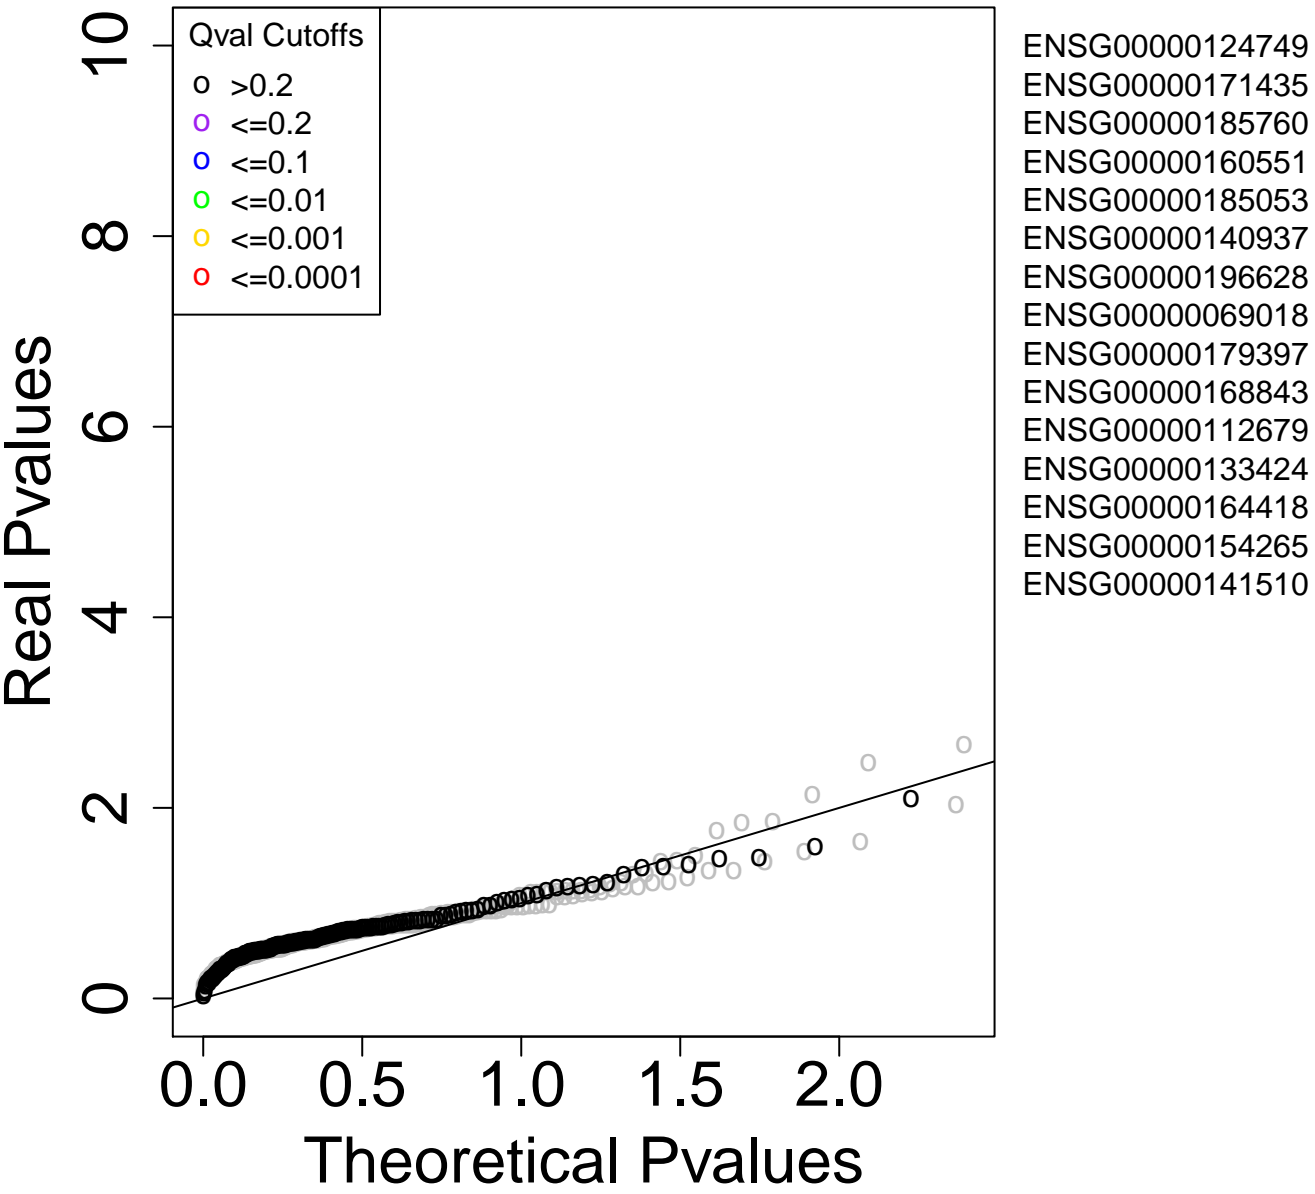

# Coding Liver – 7982 genes

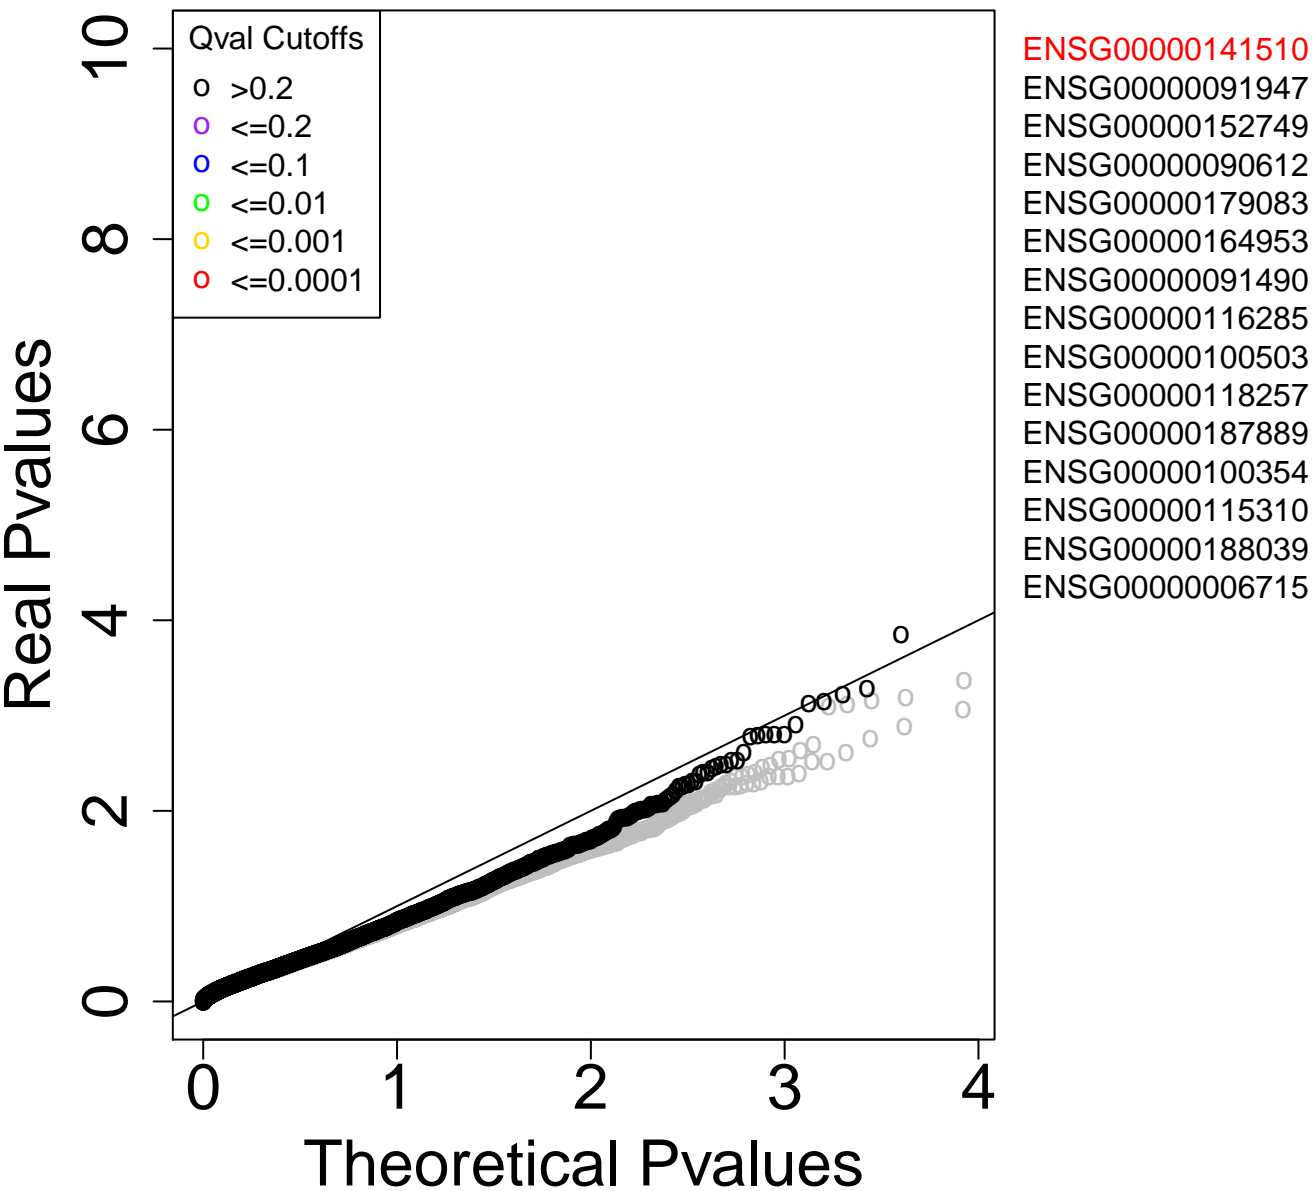



# Coding LUAD – 8082 genes

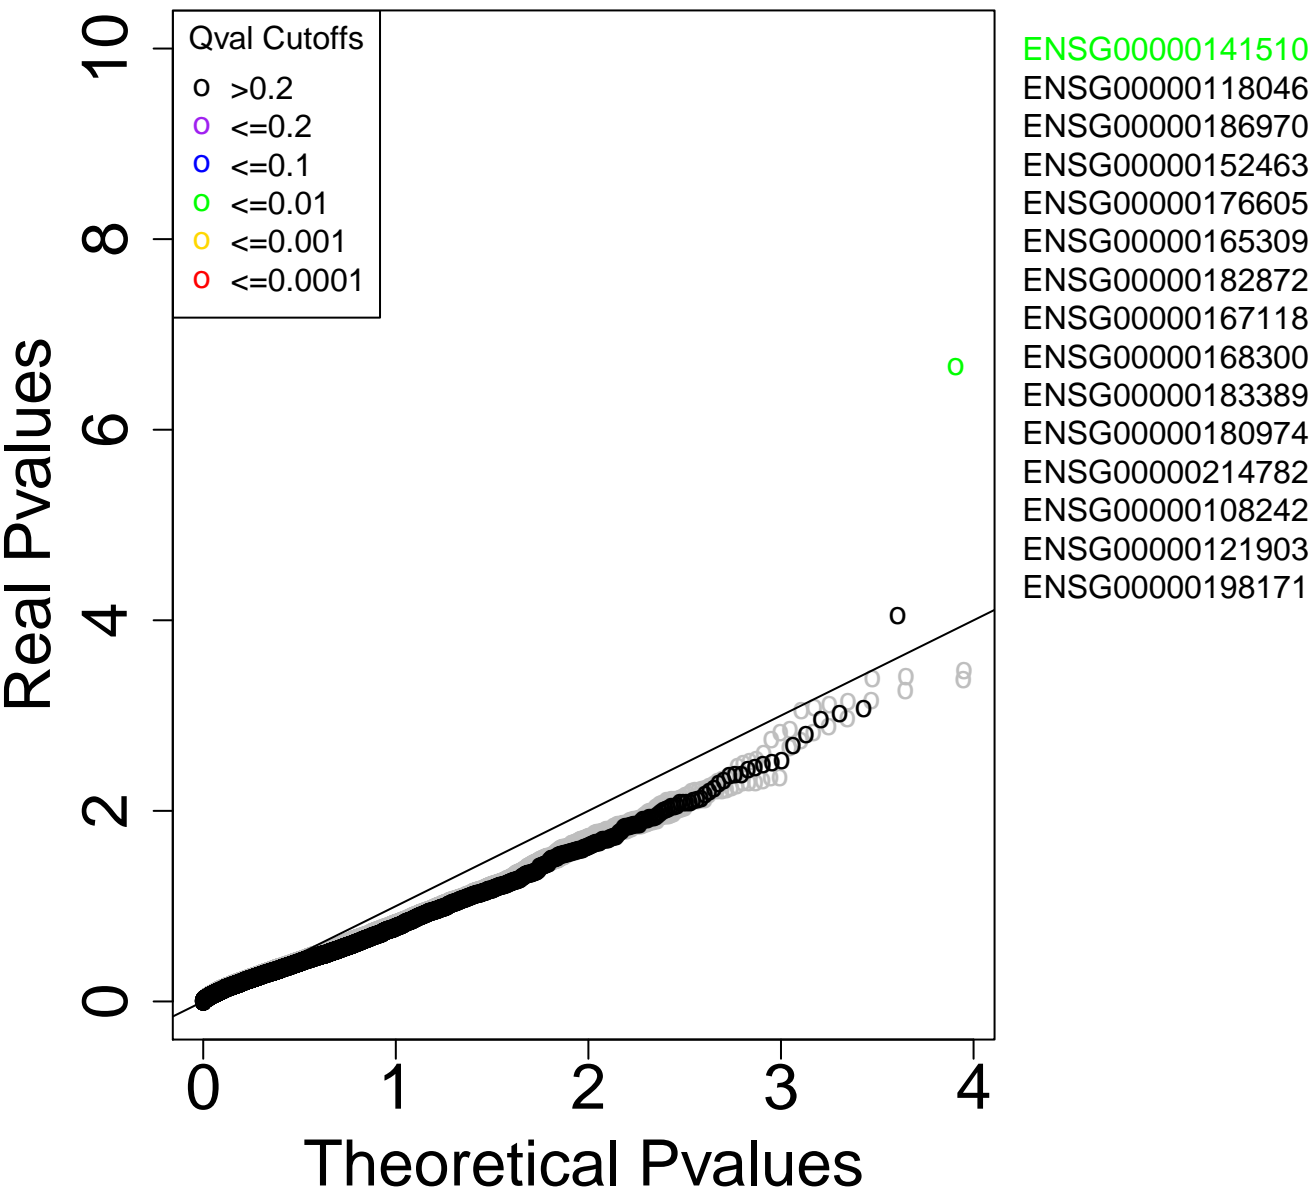

# Coding Lung\_adeno – 9893 genes

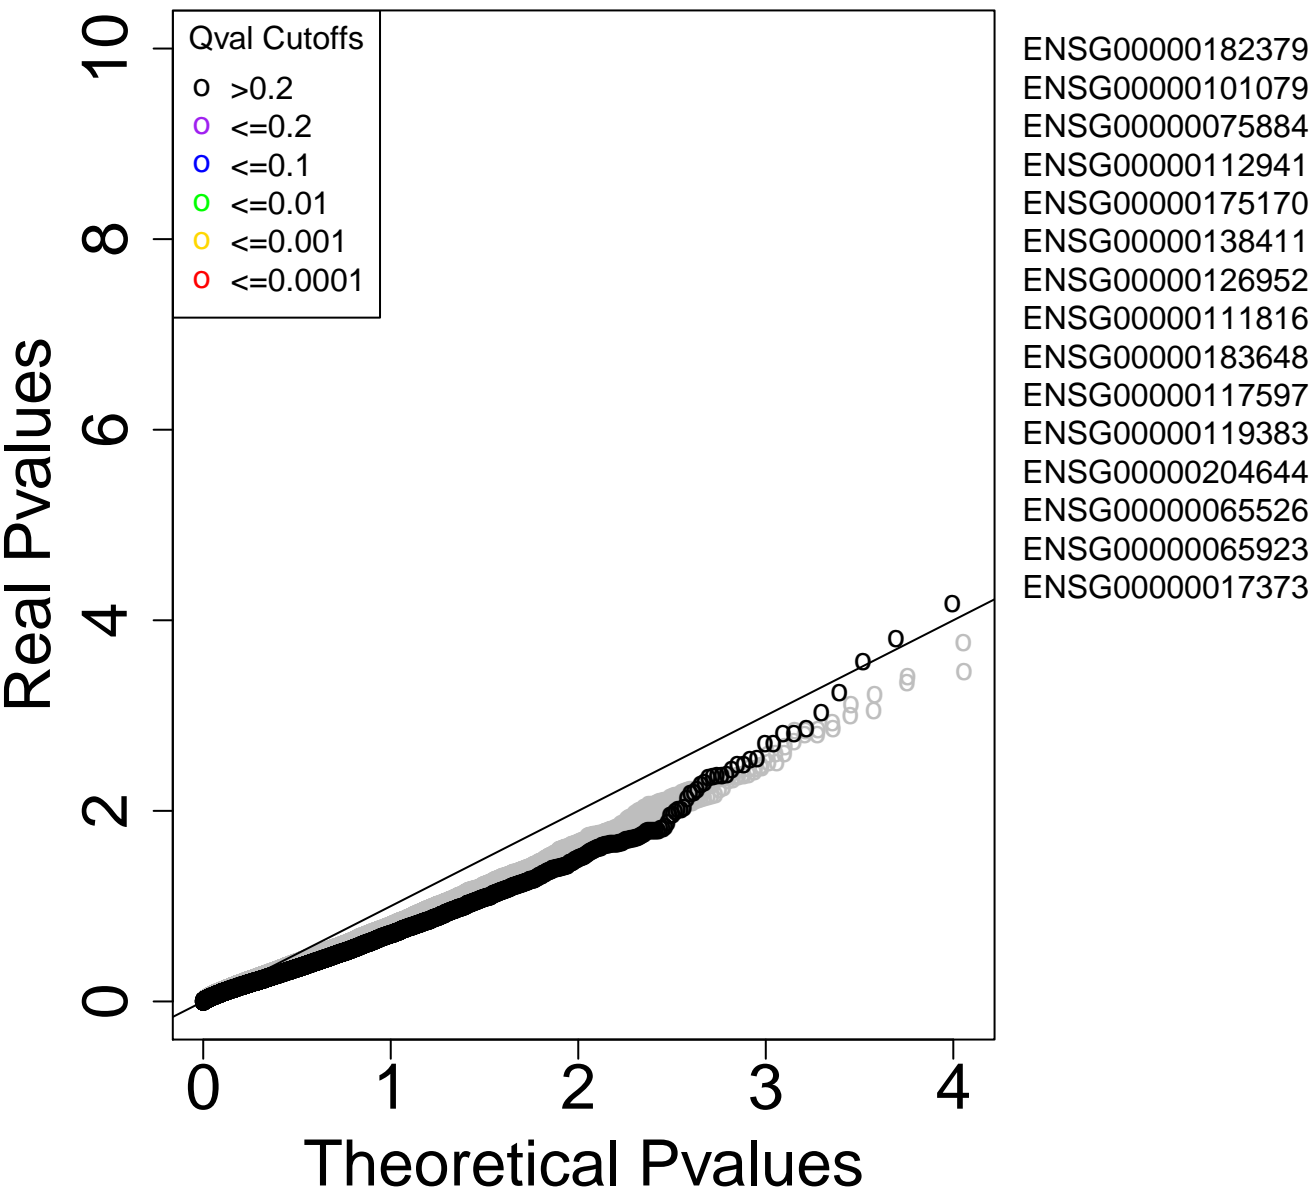

# Coding LUSC – 10329 genes

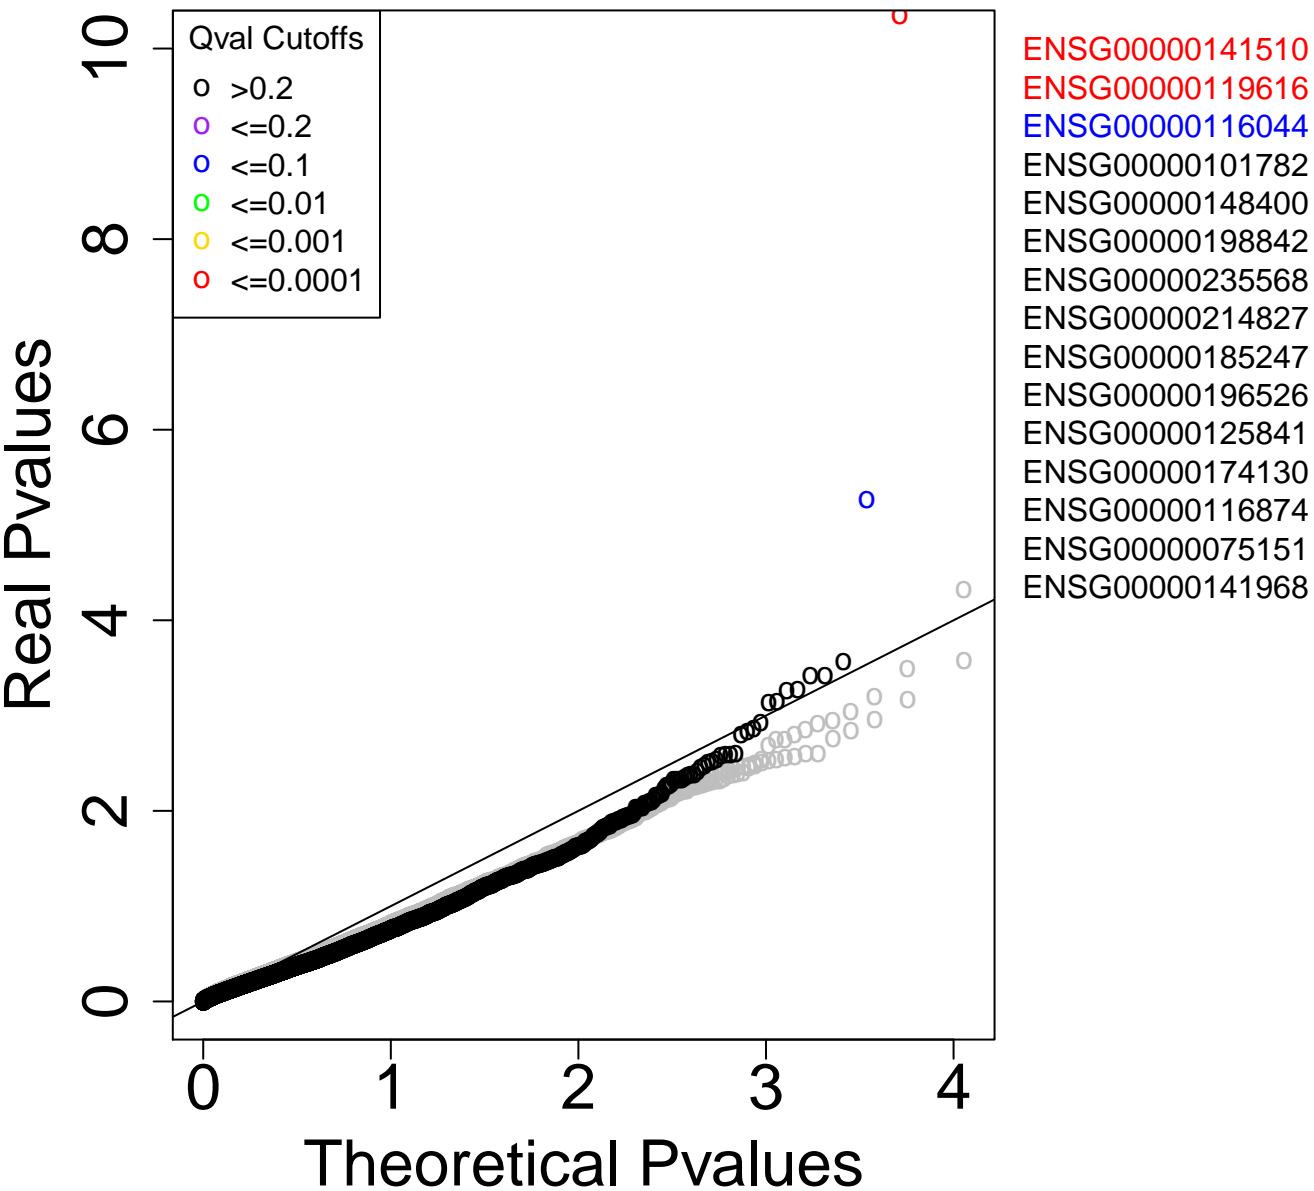

# Coding Lymphoma\_B-cell – 1038 genes

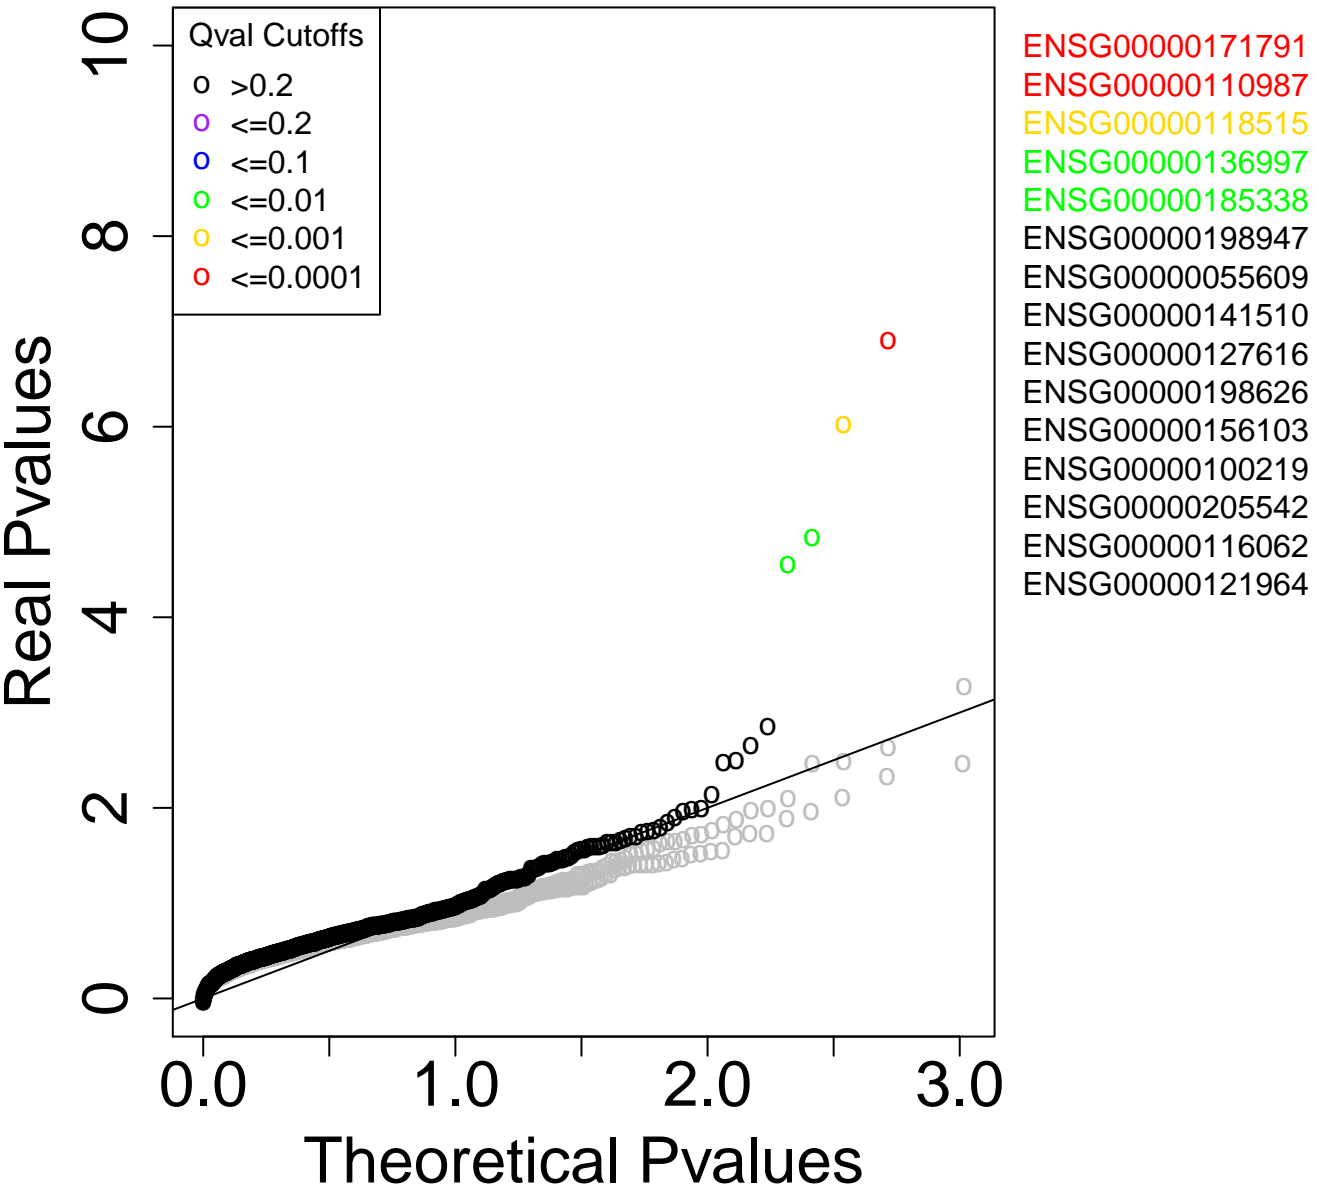

# Coding Medulloblastoma – 1488 genes

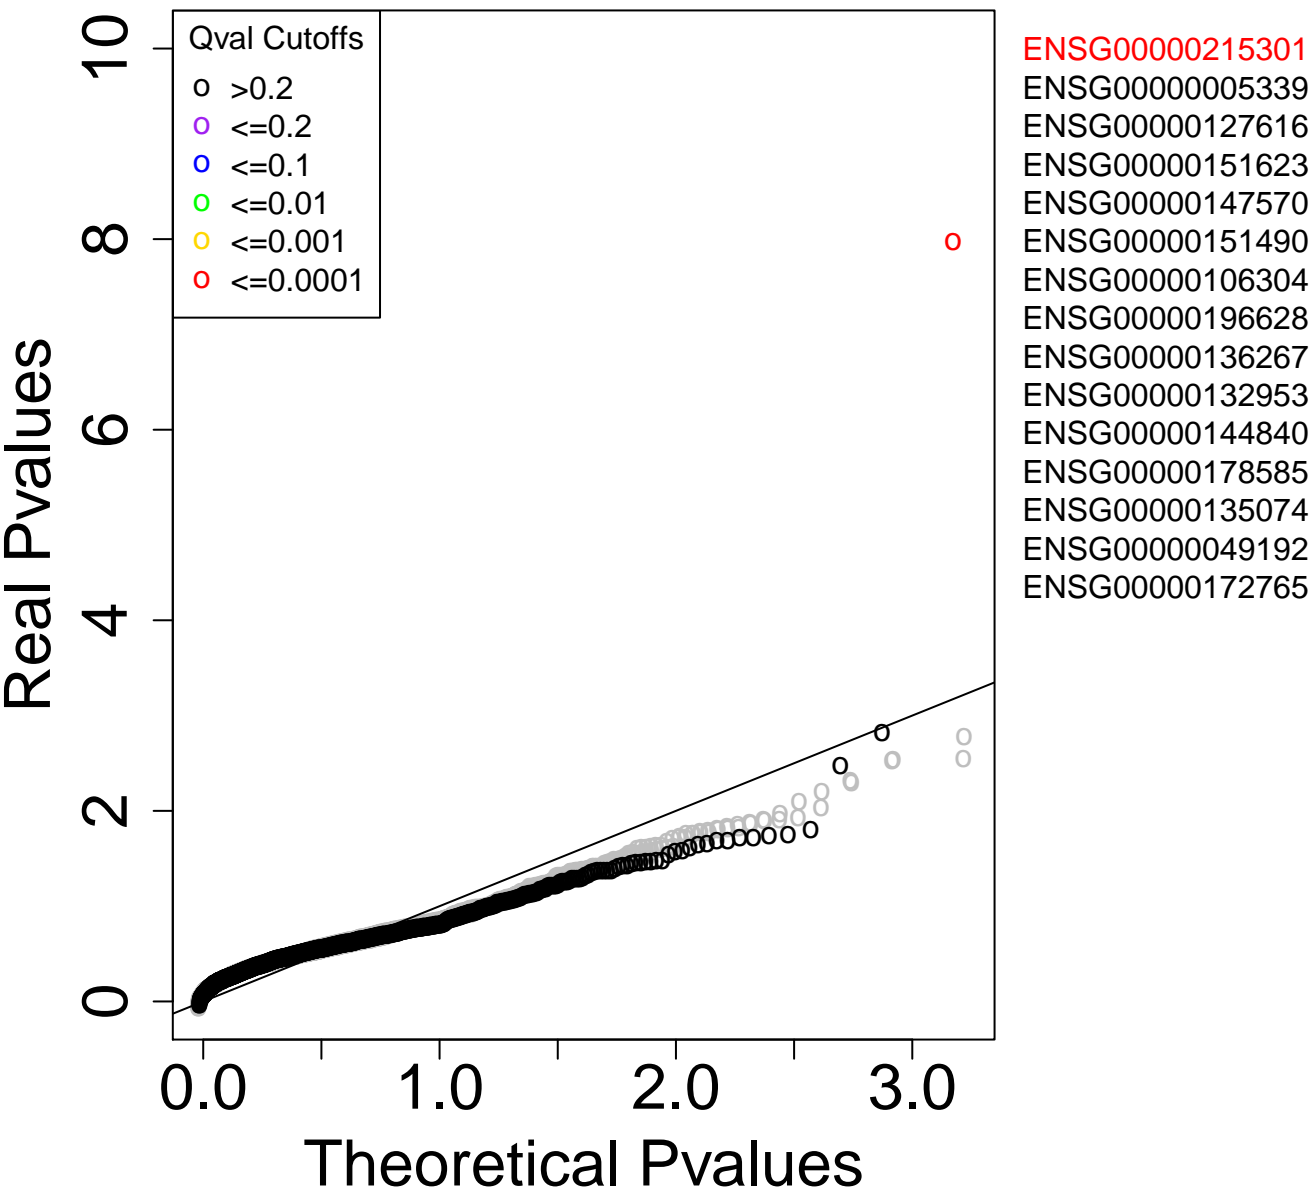

# Ranking Pancancer\_Alexandrov – 18261 genes

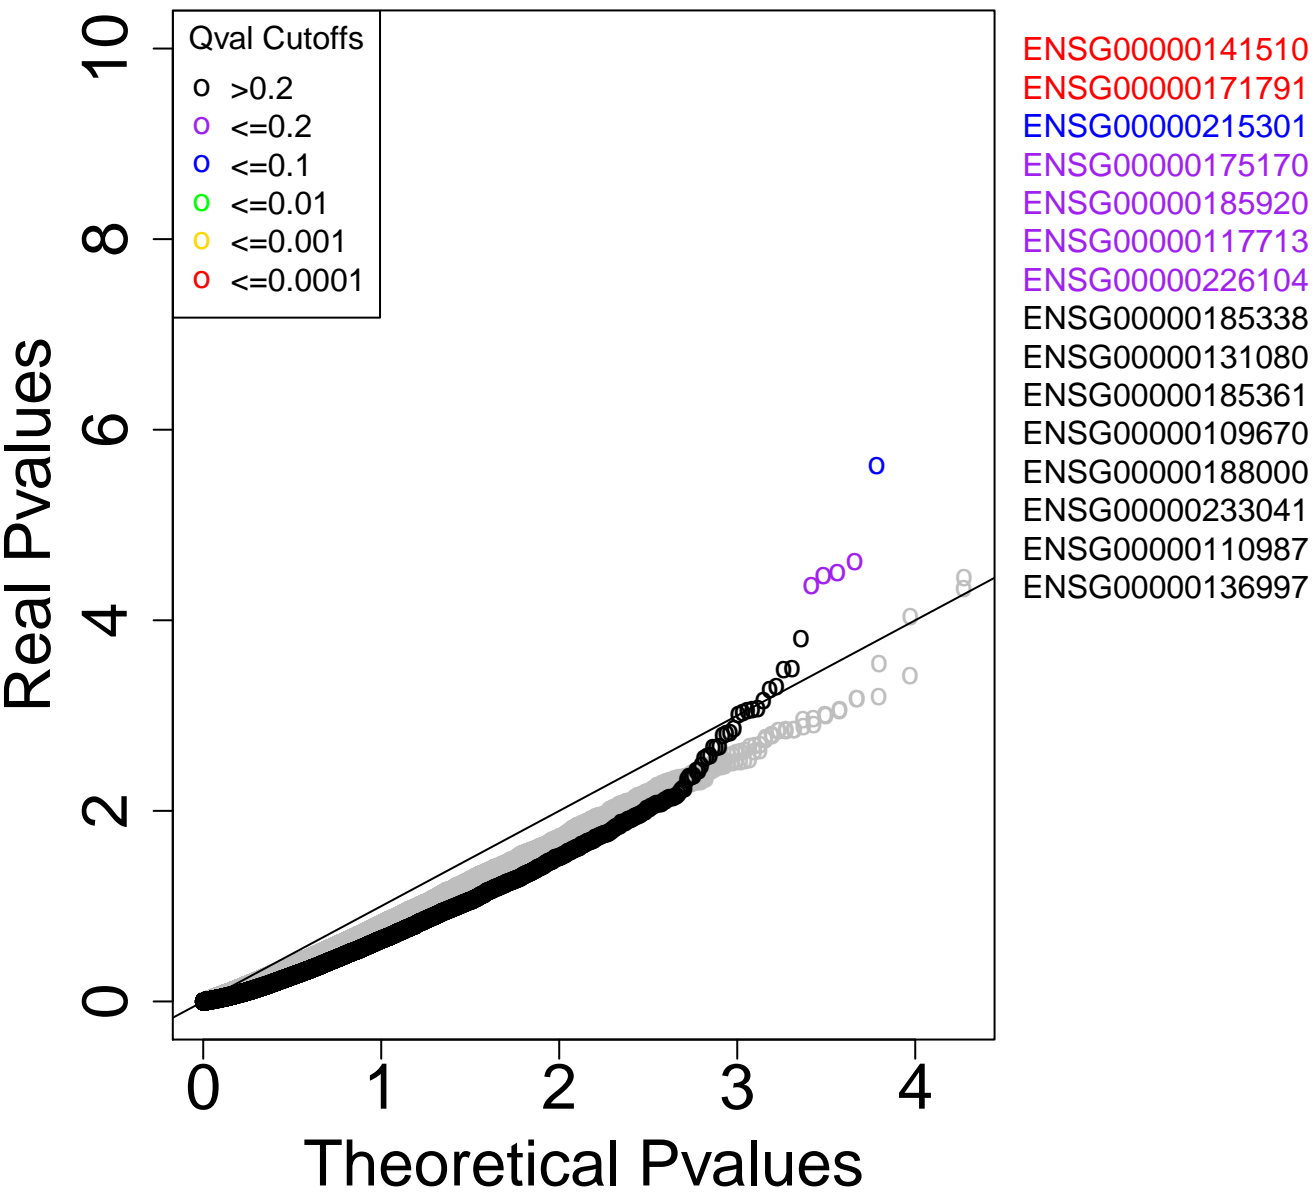

# Coding Pancancer\_TCGA – 19313 genes

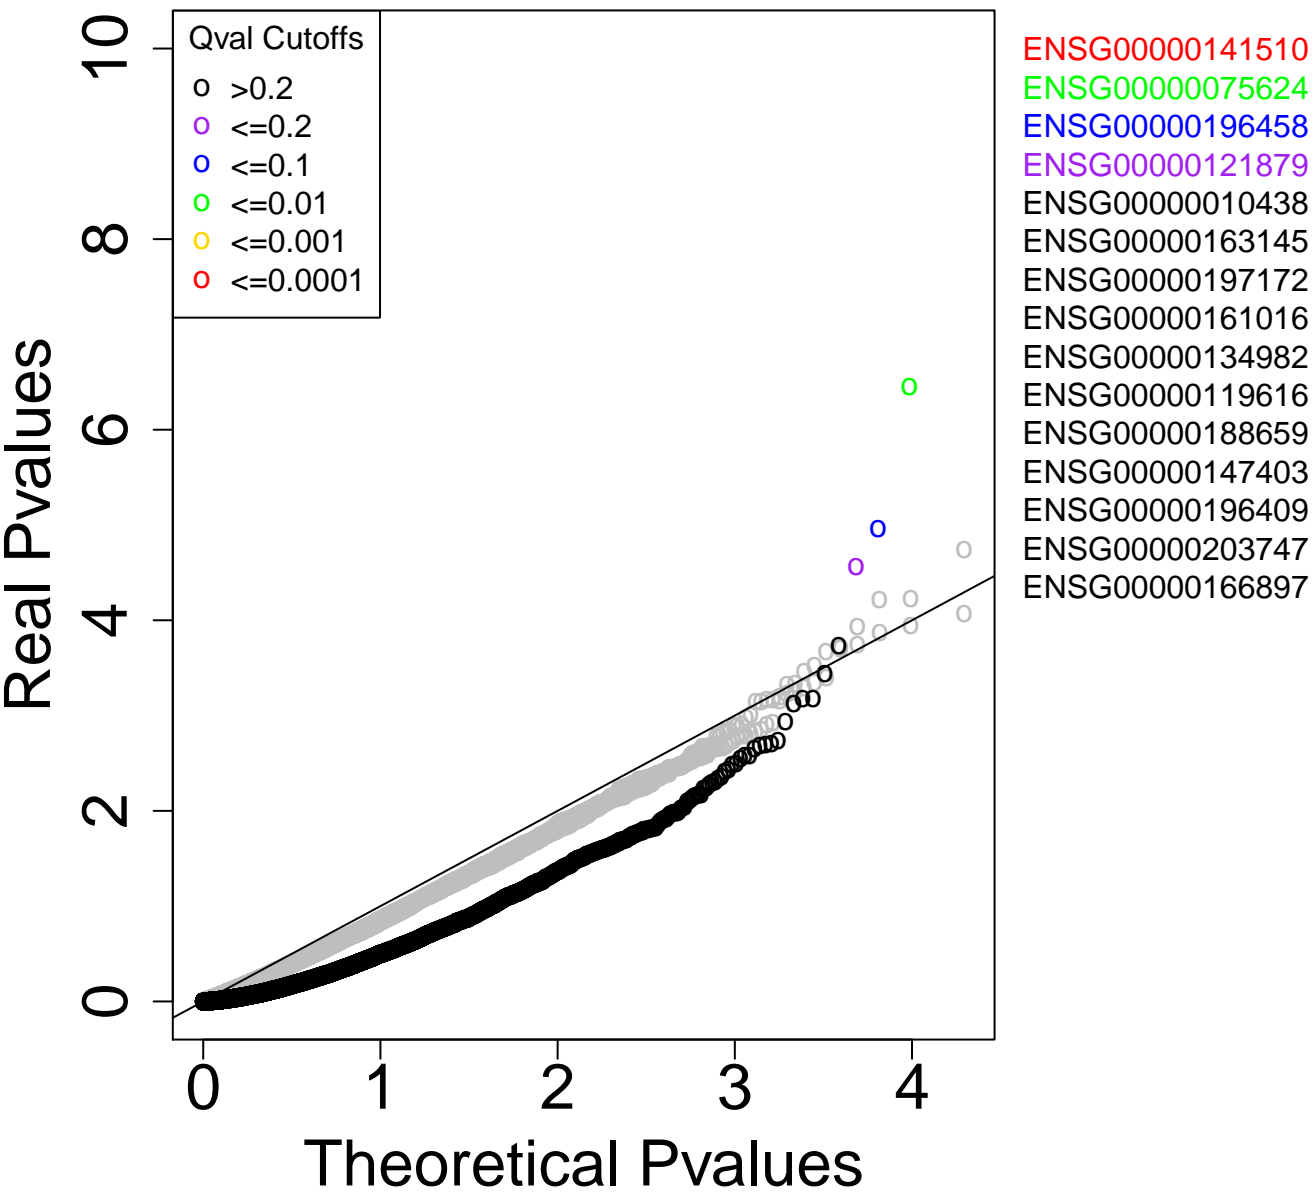

# Coding Pancreas – 960 genes

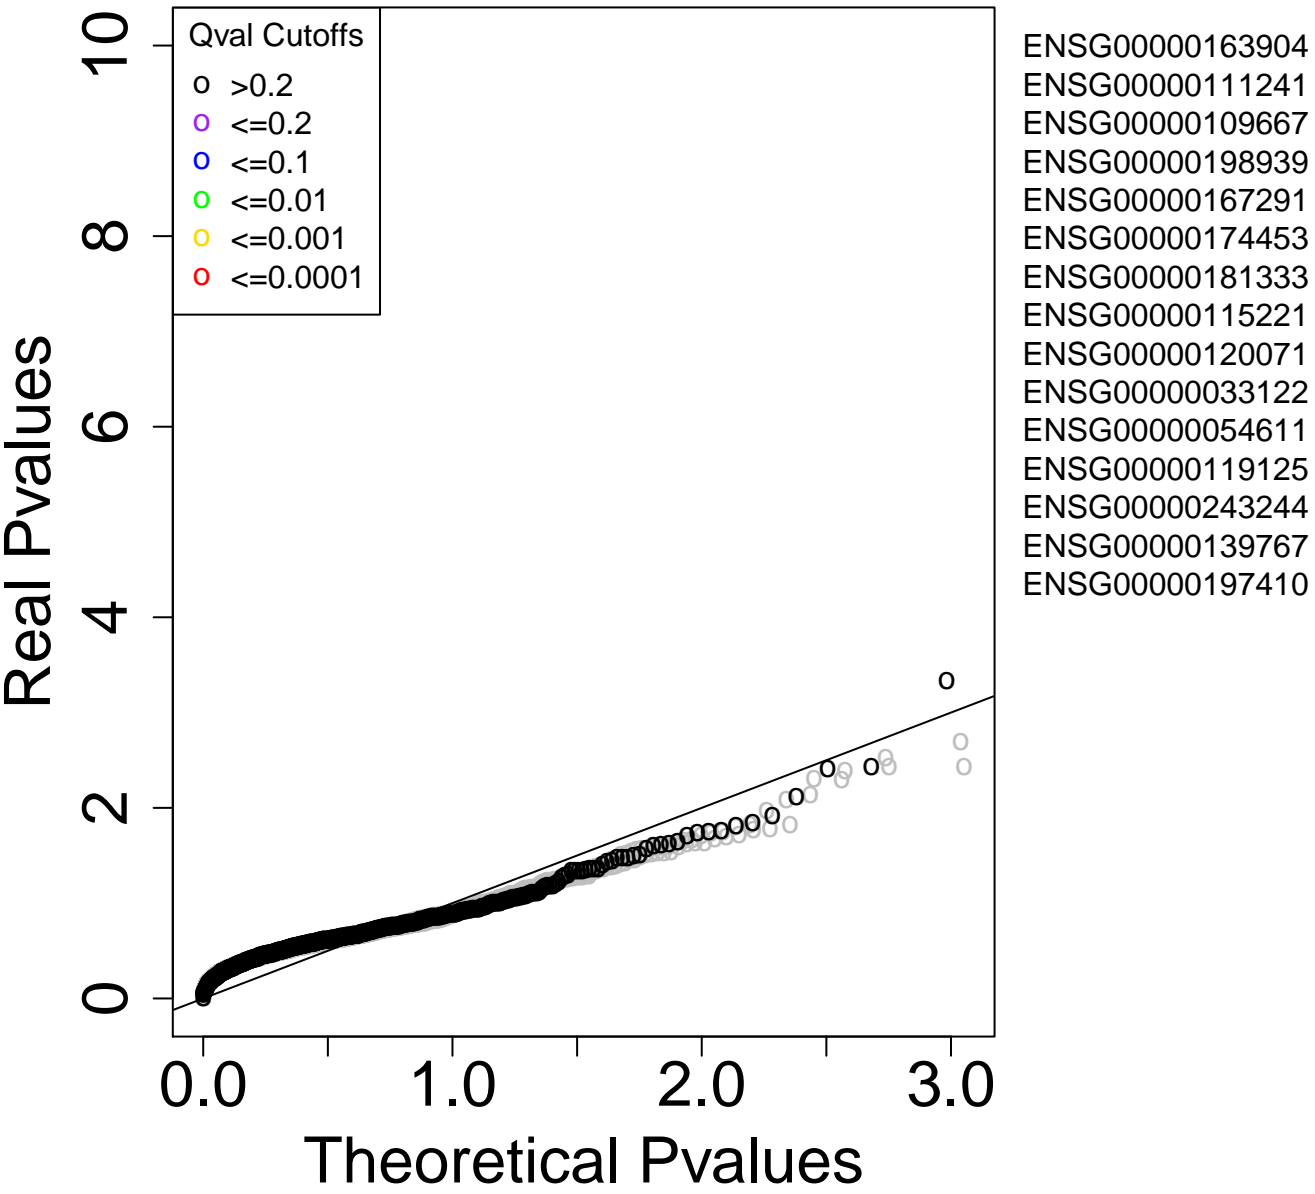



# oding Pilocytic\_astrocytoma – 29 genes

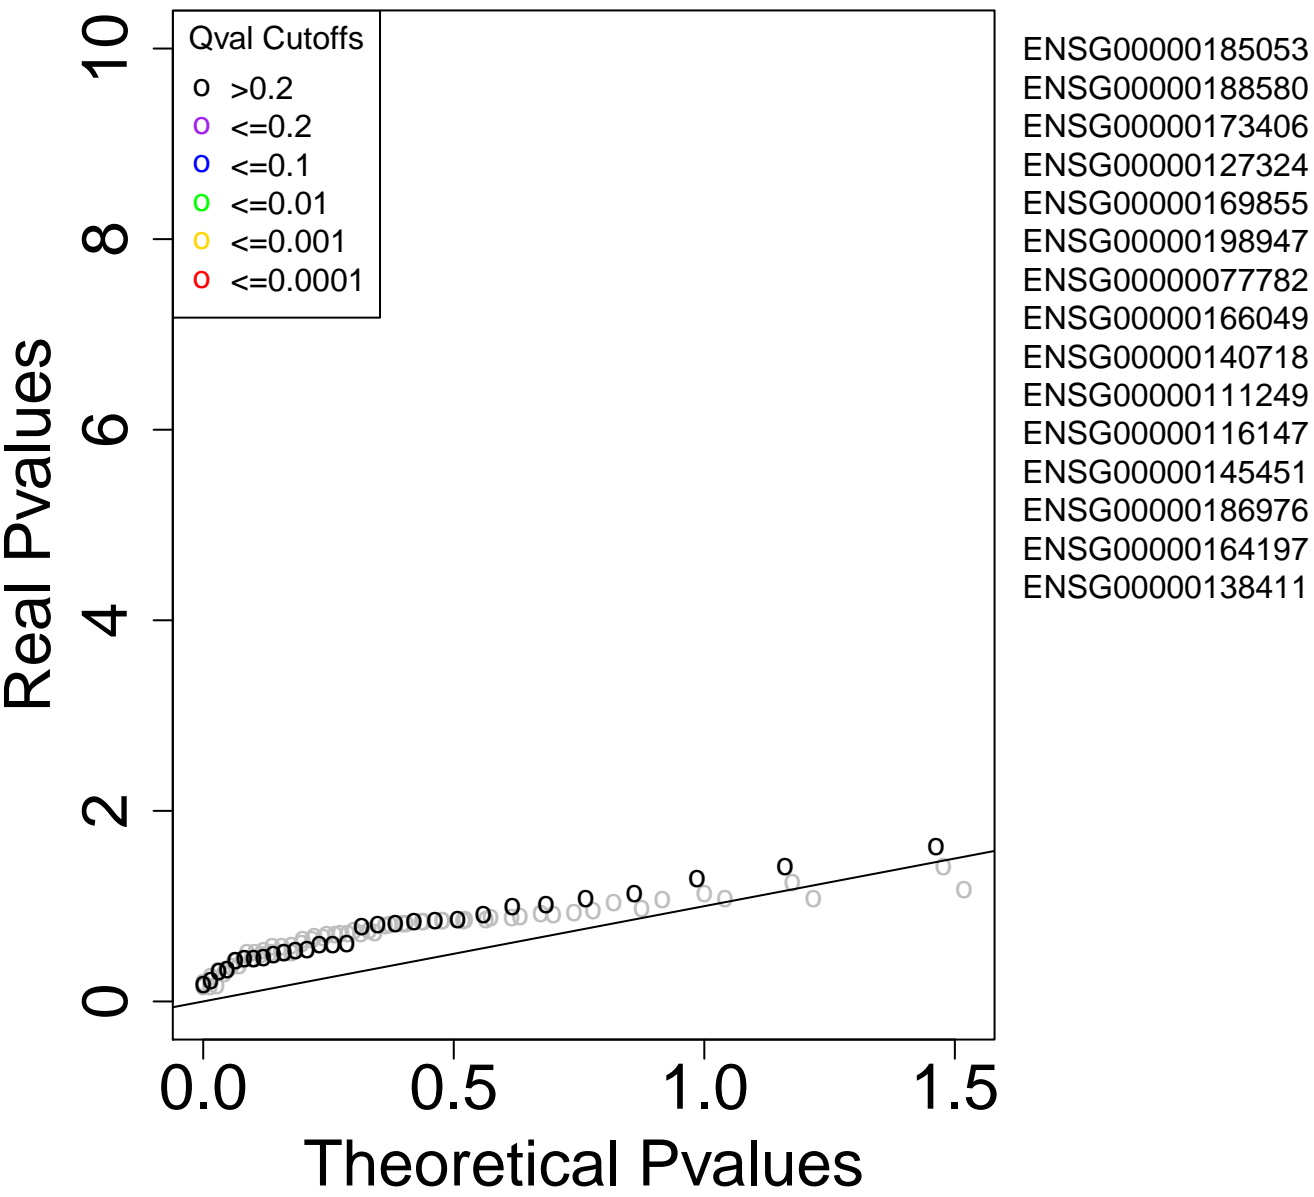

# Coding PRAD – 80 genes

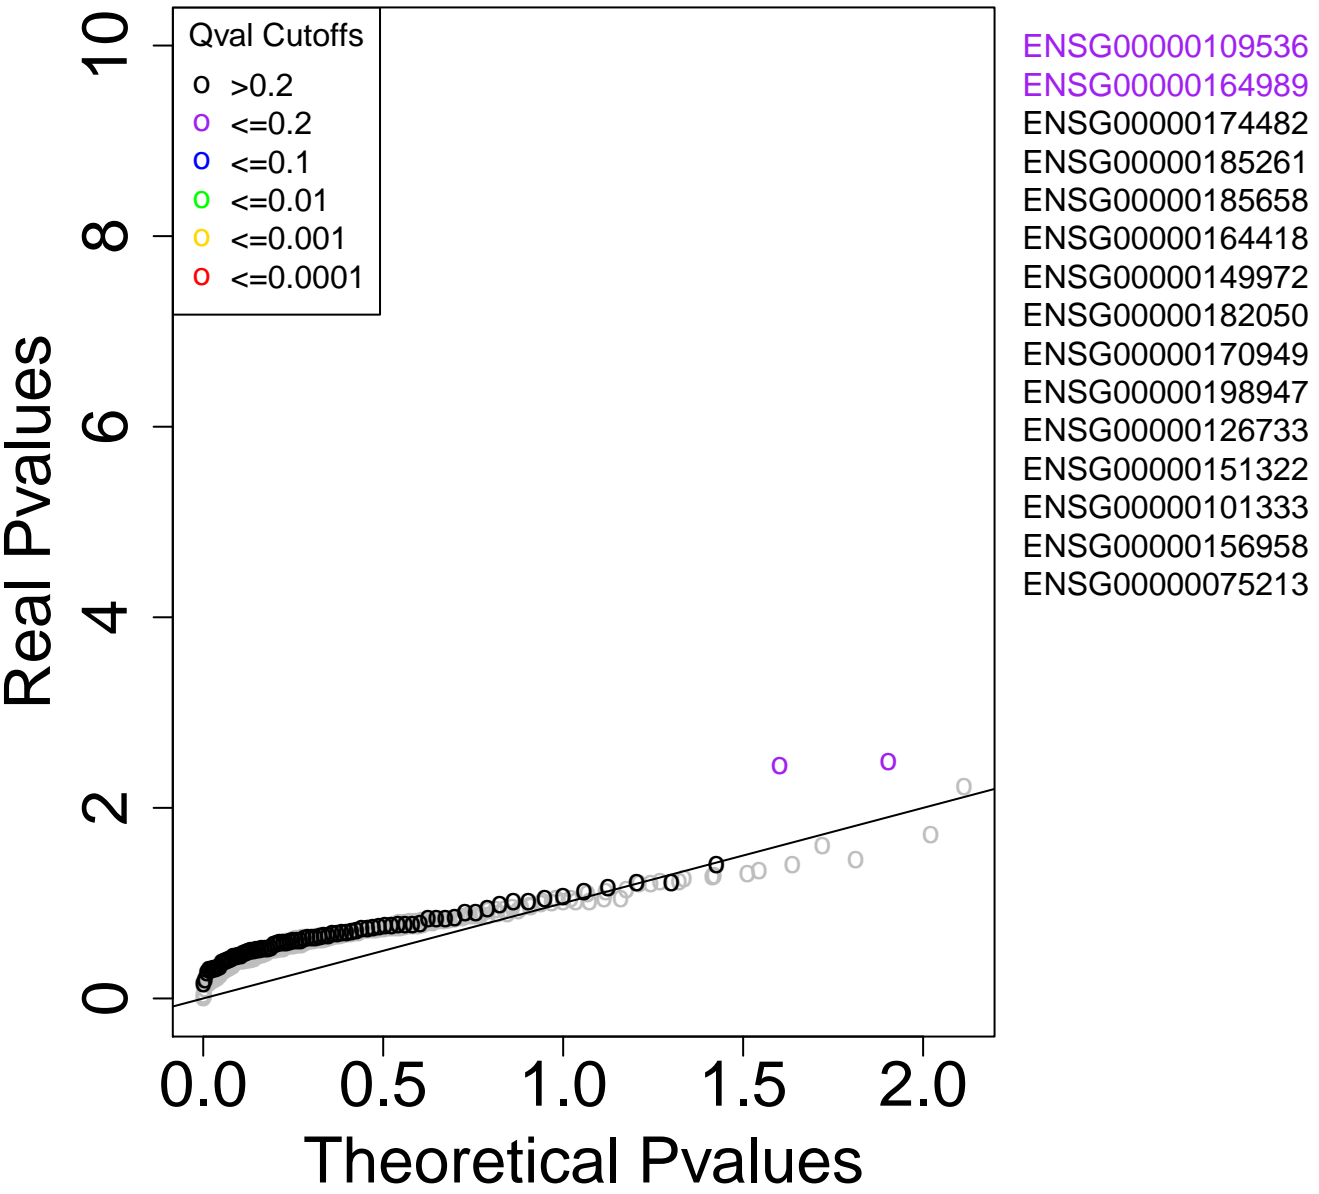

# Coding SKCM – 14721 genes

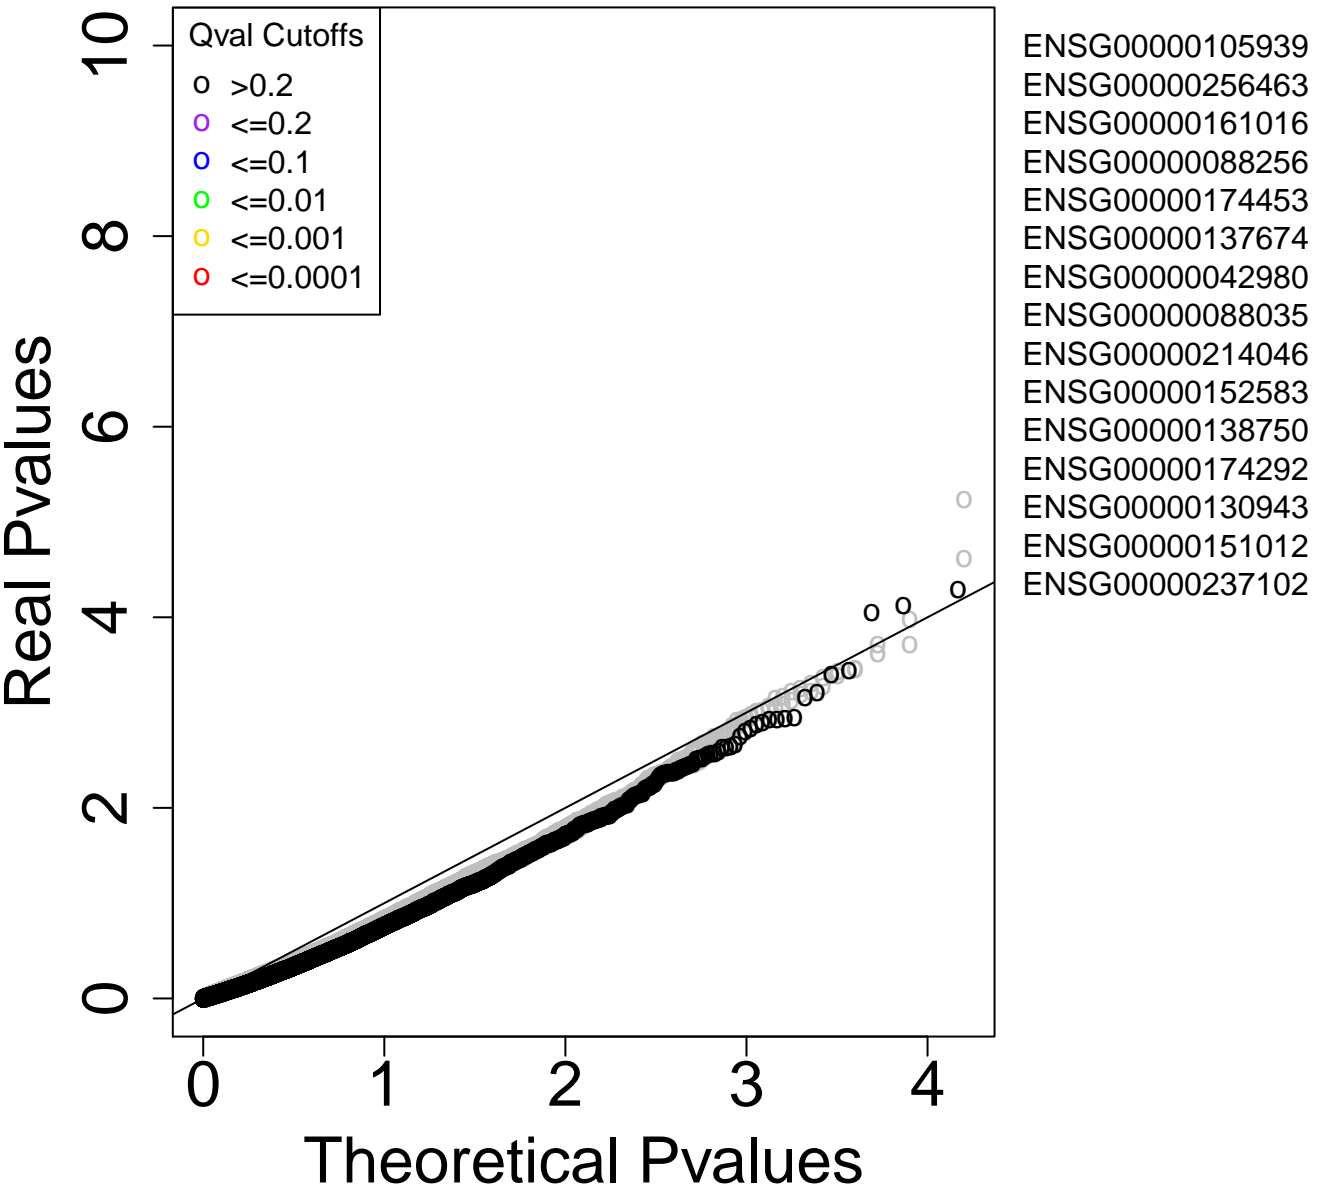

# Coding Stad – 15662 genes

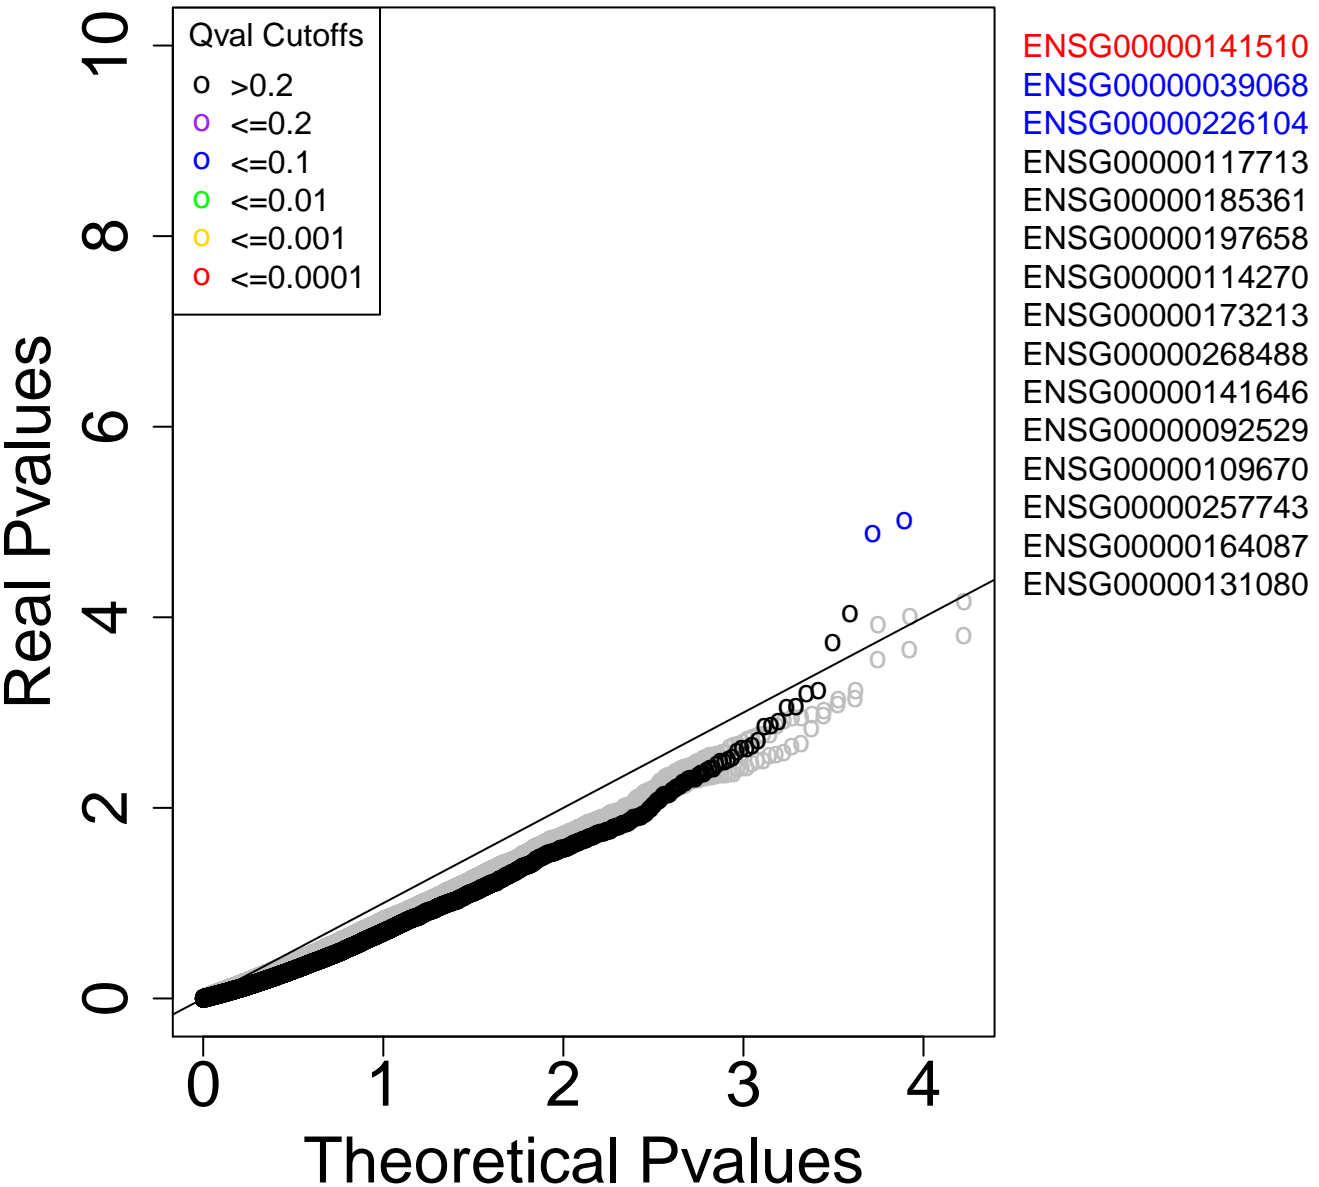

# Coding Superpancancer – 19594 genes

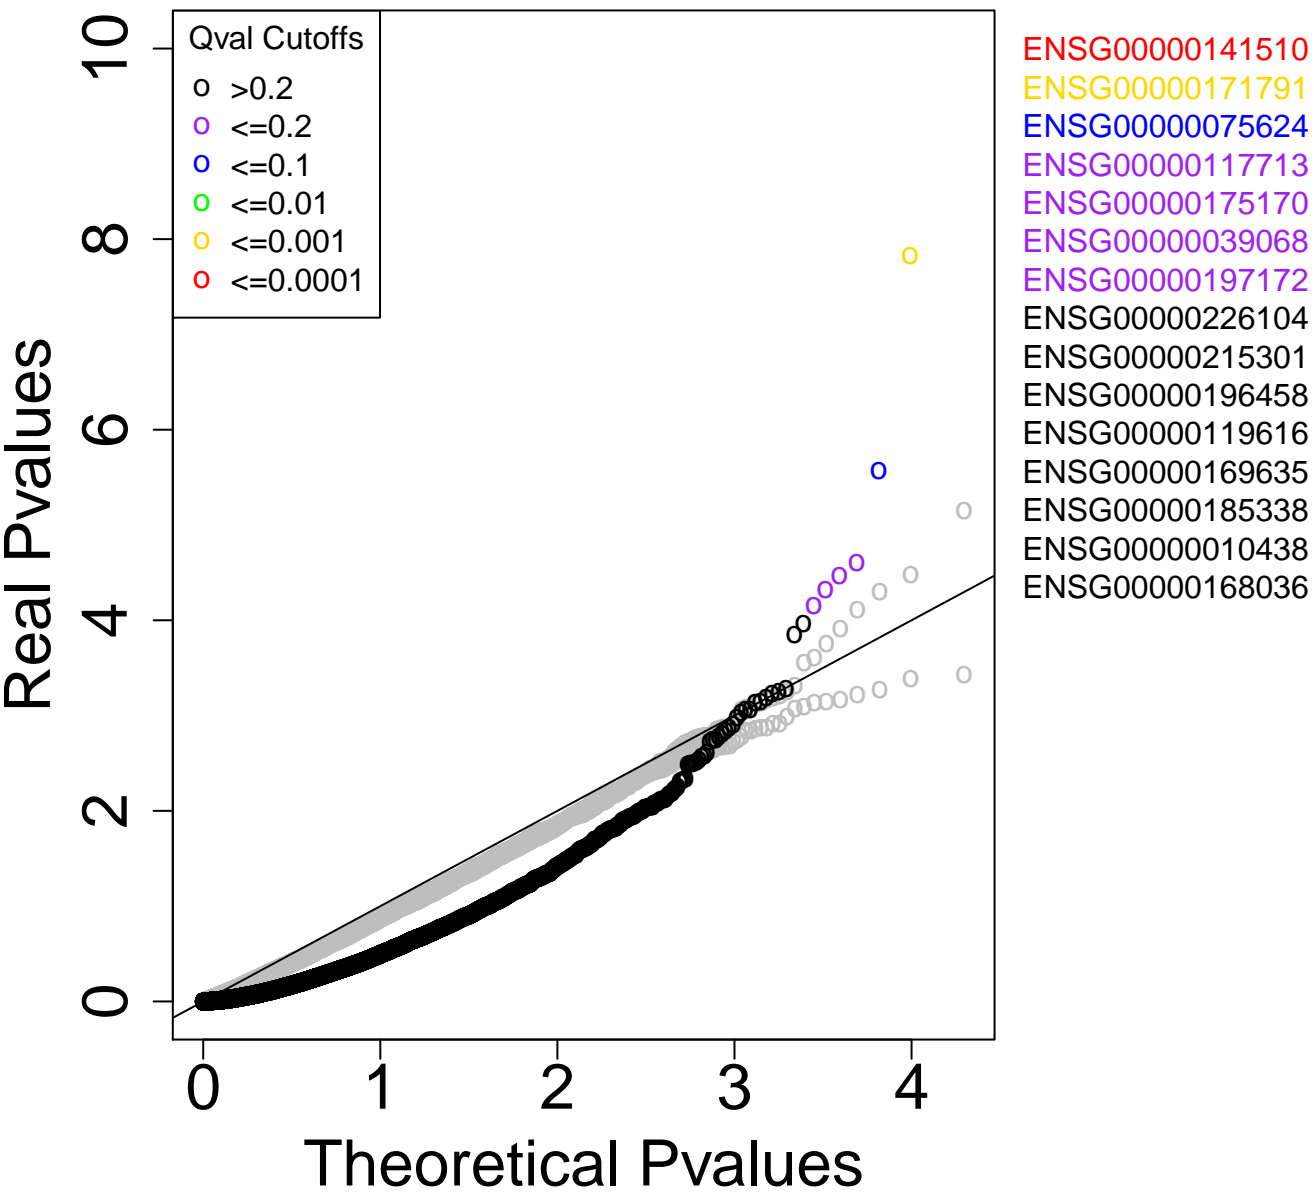

# Coding THCA – 214 genes

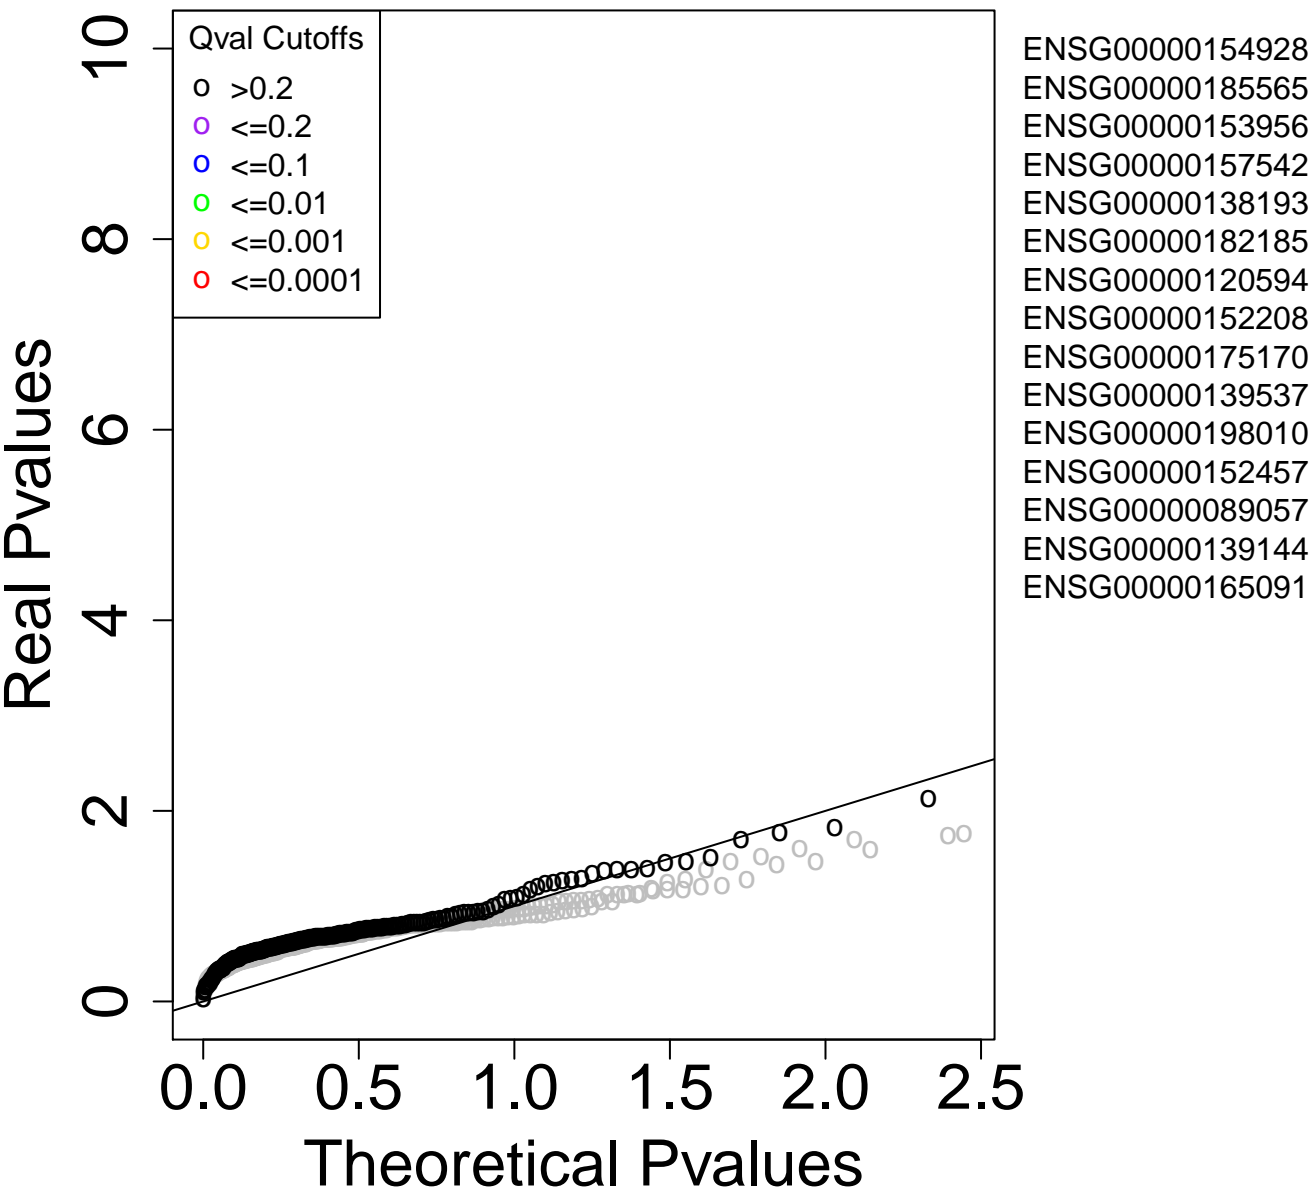

# Coding UCEC – 14611 genes

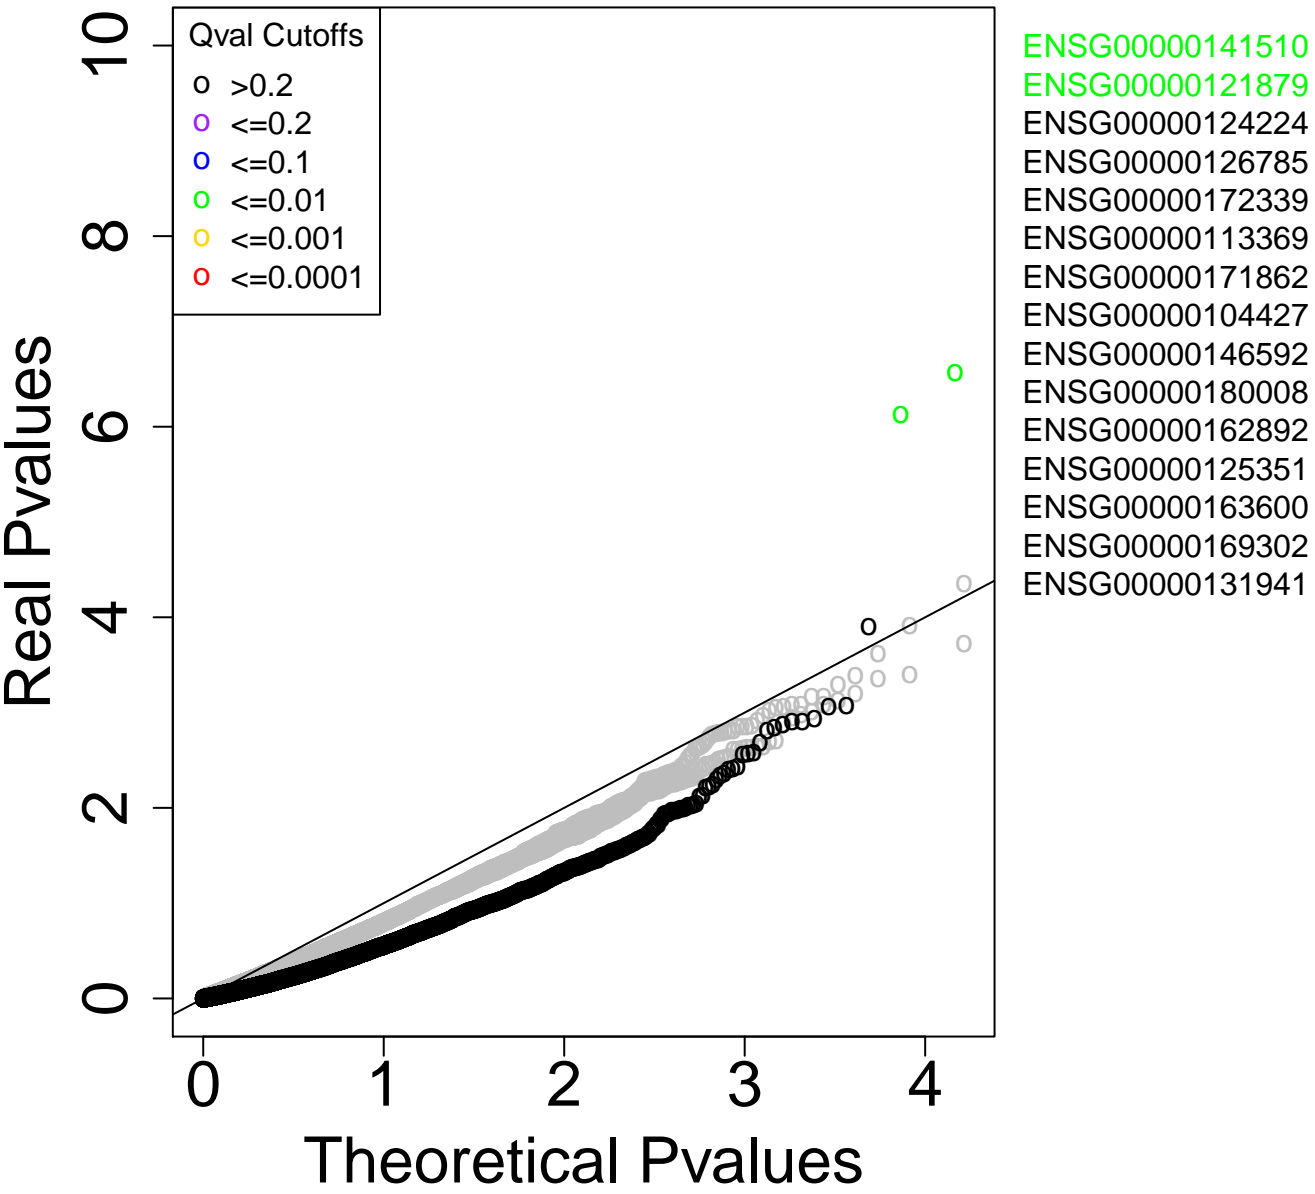

# LncRNA BLCA – 637 genes

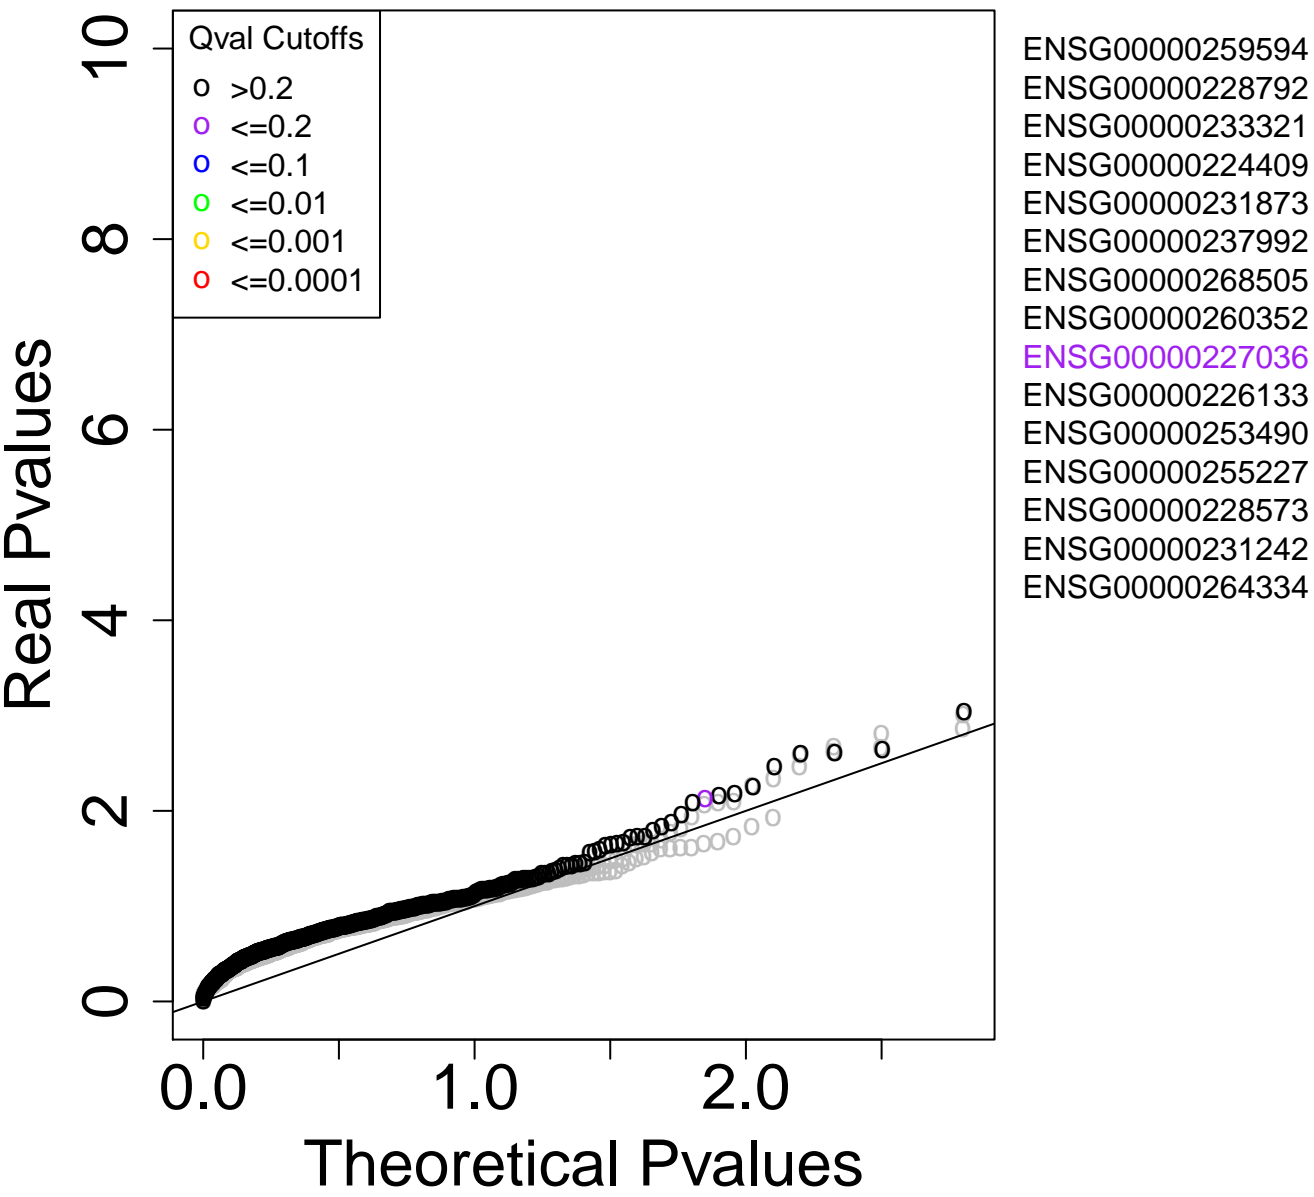



# LncRNA BRCA – 985 genes

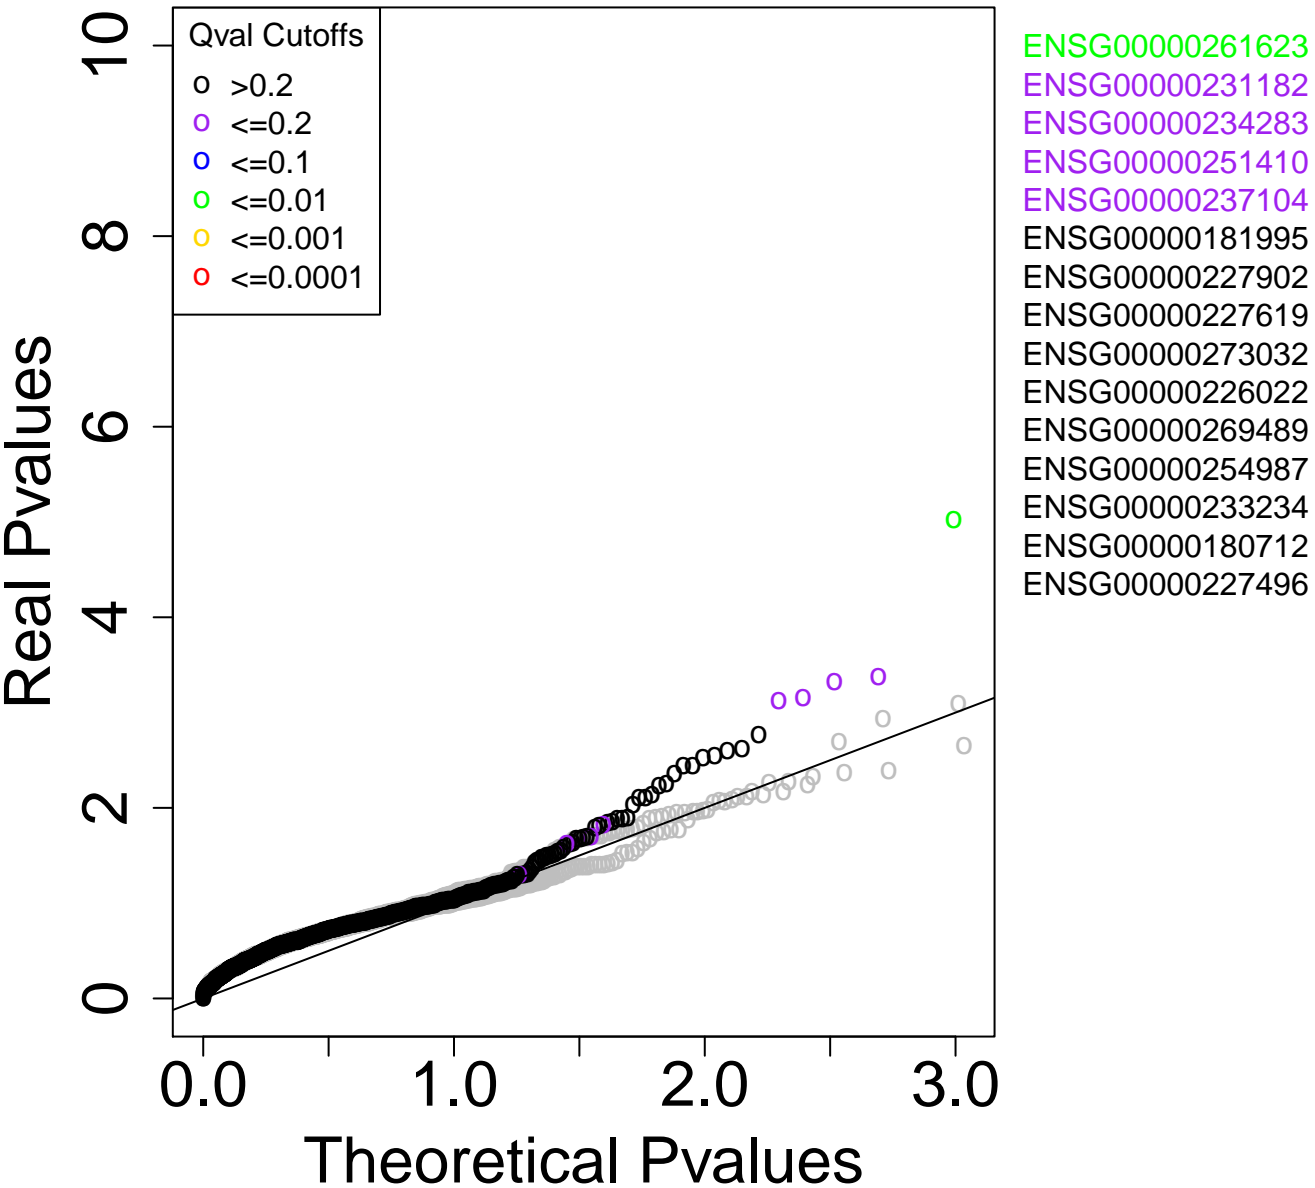

# LncRNA Breast – 1169 genes

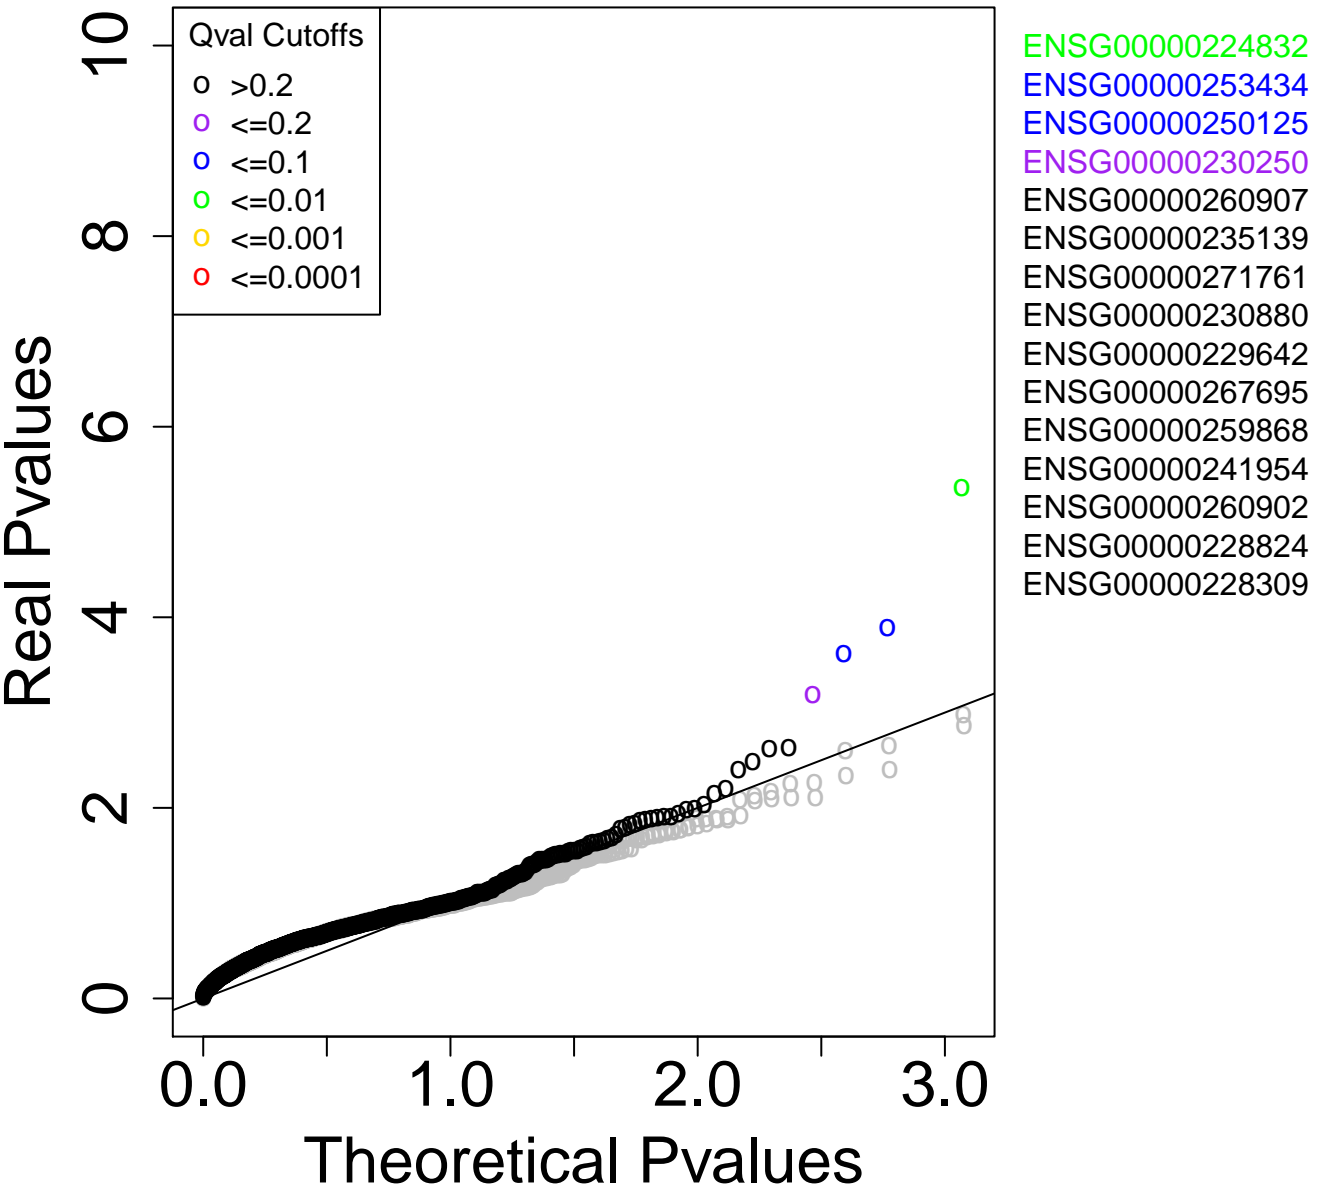

# LncRNA CLL – 34 genes

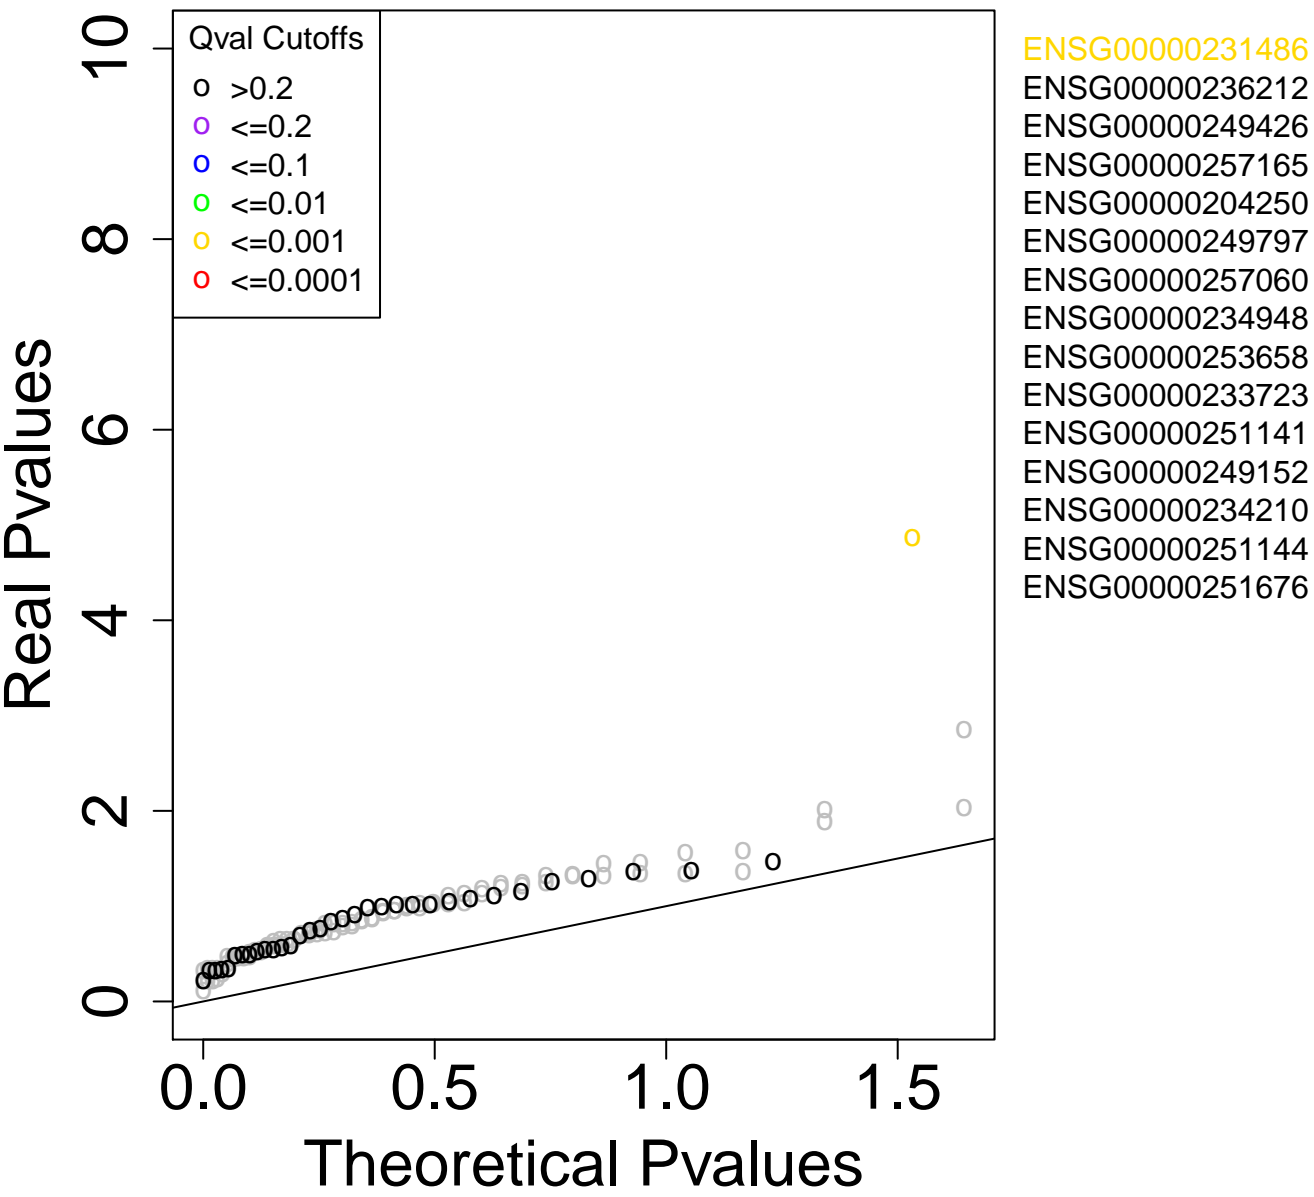

# LncRNA CRC – 3750 genes

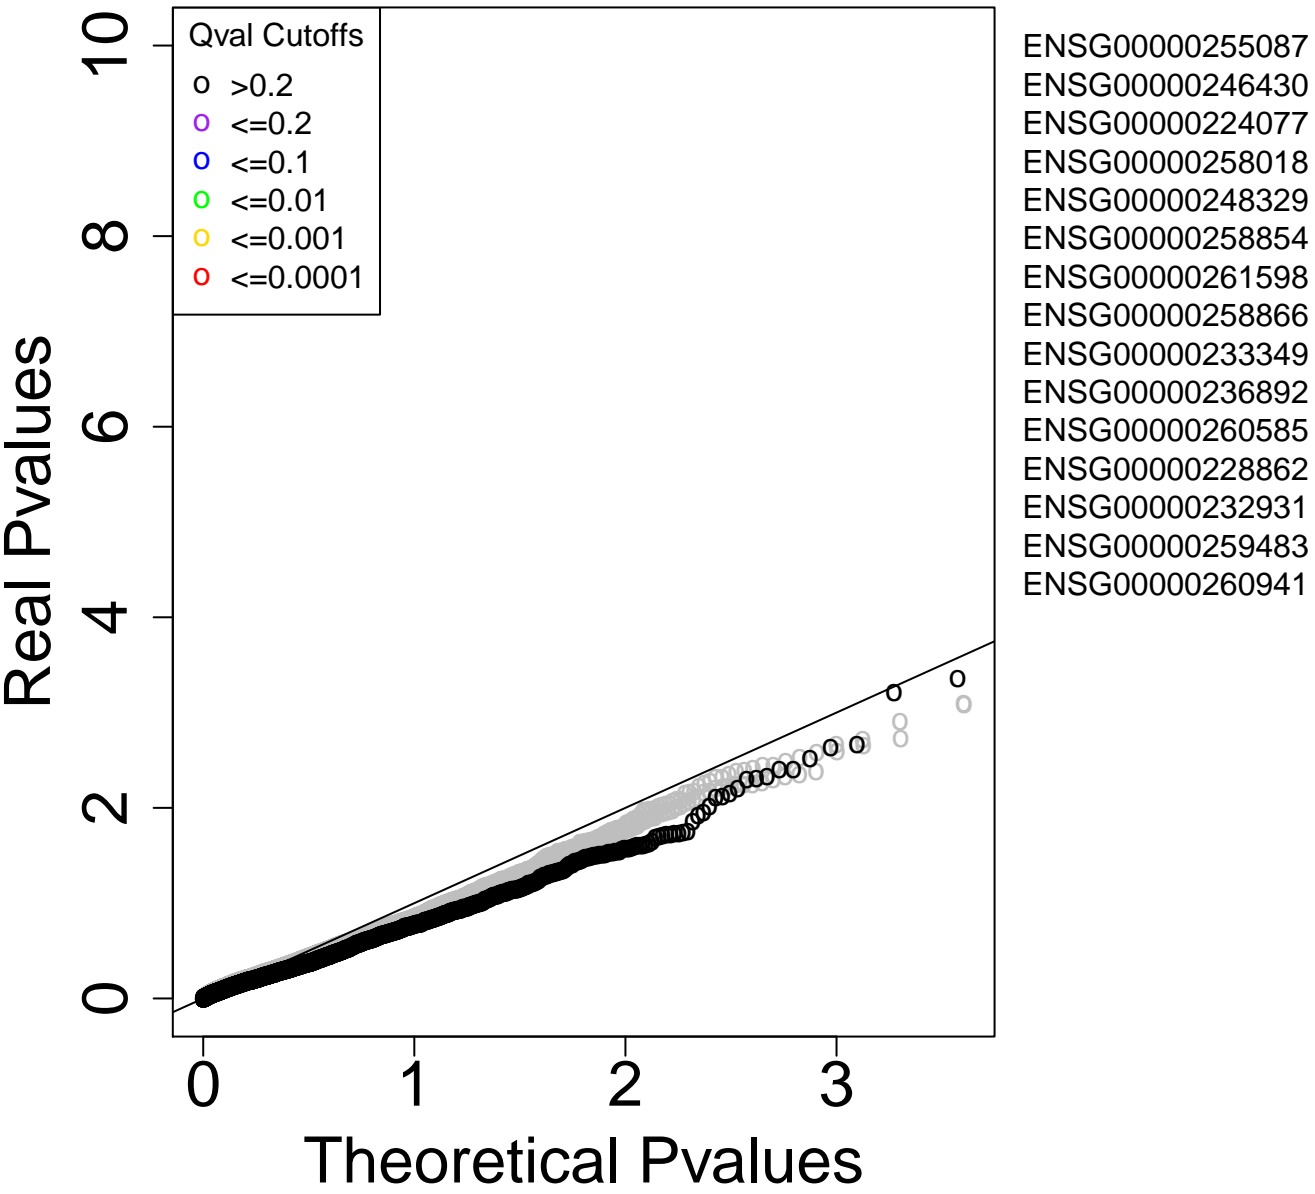

# LncRNA GBM – 202 genes

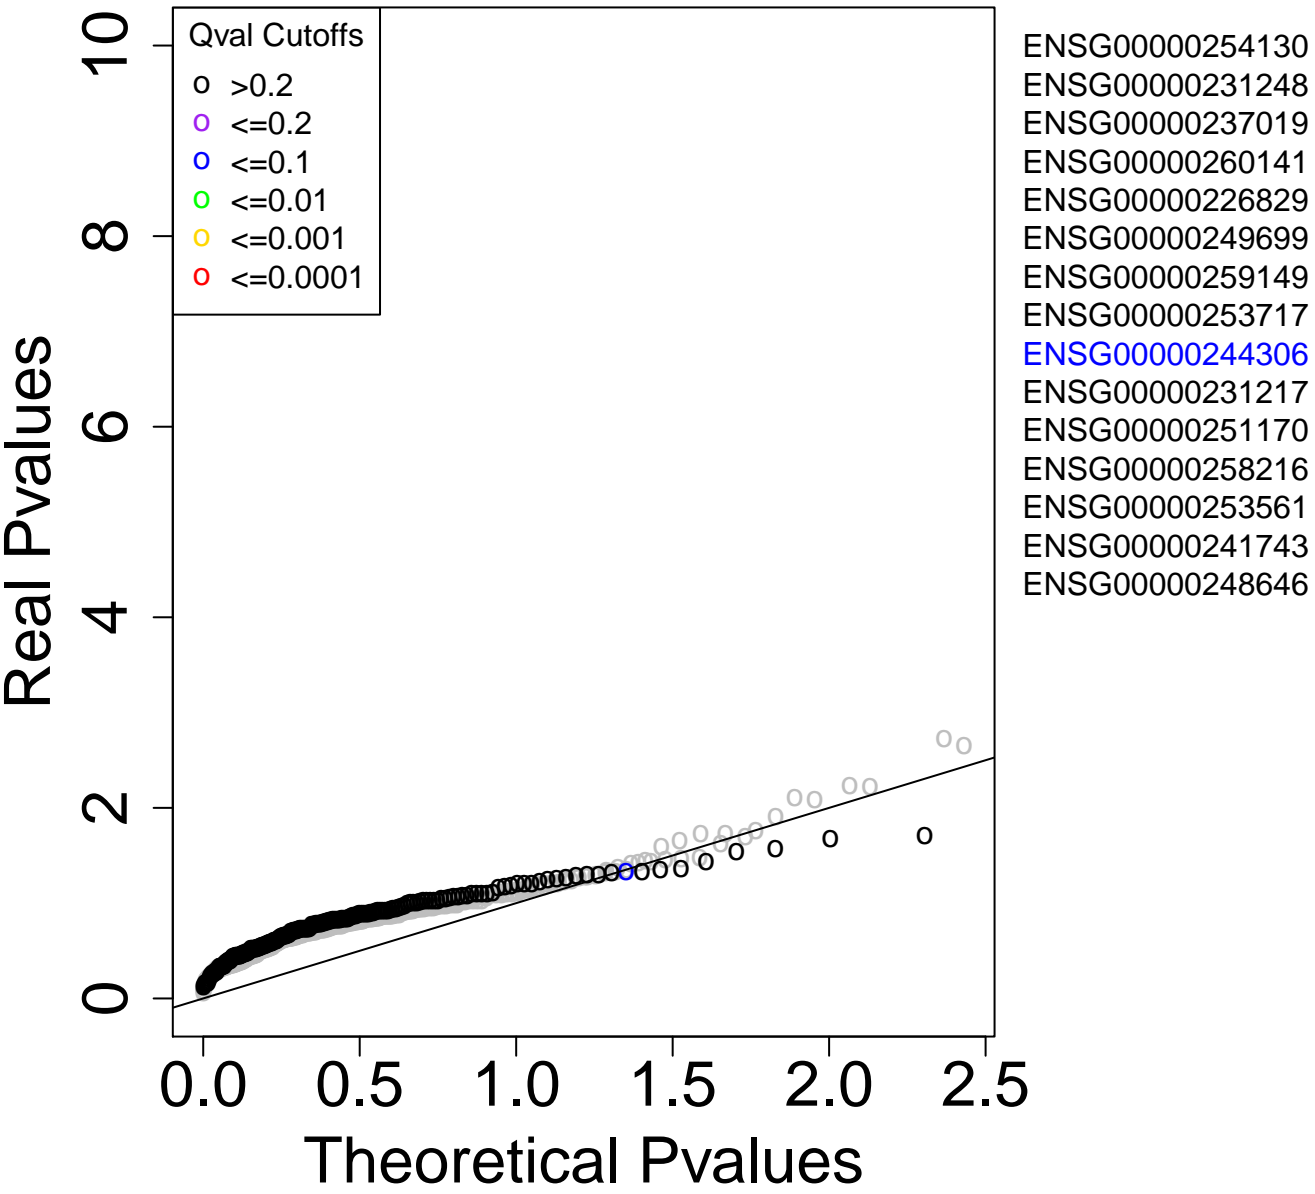

# LncRNA HNSC – 450 genes

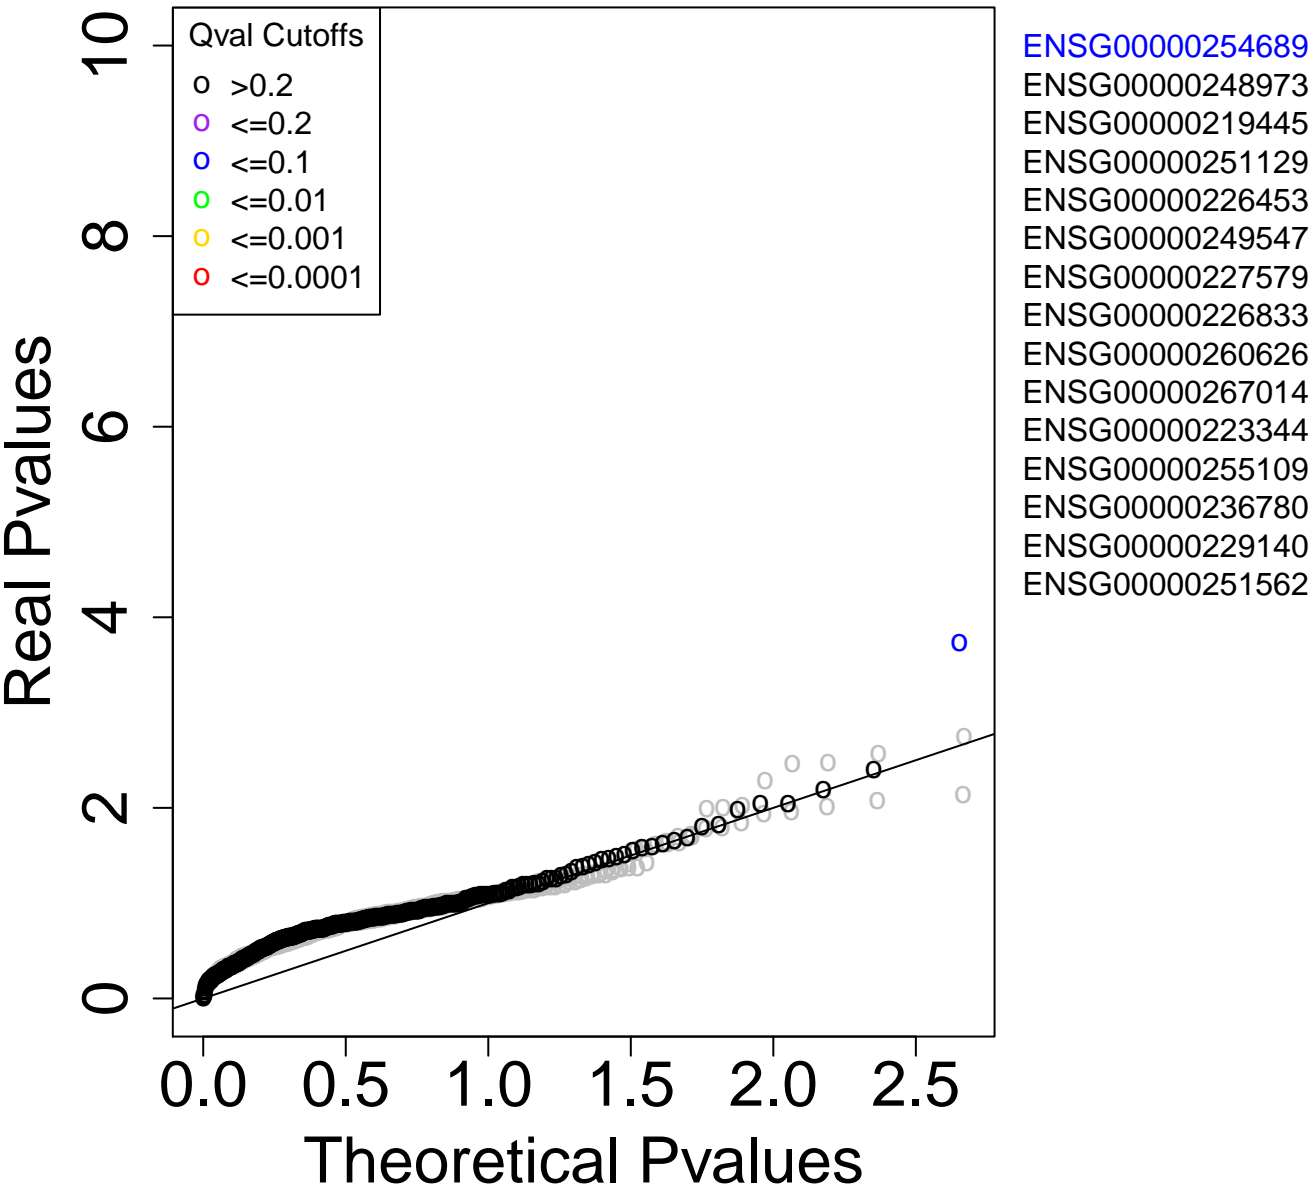

# LncRNA KICH – 9 genes

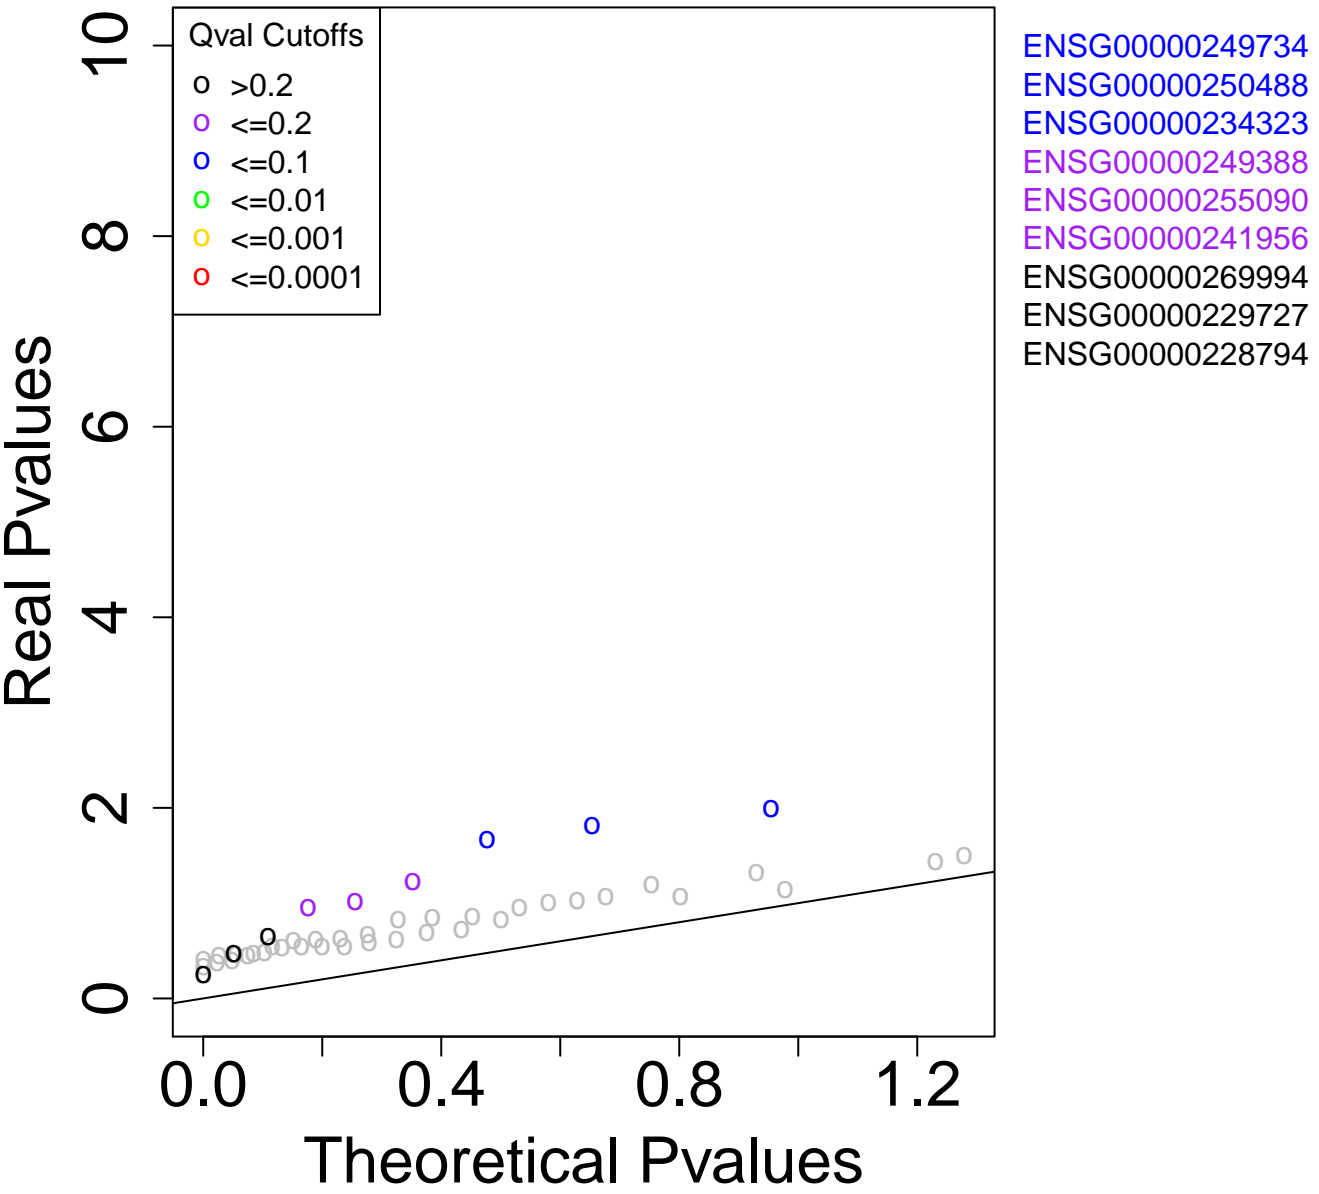

# LncRNA KIRC – 146 genes

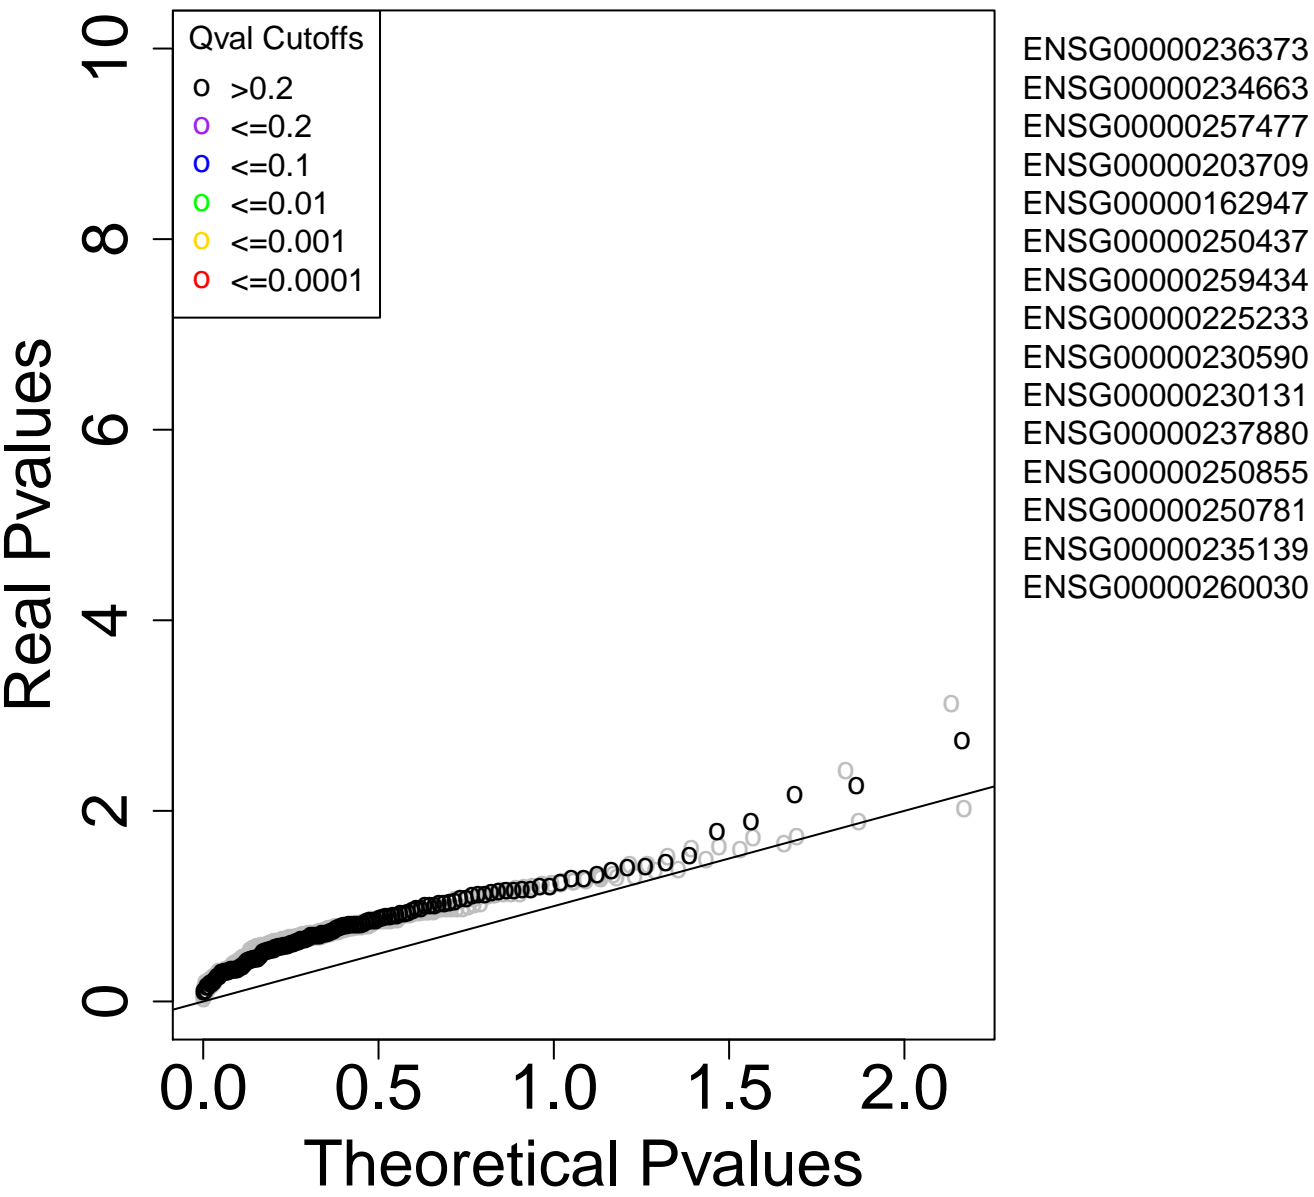



# LncRNA LGG – 23 genes

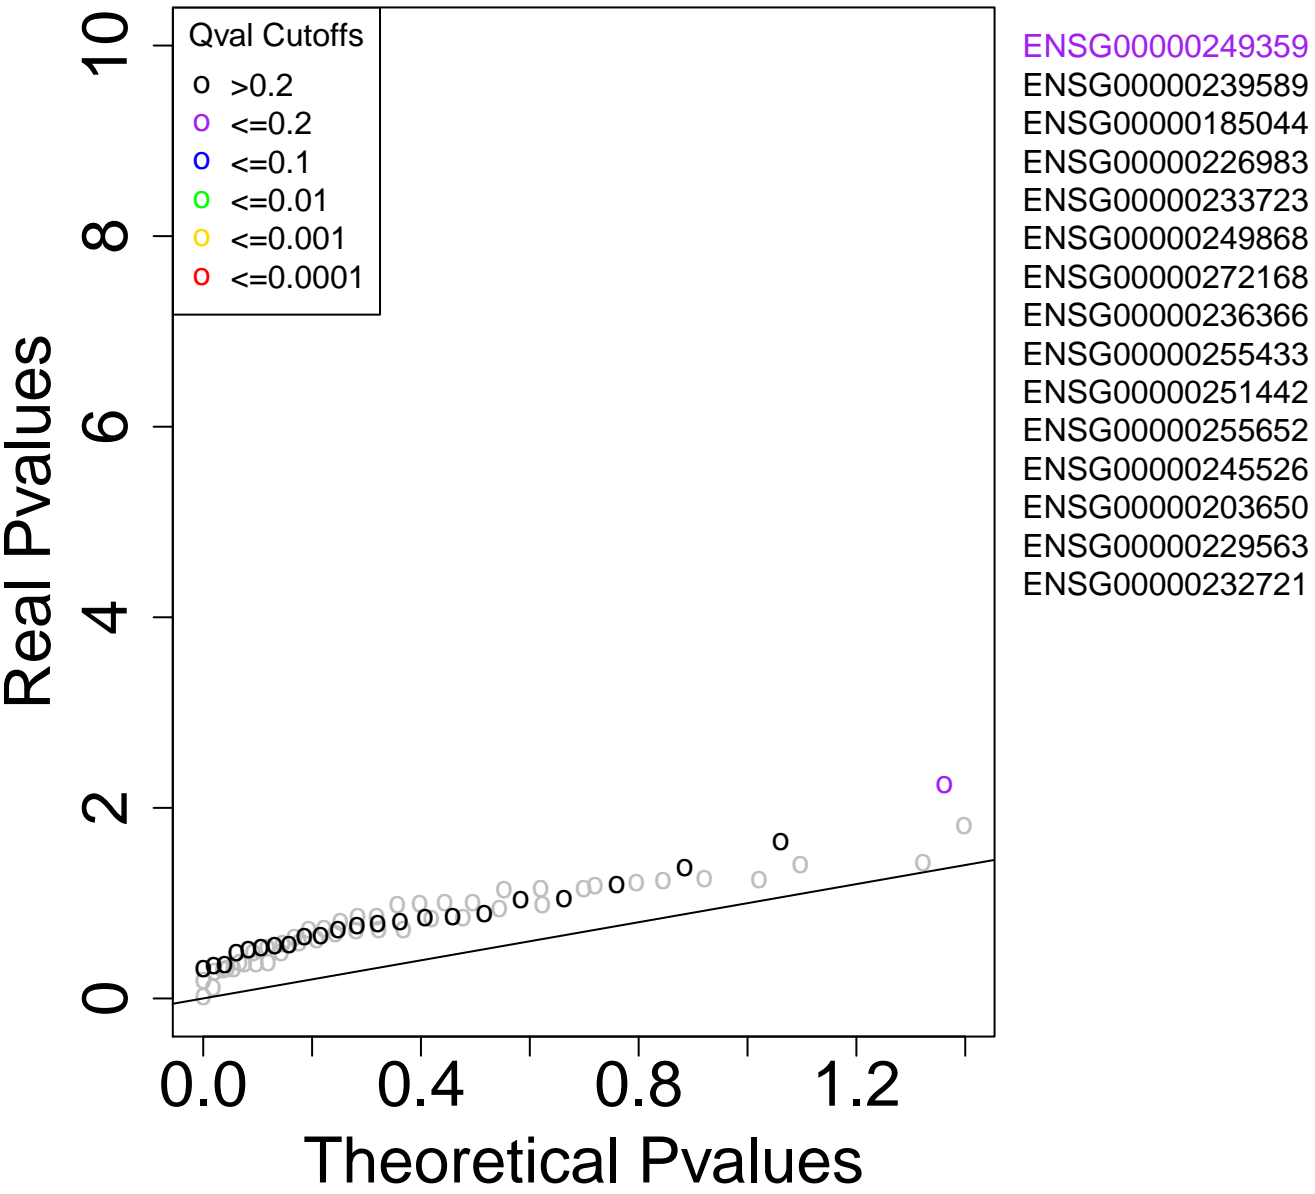

# LncRNA Liver – 1237 genes

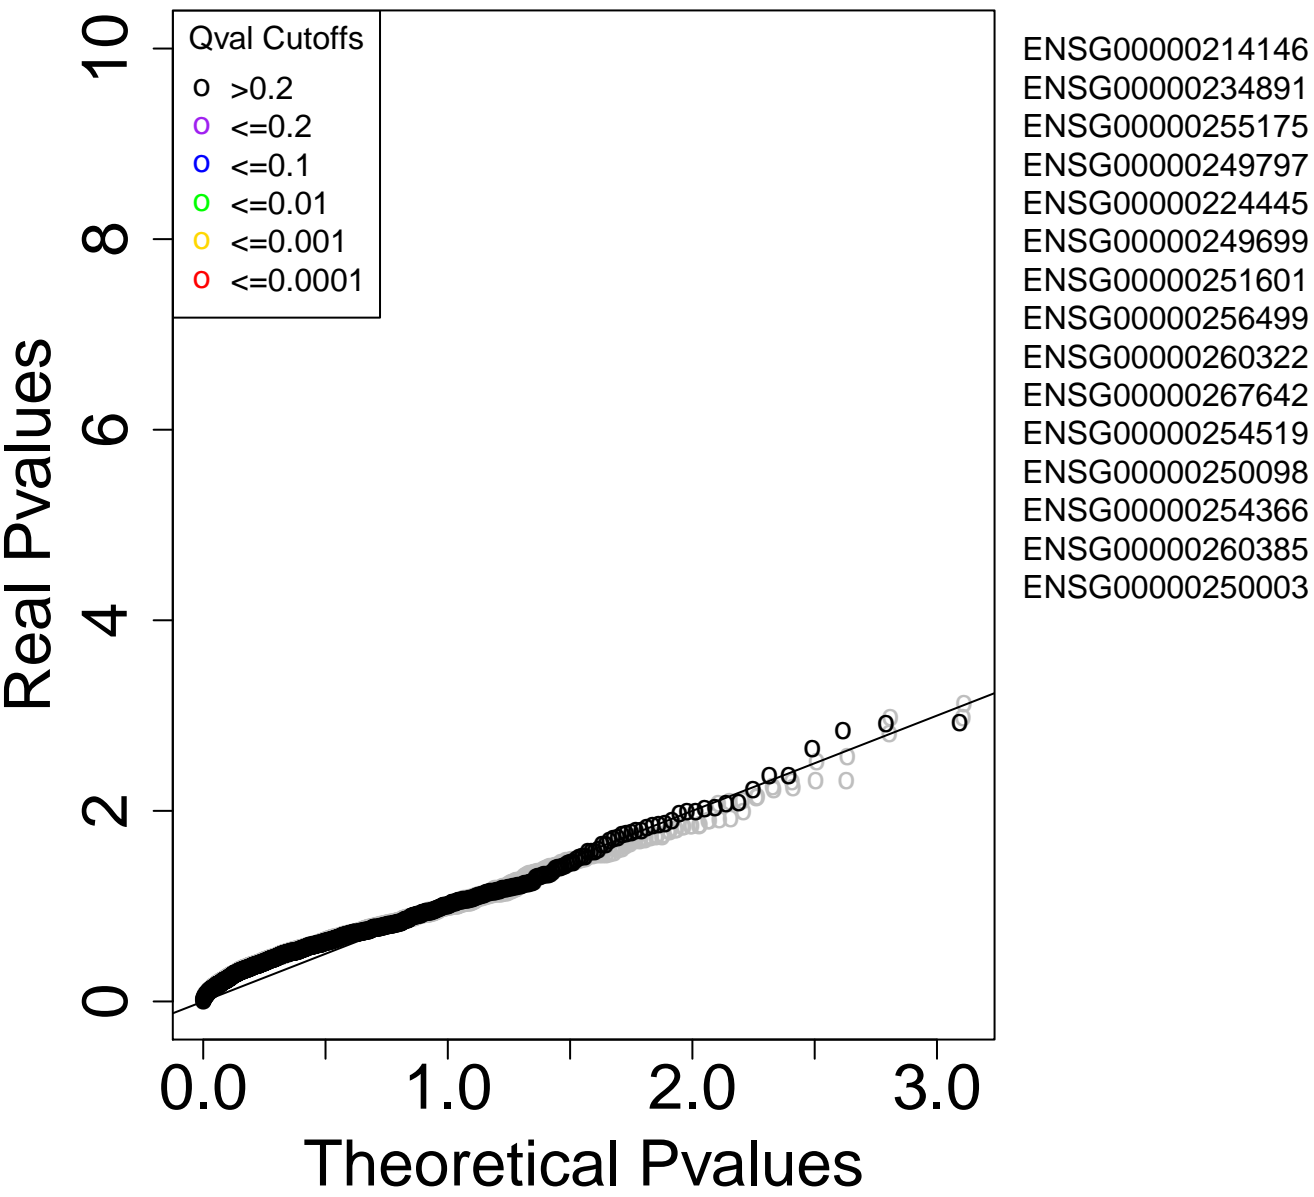

# LncRNA LUAD – 1683 genes

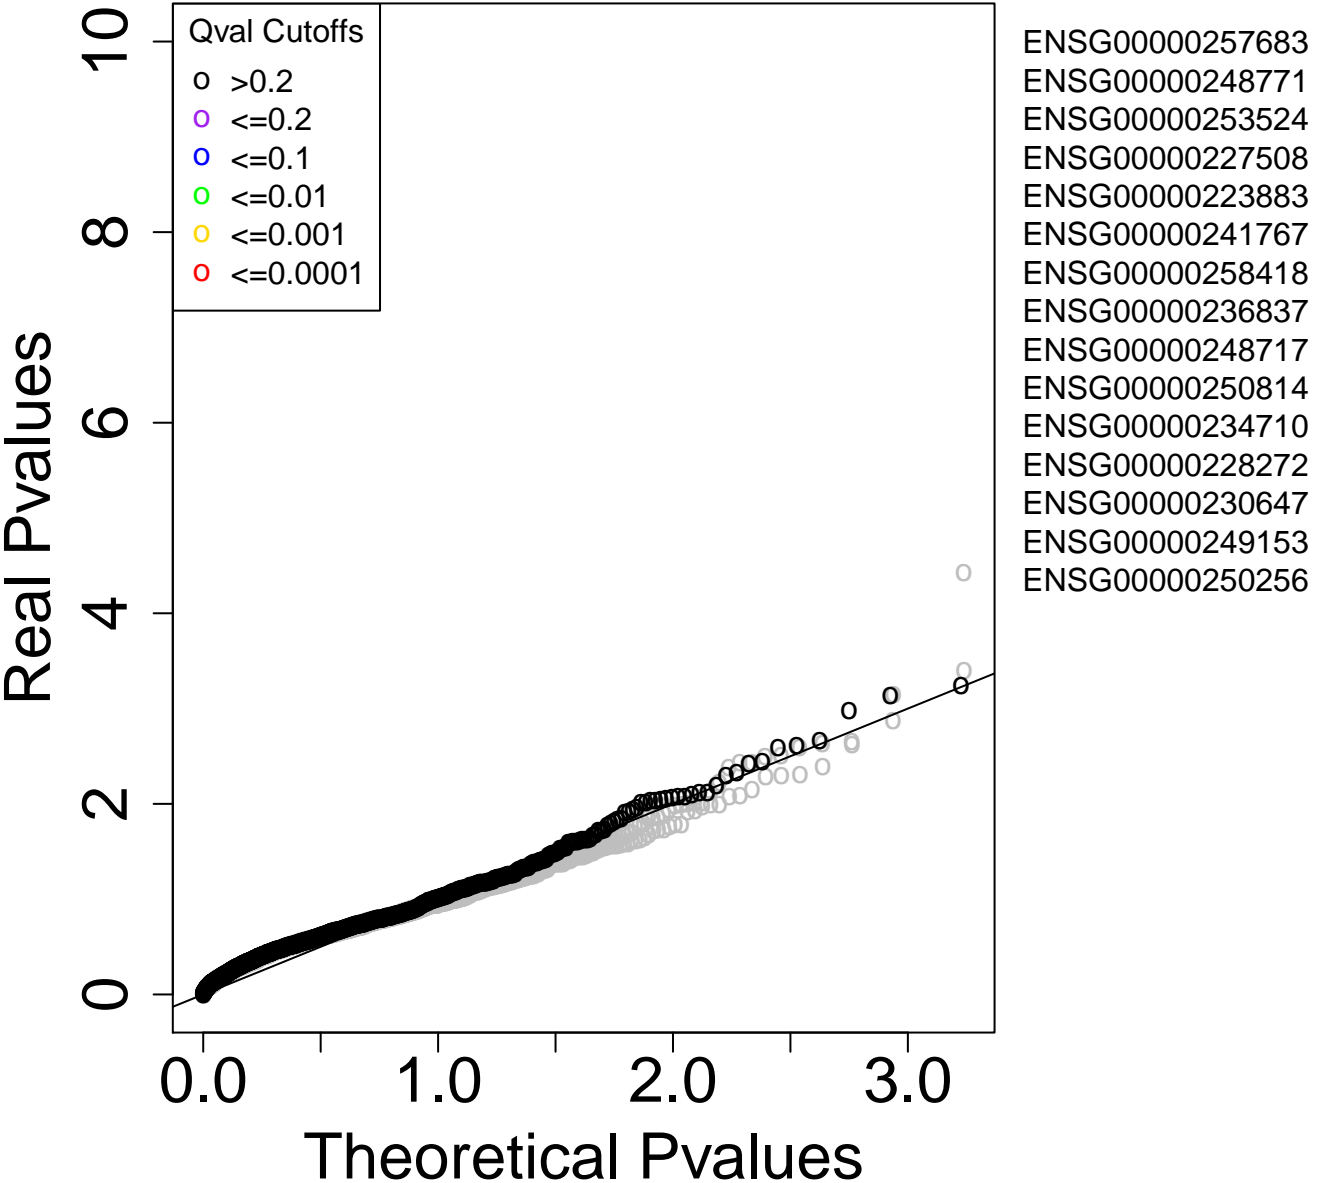

# LncRNA Lung\_adeno – 2073 genes

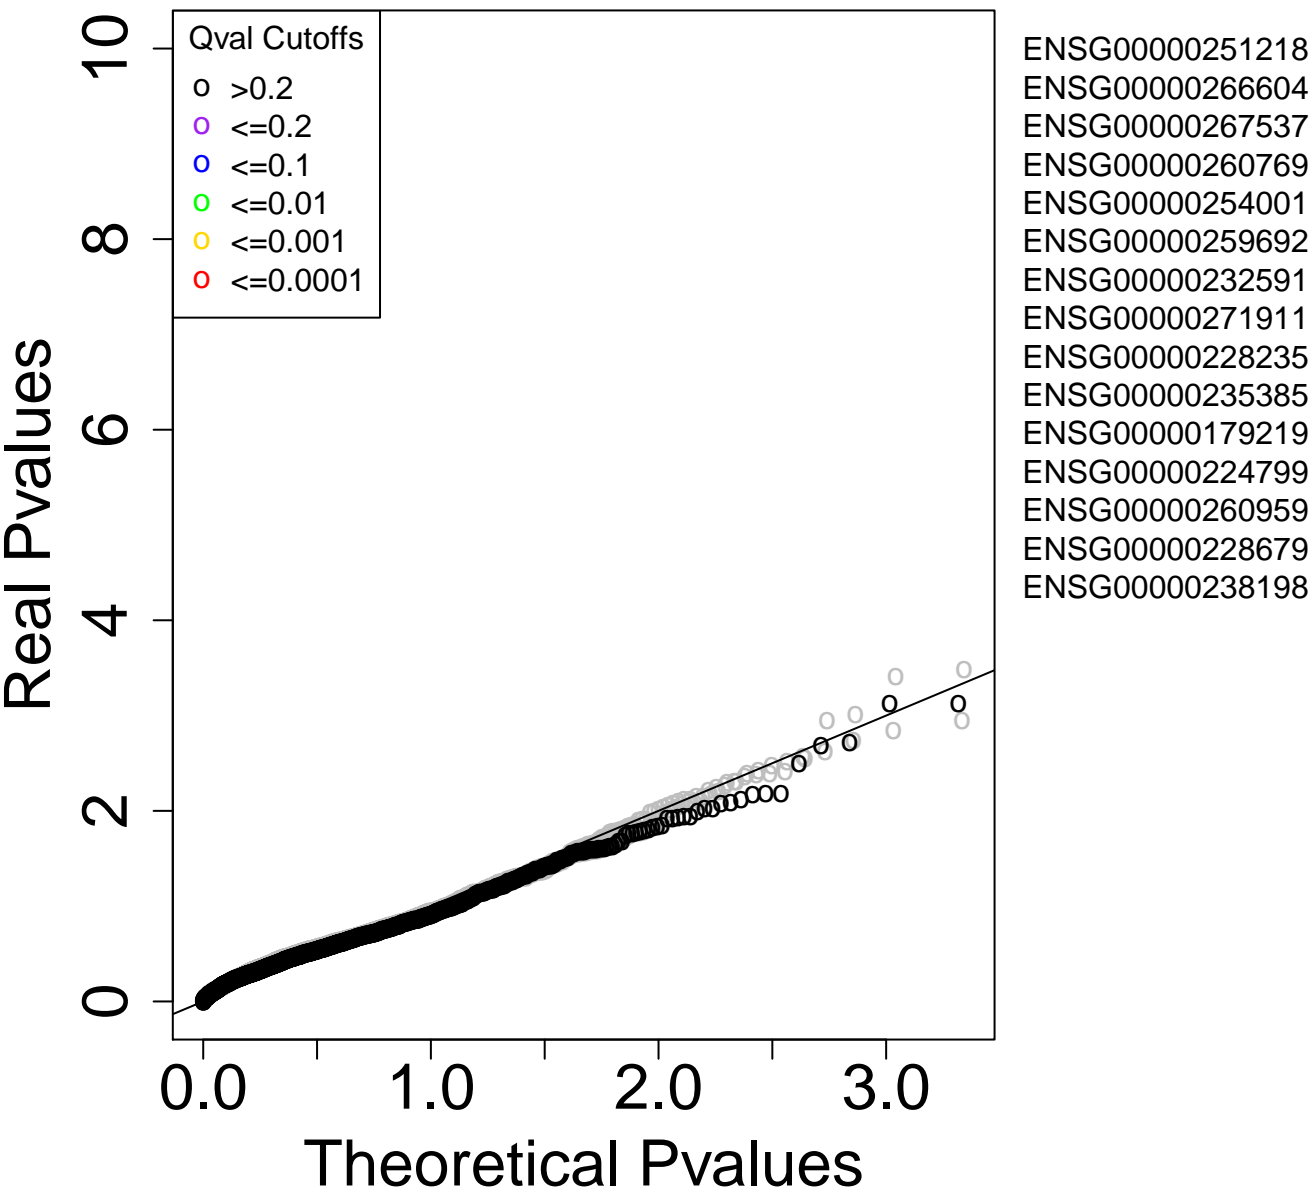

# LncRNA LUSC – 2117 genes

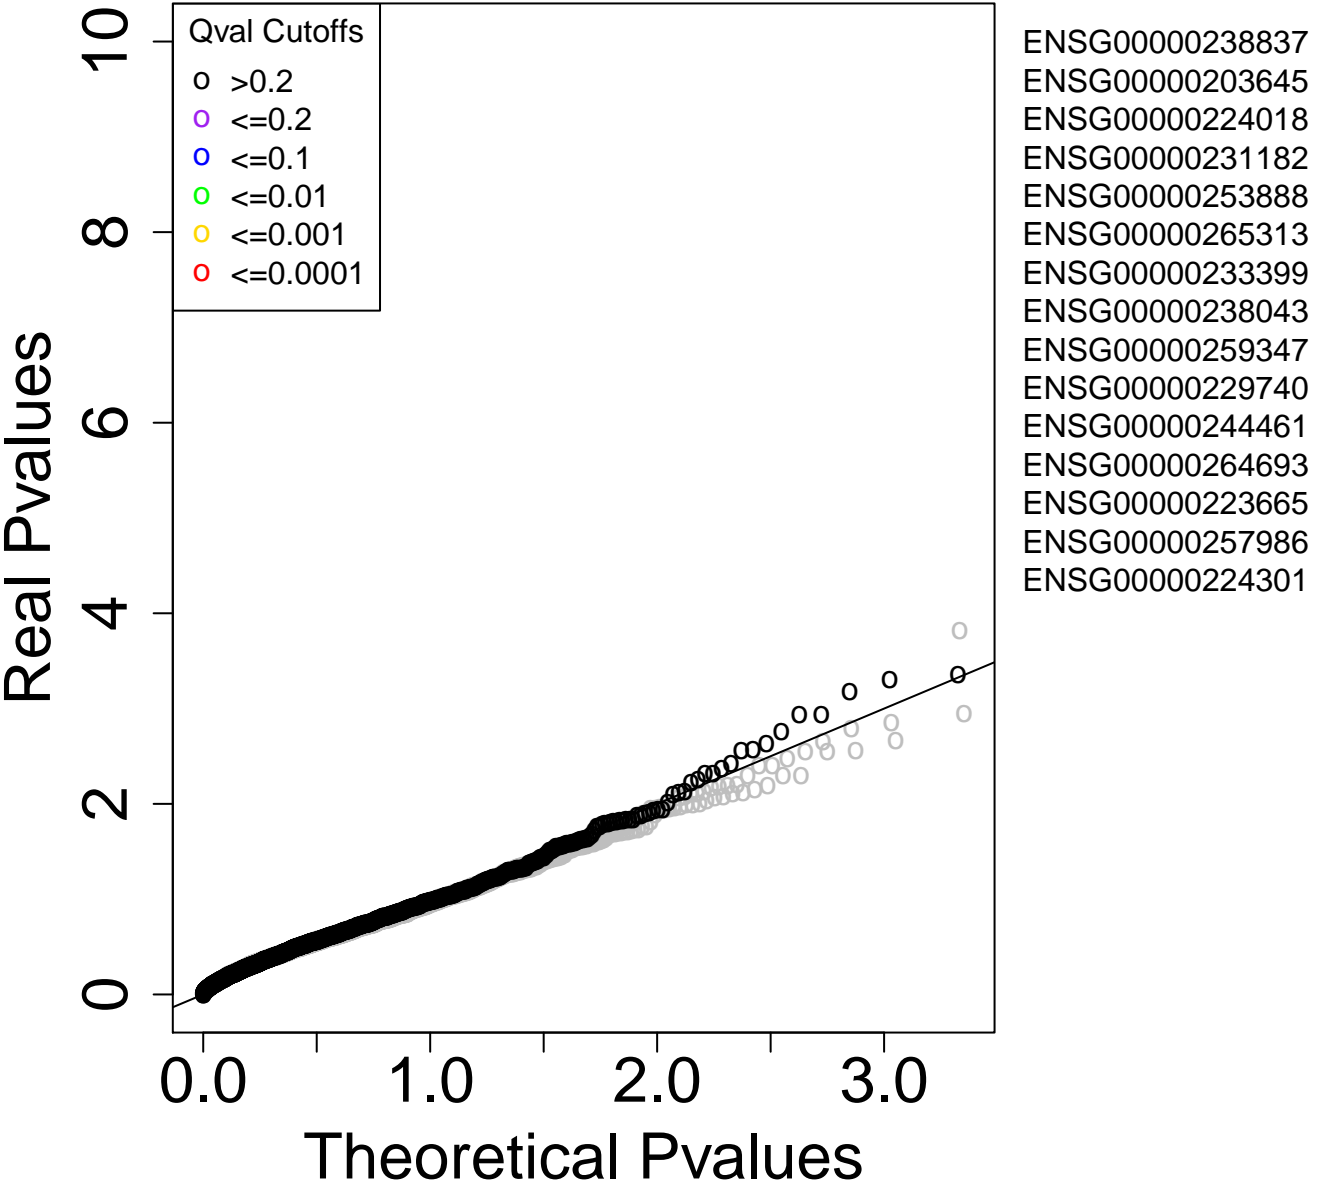

# lncRNA Lymphoma\_B-cell – 136 genes

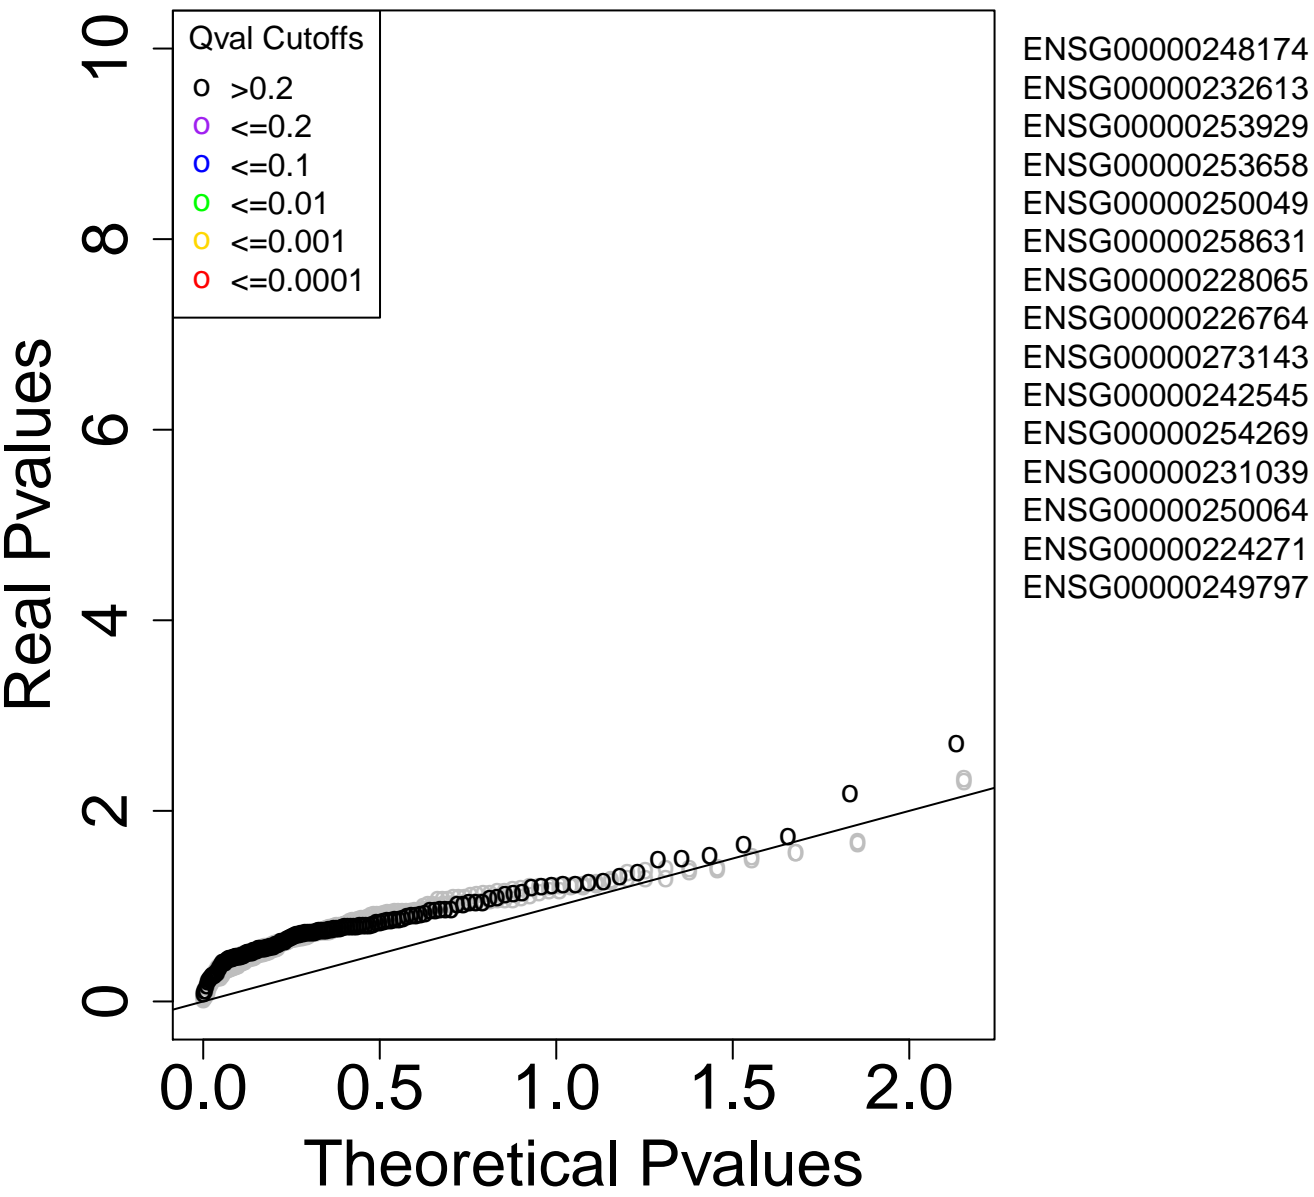

# LncRNA Medulloblastoma – 154 genes

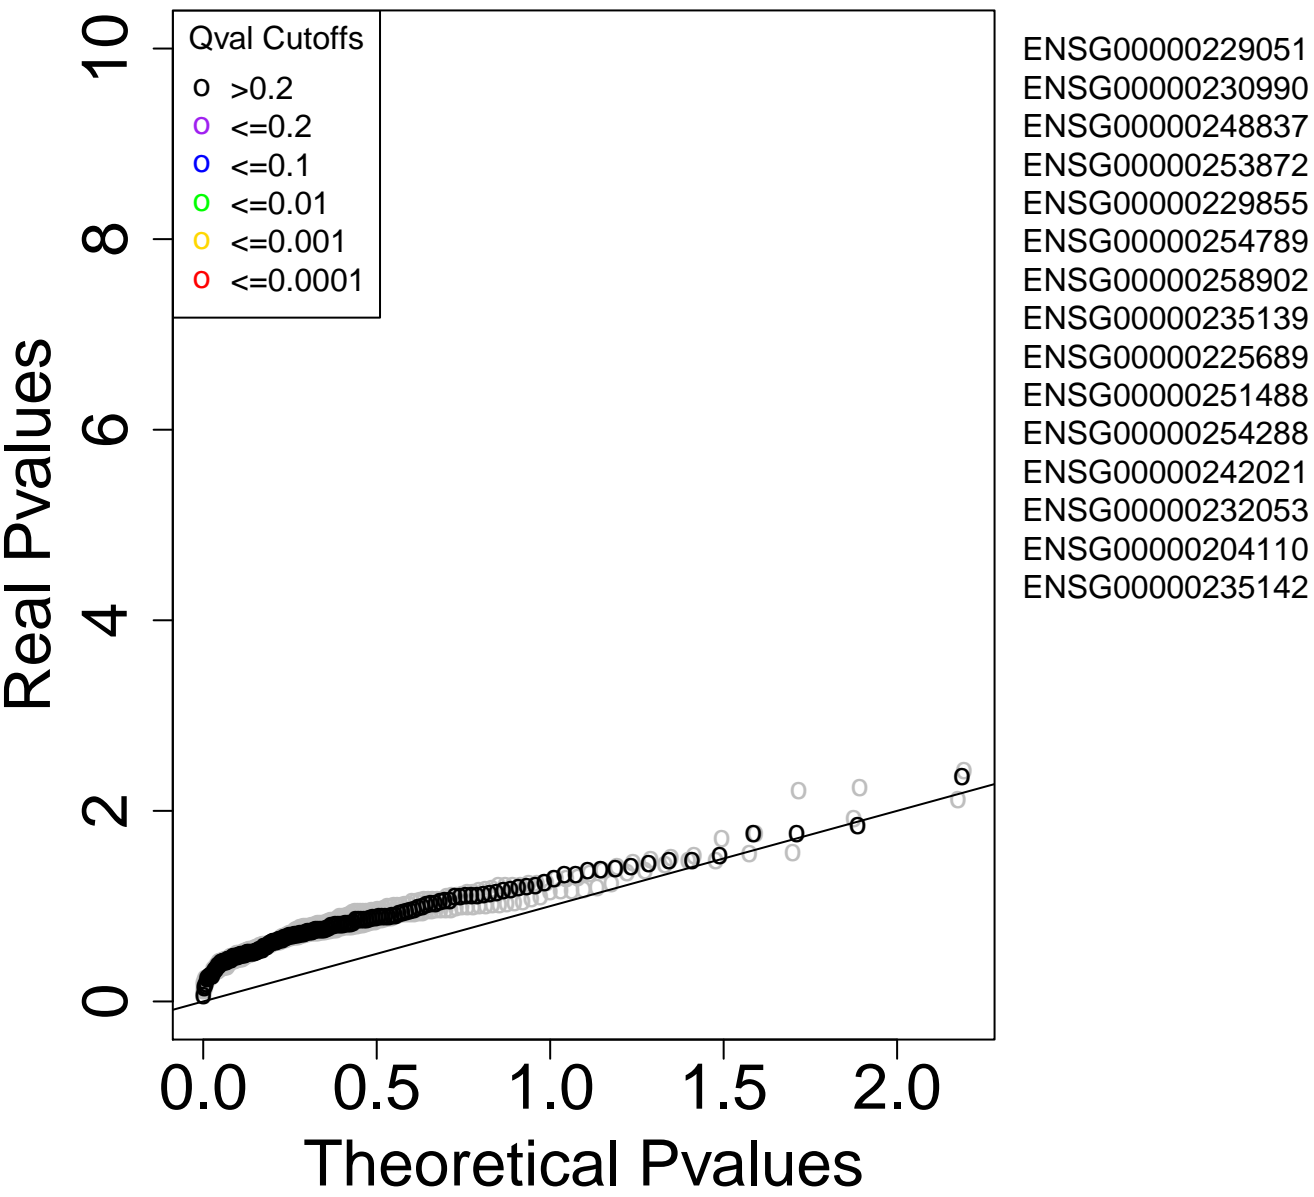

# RNA Pancancer\_Alexandrov – 4303 genes

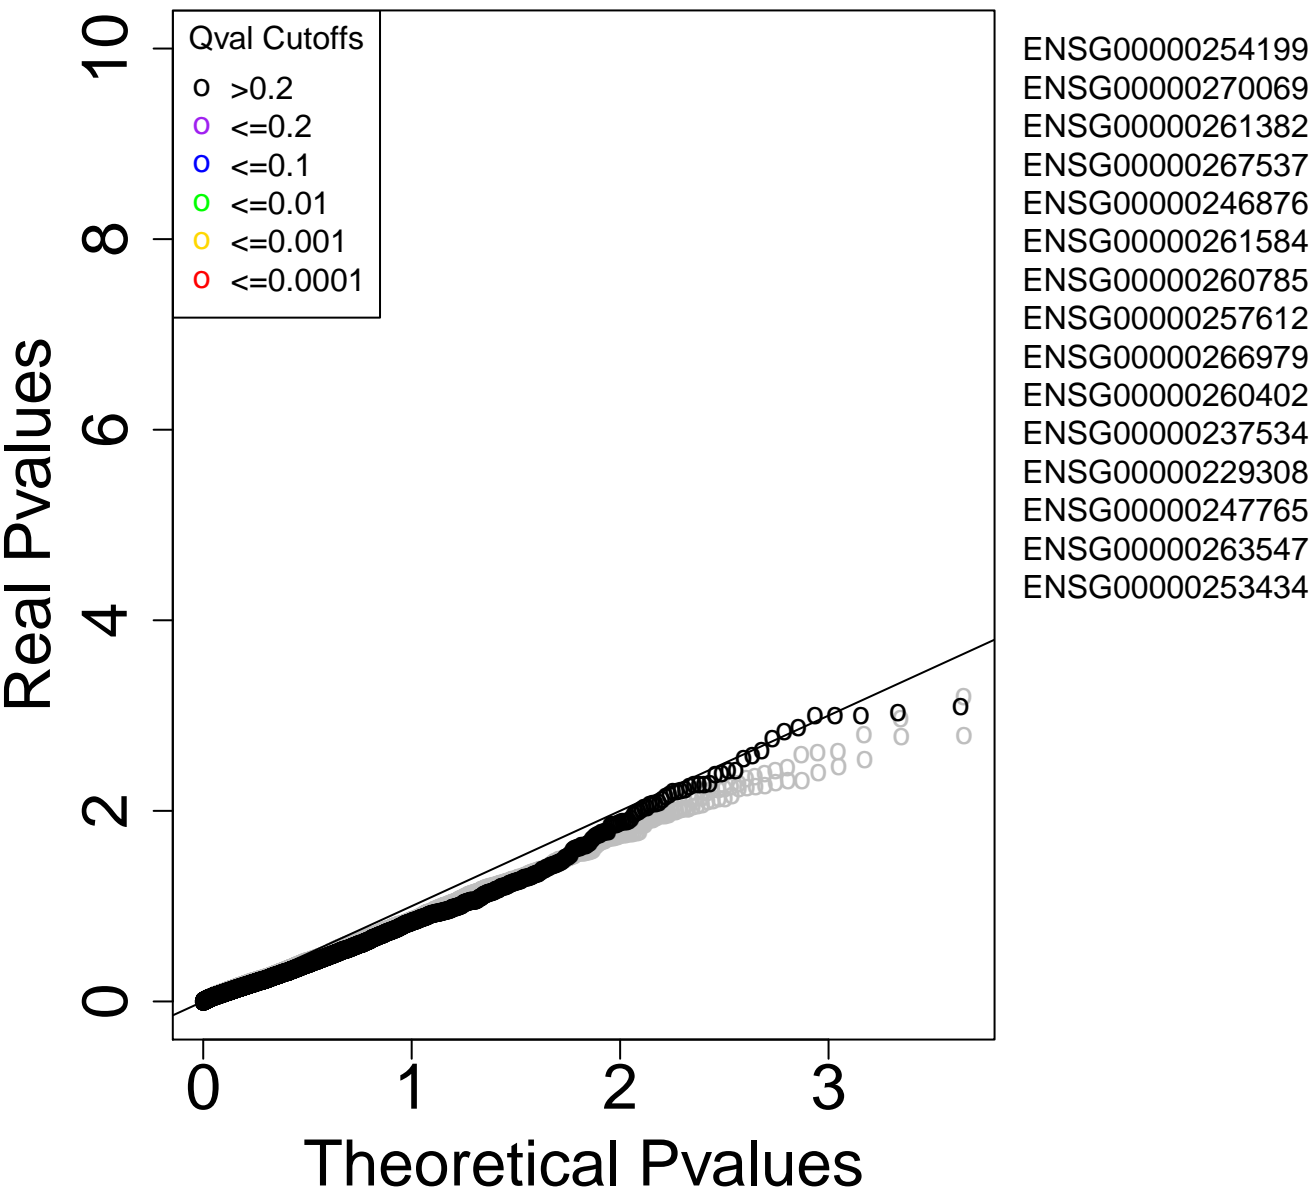



# lncRNA Pancancer\_TCGA – 5331 genes

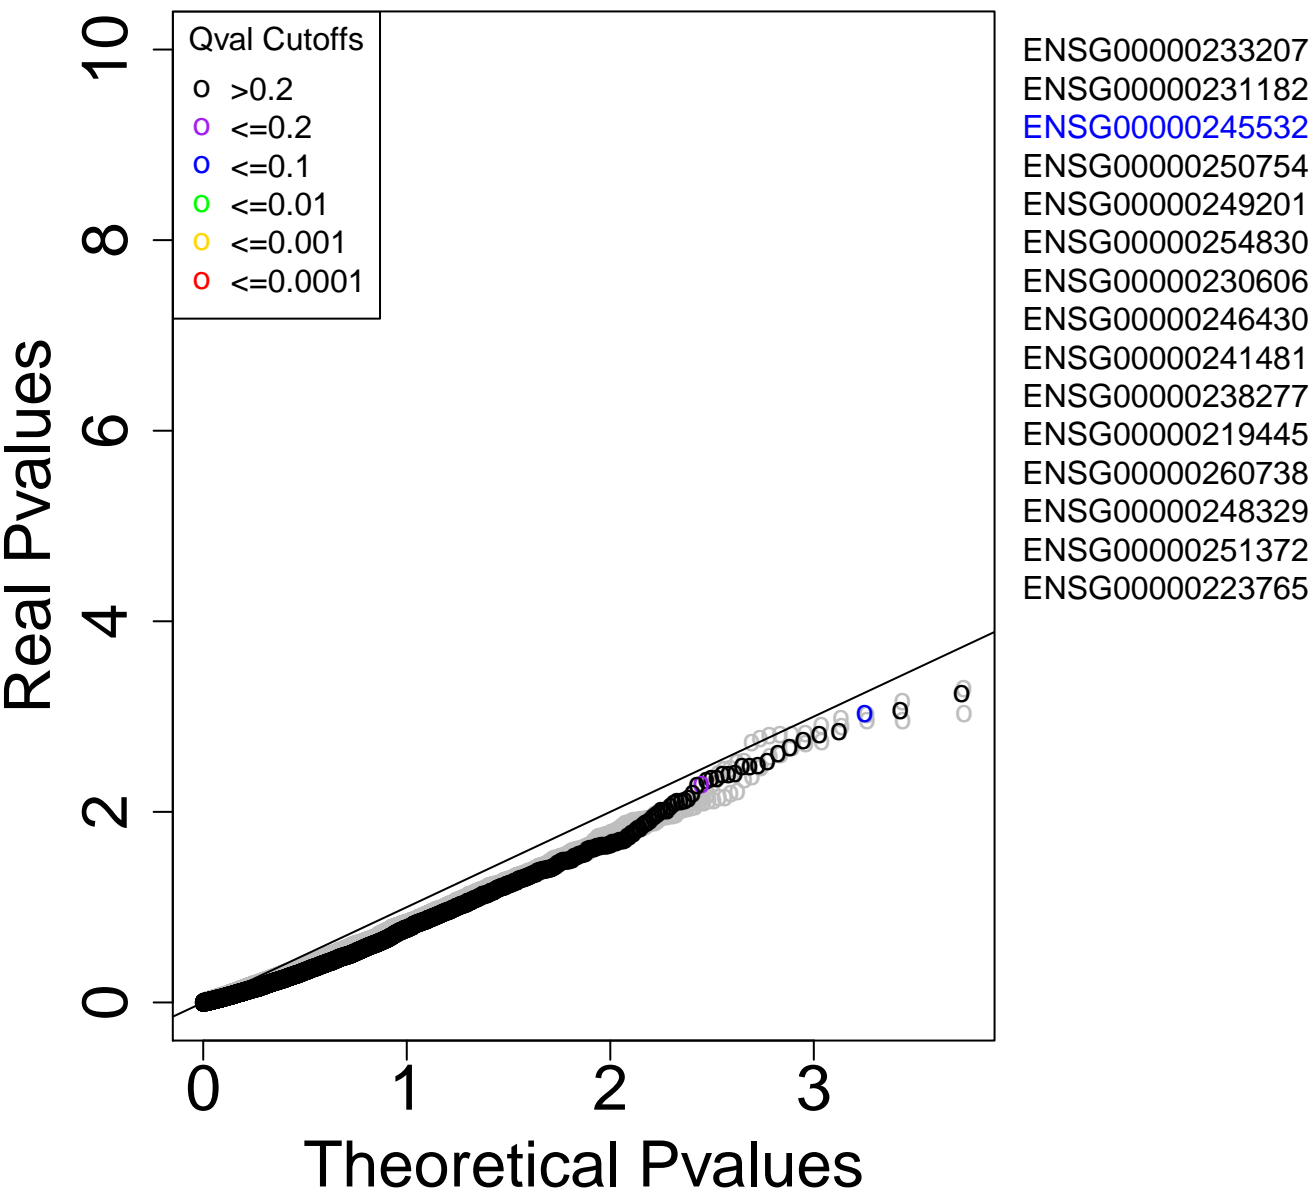

# LncRNA Pancreas – 123 genes

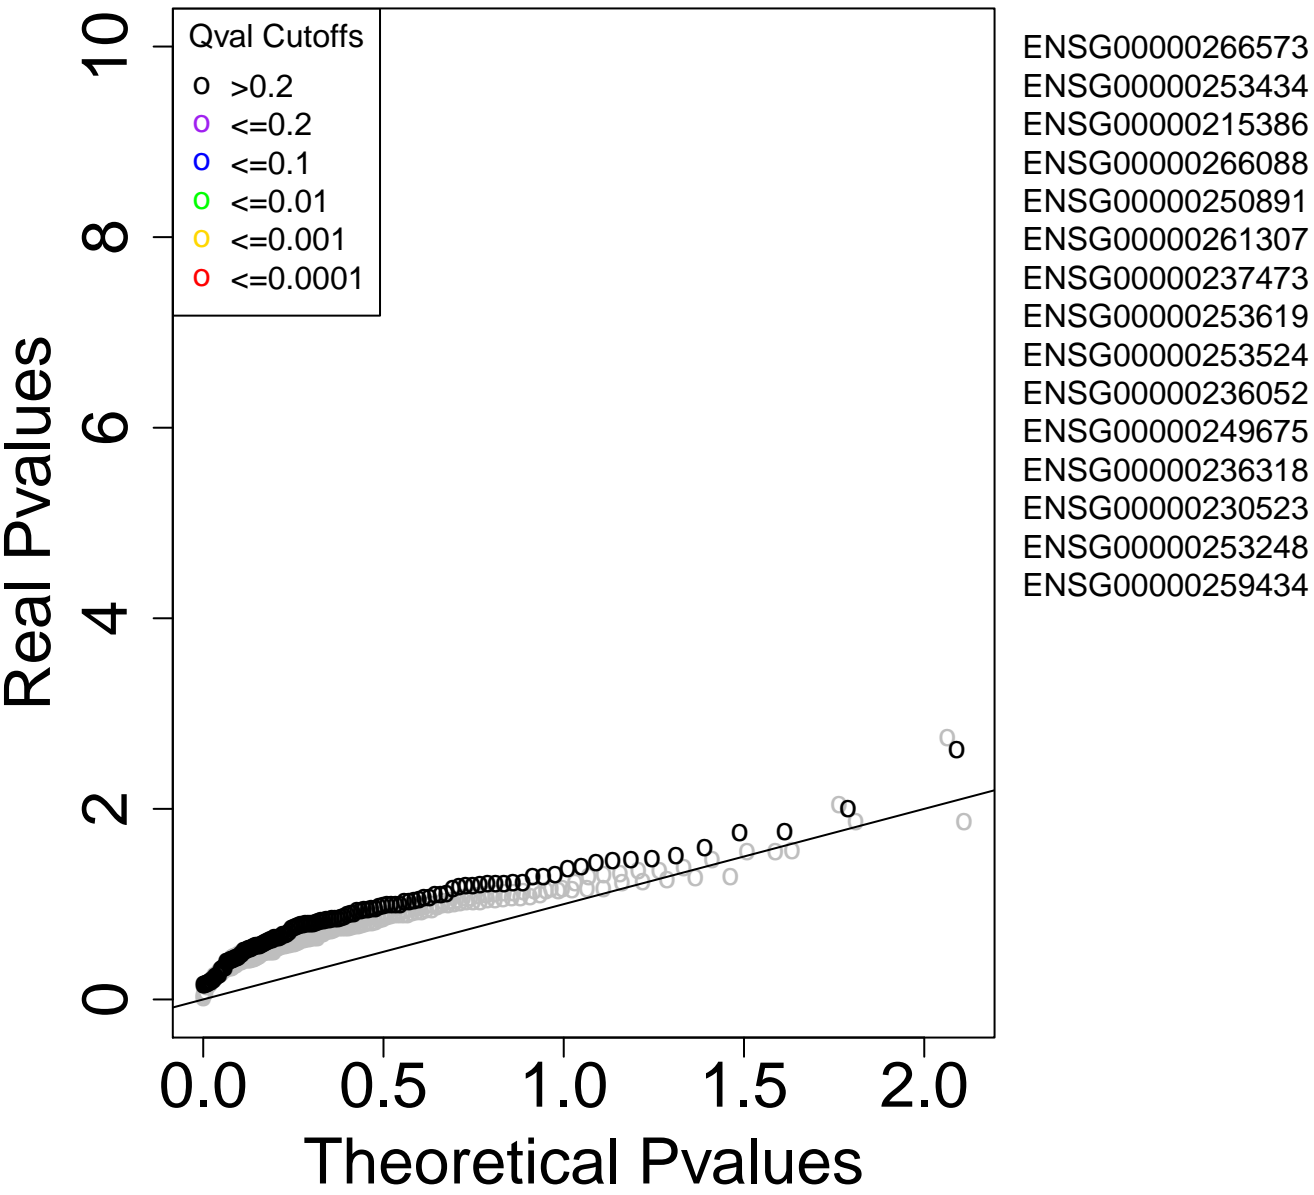

# ncRNA Pilocytic\_astrocytoma – 3 genes

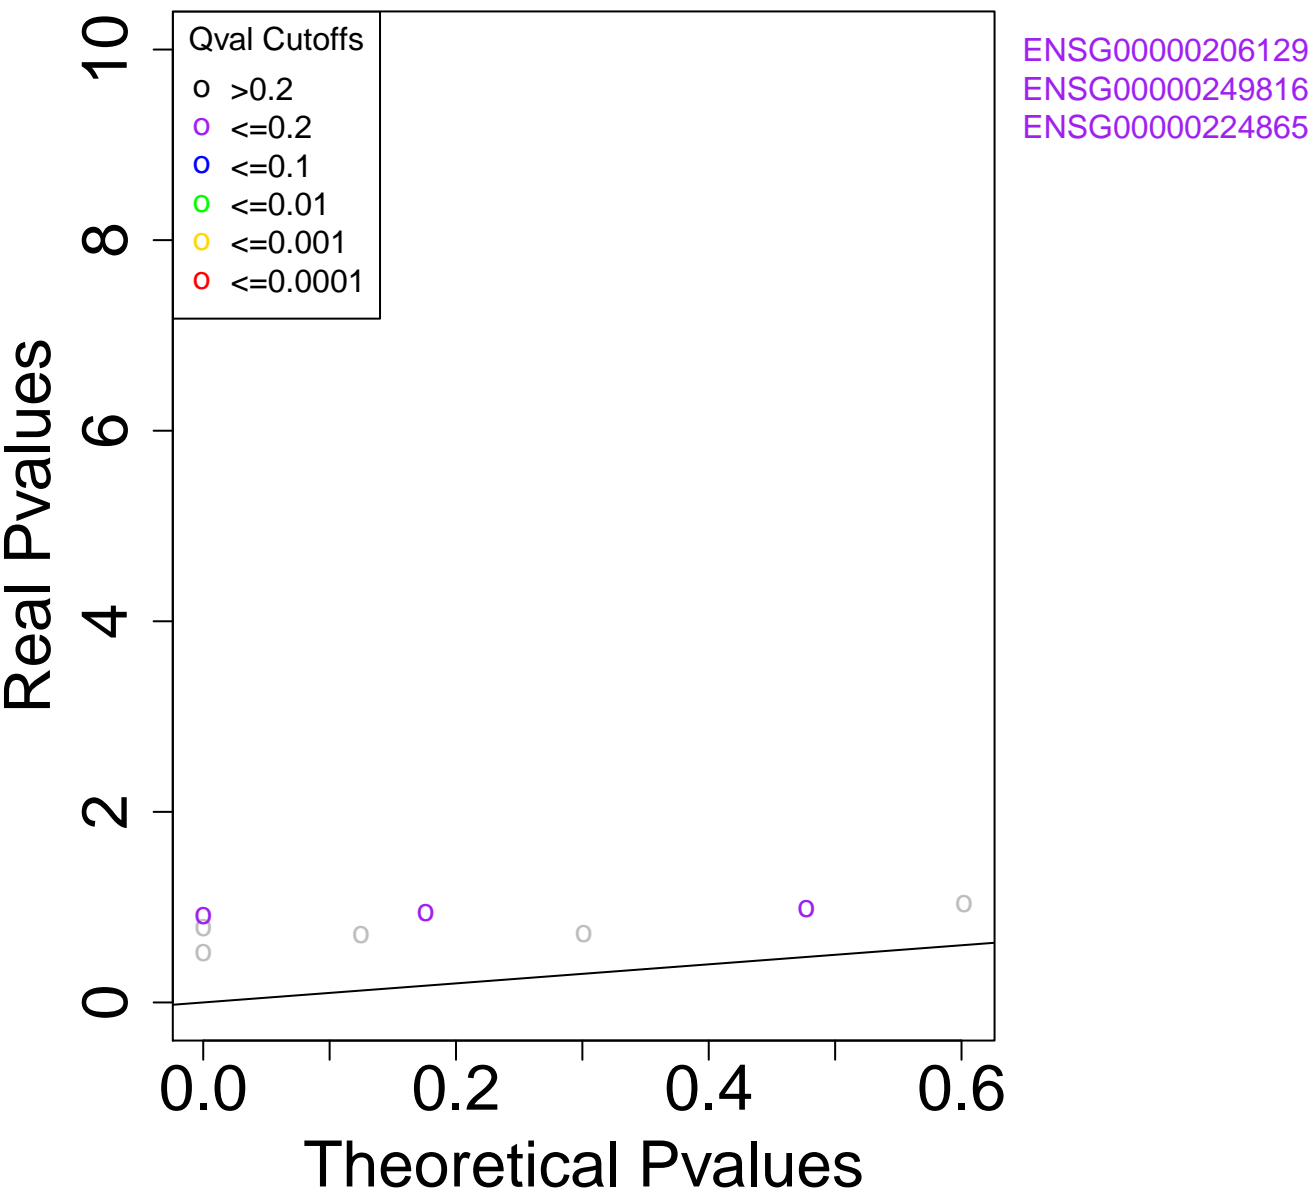

# LncRNA PRAD – 7 genes

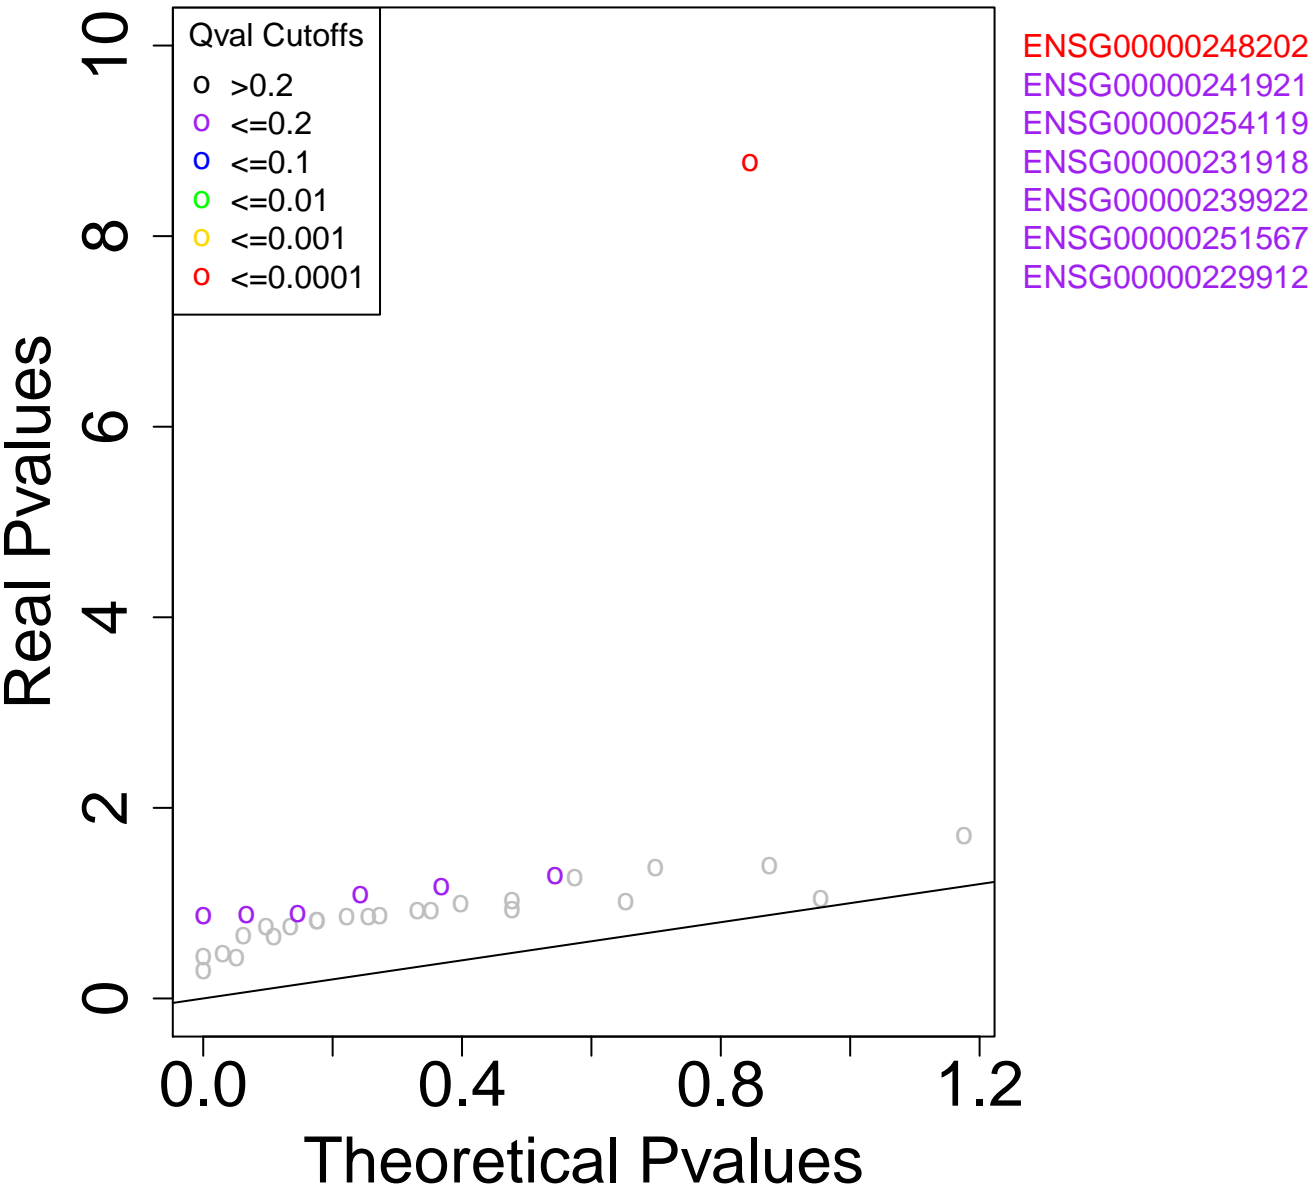

# LncRNA SKCM – 3300 genes

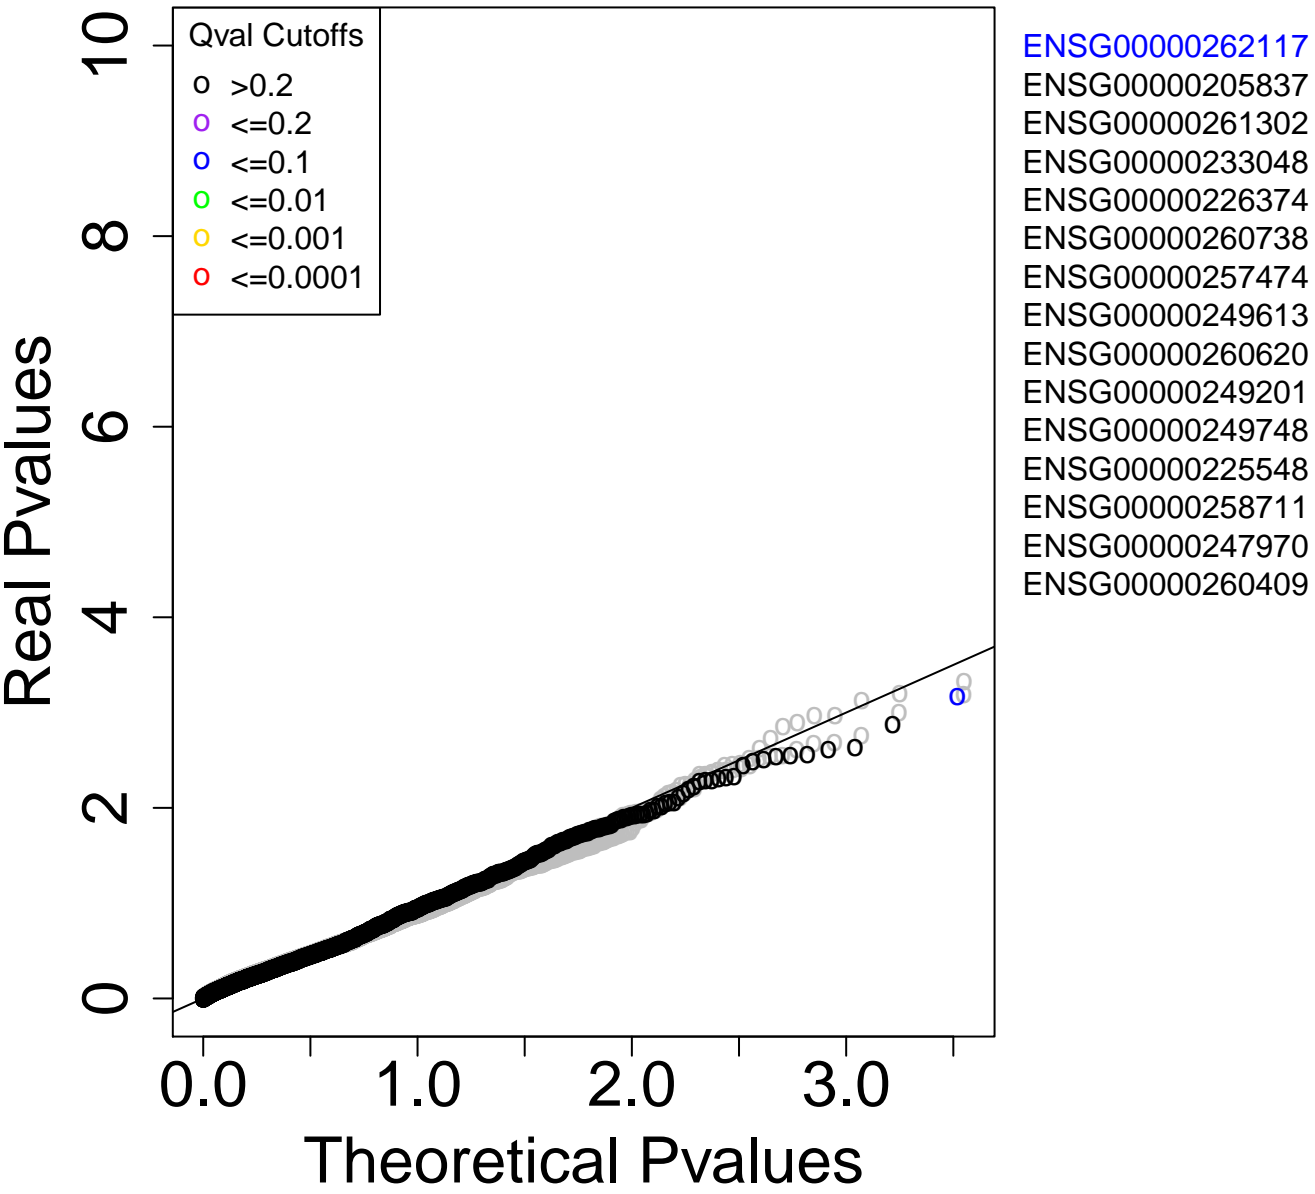

# LncRNA Stad – 2912 genes

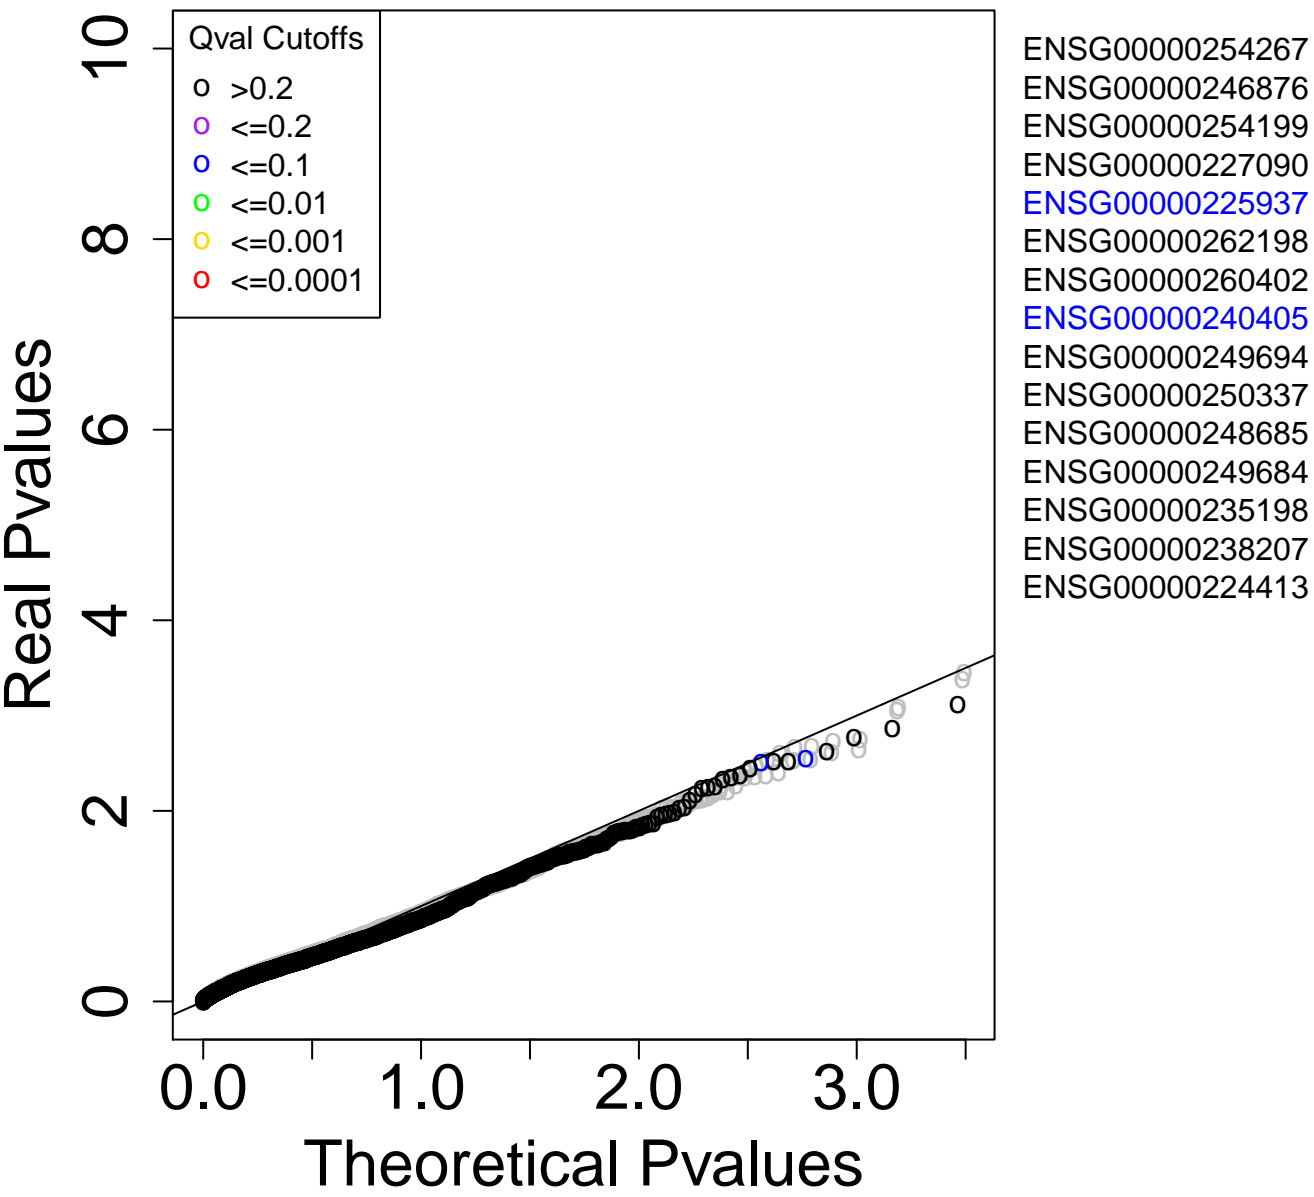

# LncRNA Superpancancer – 5583 genes

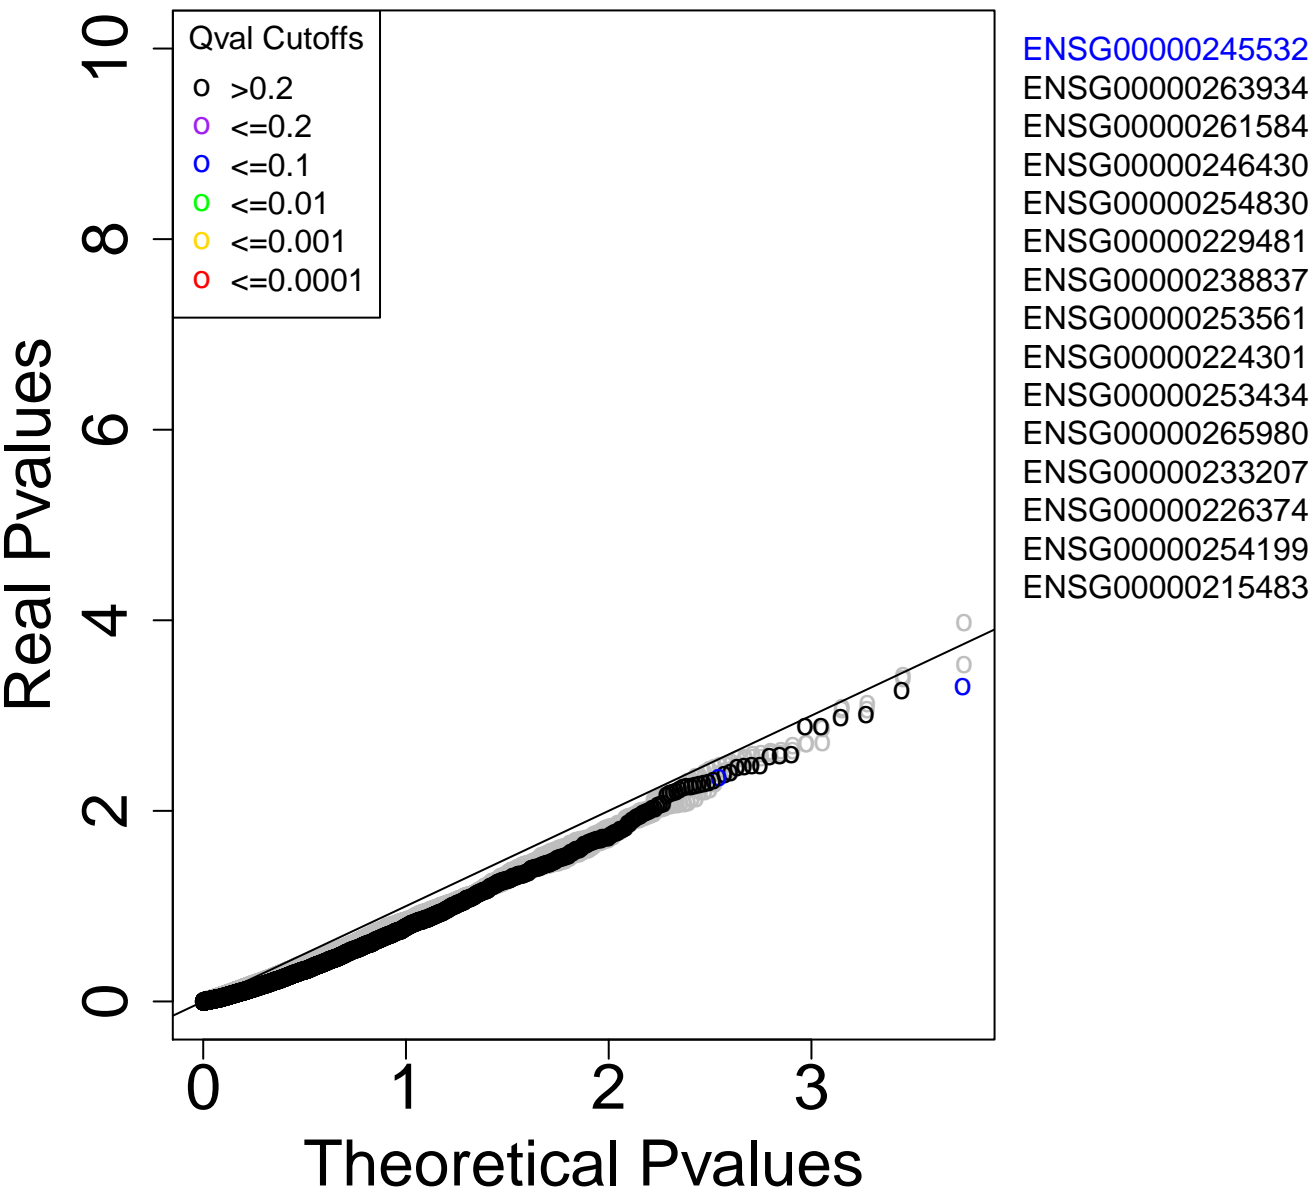

# LncRNA THCA – 18 genes

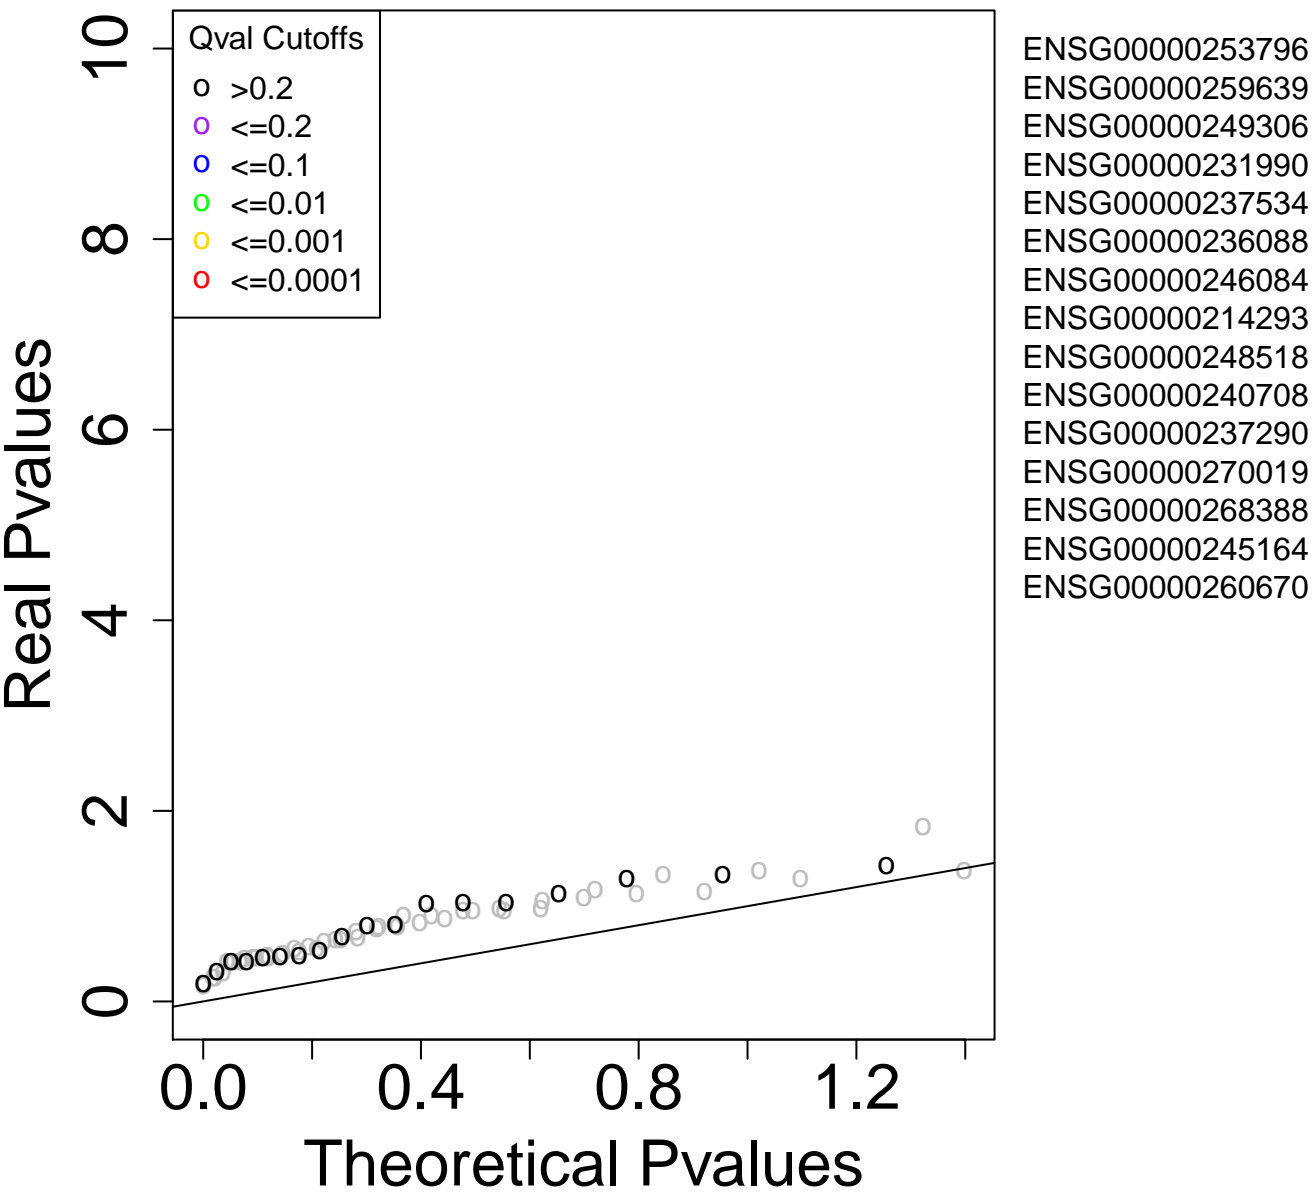



# LncRNA UCEC – 2521 genes

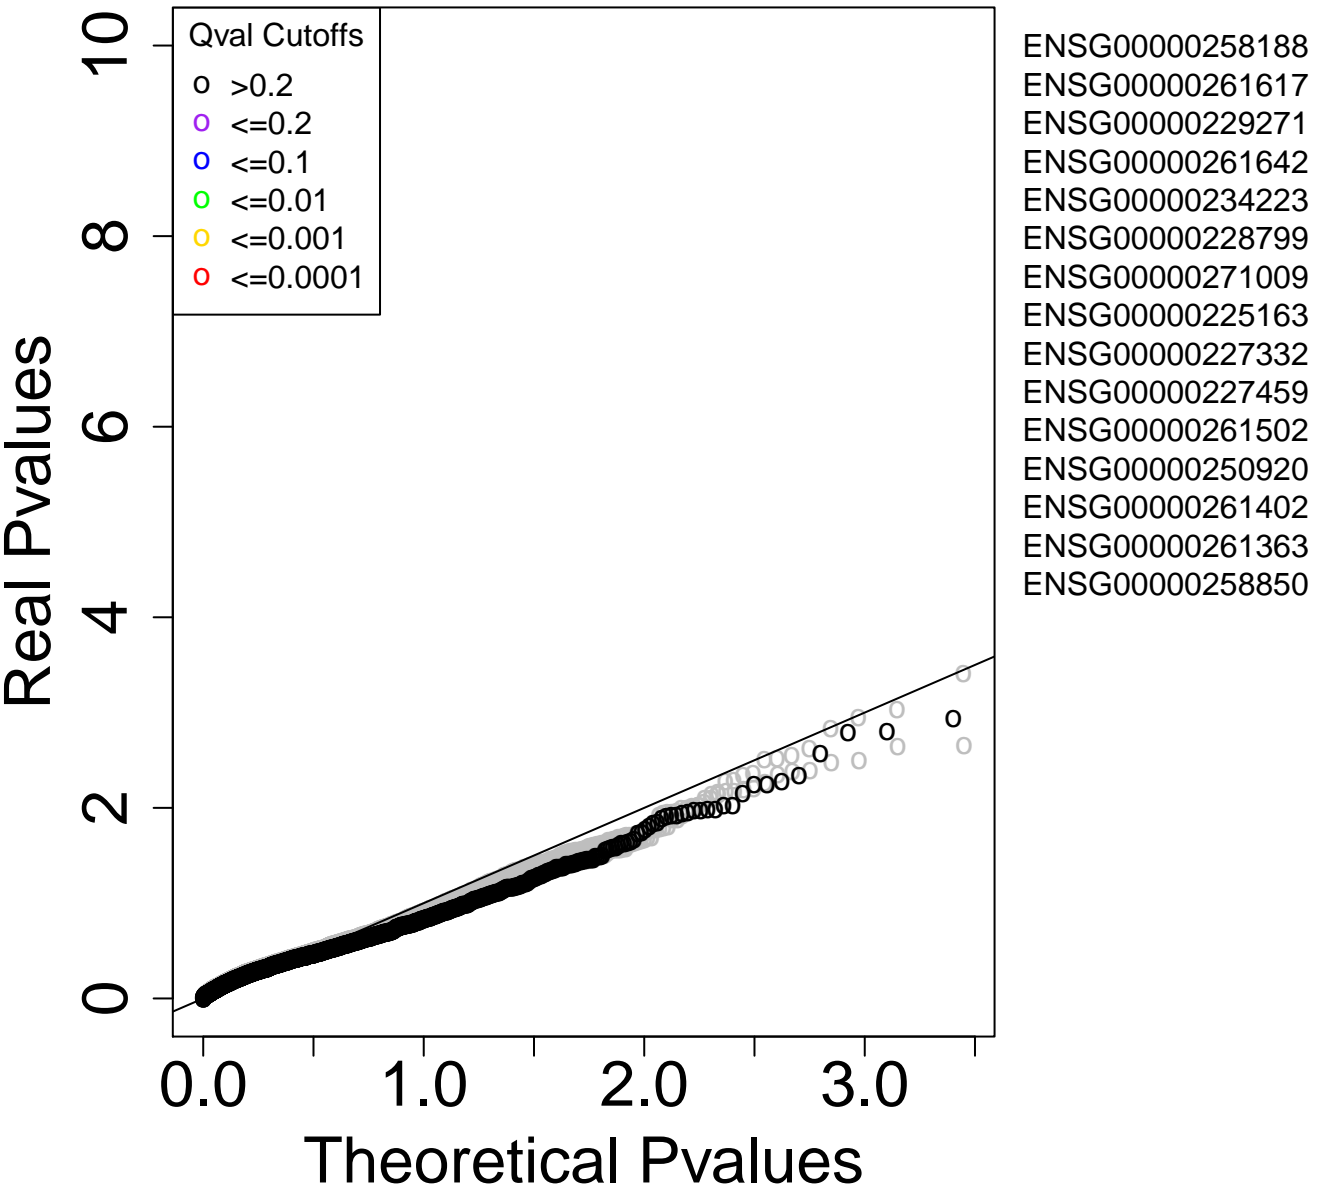

# Supplementary Figure S4

**LncRNAs detected in Breast after 100 simulations**

**Candidates detected in real data: 3**

**Pvalue (simulation $\geq$ real) = 0.03**

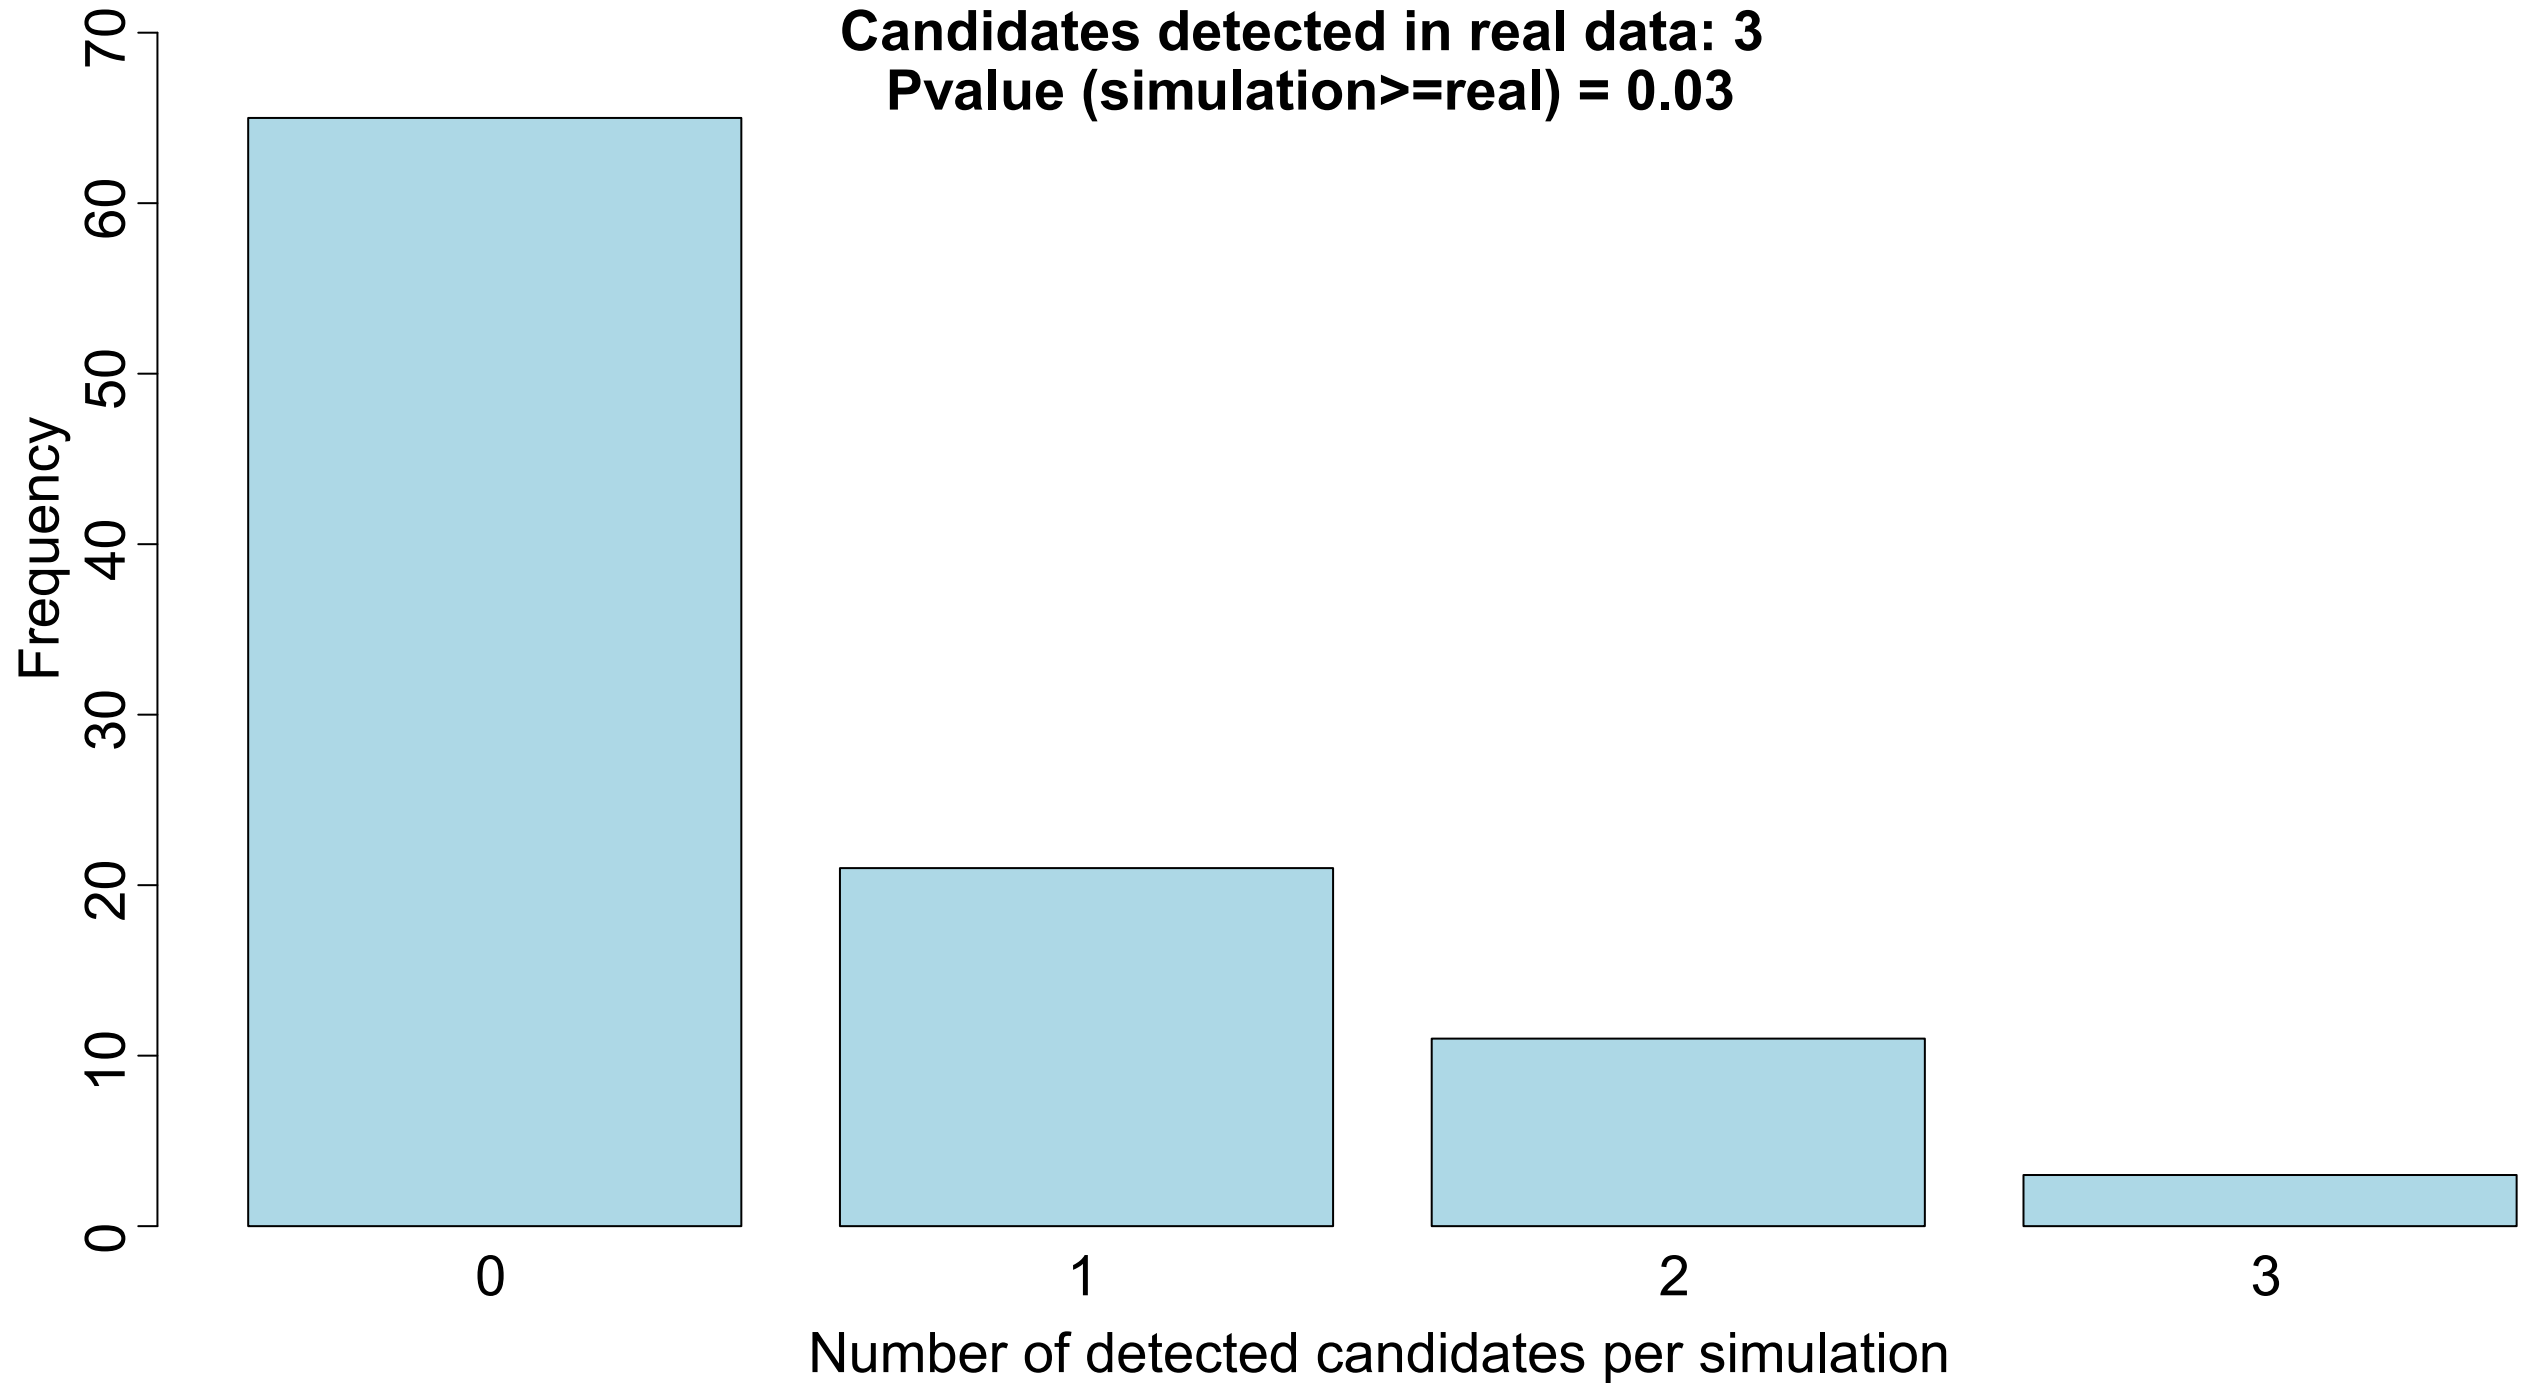

# Breast QQplot – 694 genes

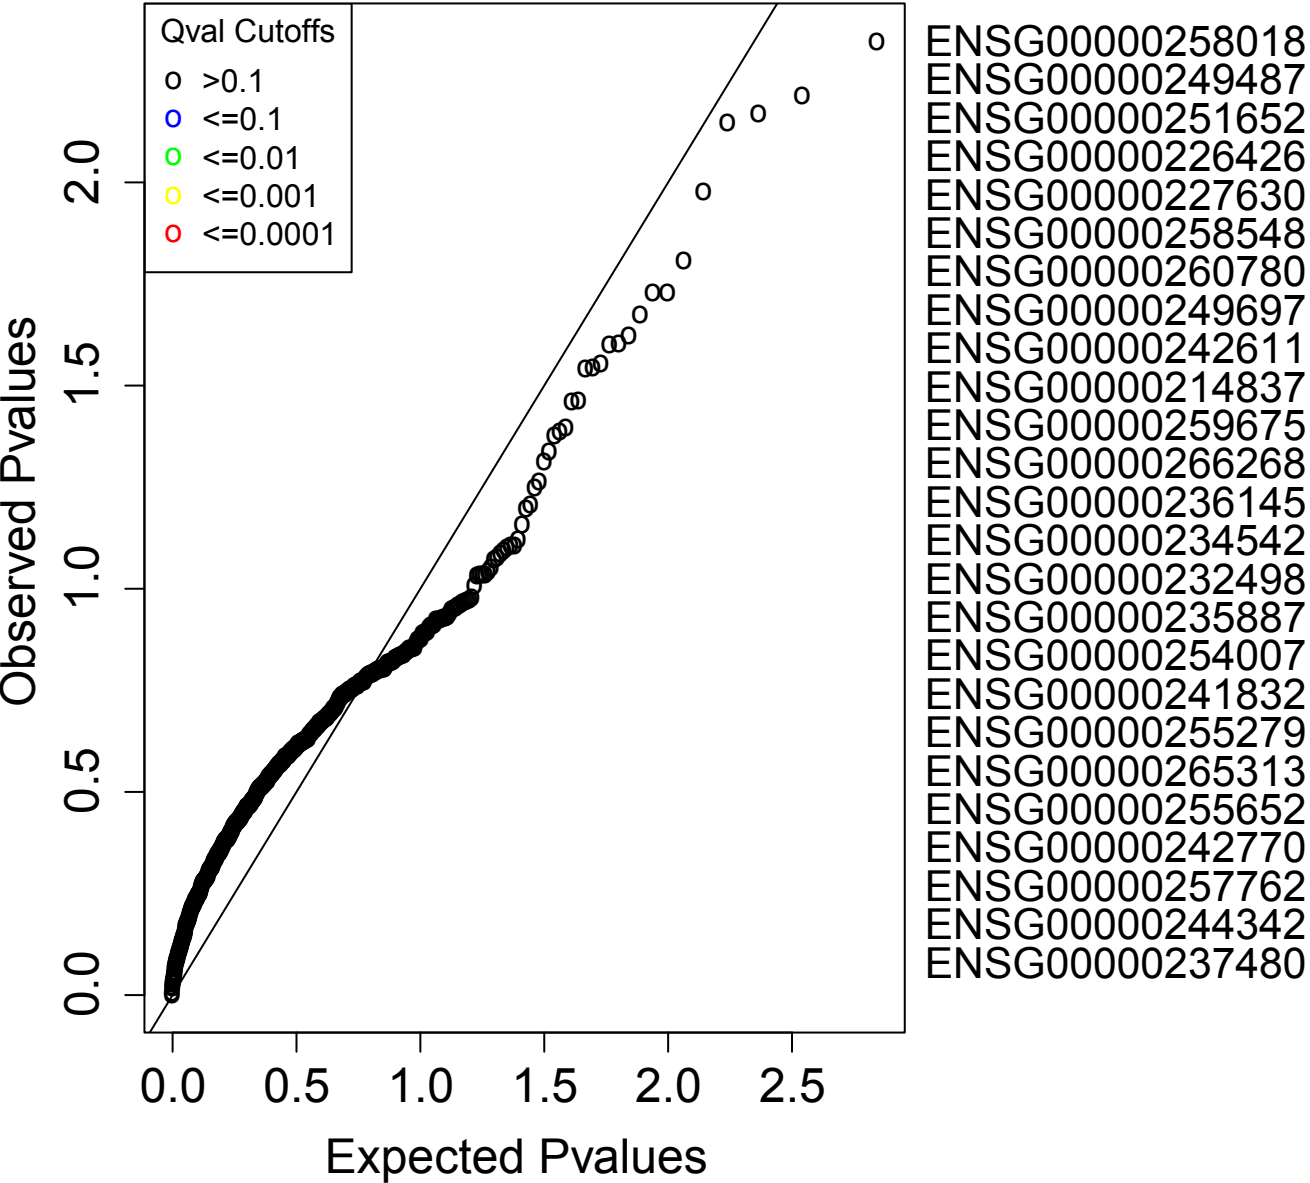



# Supplementary Figure S7

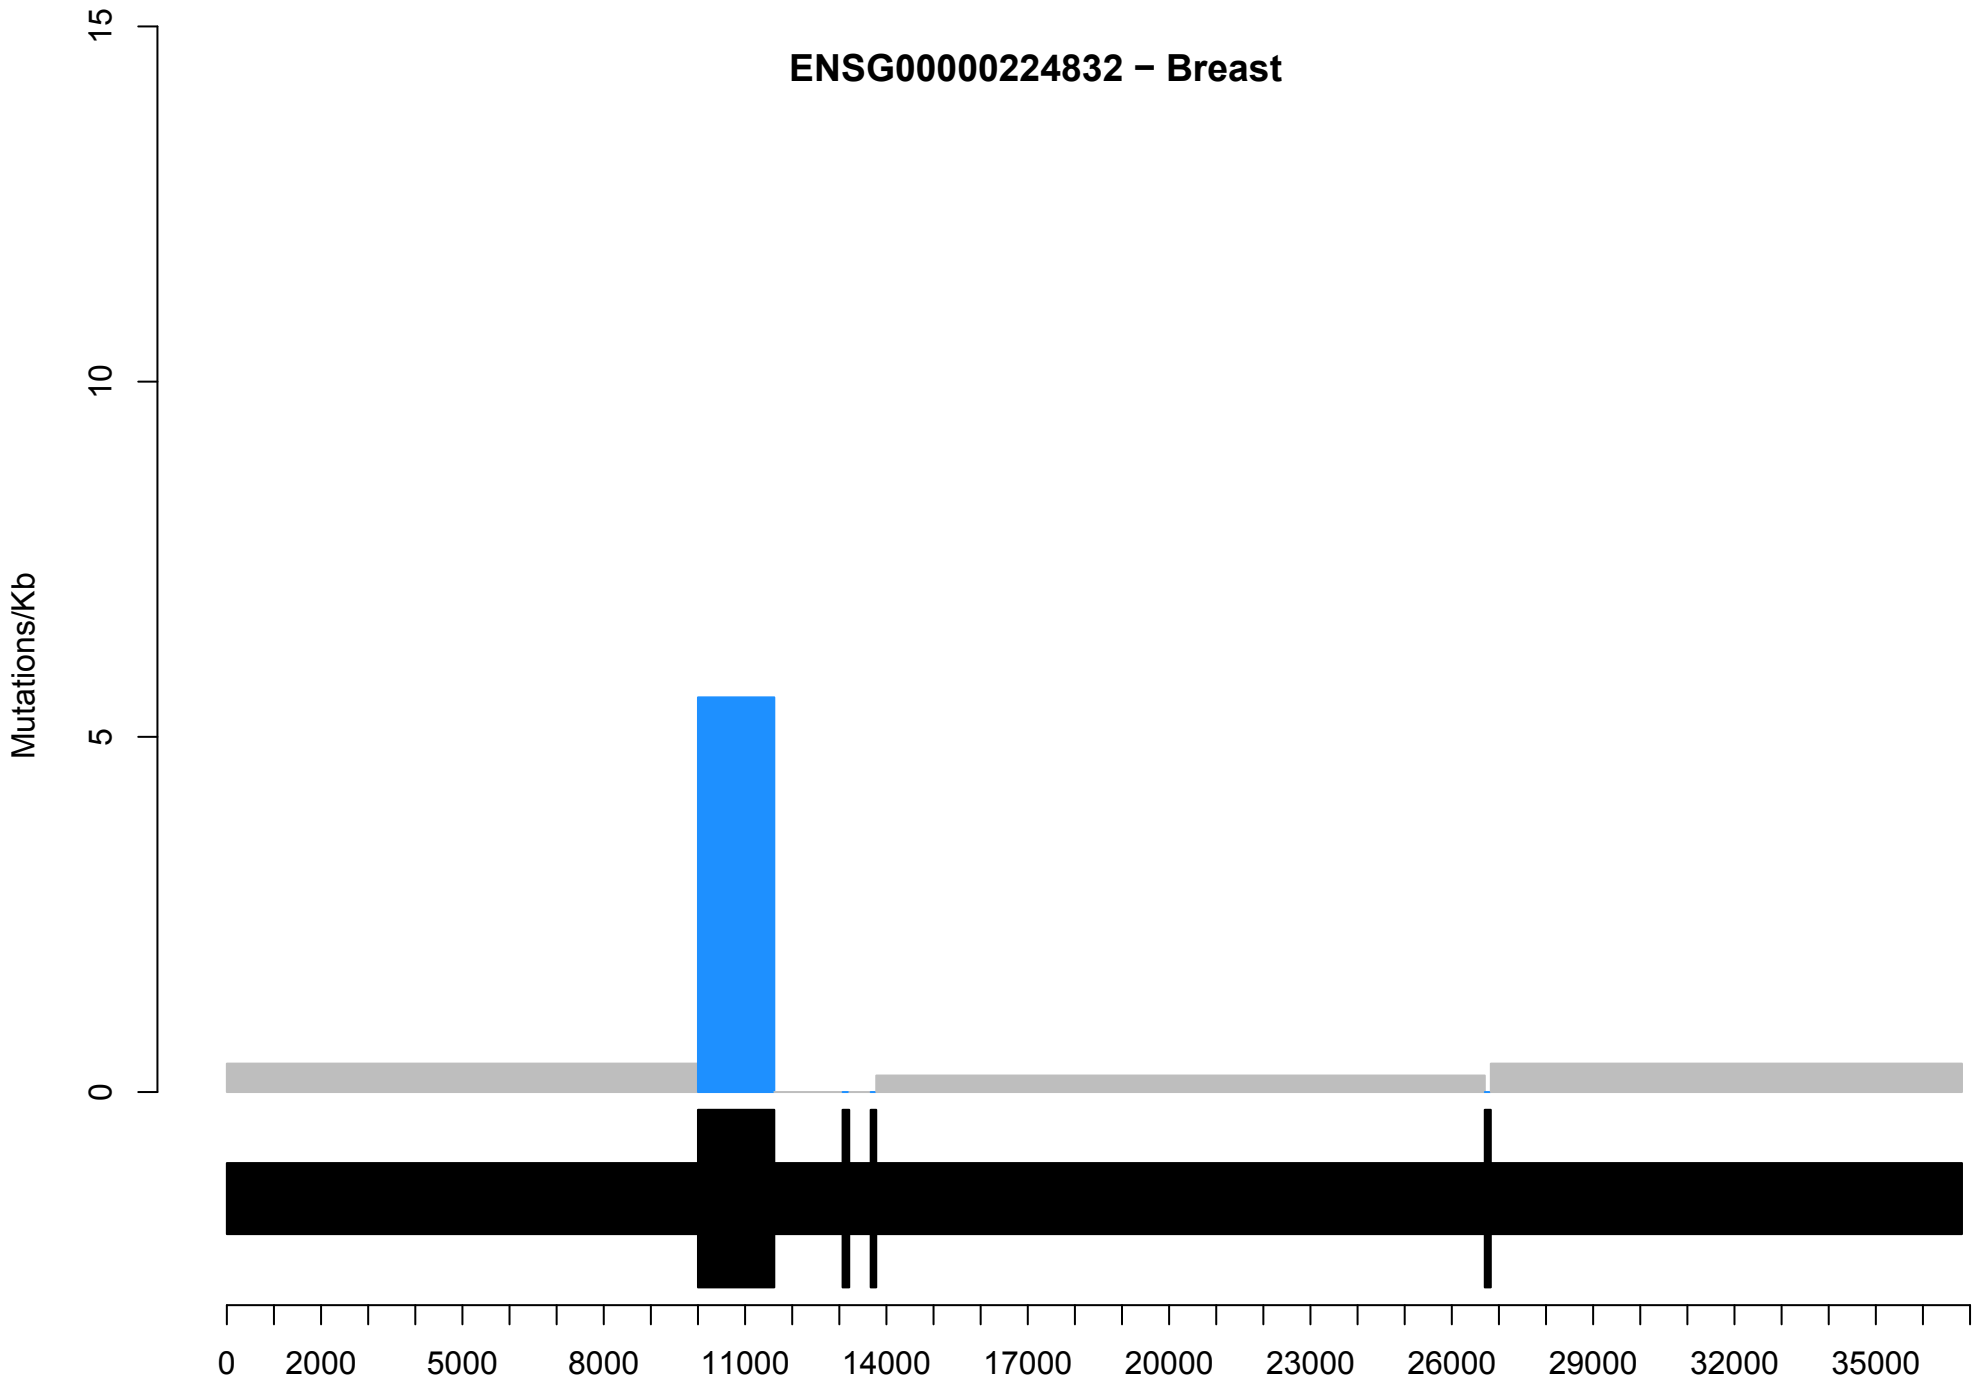

# ENSG00000225937 – Stad

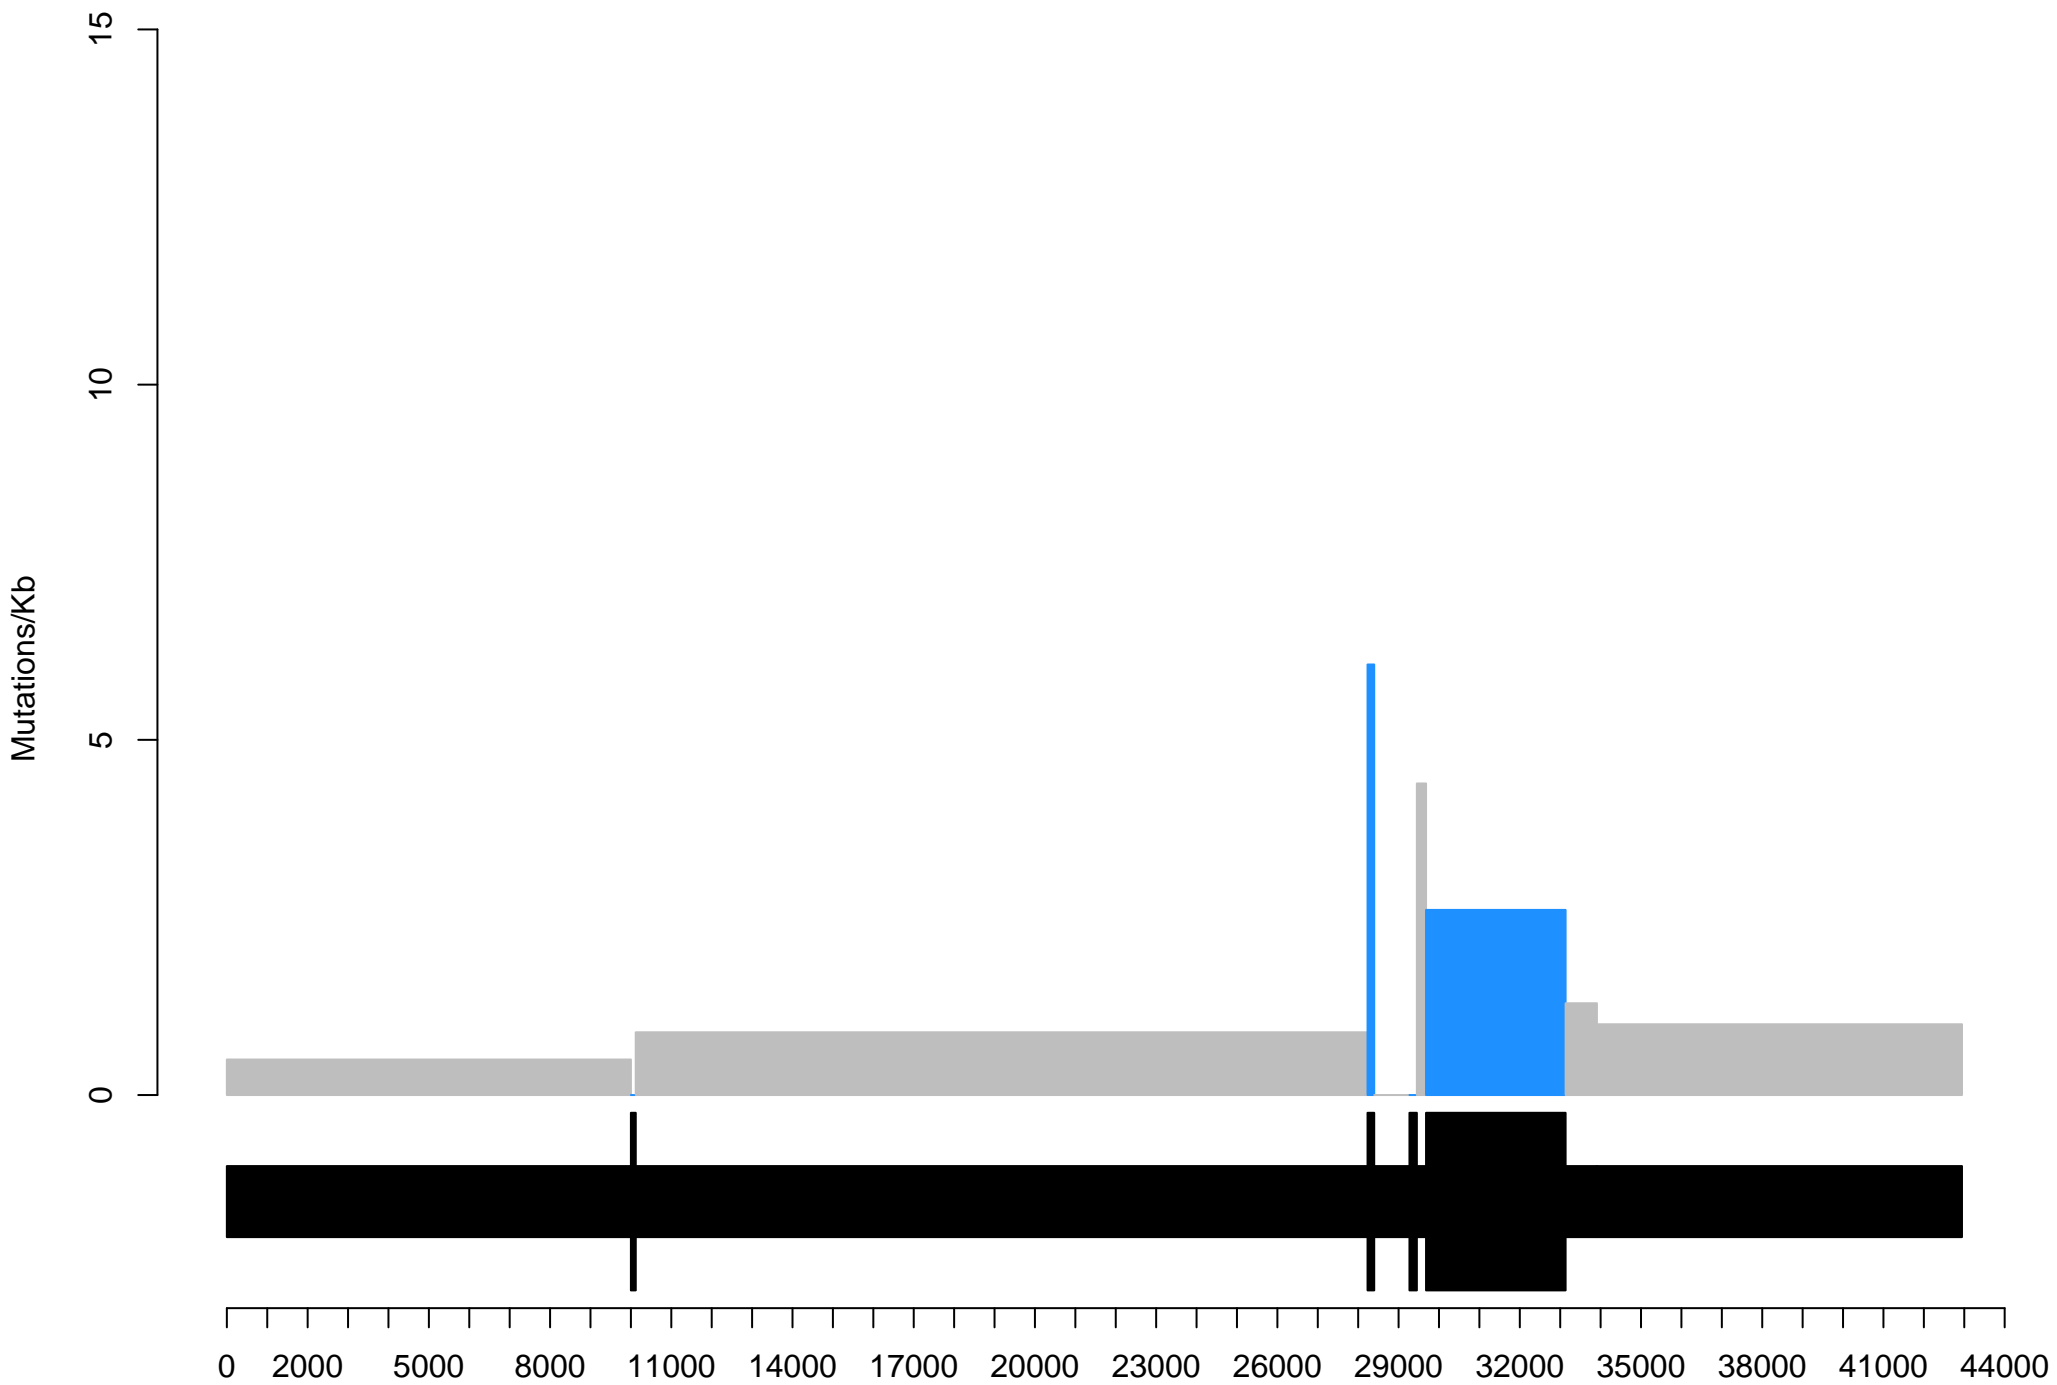

# ENSG00000234323 – KICH

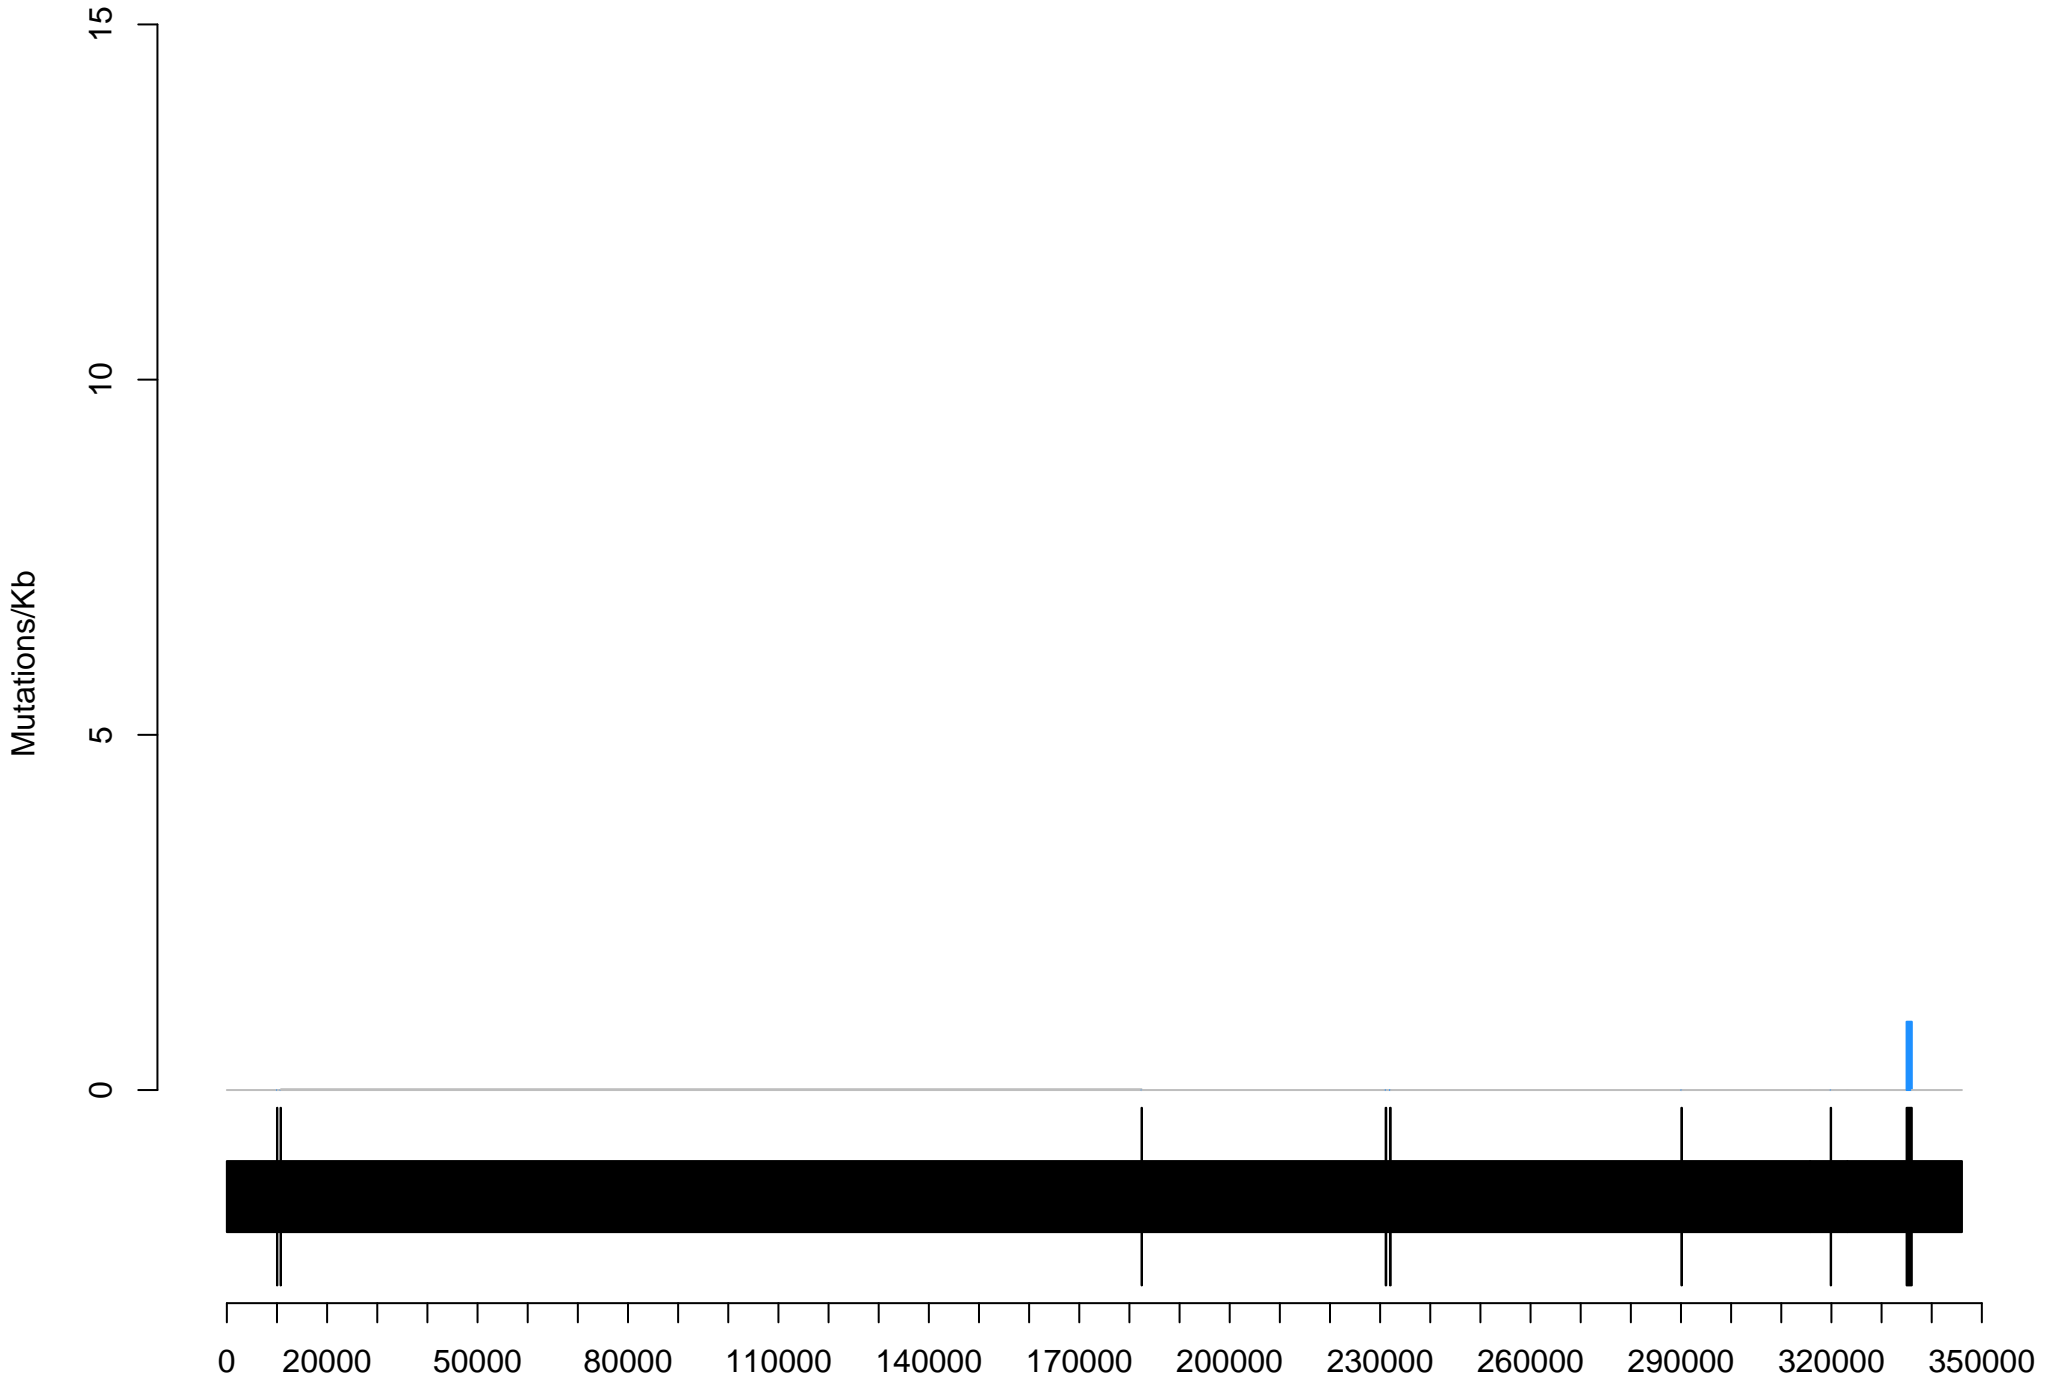

# ENSG00000240405 – Stad

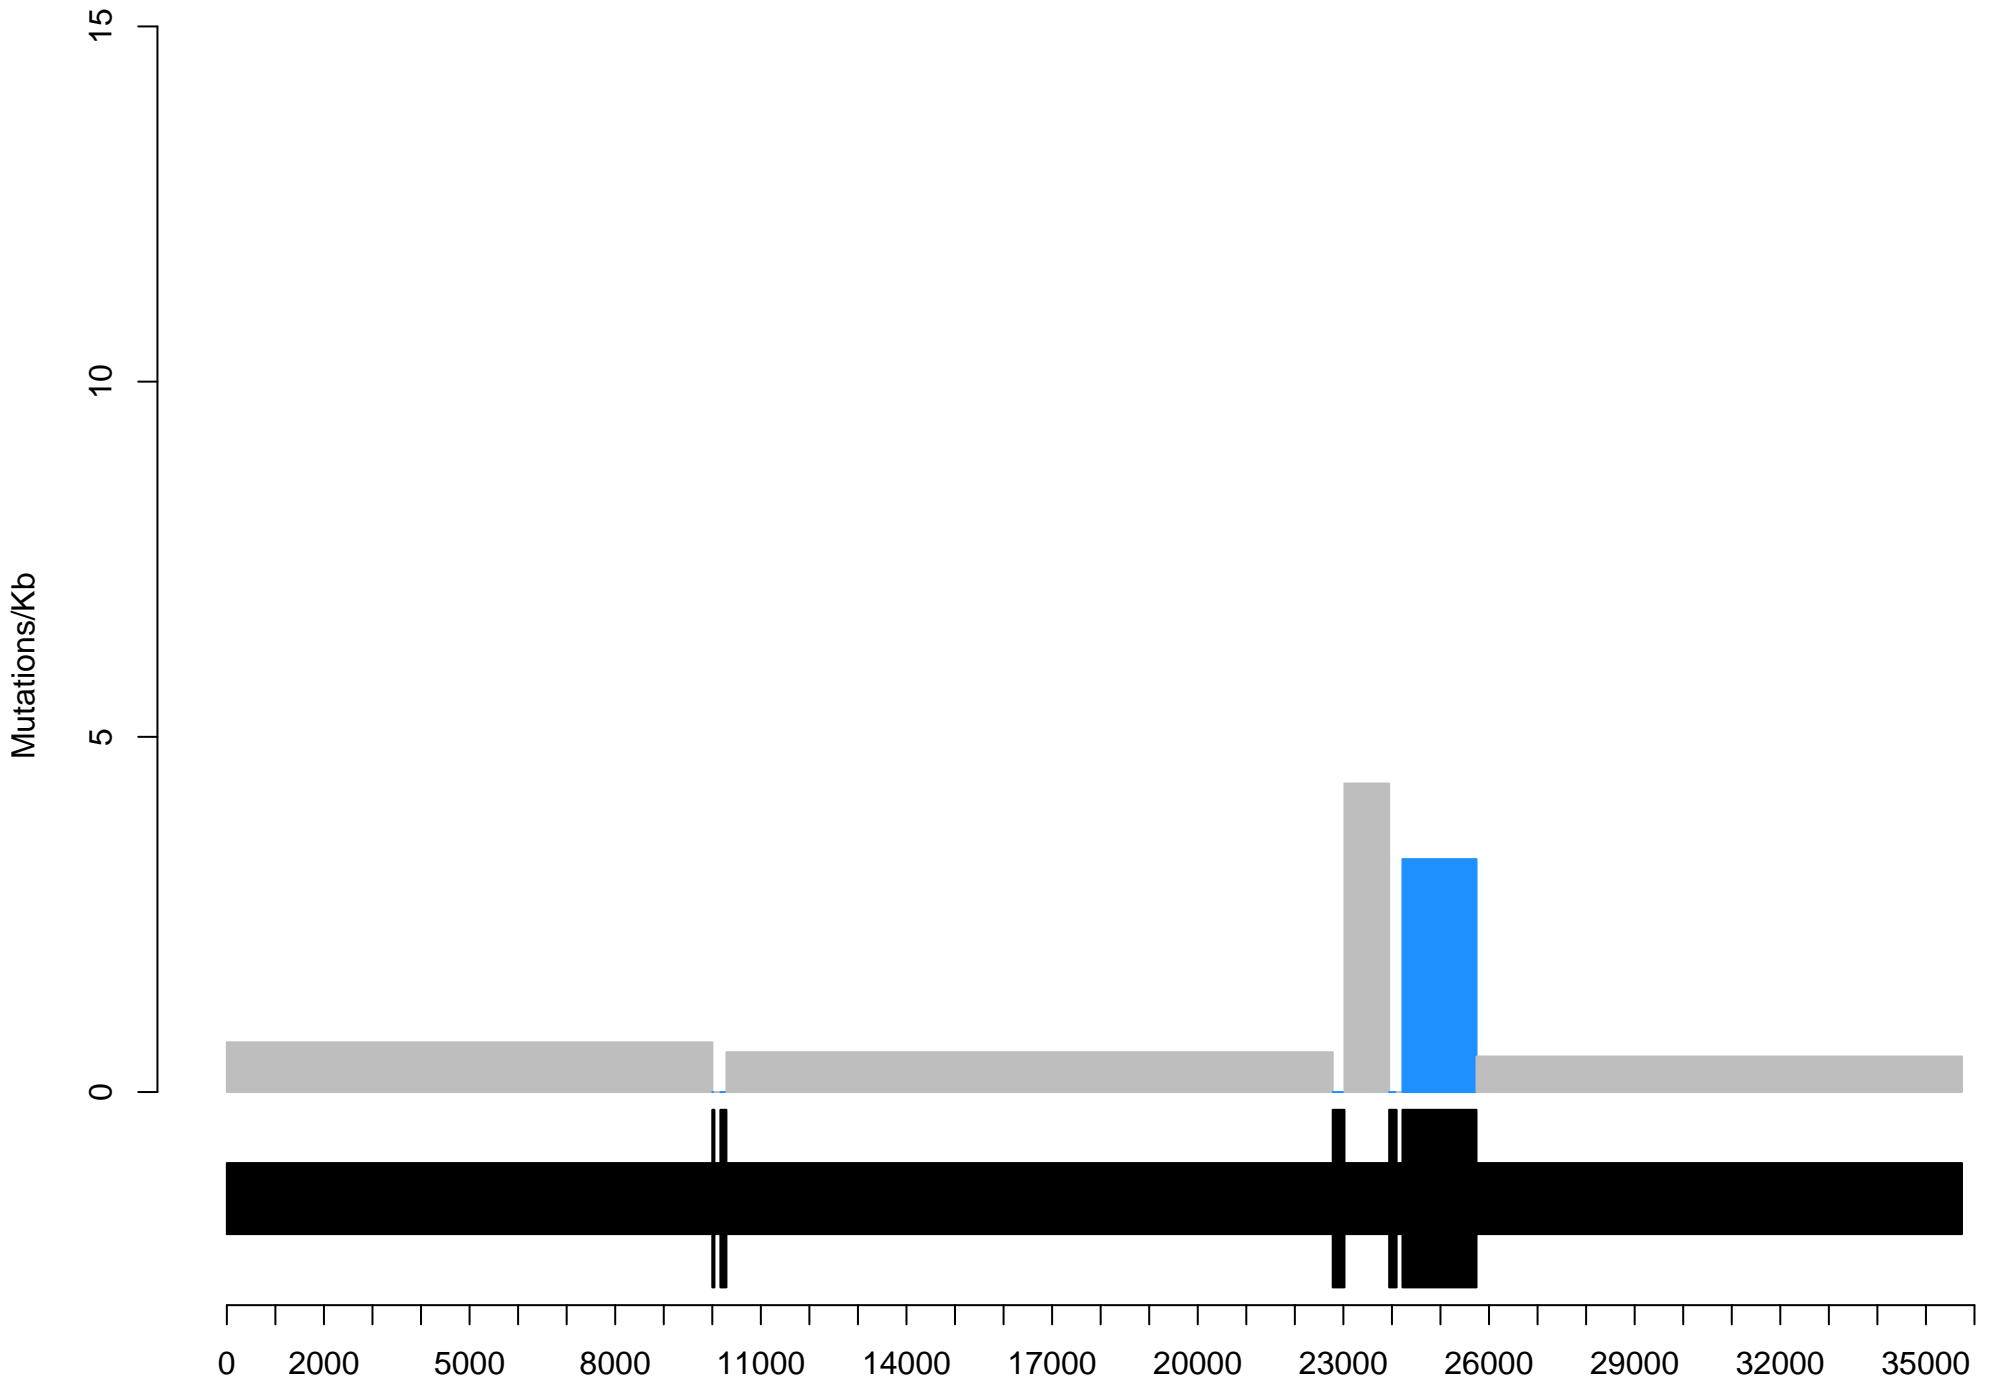



# ENSG00000244306 - GBM

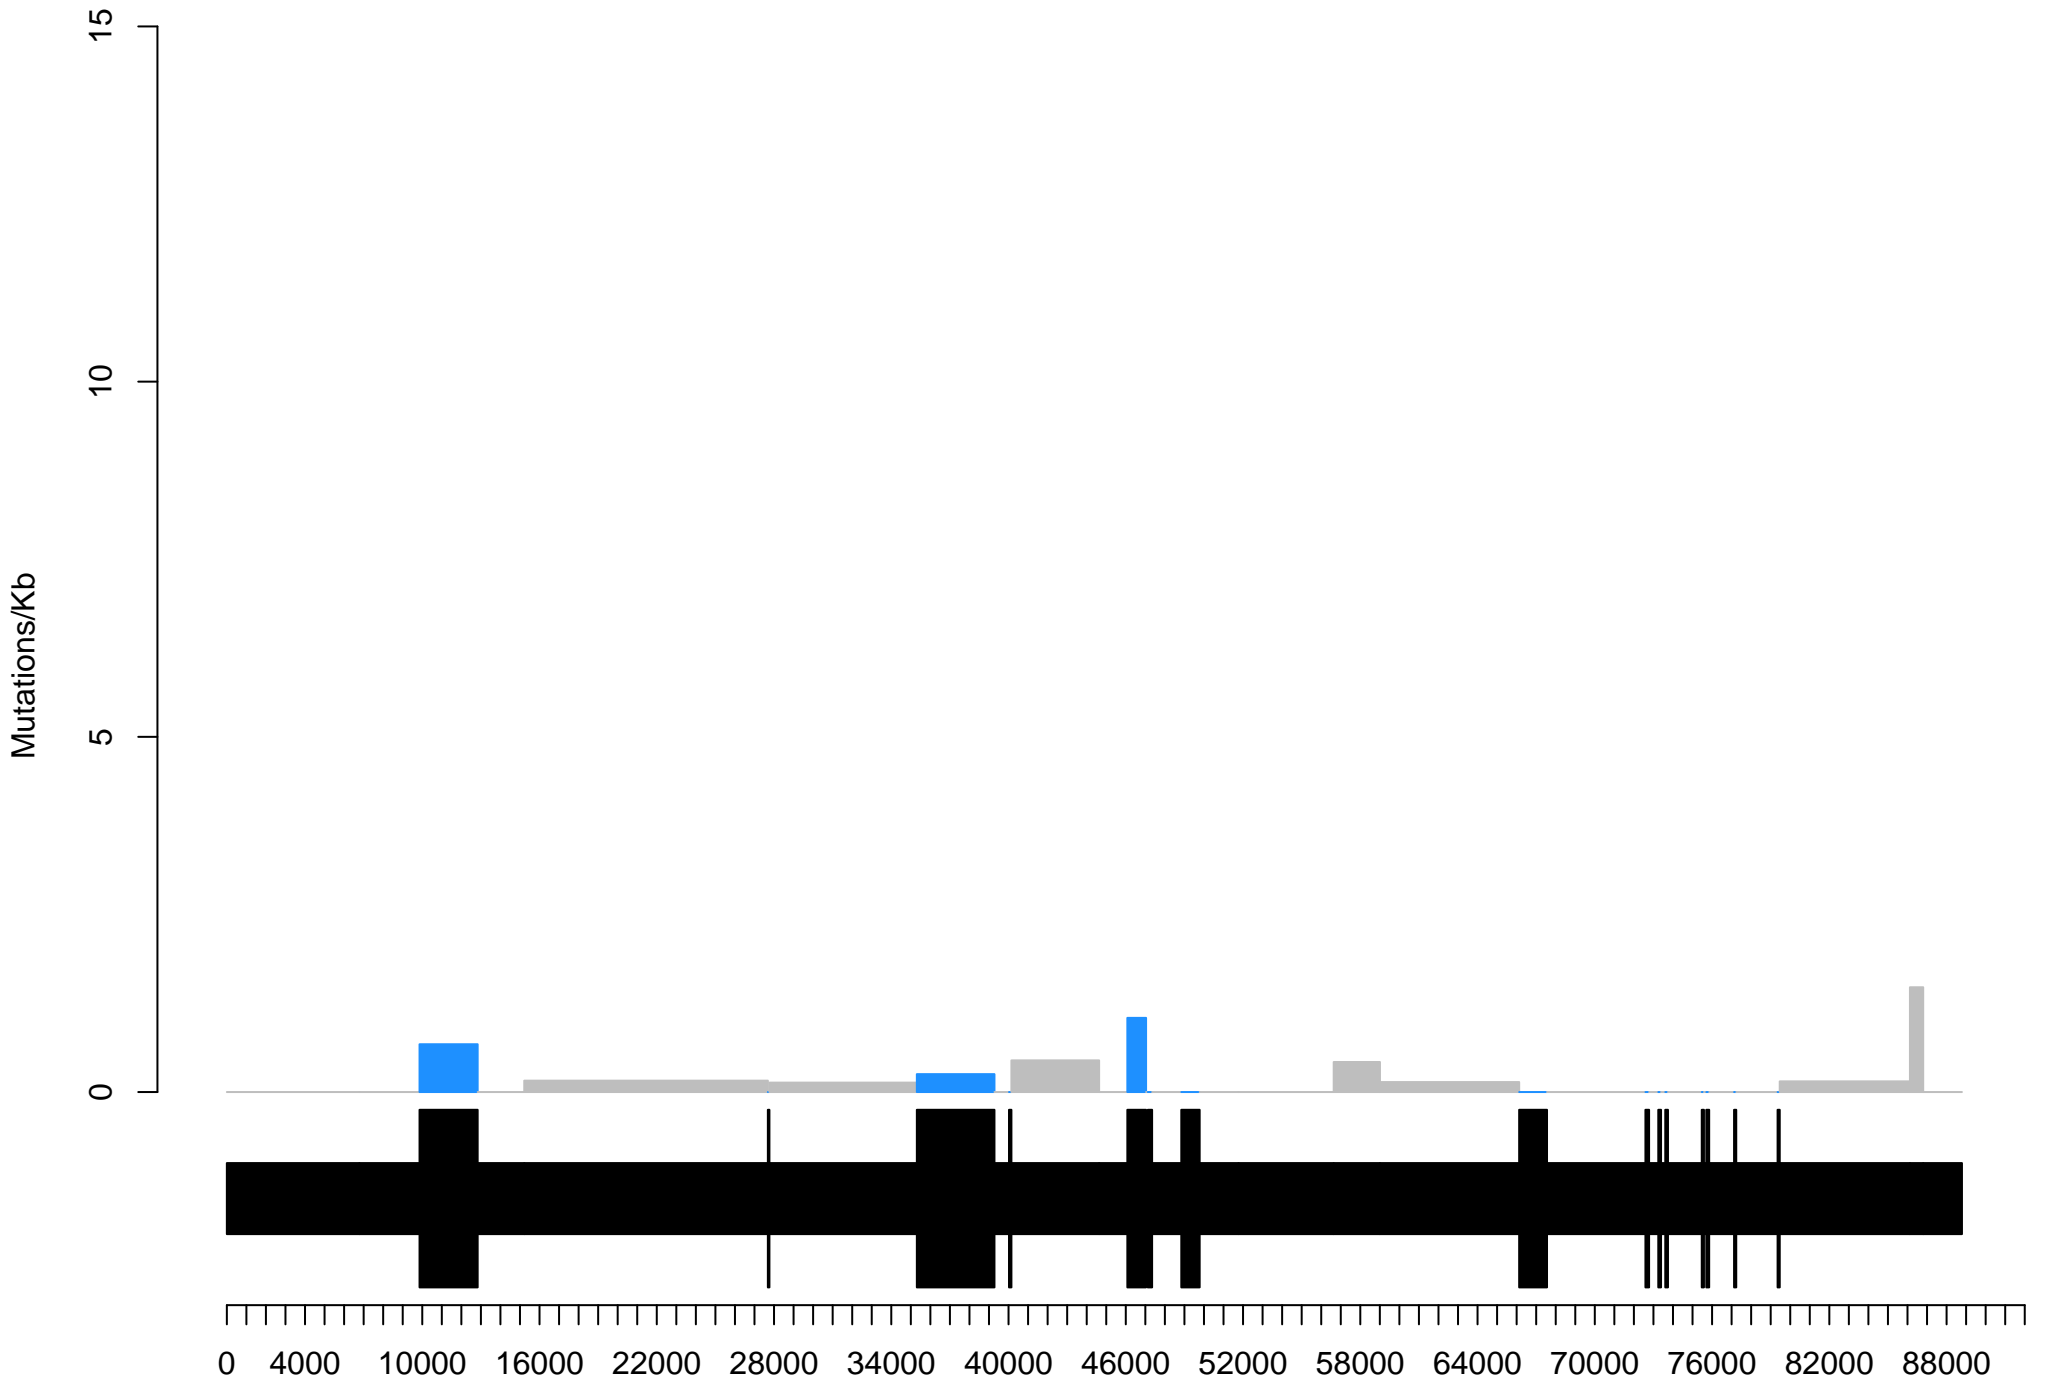

# ENSG00000248202 – PRAD

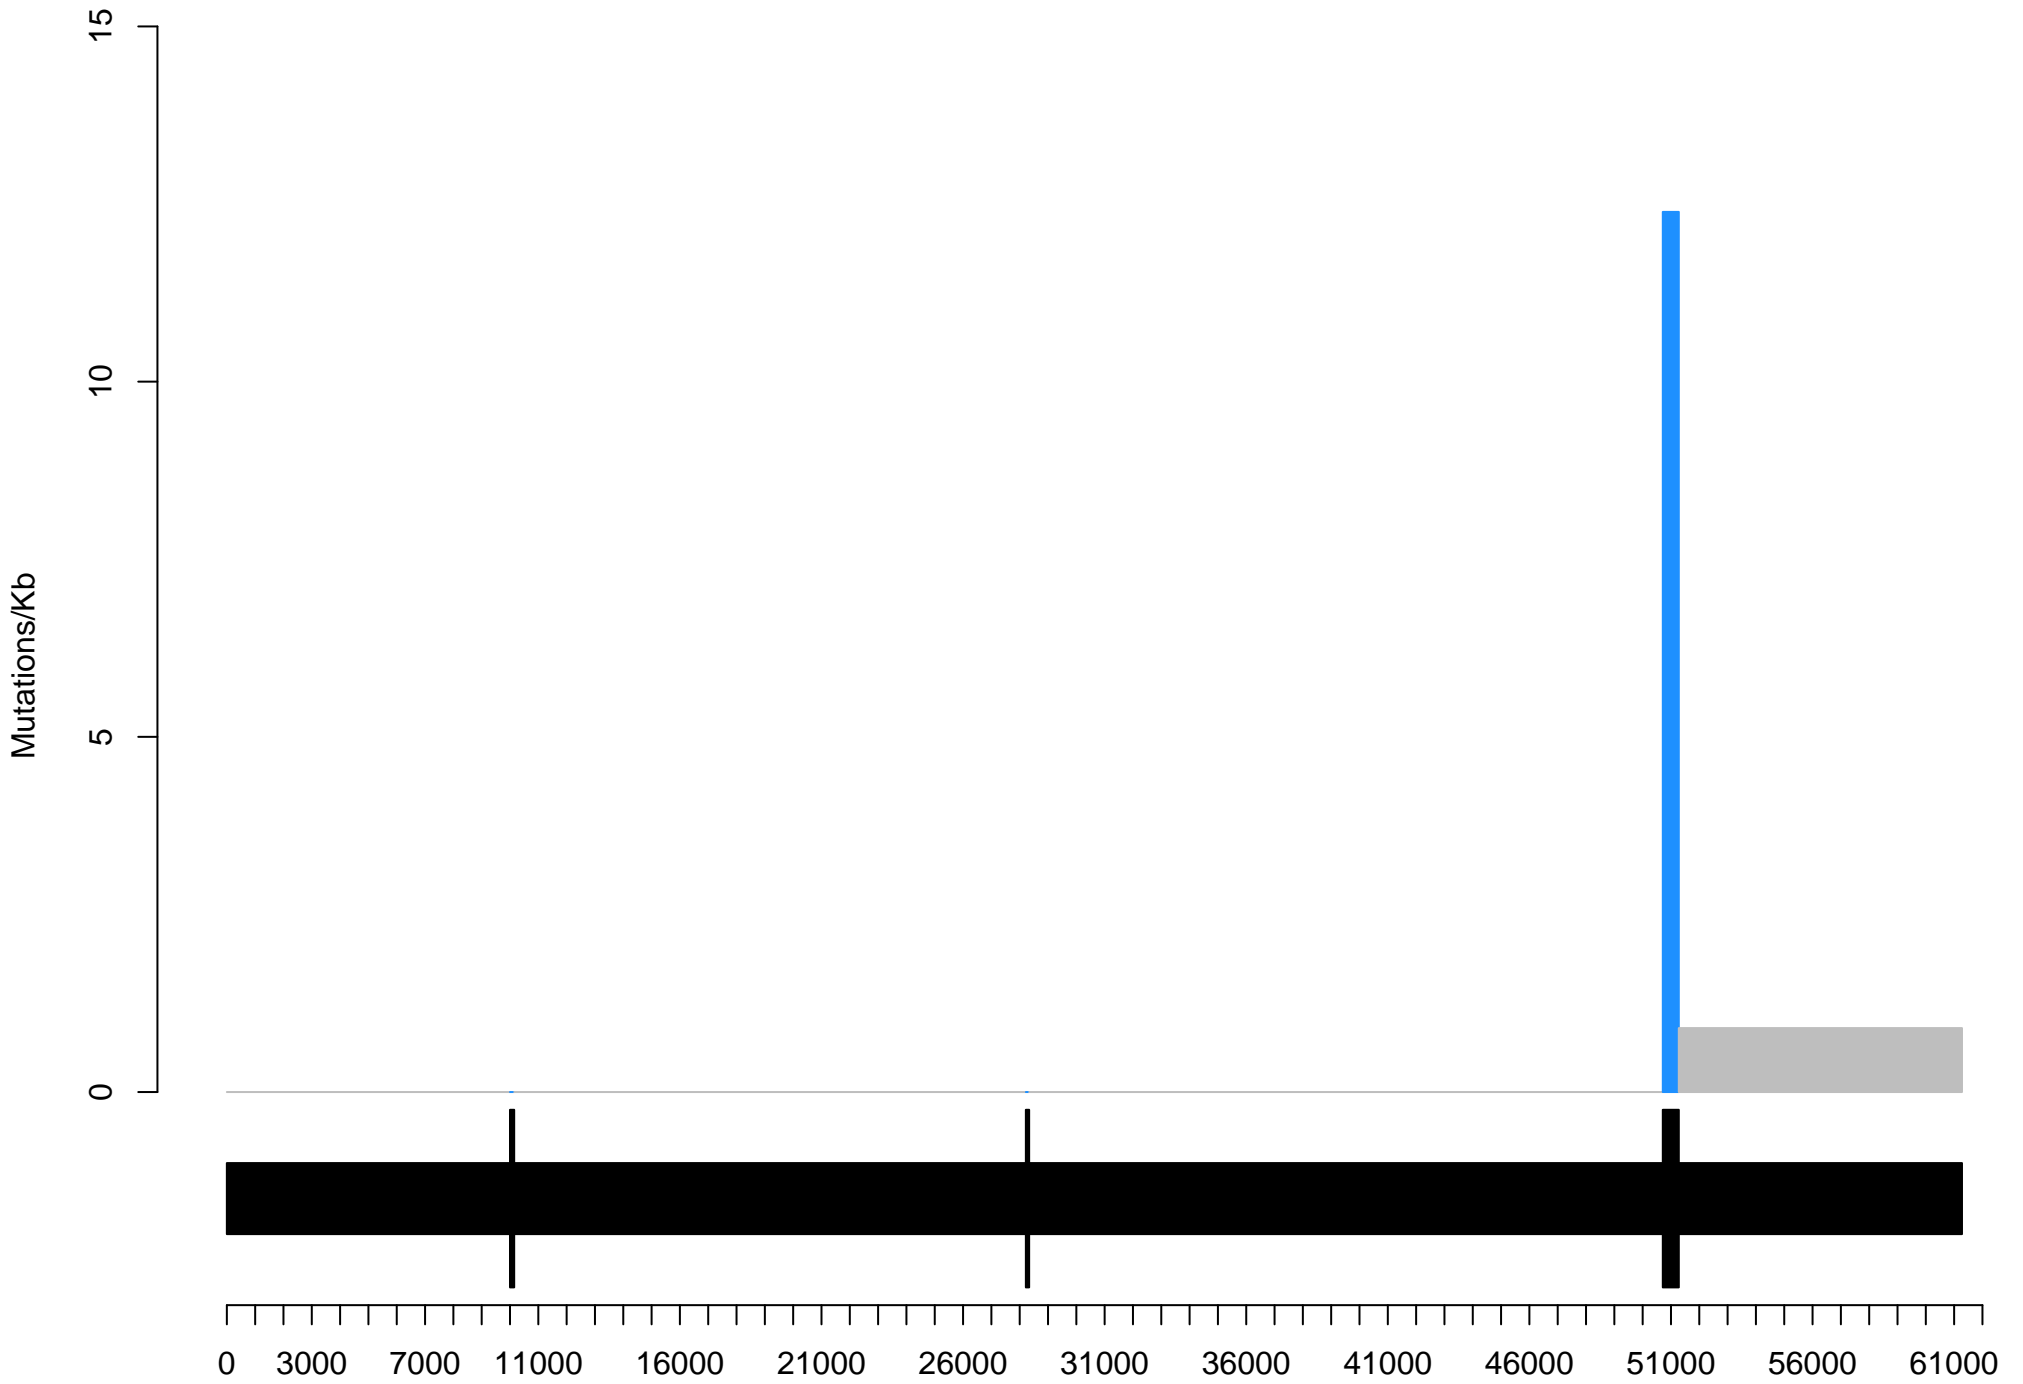

# ENSG00000249734 - KICH

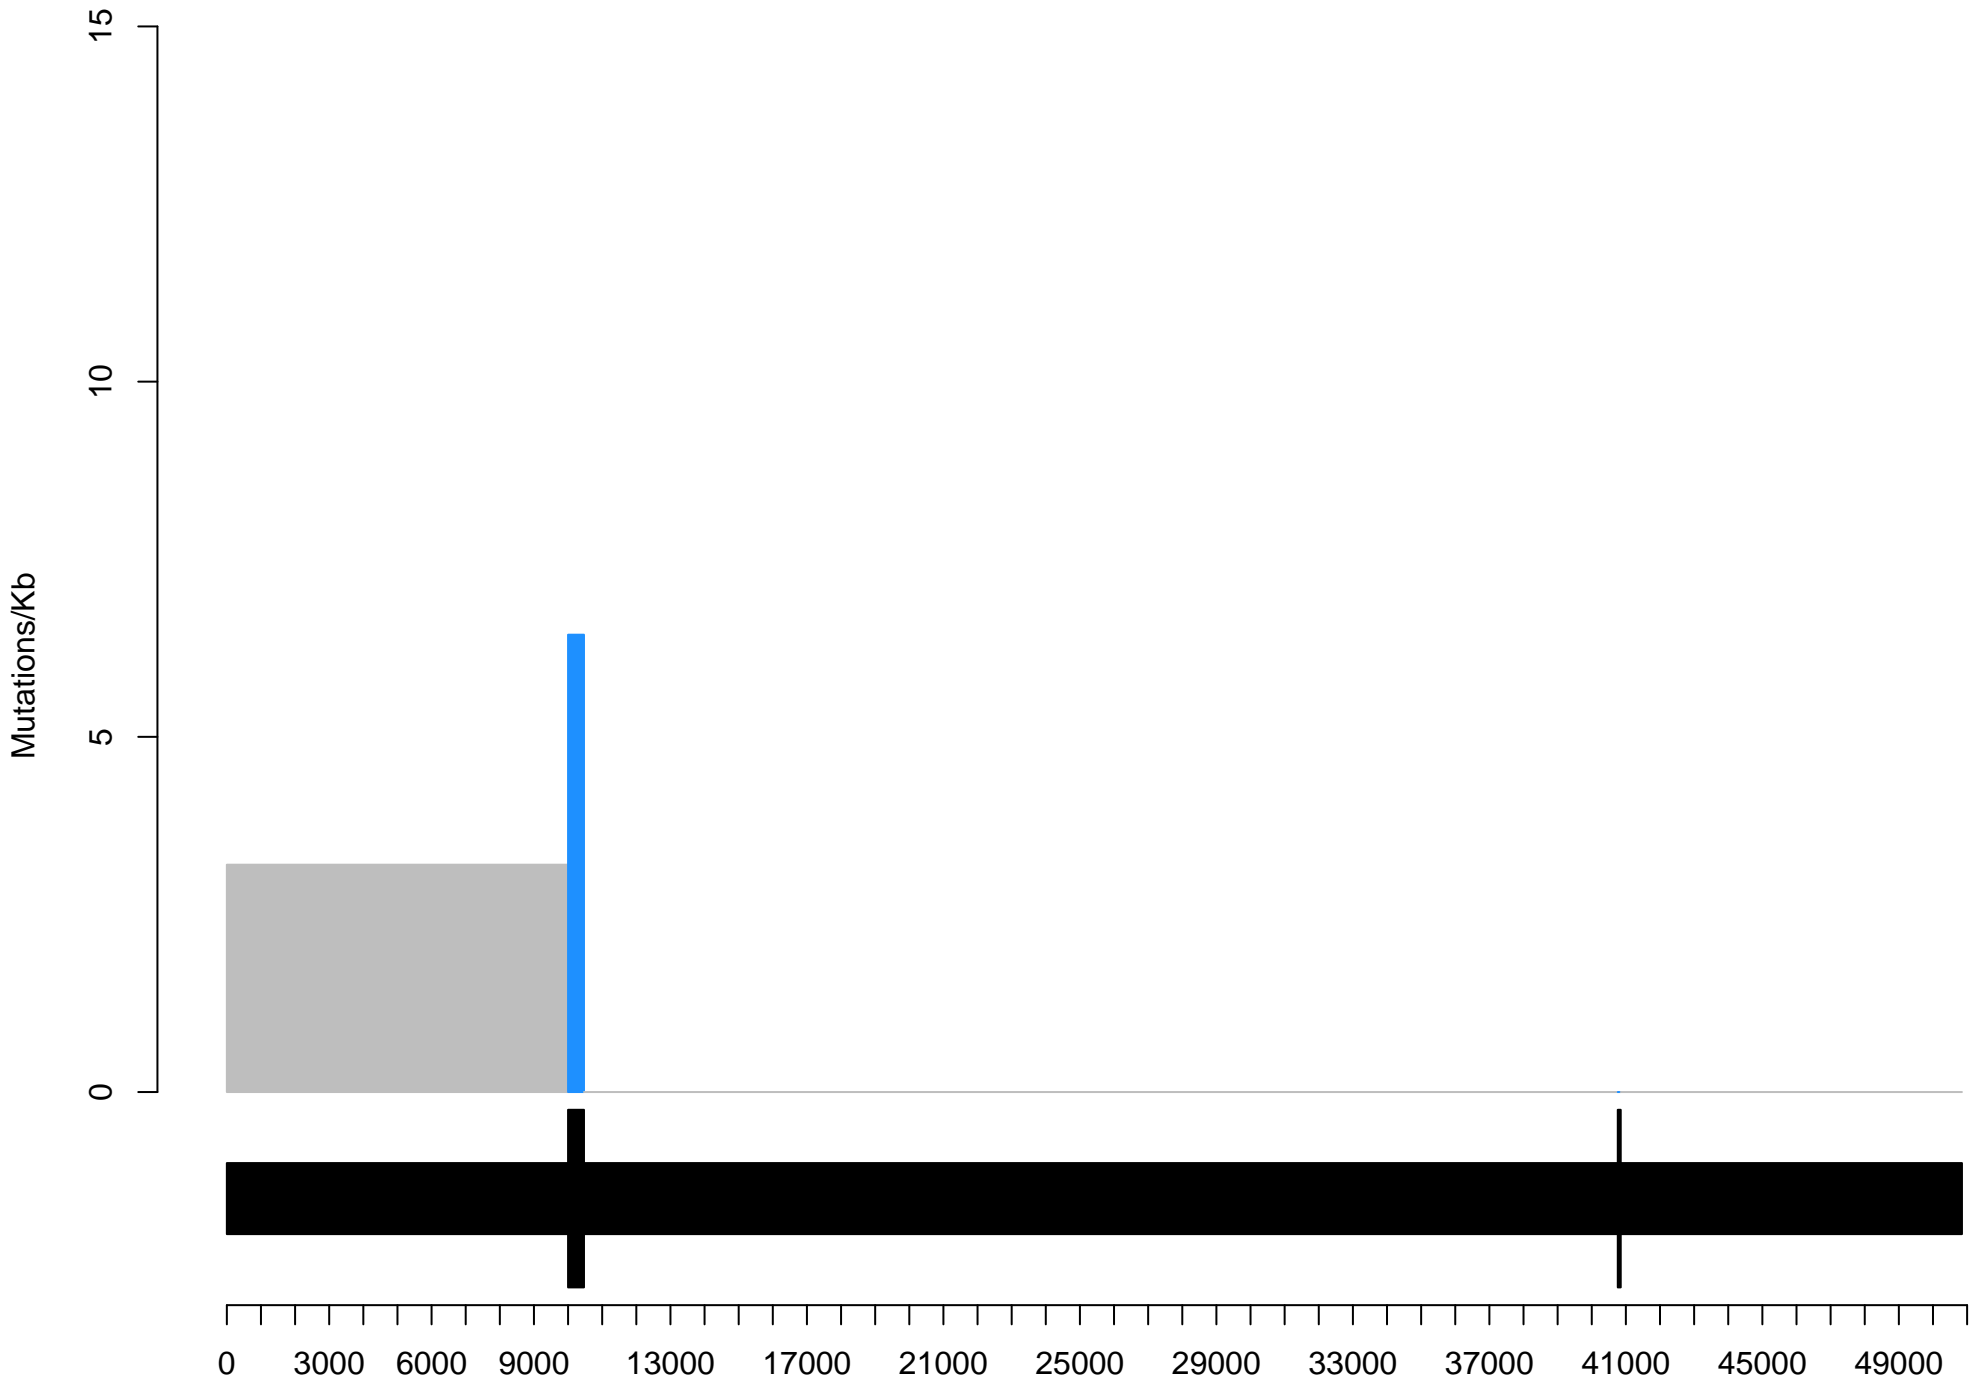

# ENSG00000250125 – Breast

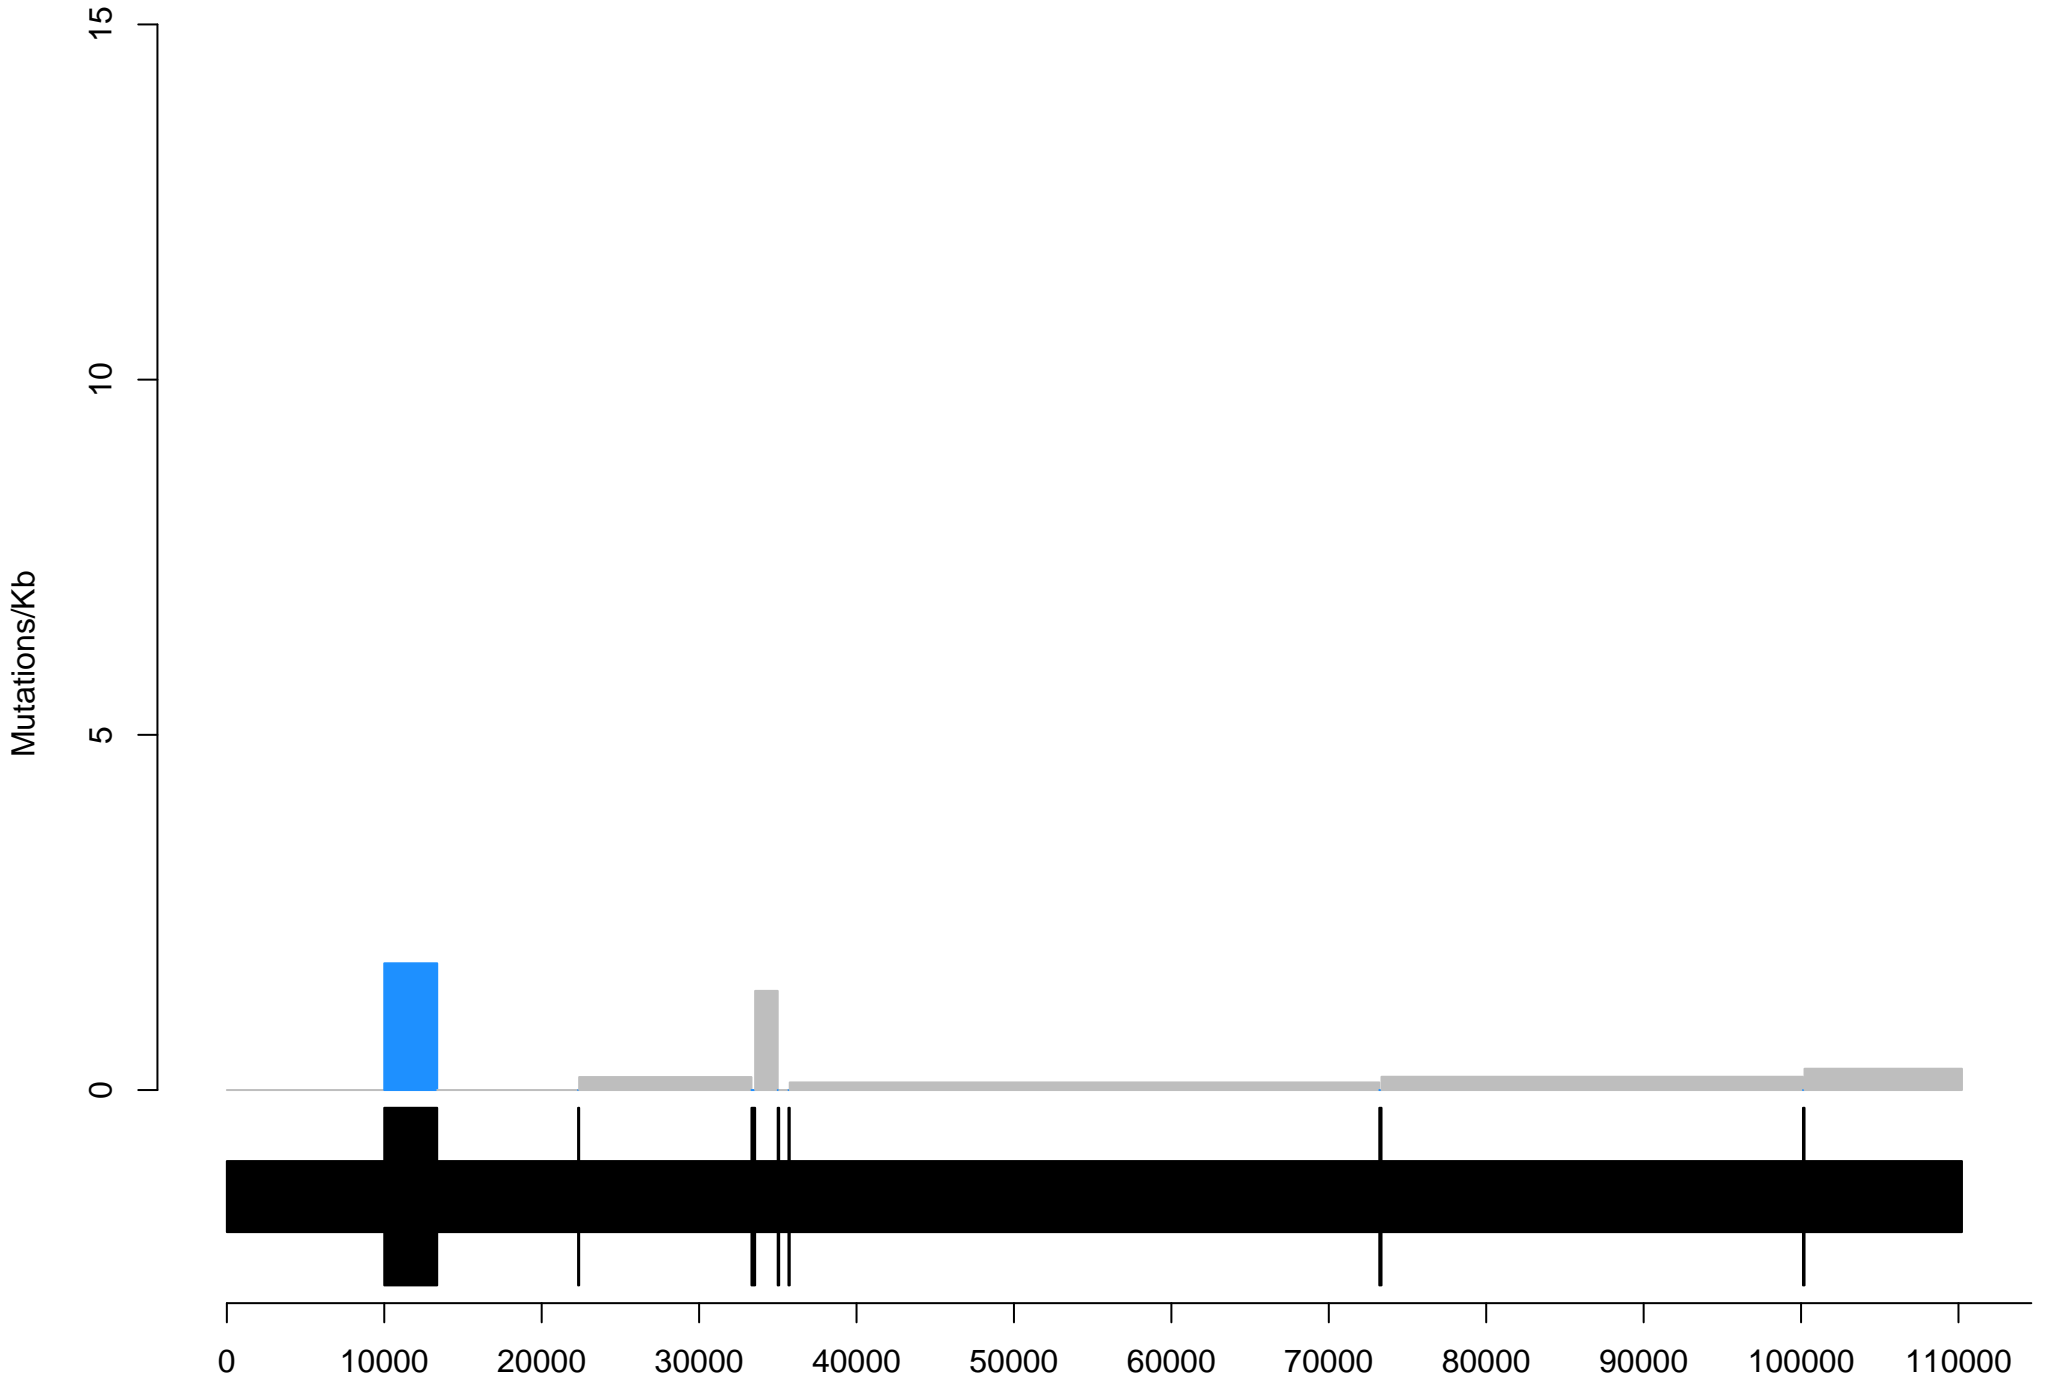

# ENSG00000250488 – KICH

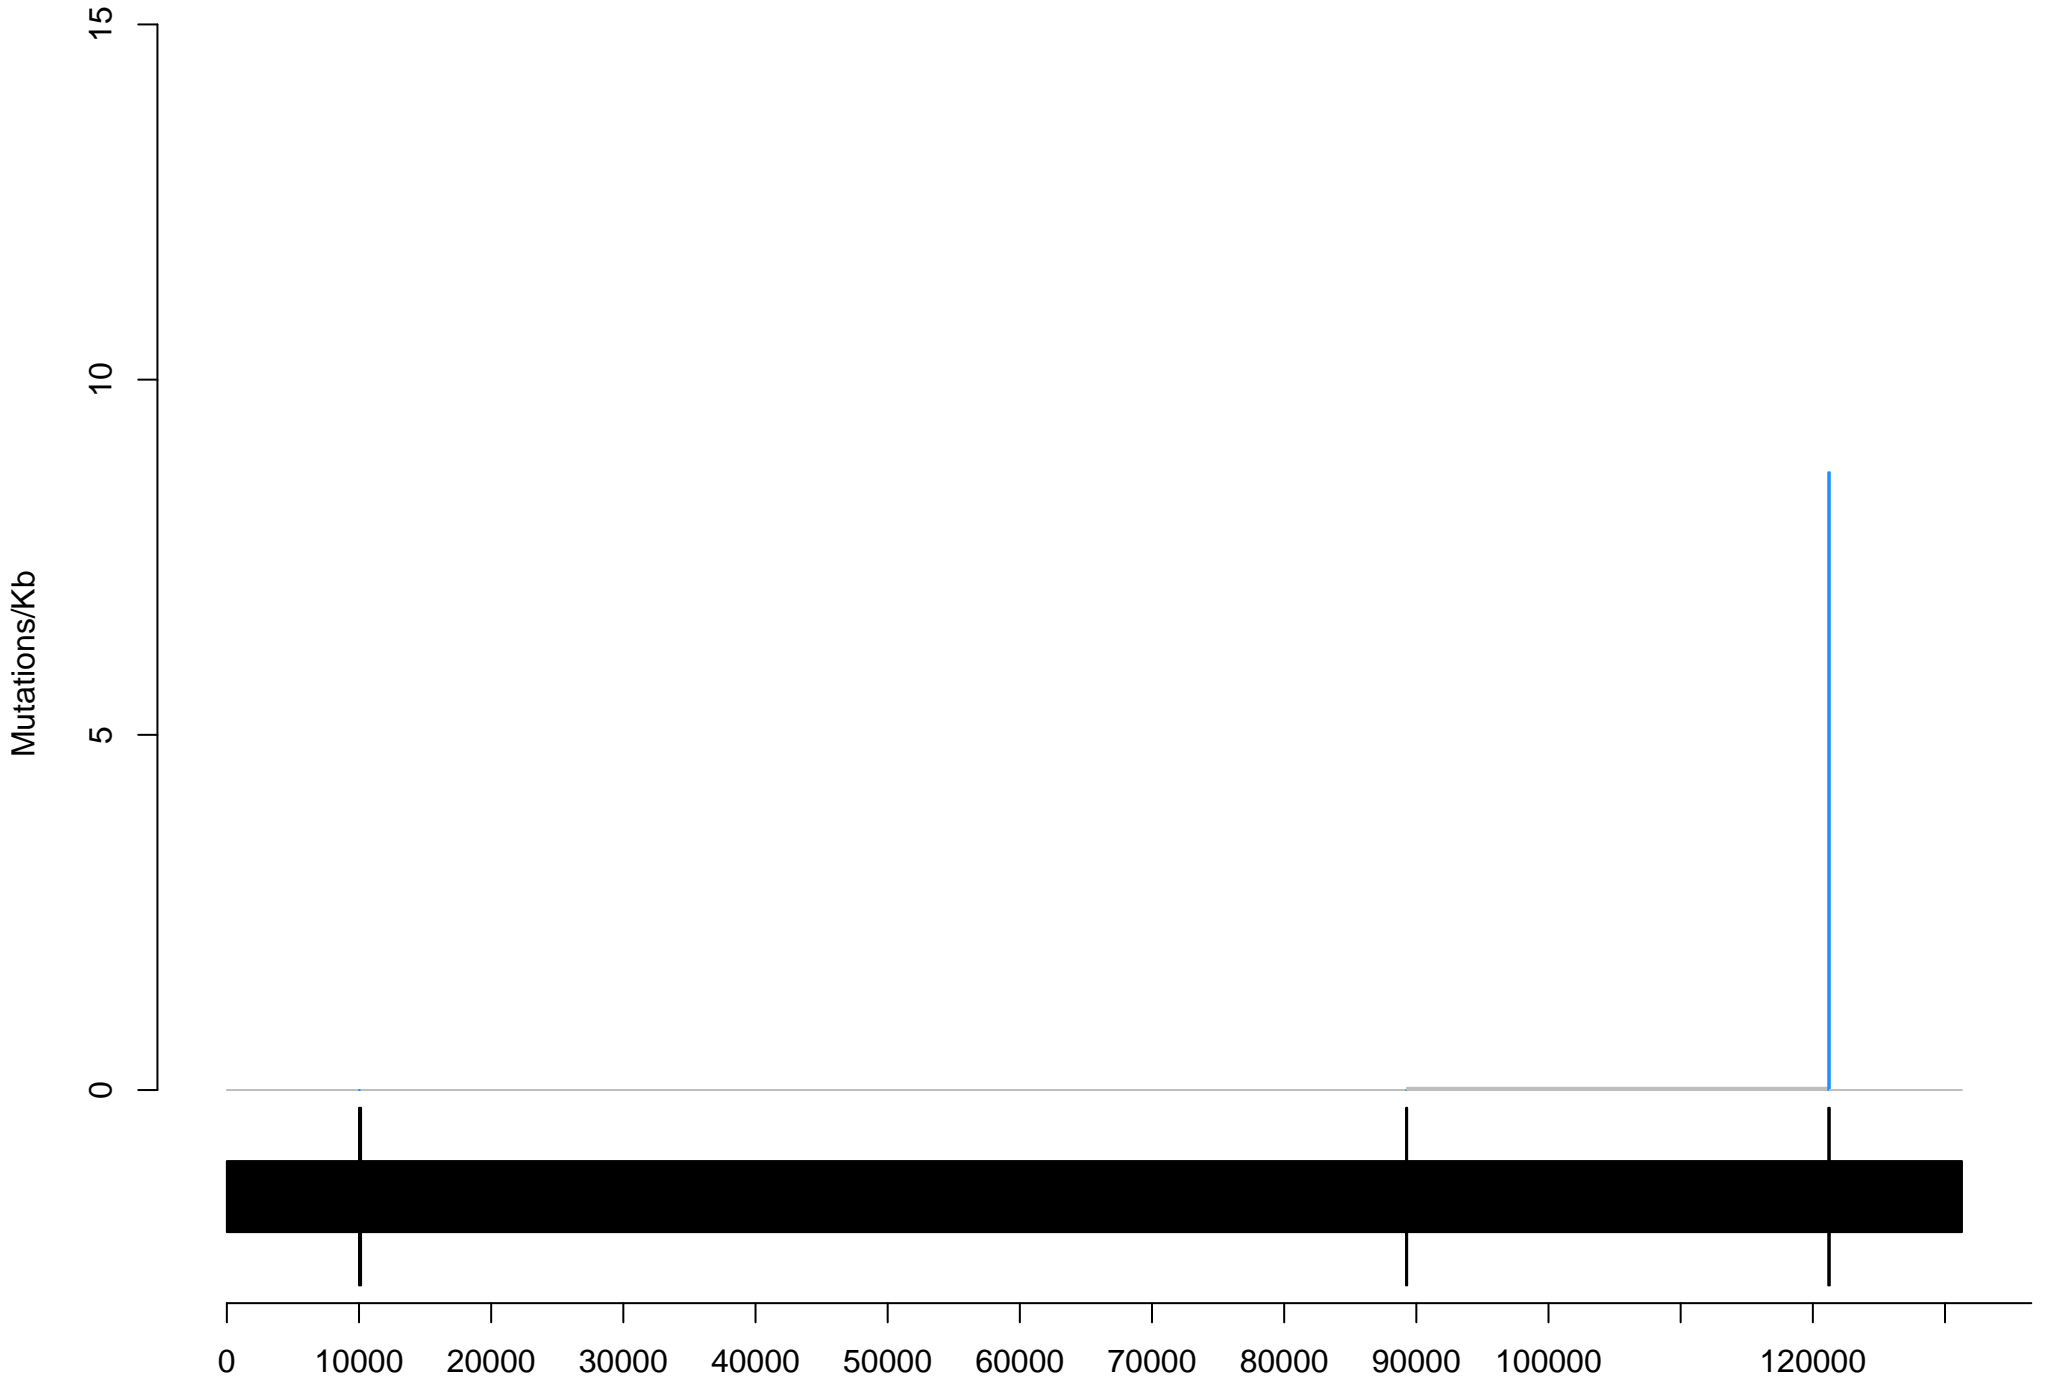

# ENSG00000253434 – Breast

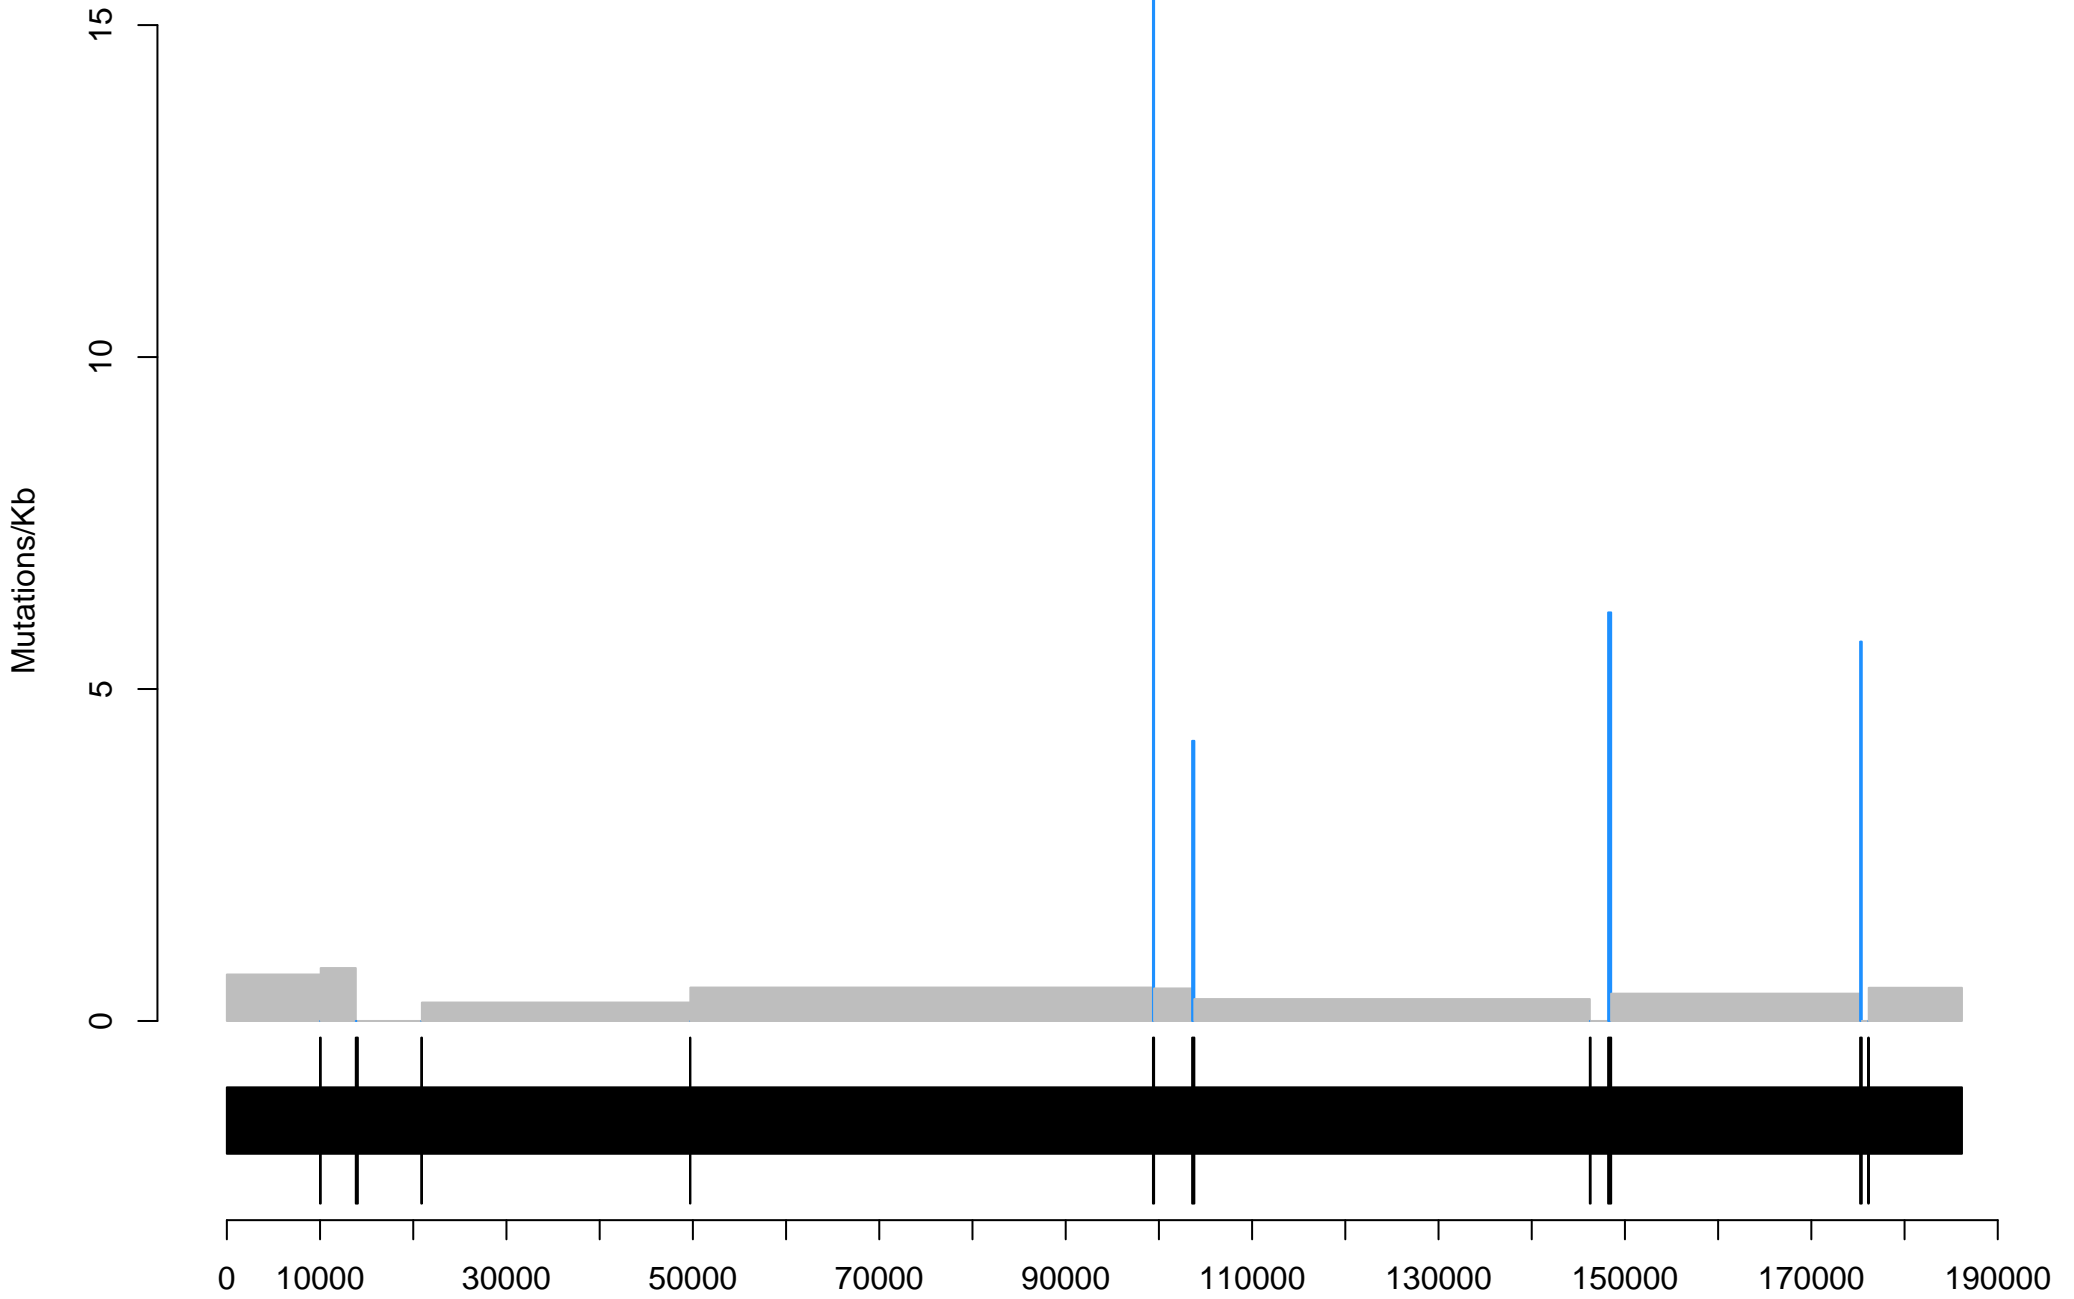

# ENSG00000254689 – HNSC

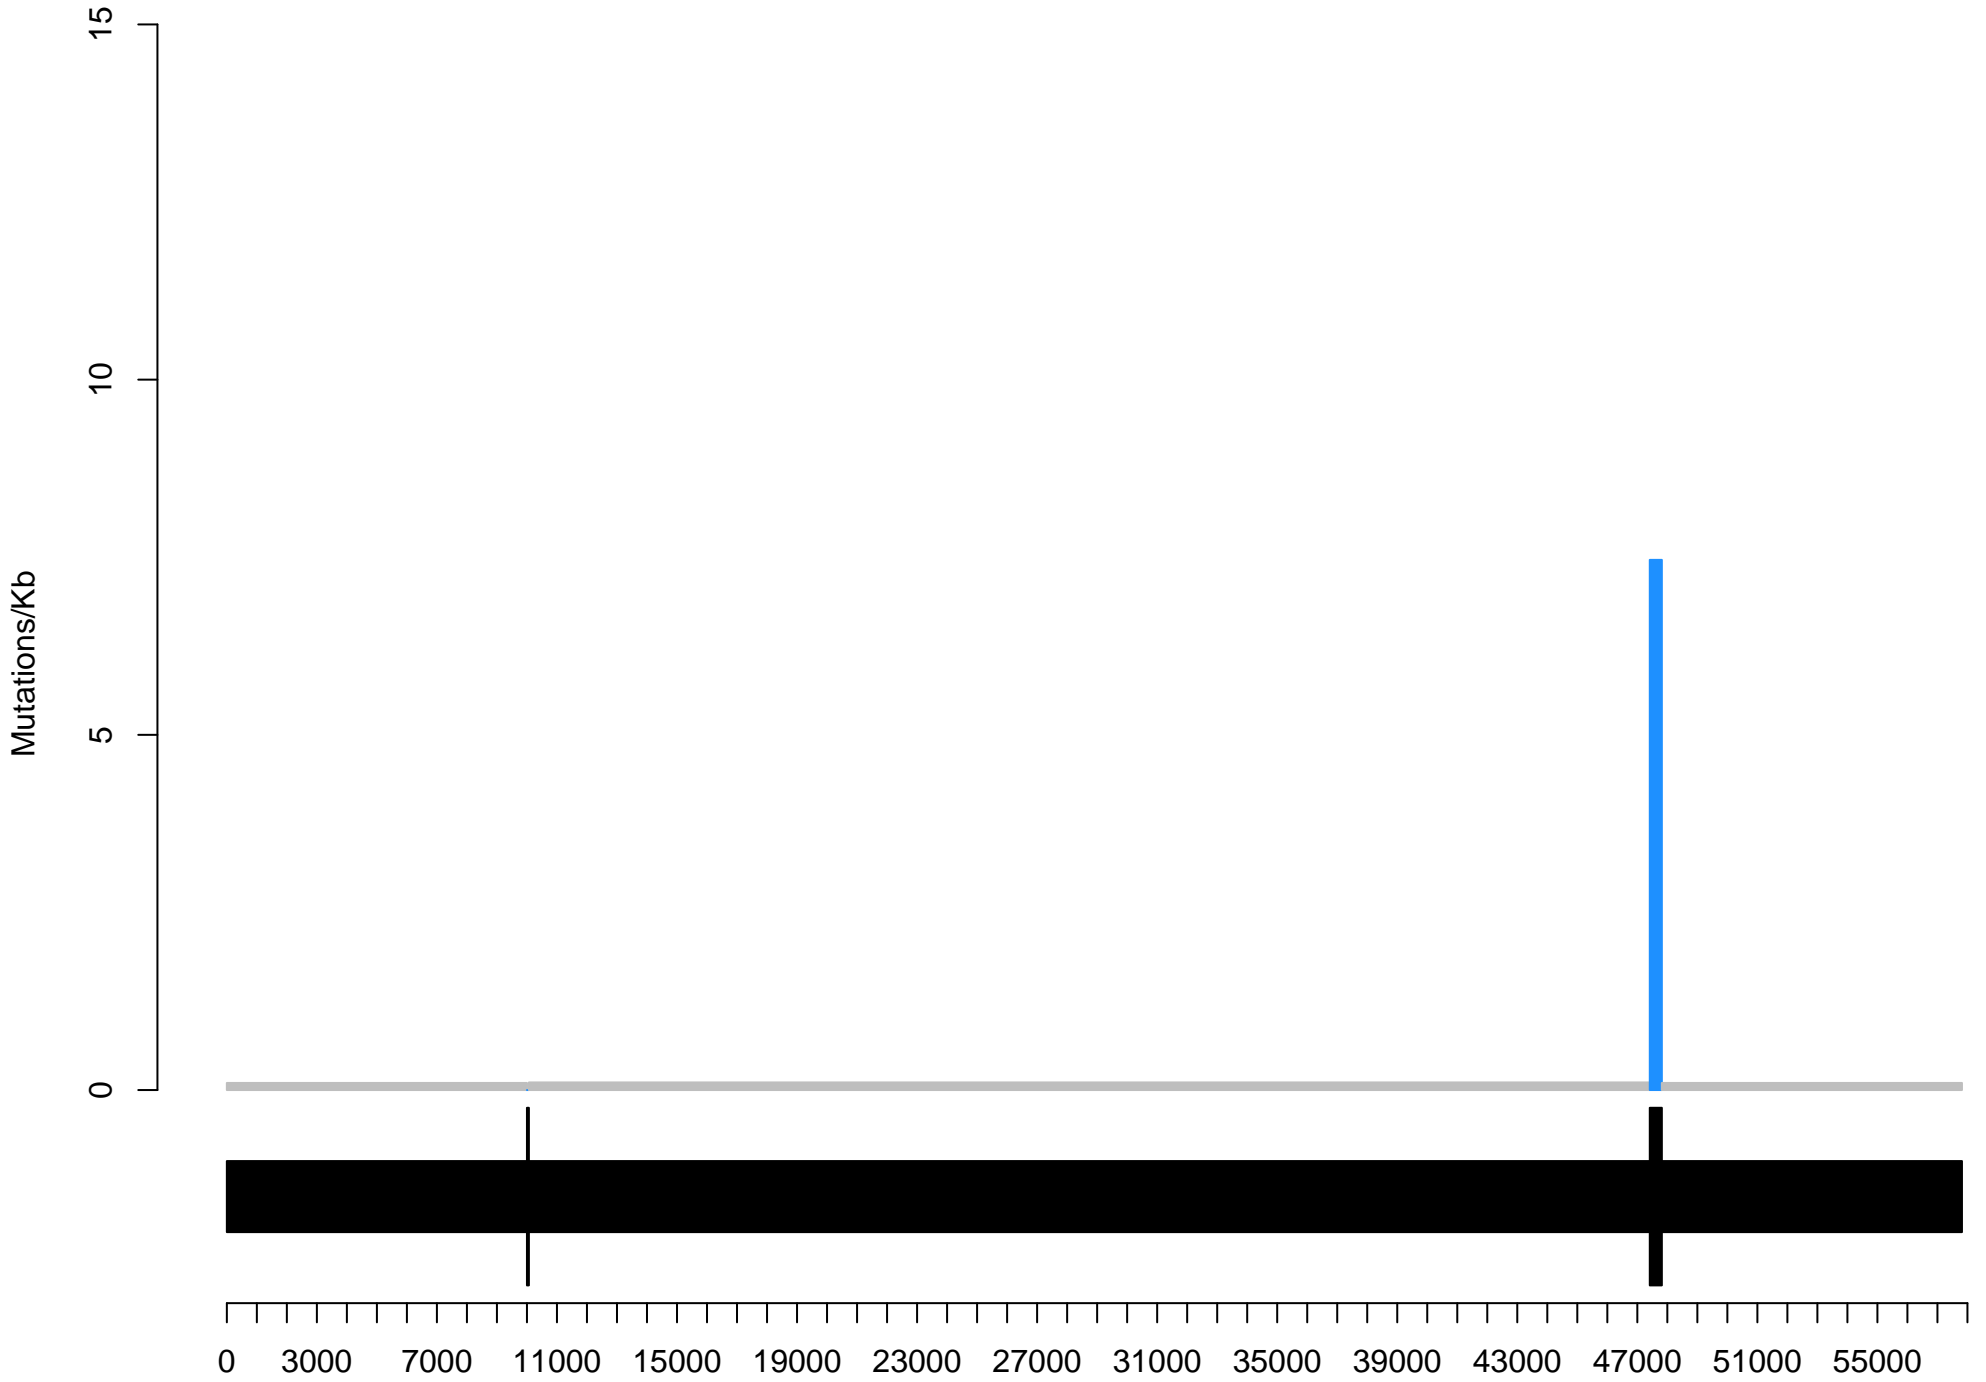

# ENSG00000261623 – BRCA

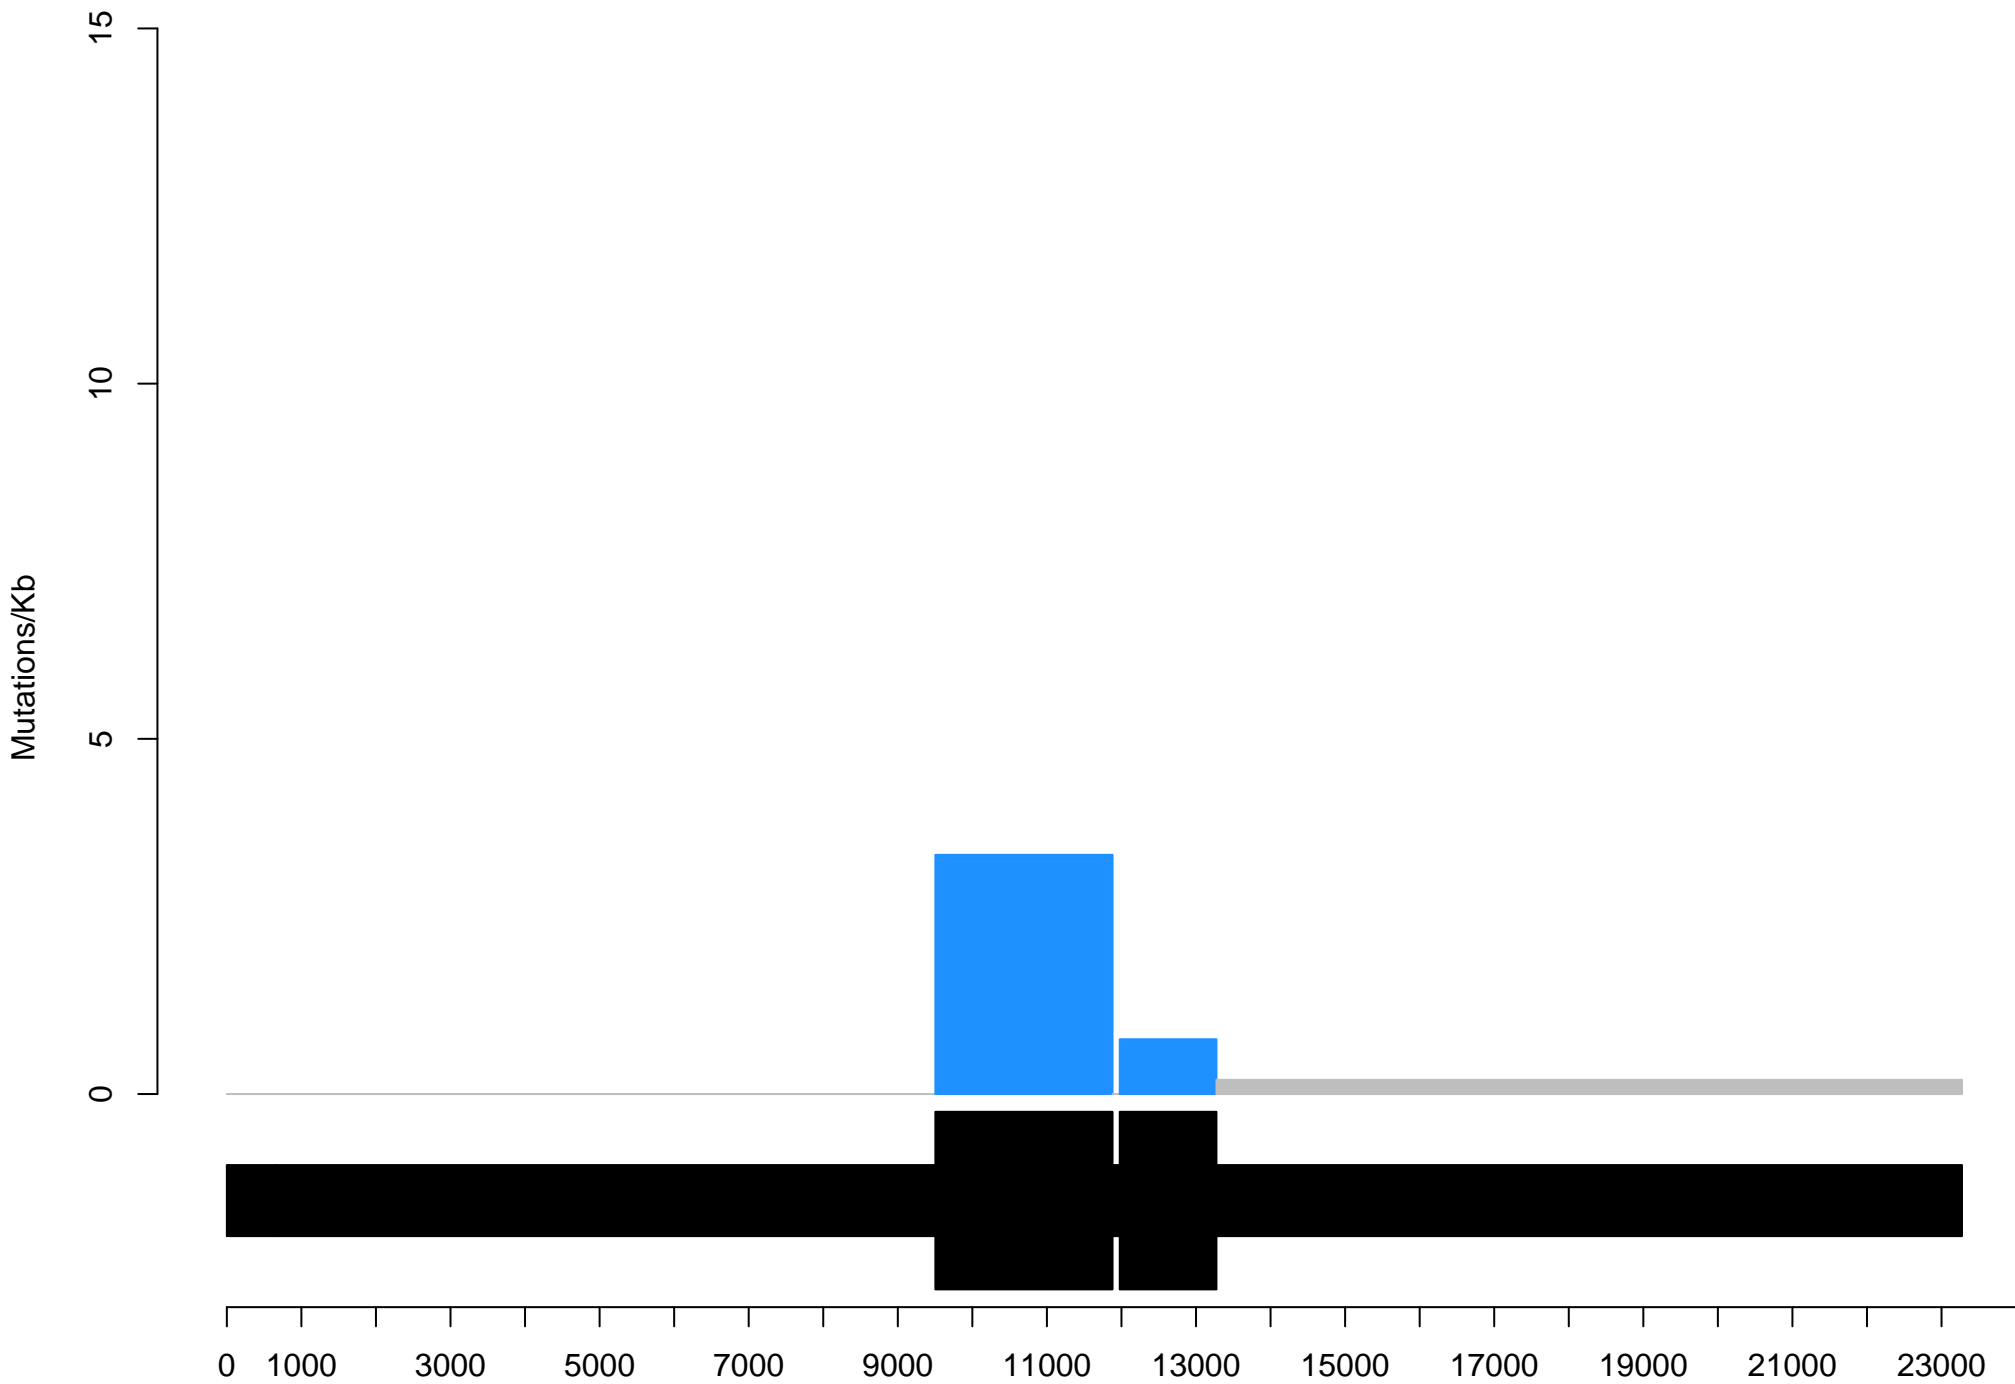



# ENSG00000262117 – SKCM

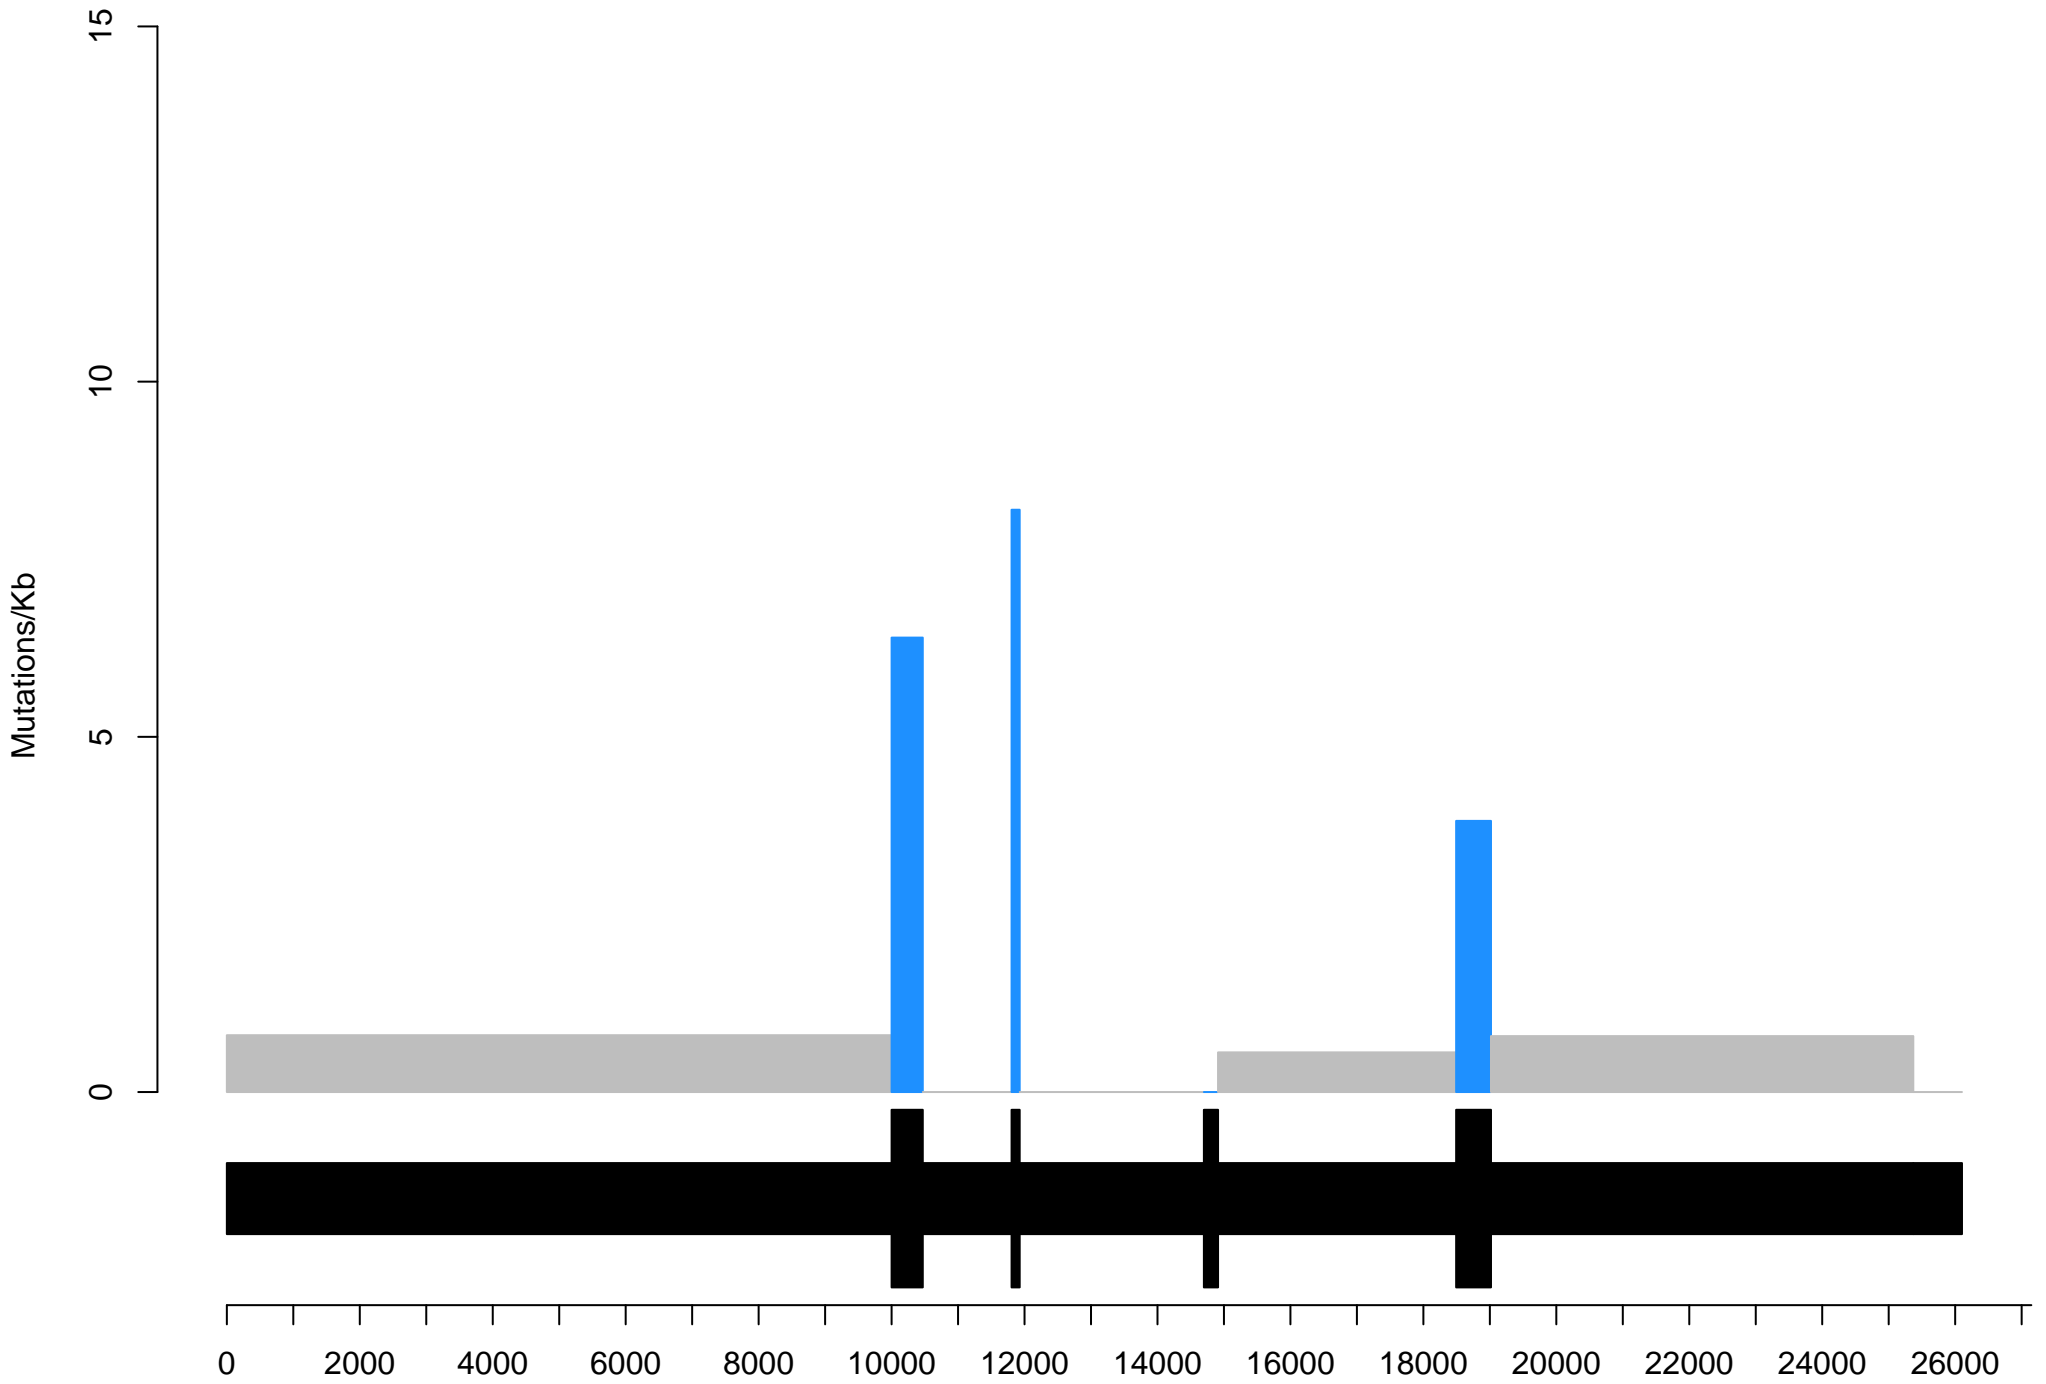

# ENSG00000245532 - Pancancer TCGA

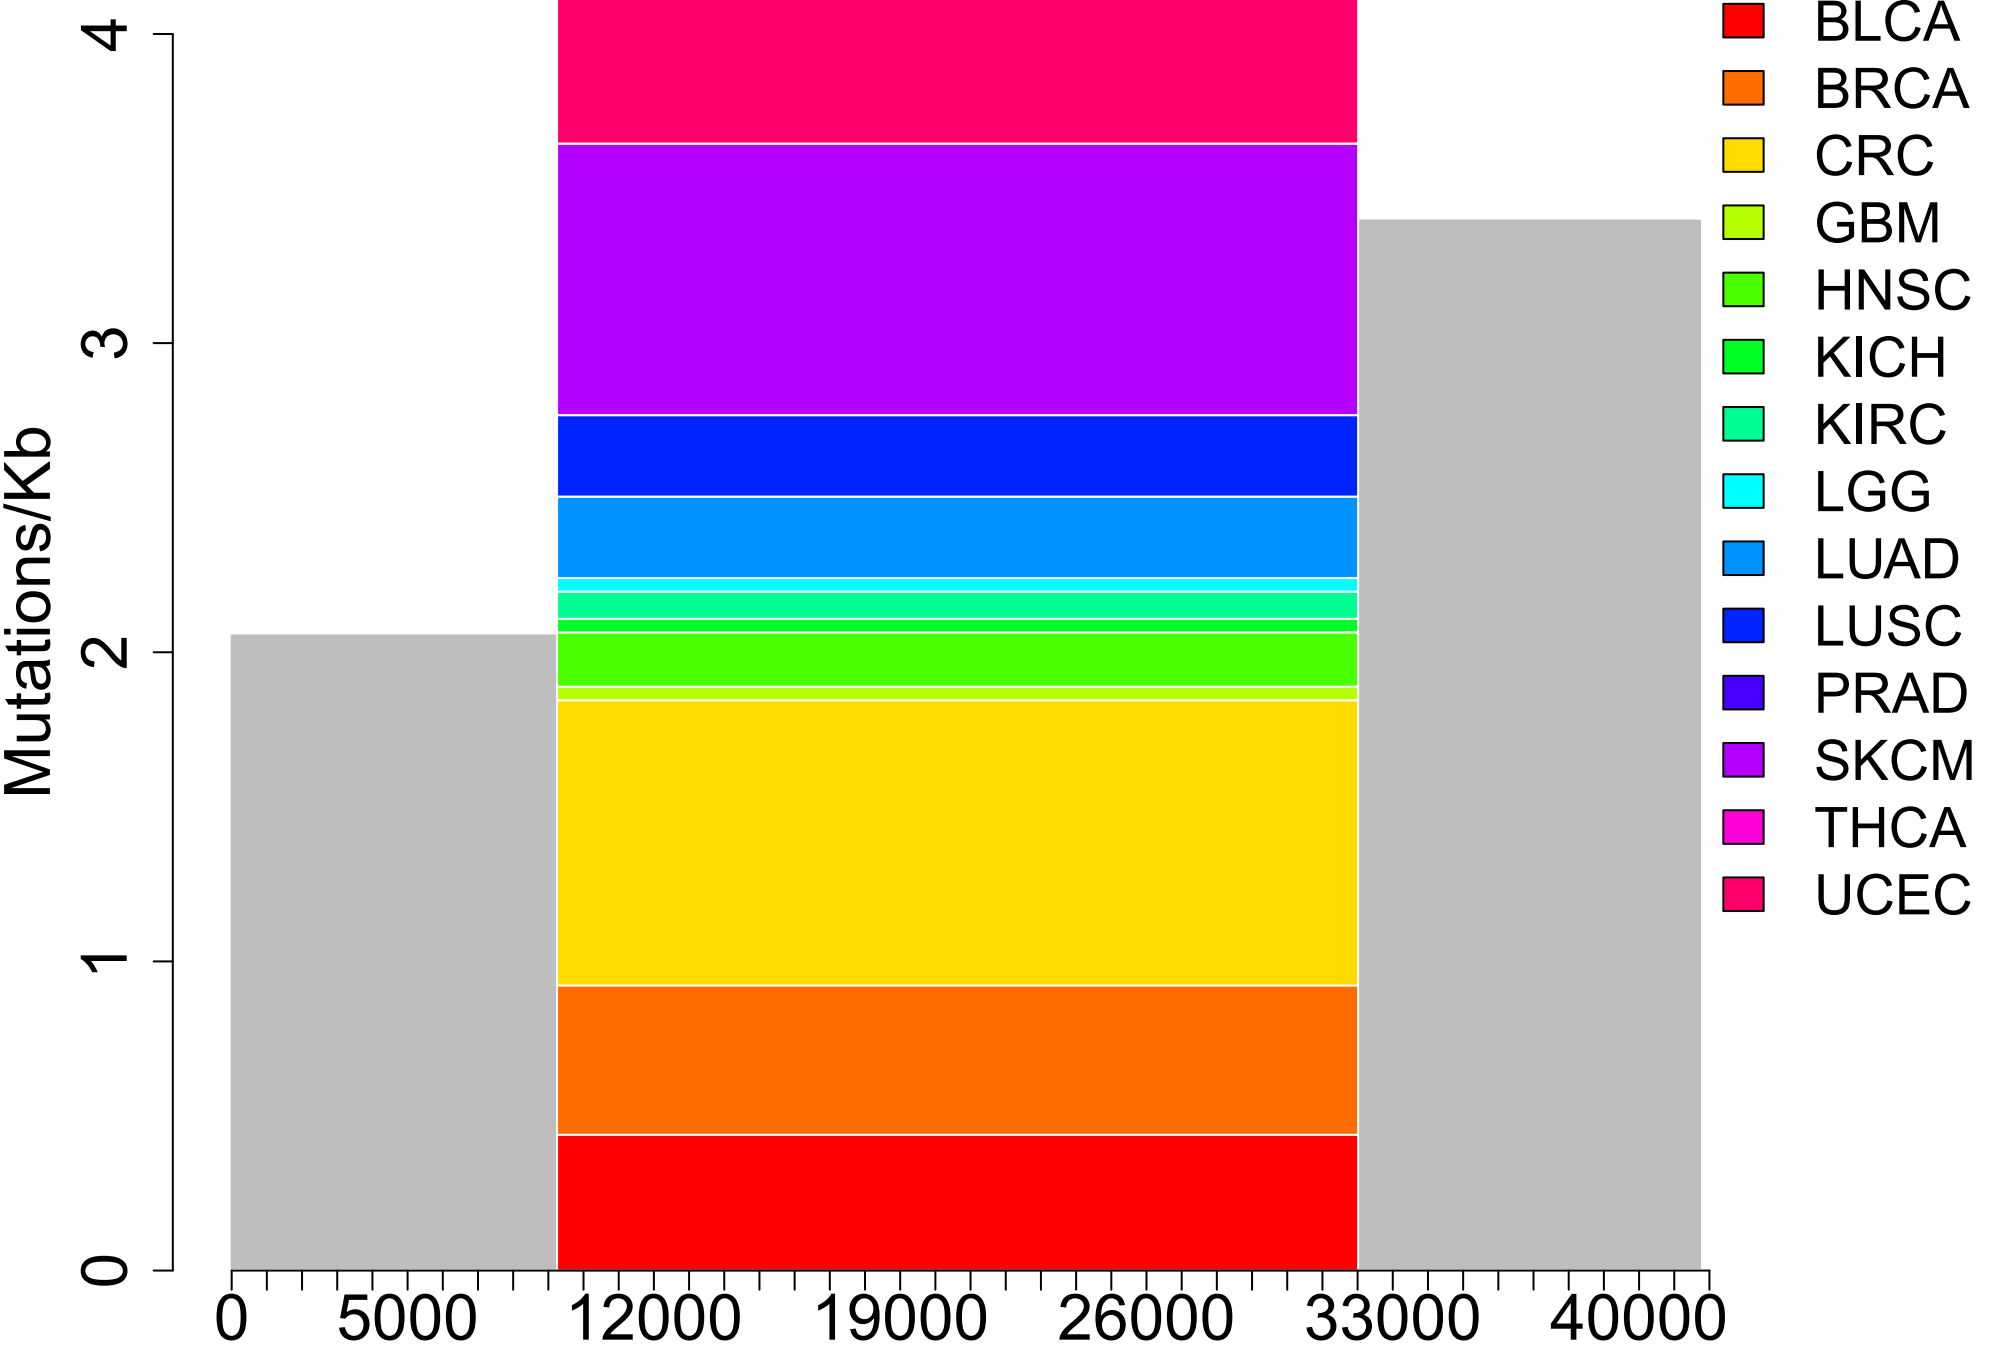

# ENSG00000245532 - Superpancancer

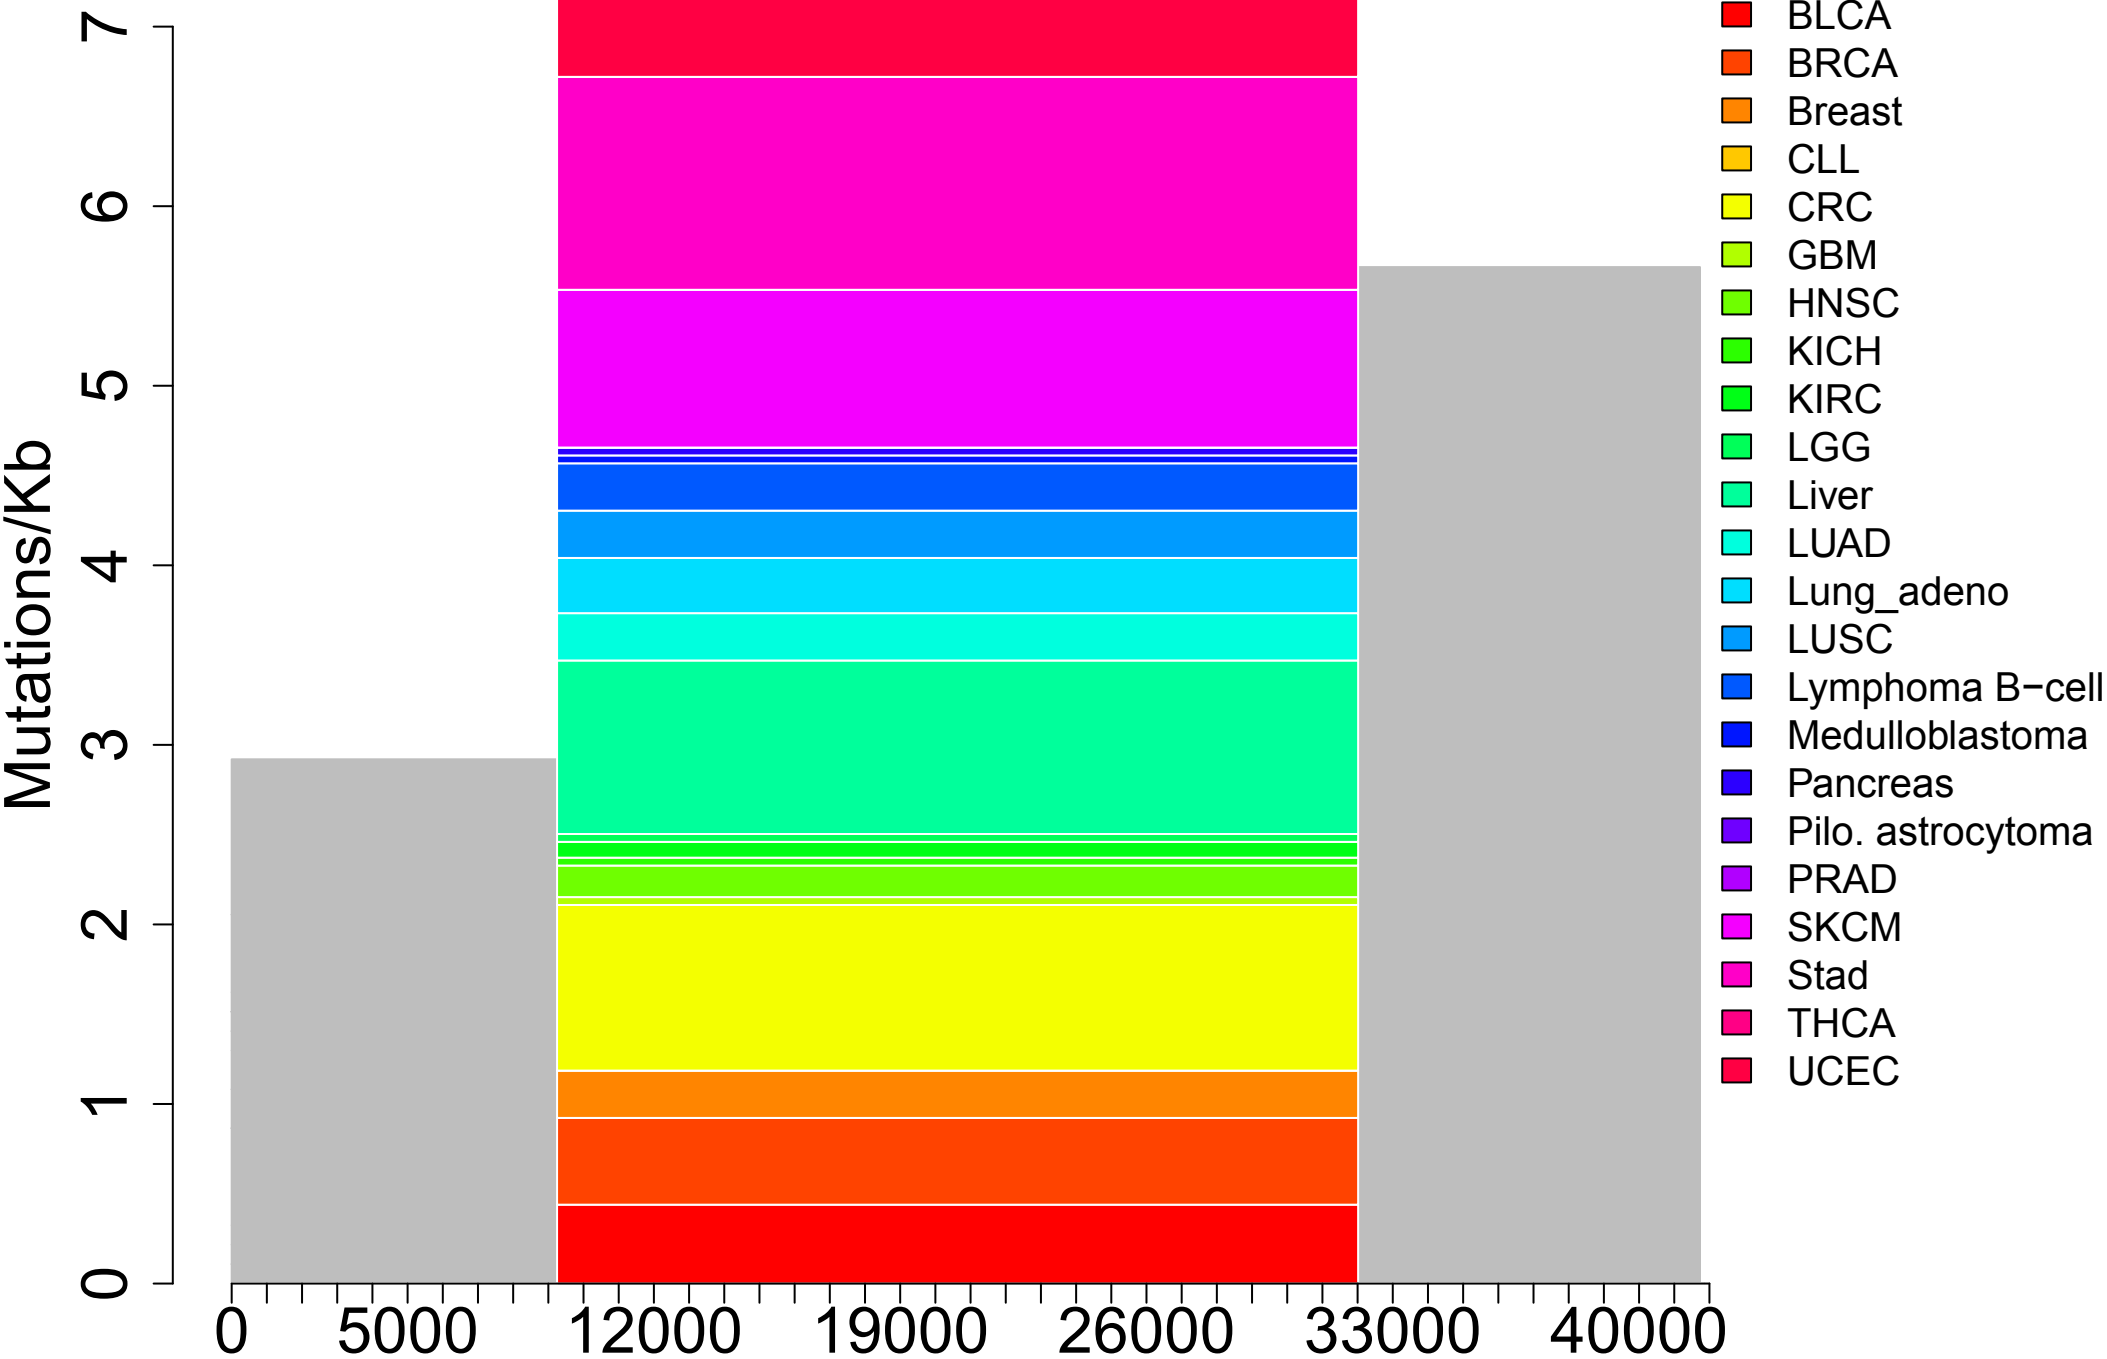

# ENSG00000251562 - Superpancancer

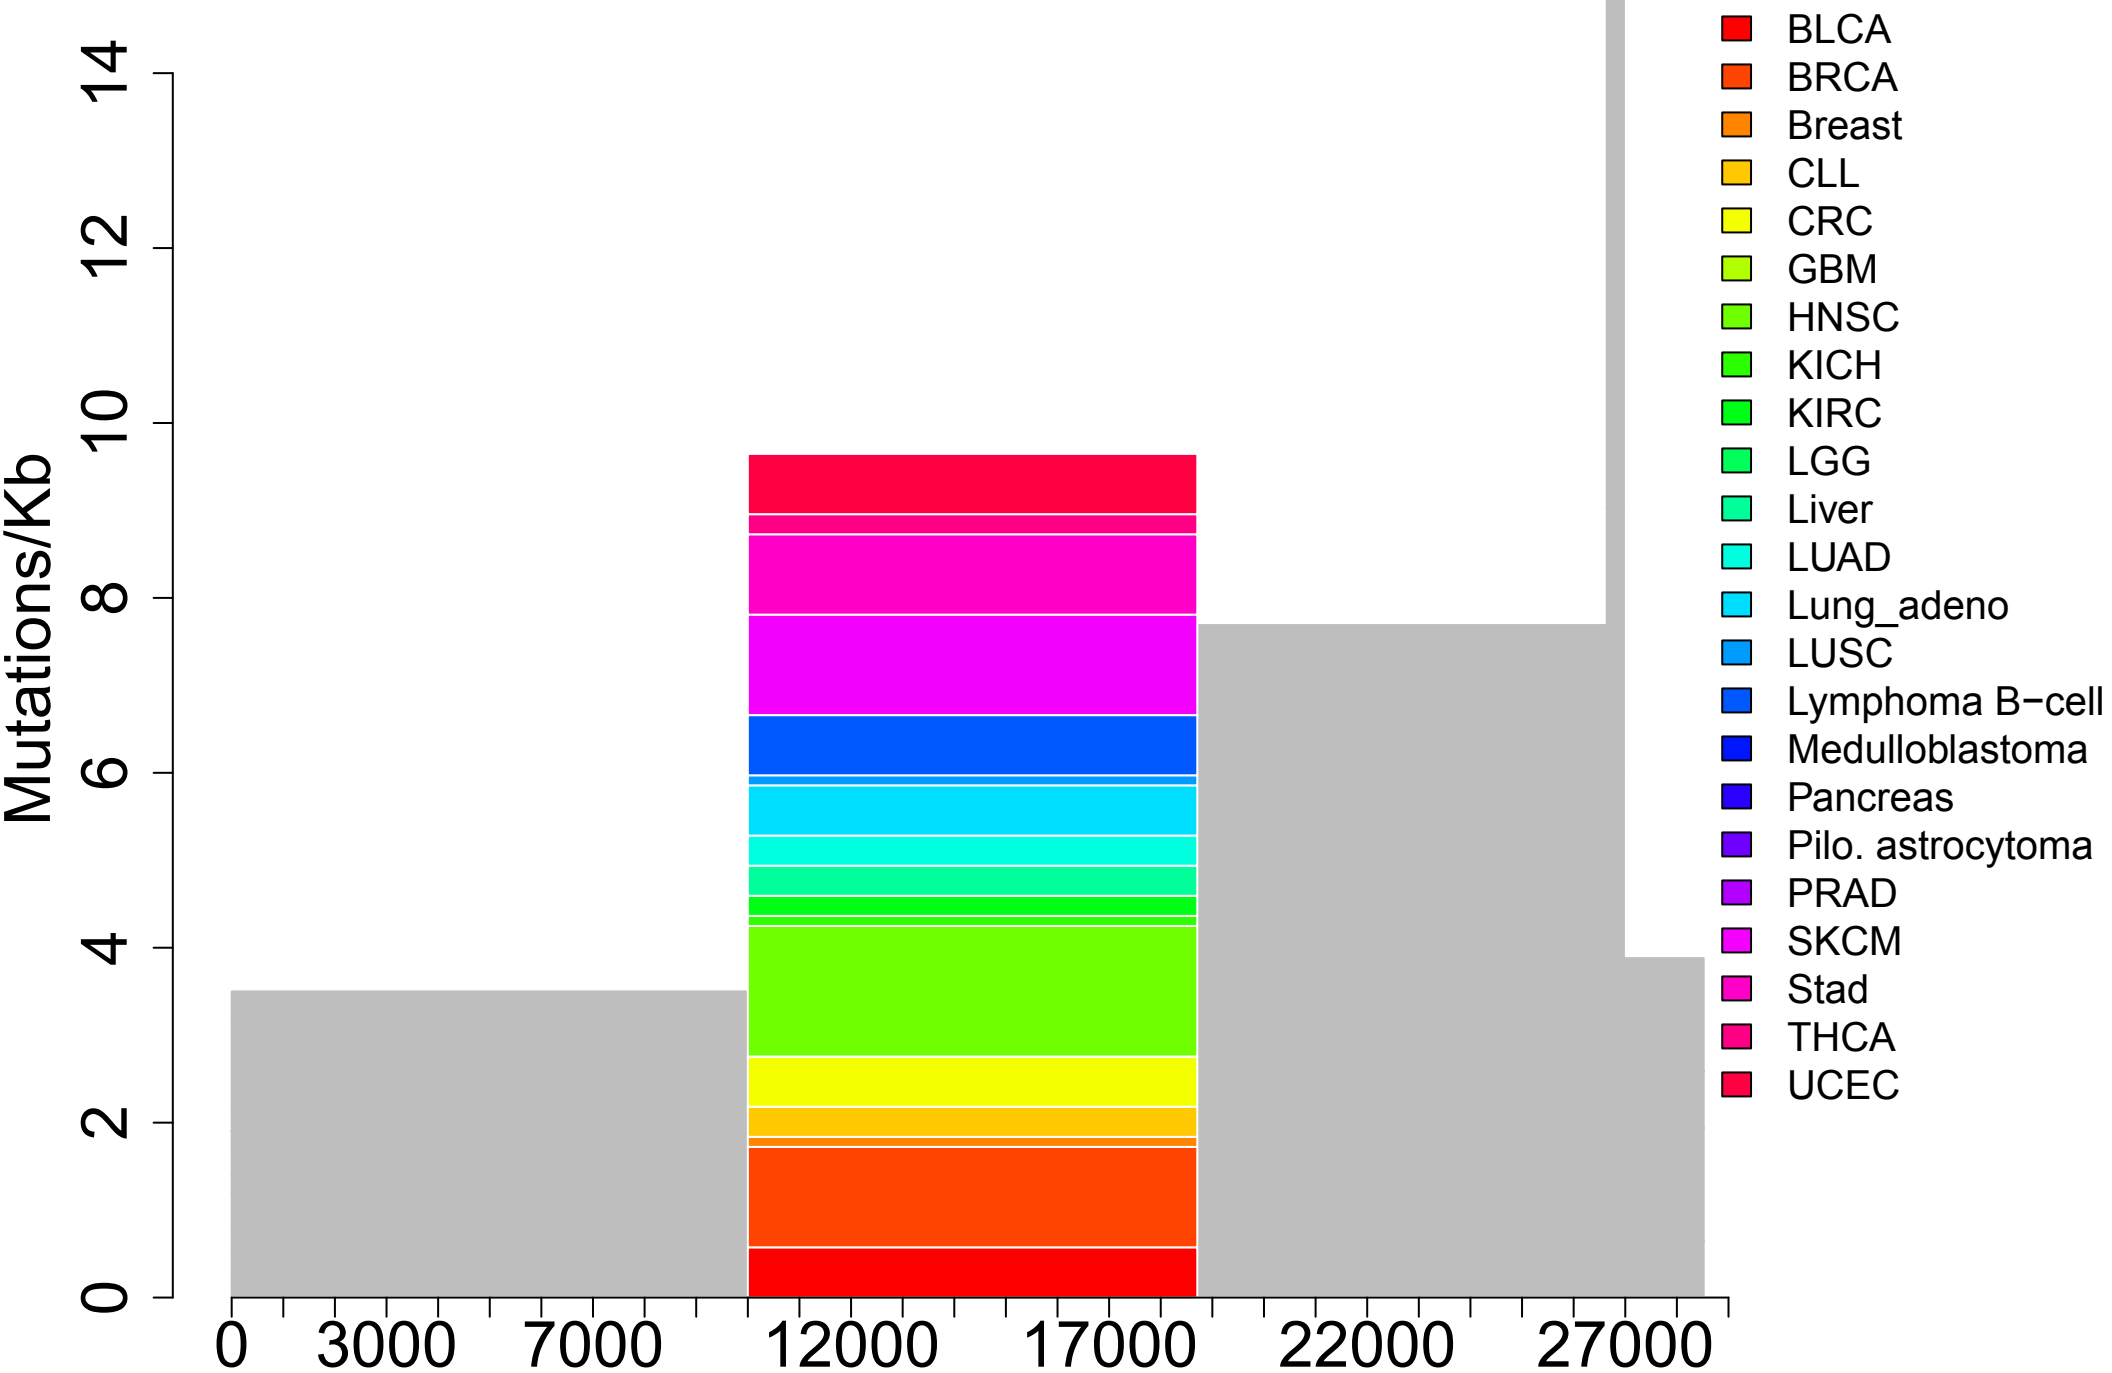

# Supplementary Figure S8

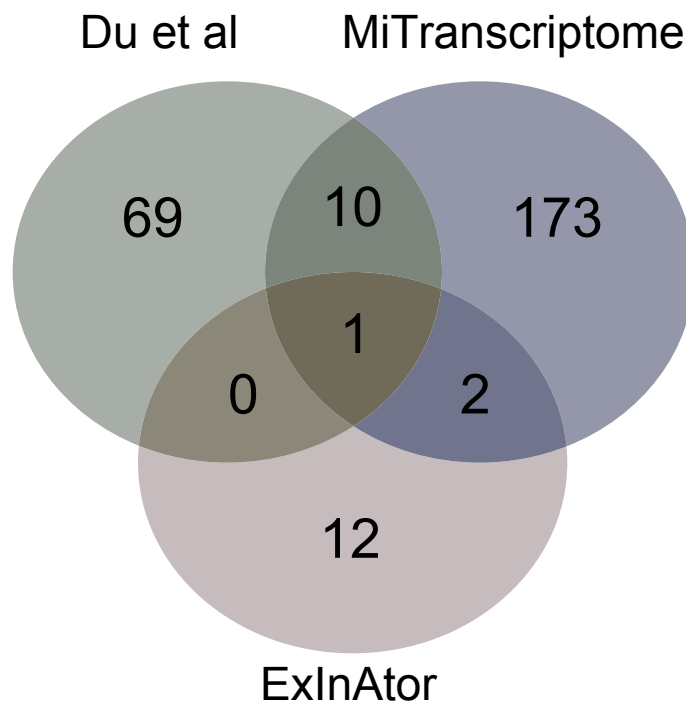

# Supplementary Figure S9

A

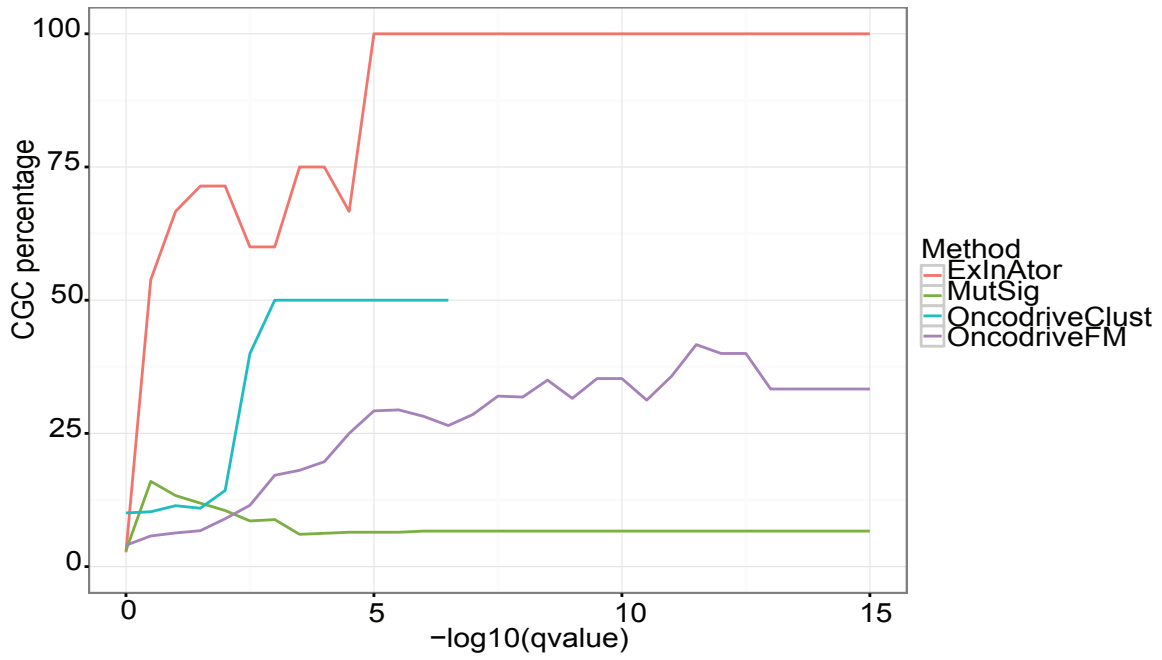

B

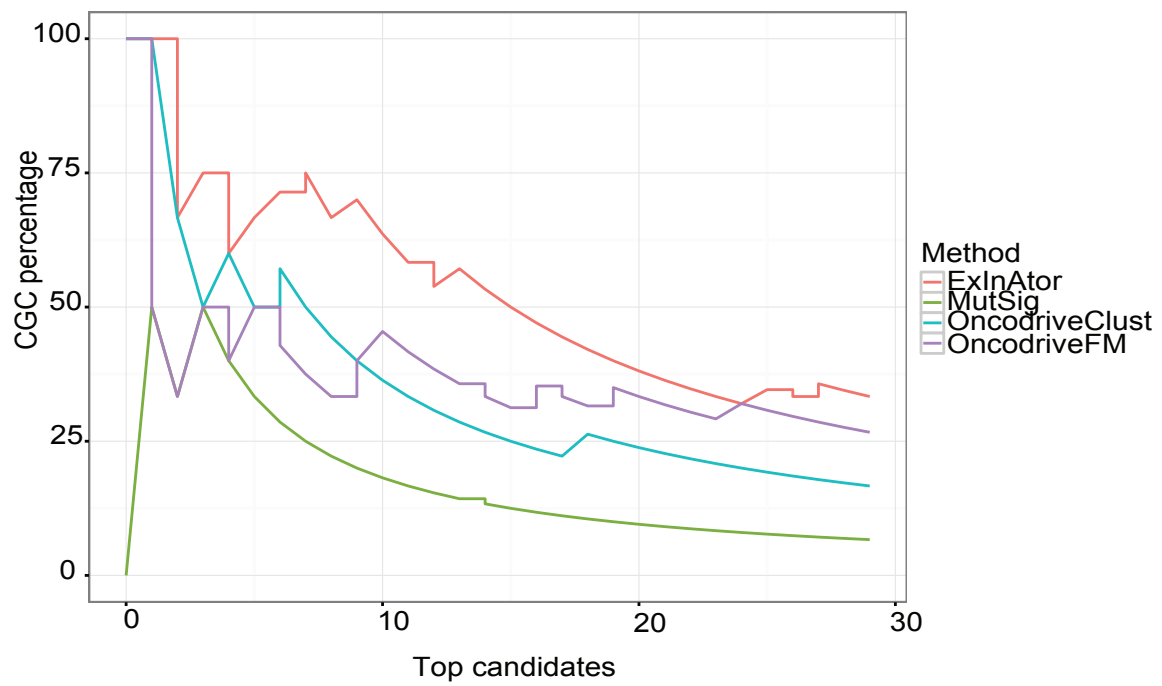

# Supplementary Figure S10

## A

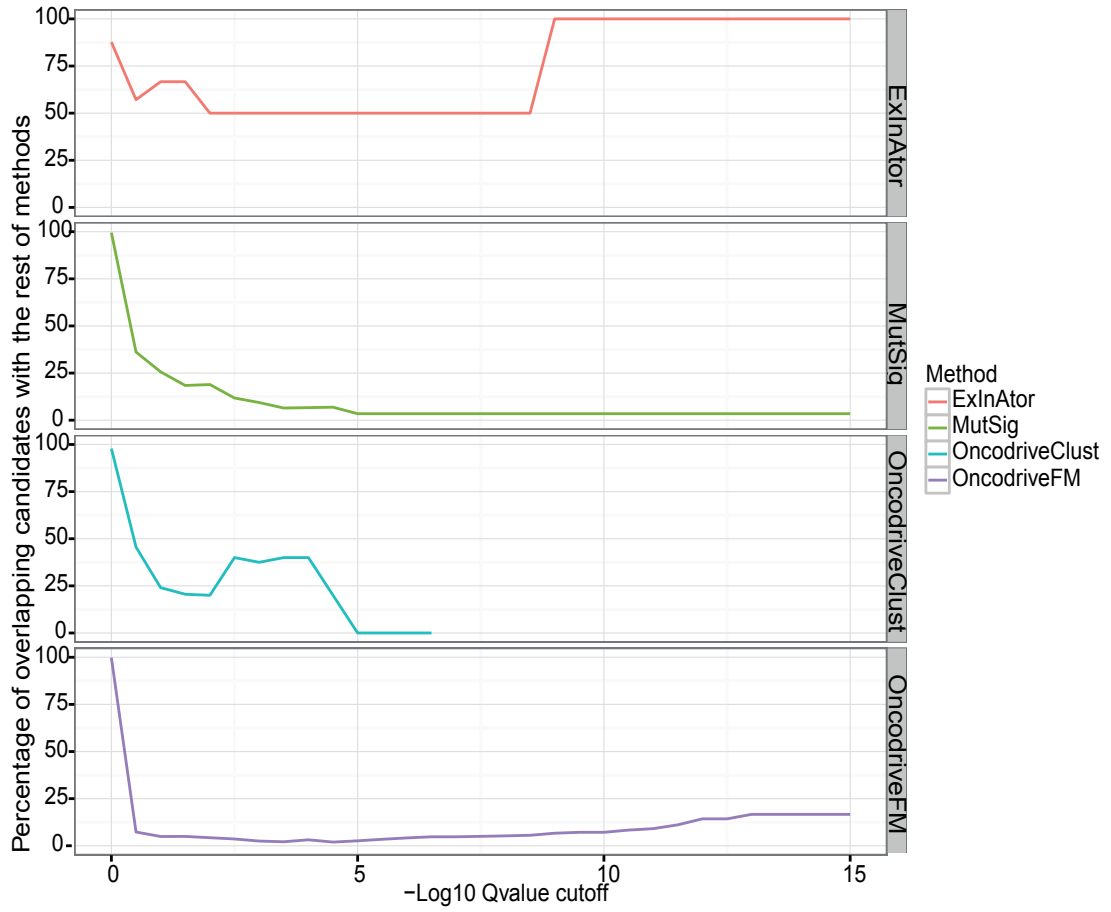

## B

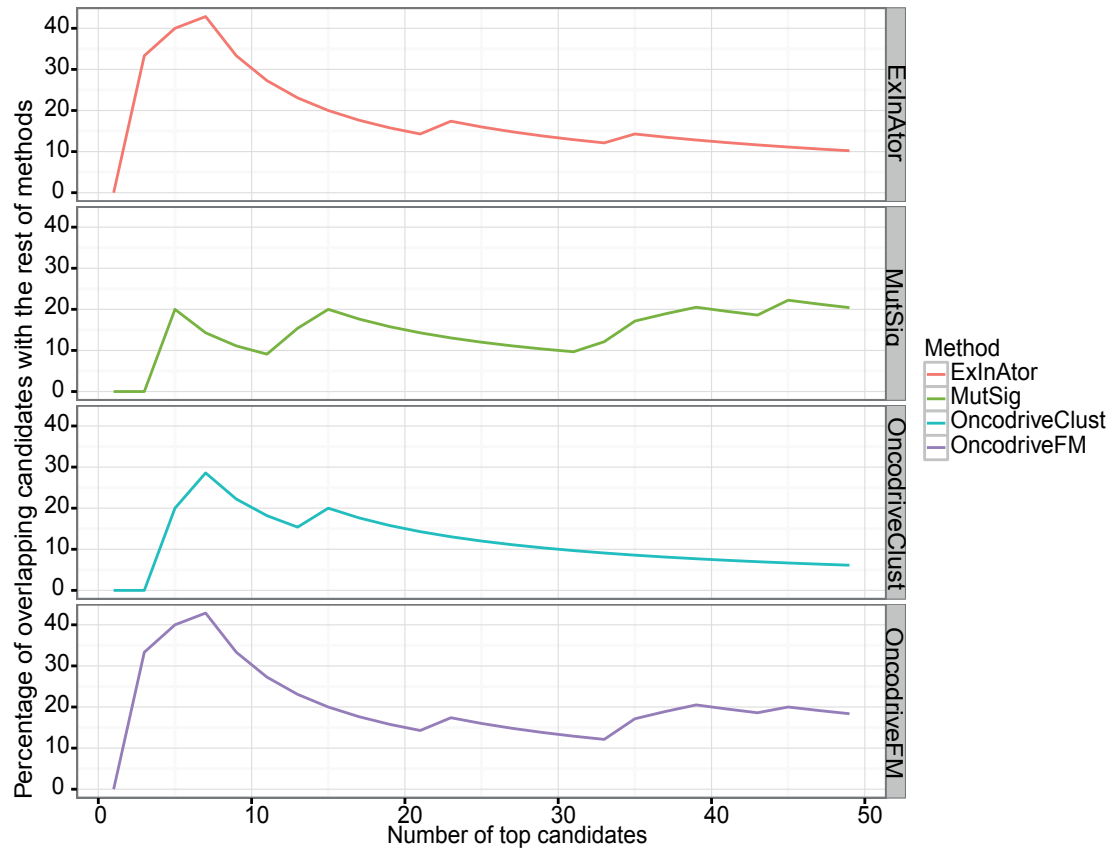

# MutSig Breast - 34659 genes

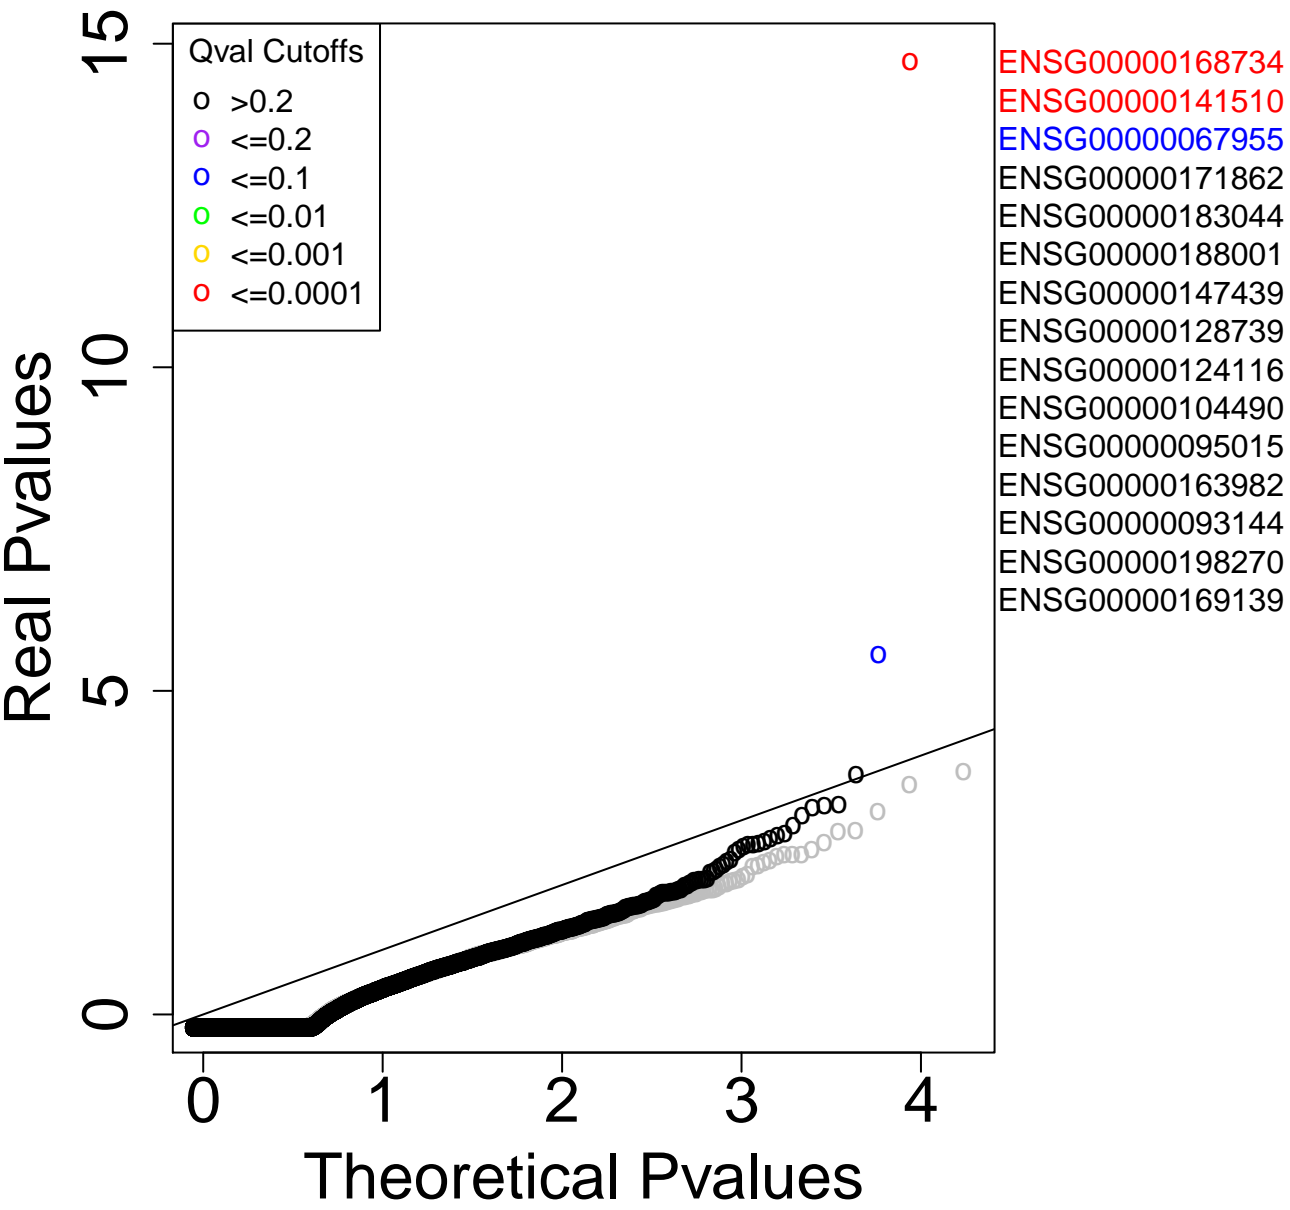



# MutSig CLL - 11375 genes

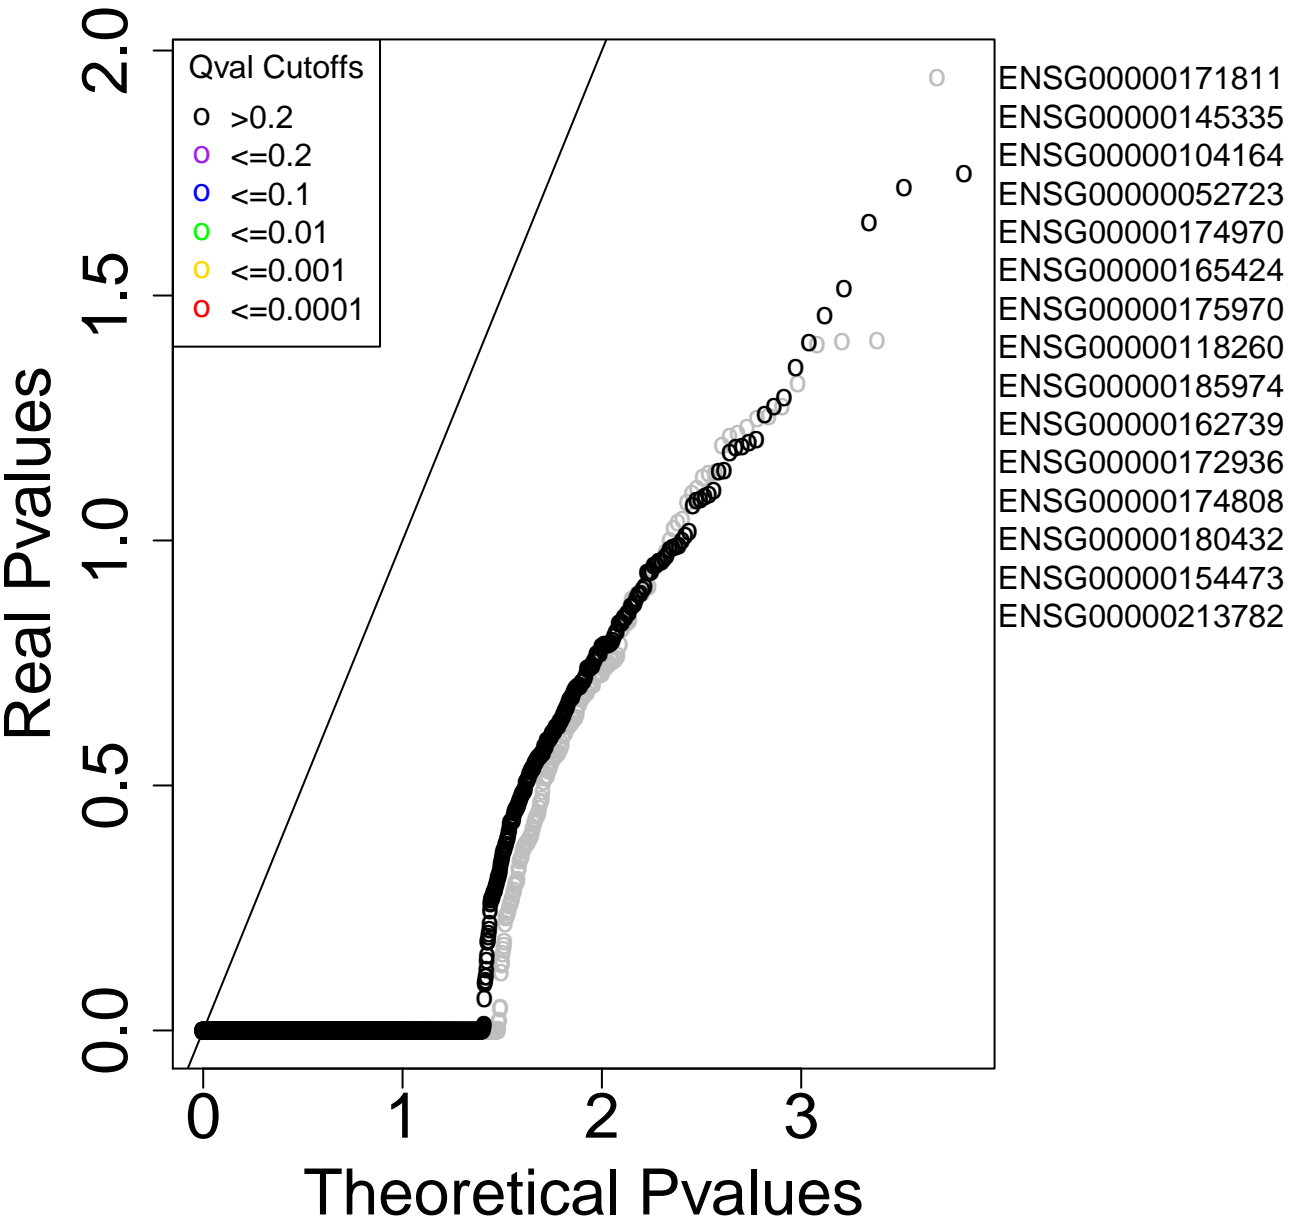

# MutSig Liver – 34248 genes

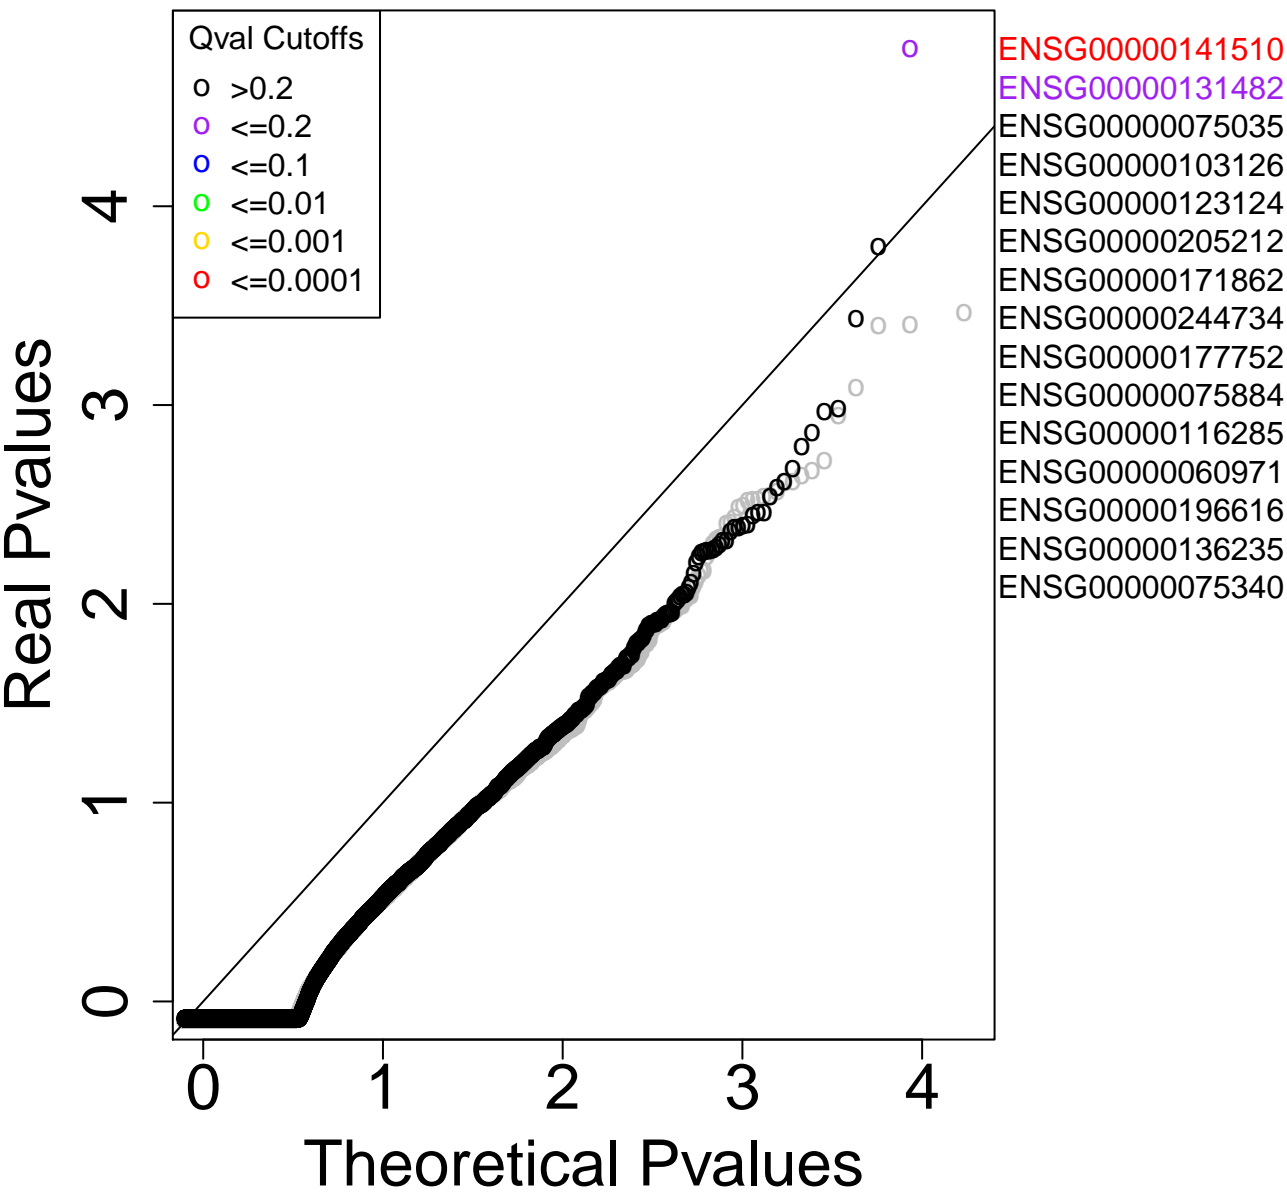

# MutSig Lung adeno- 35211 genes

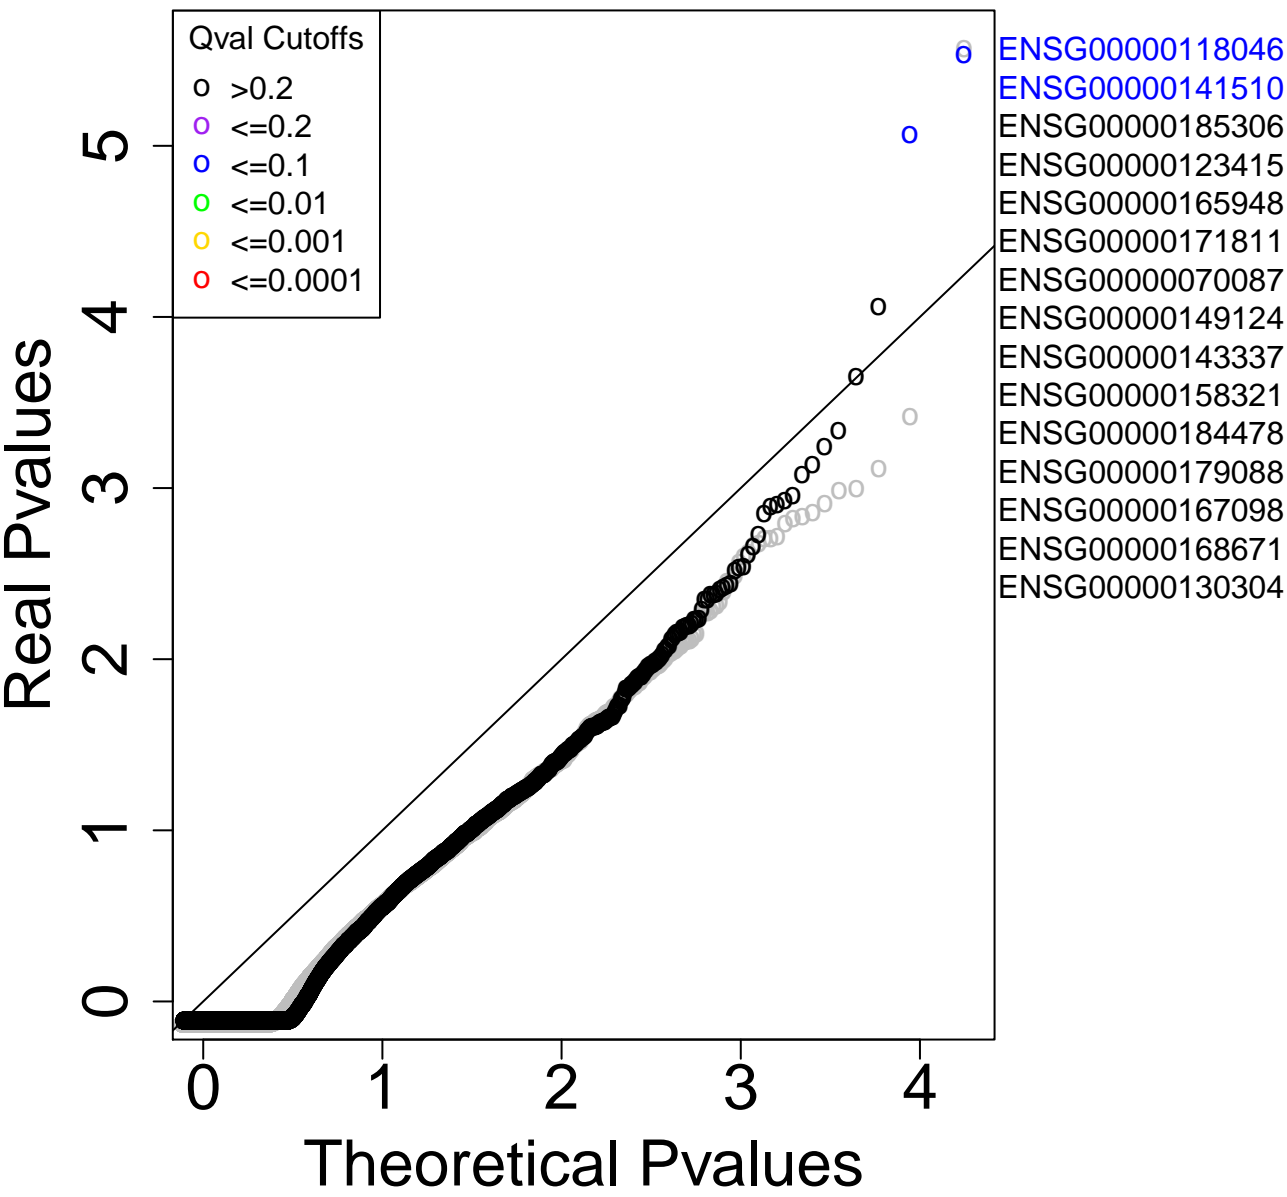

# MutSig Lymphoma B-cell – 21158 genes

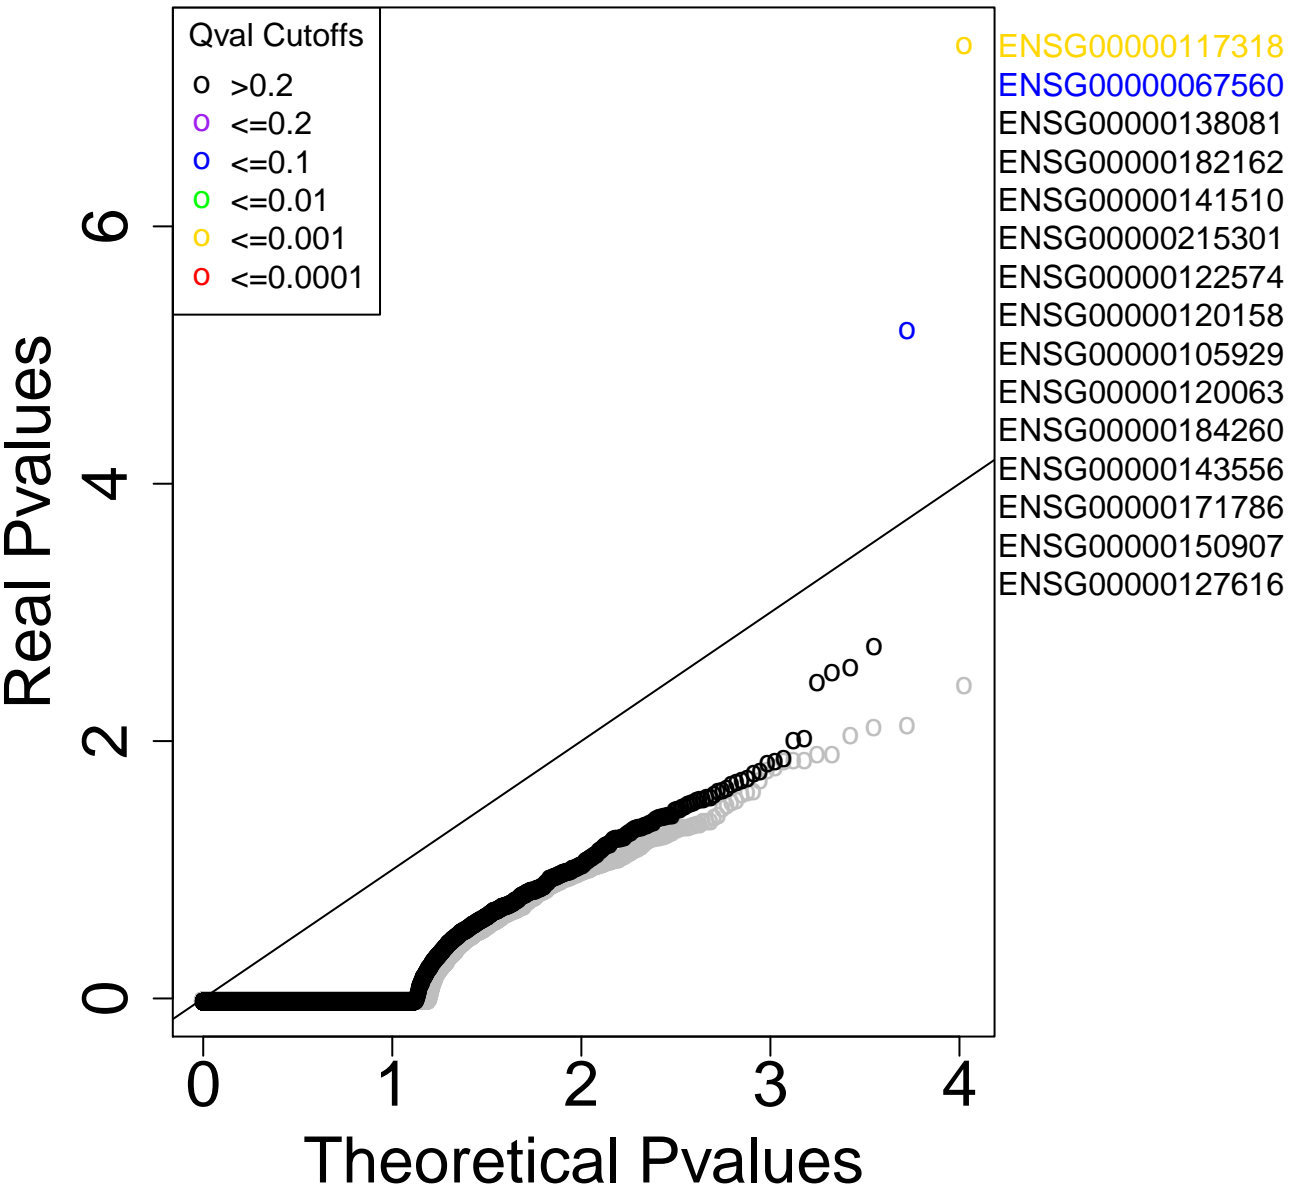

# MutSig Medulloblastoma – 24518 genes

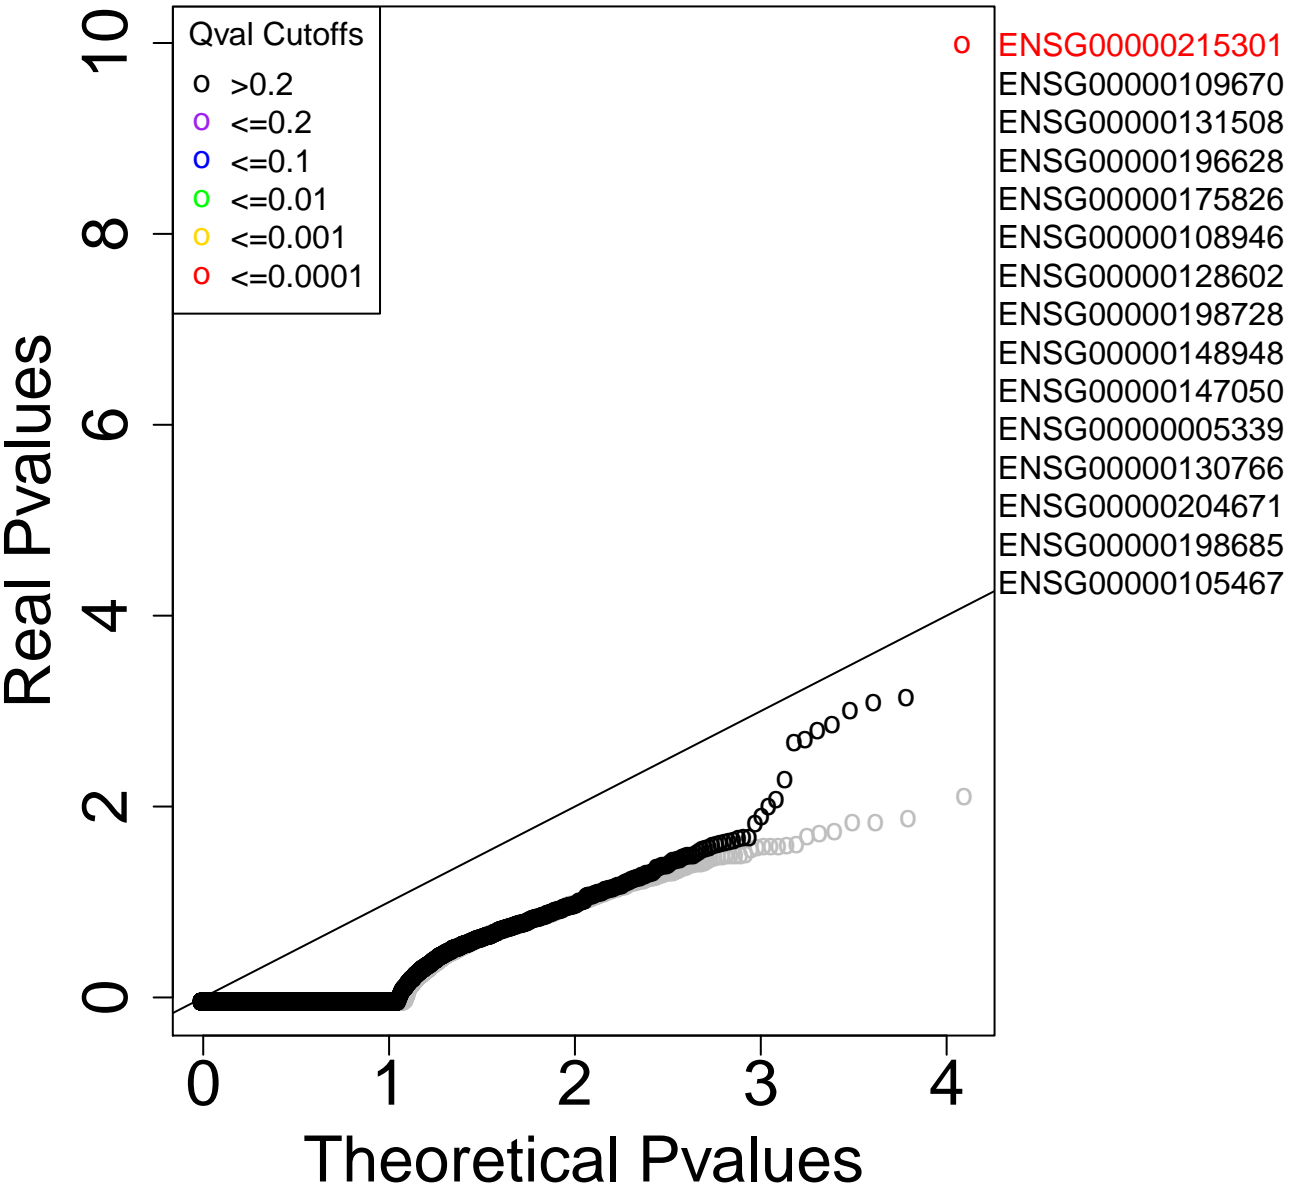

# MutSig Pancancer – 35544 genes

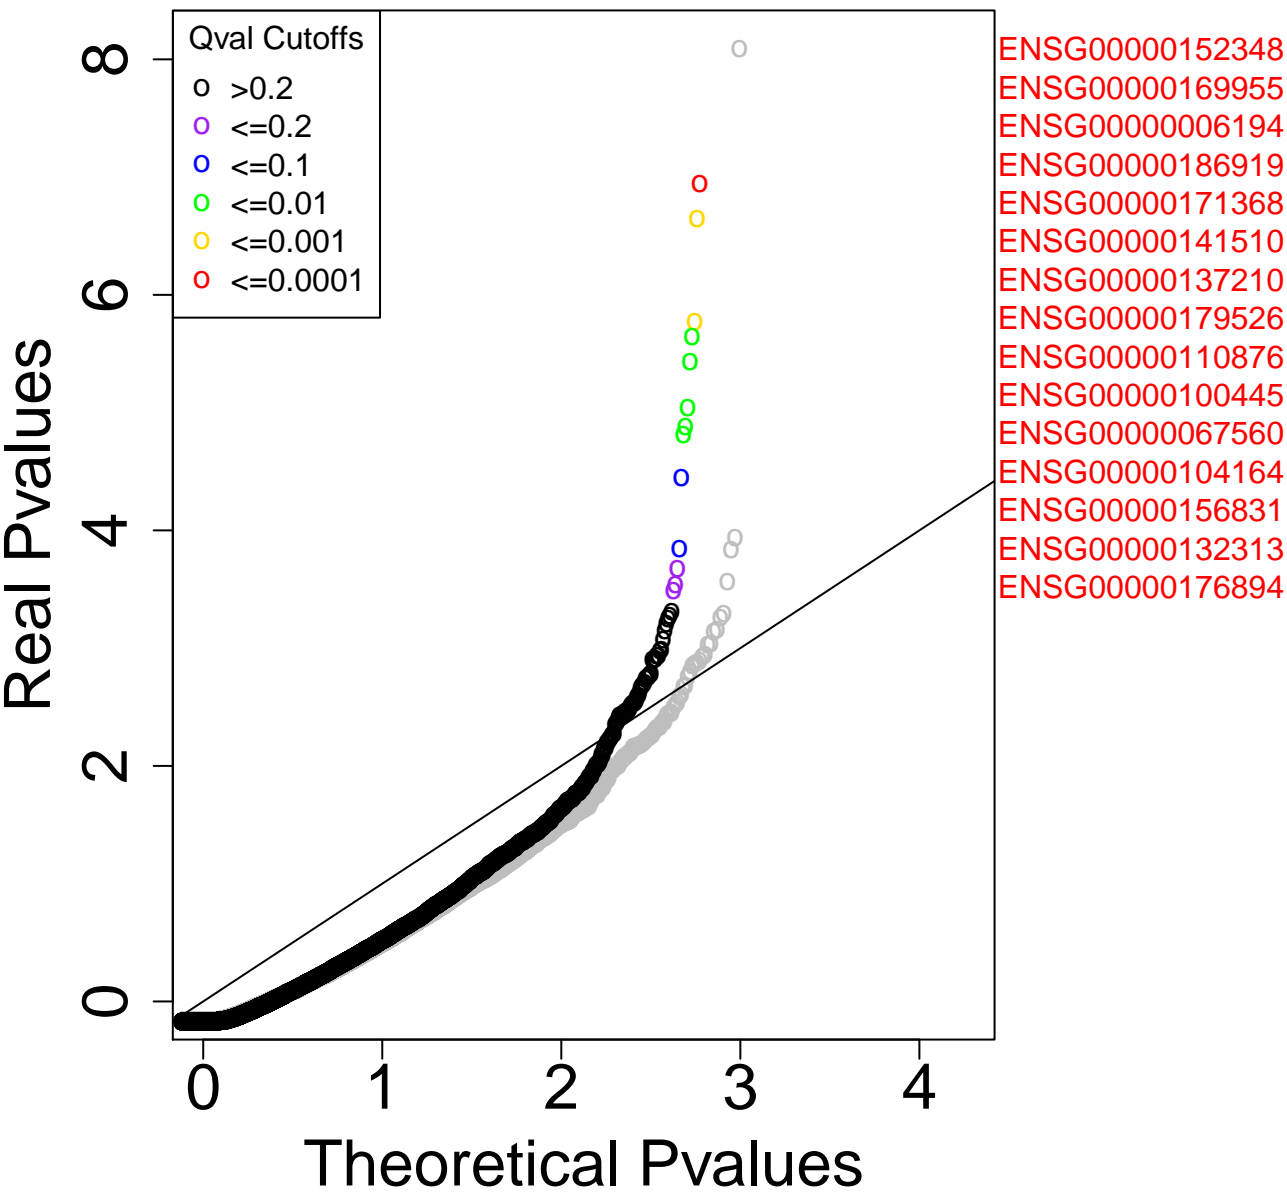

# MutSig Pancreas – 22319 genes

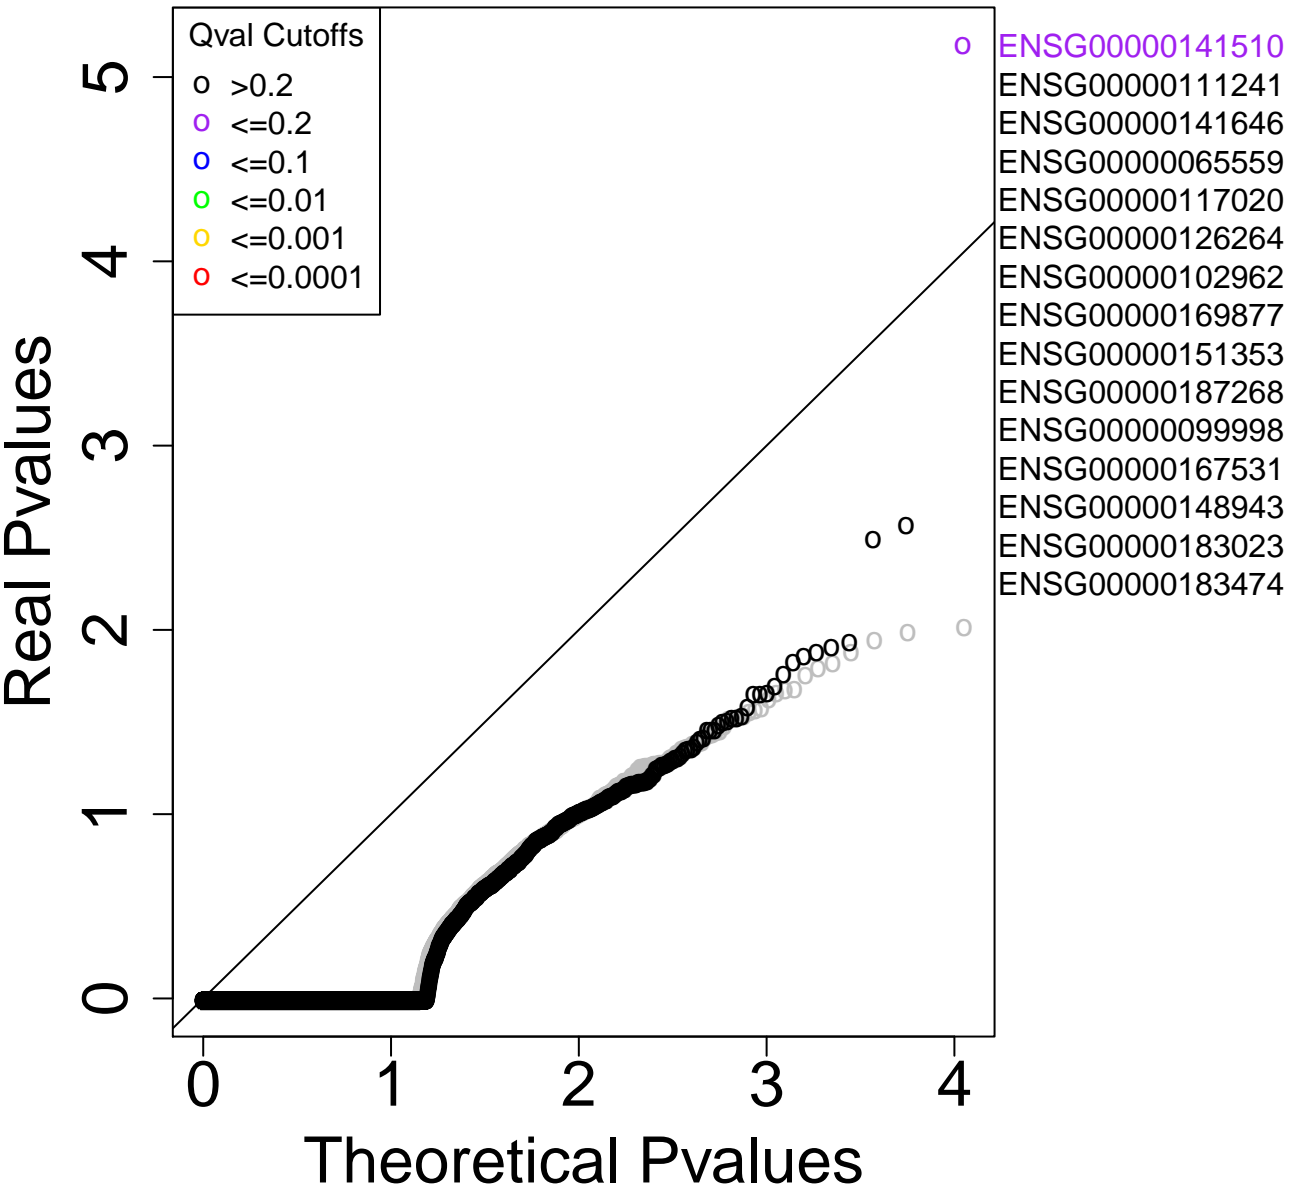

# MutSig Stad – 35513 genes

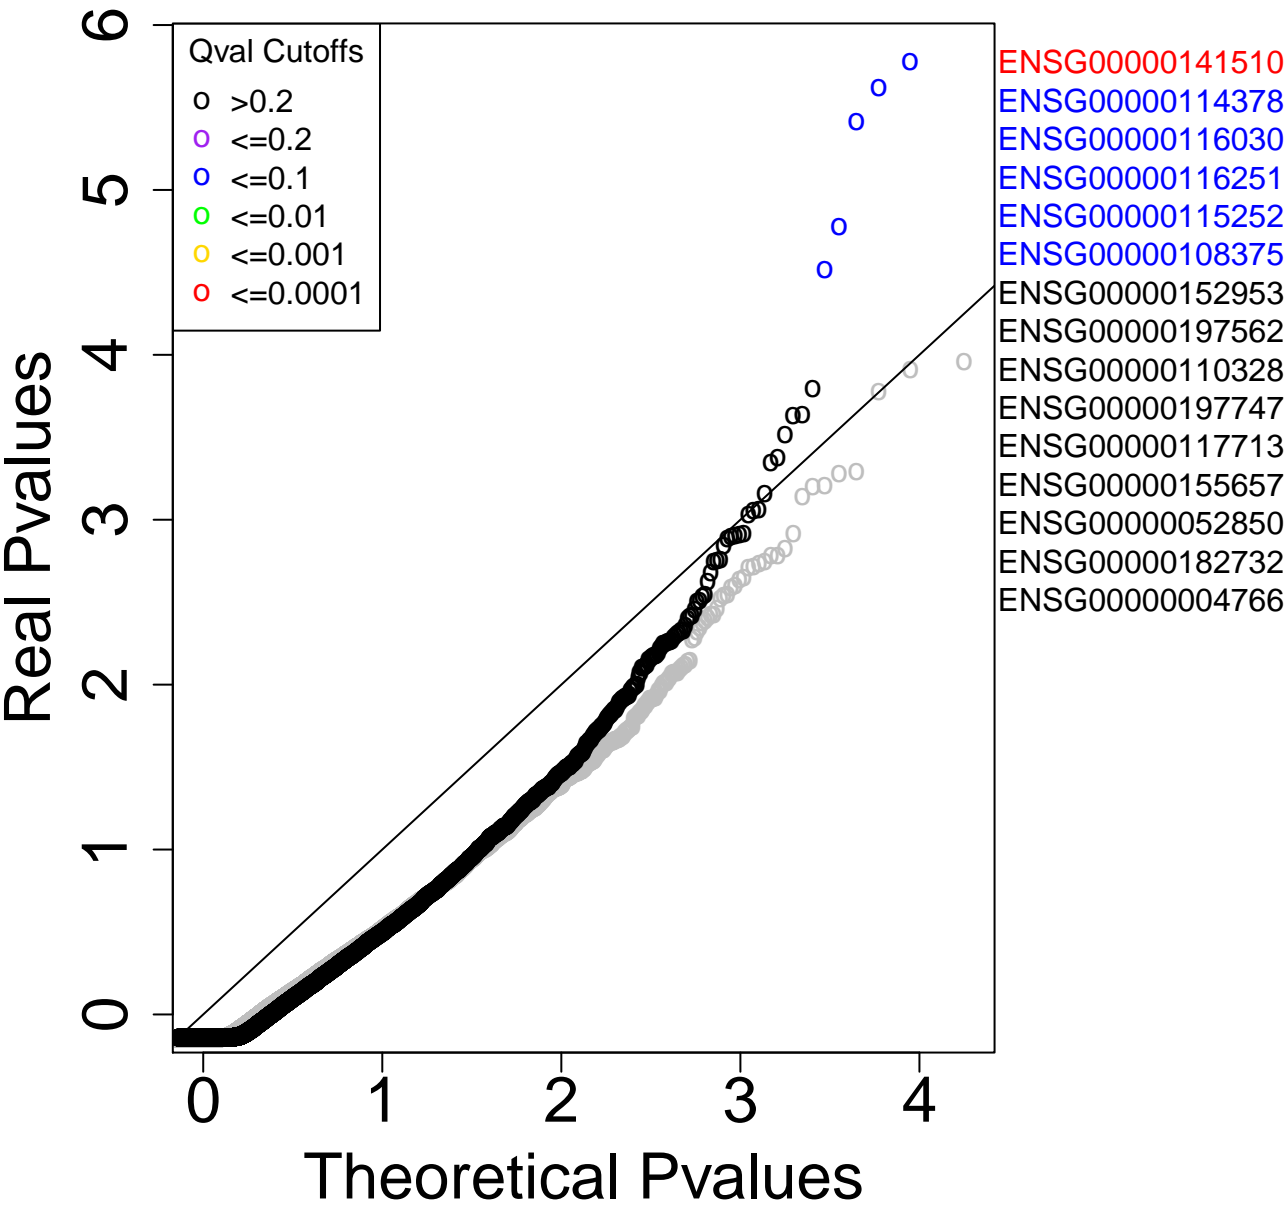



# OncodriveClust Breast – 47 genes

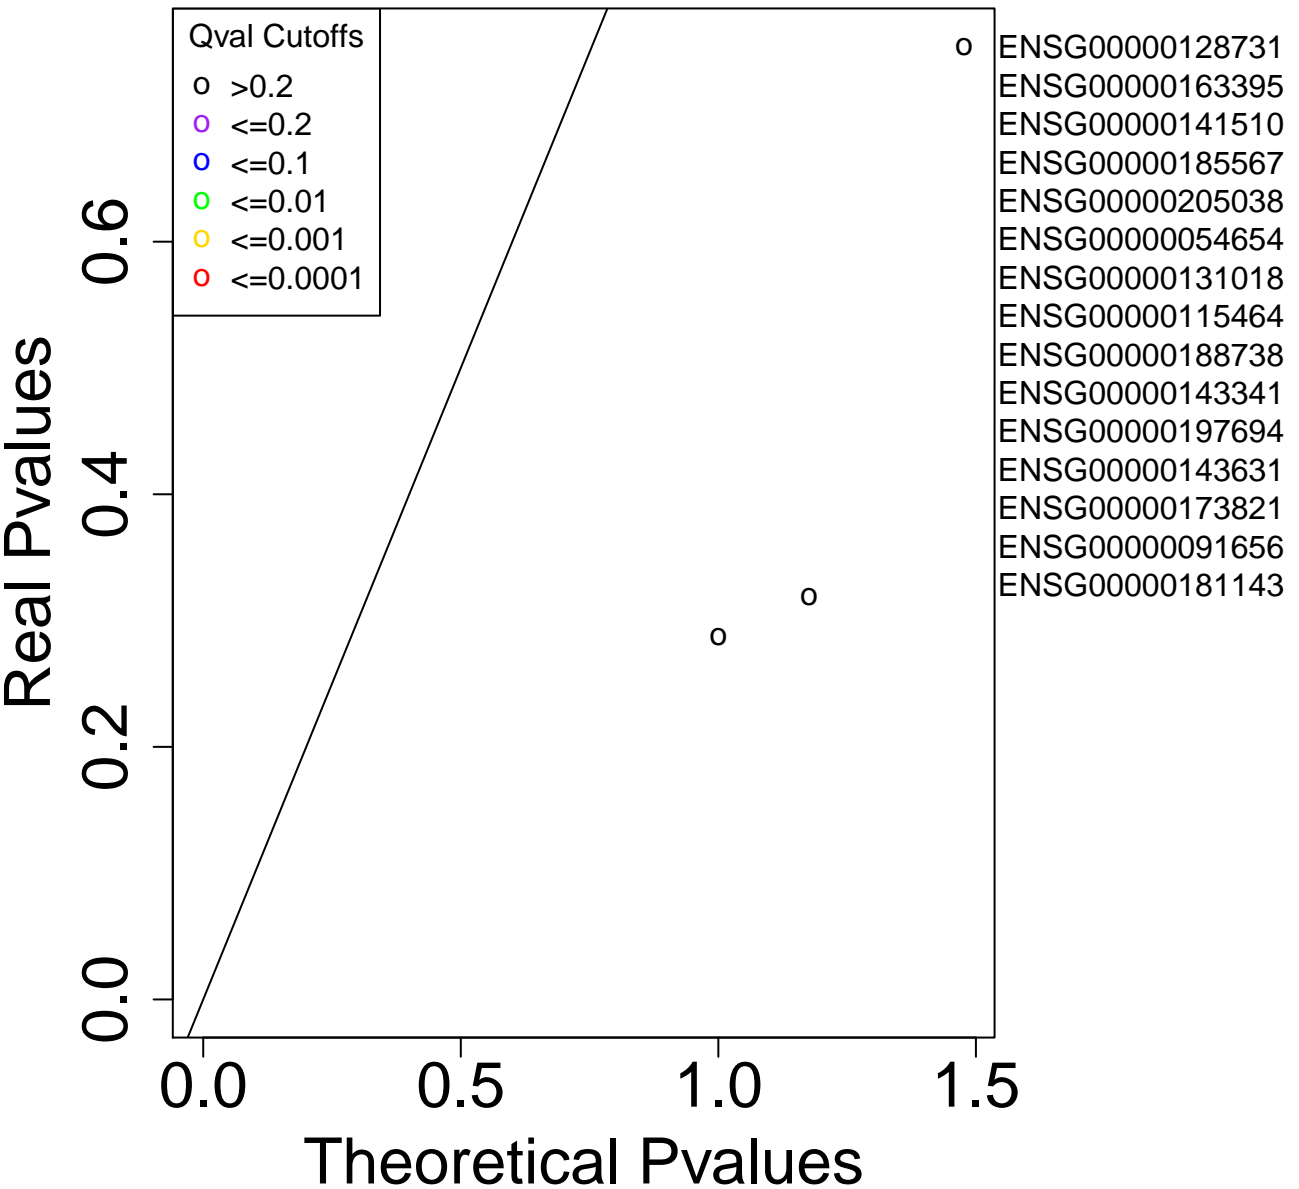

# OncodriveClust Liver – 66 genes

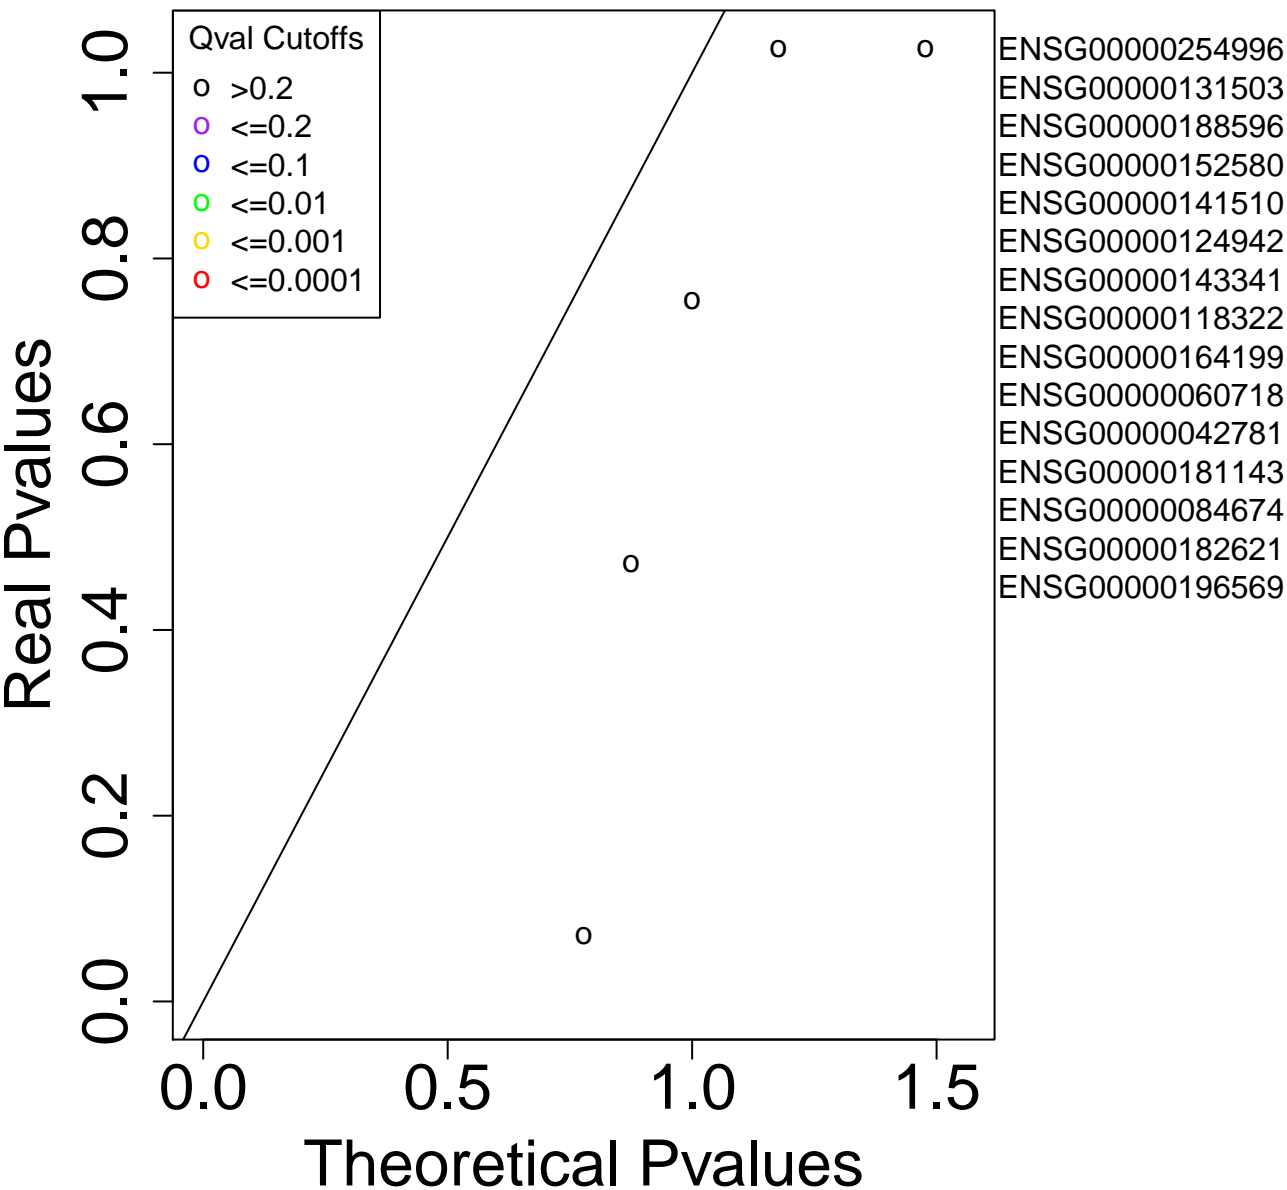

# OncodriveClust Lung adeno – 213 genes

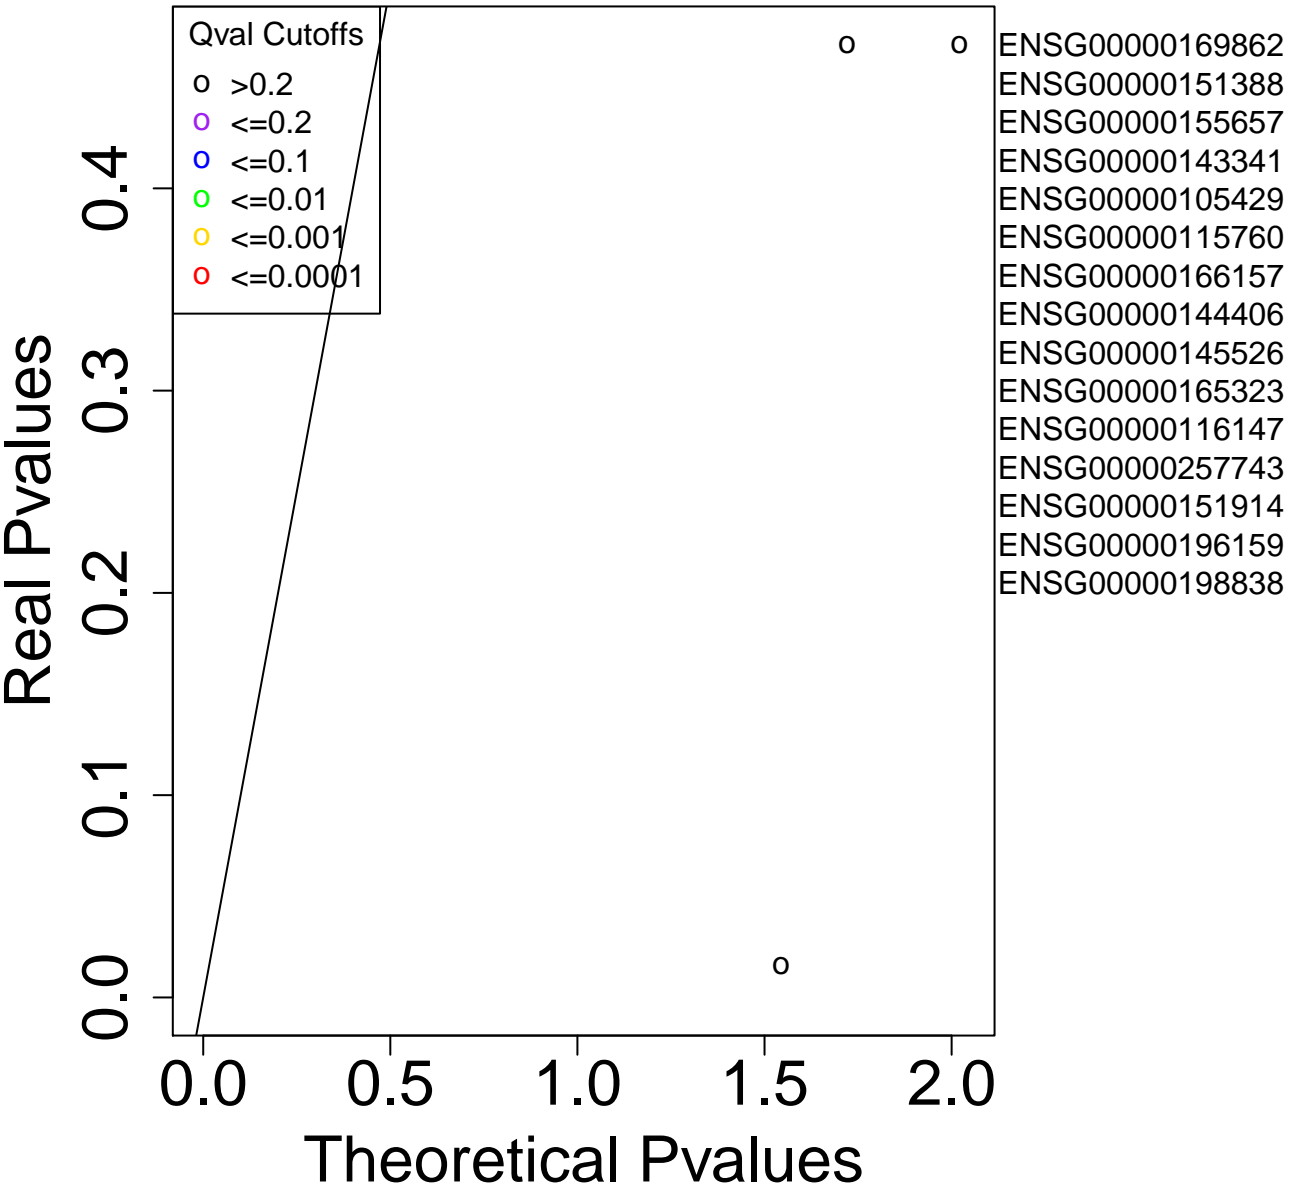

# OncodriveClust Lymphoma B-cell – 11 genes

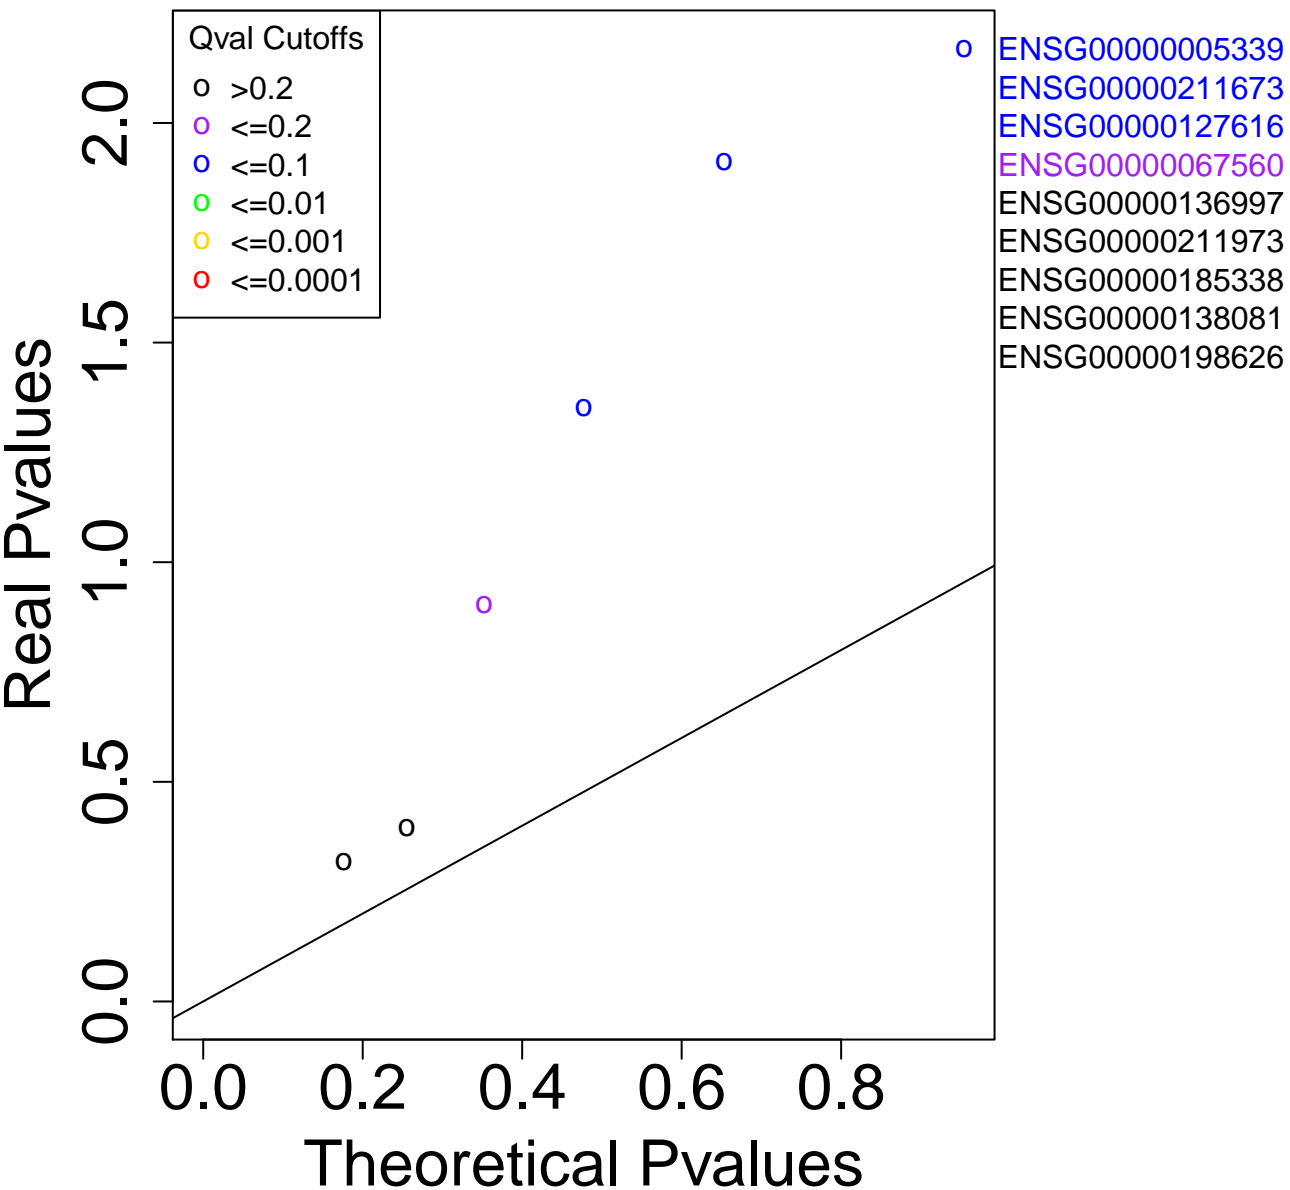

# OncodriveClust Medulloblastoma – 7 genes

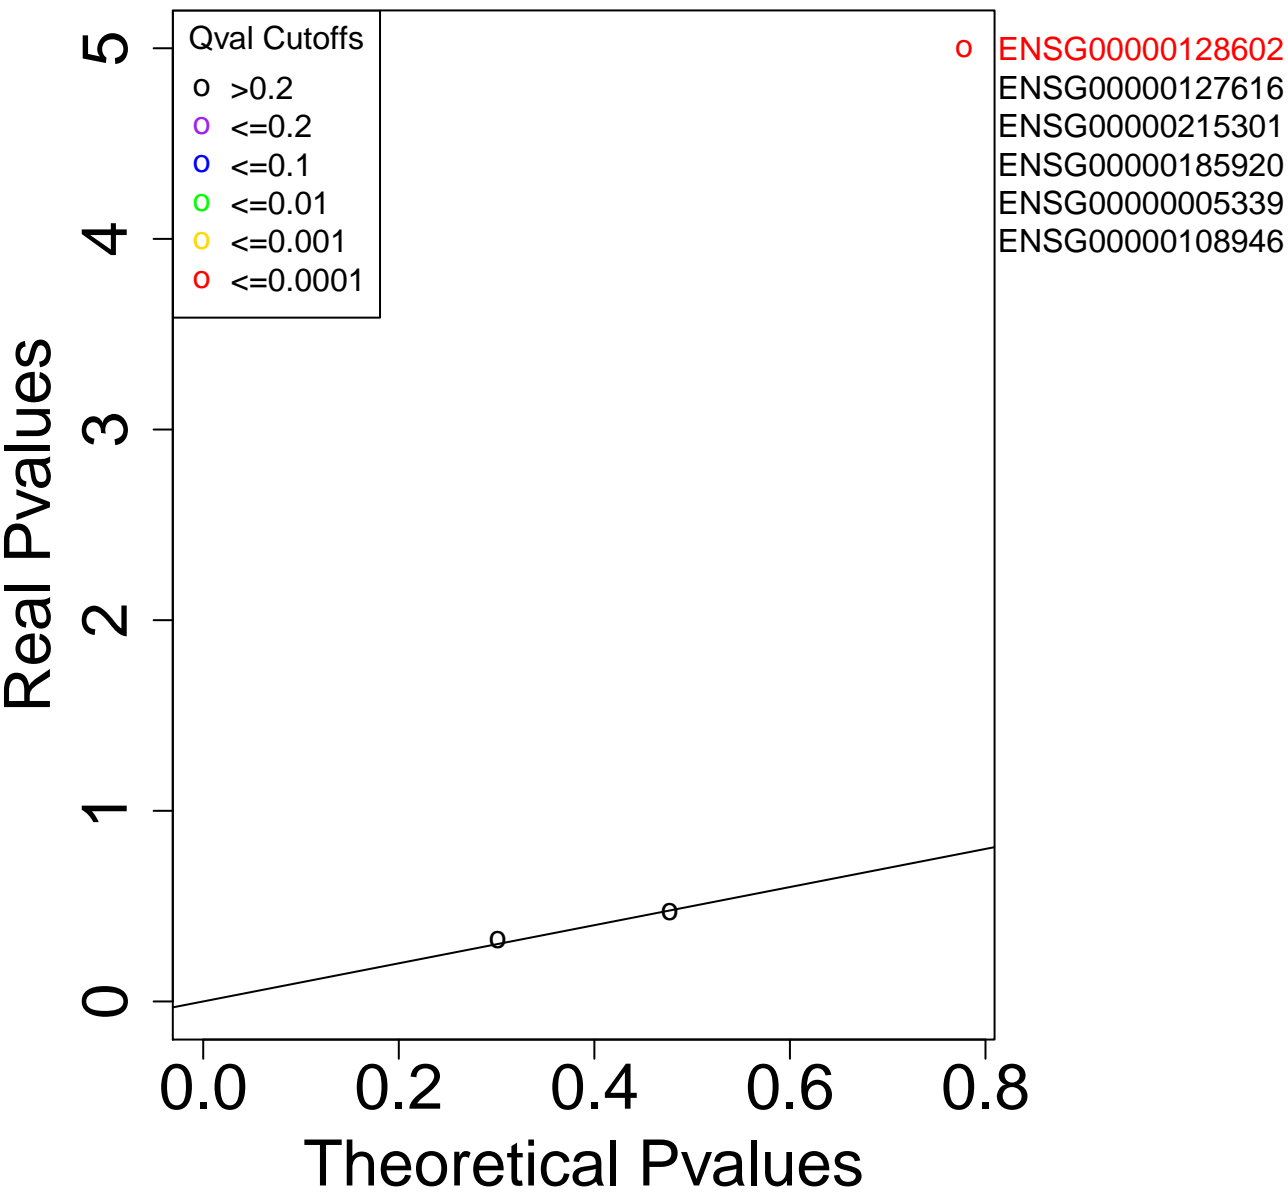

# OncodriveClust Pancancer – 3464 genes

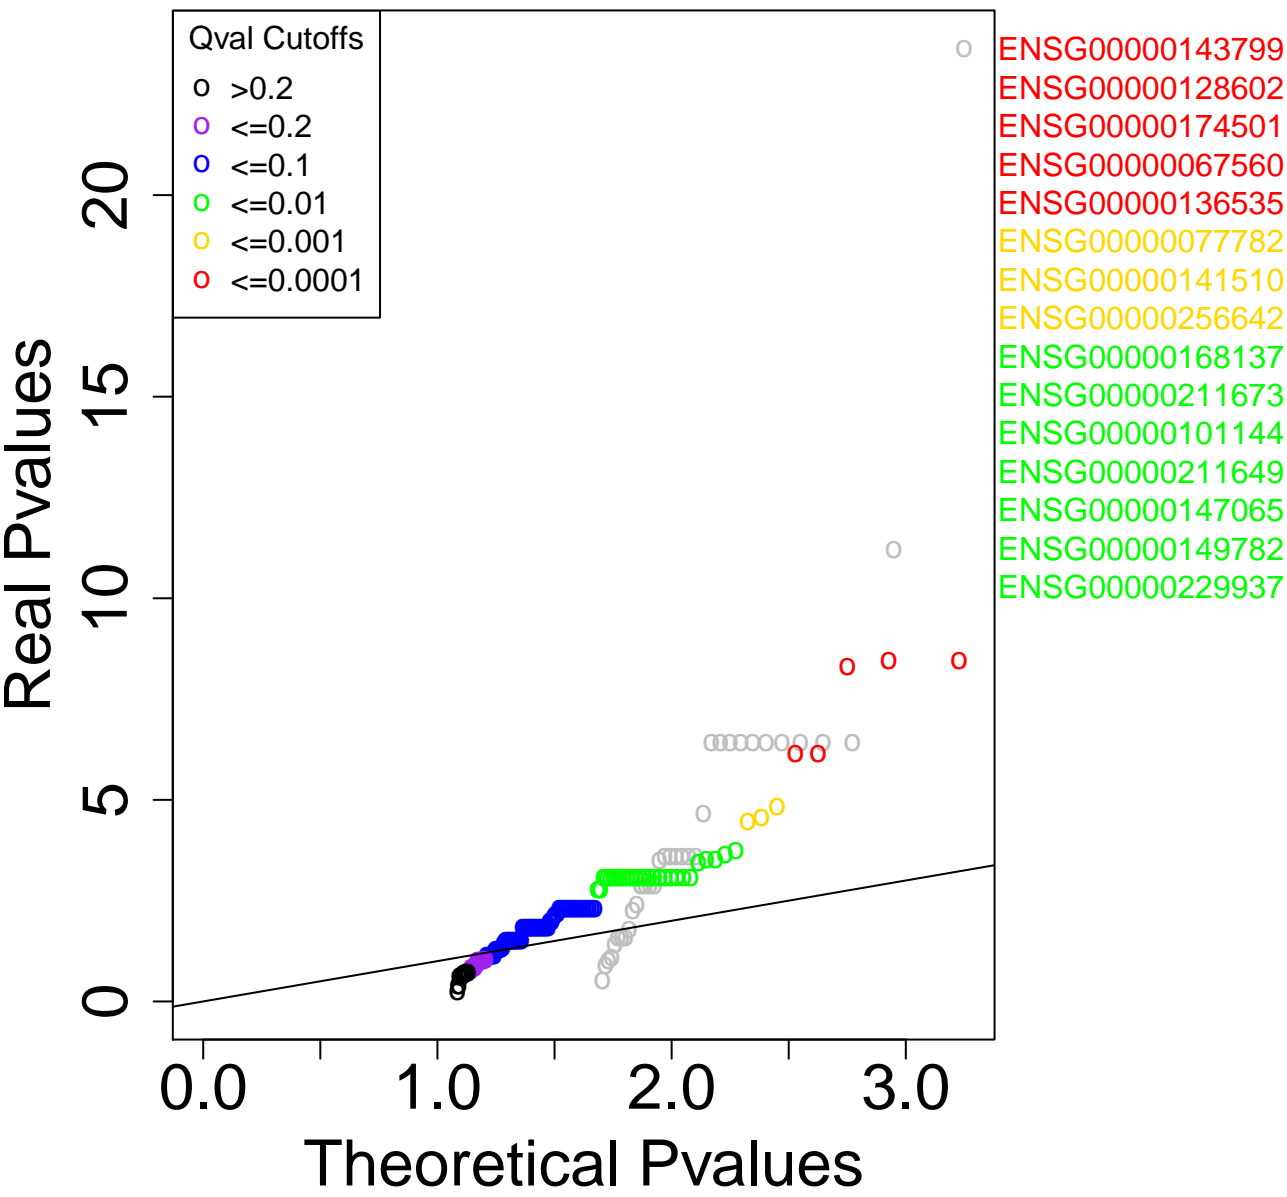

# OncodriveClust Stad – 616 genes

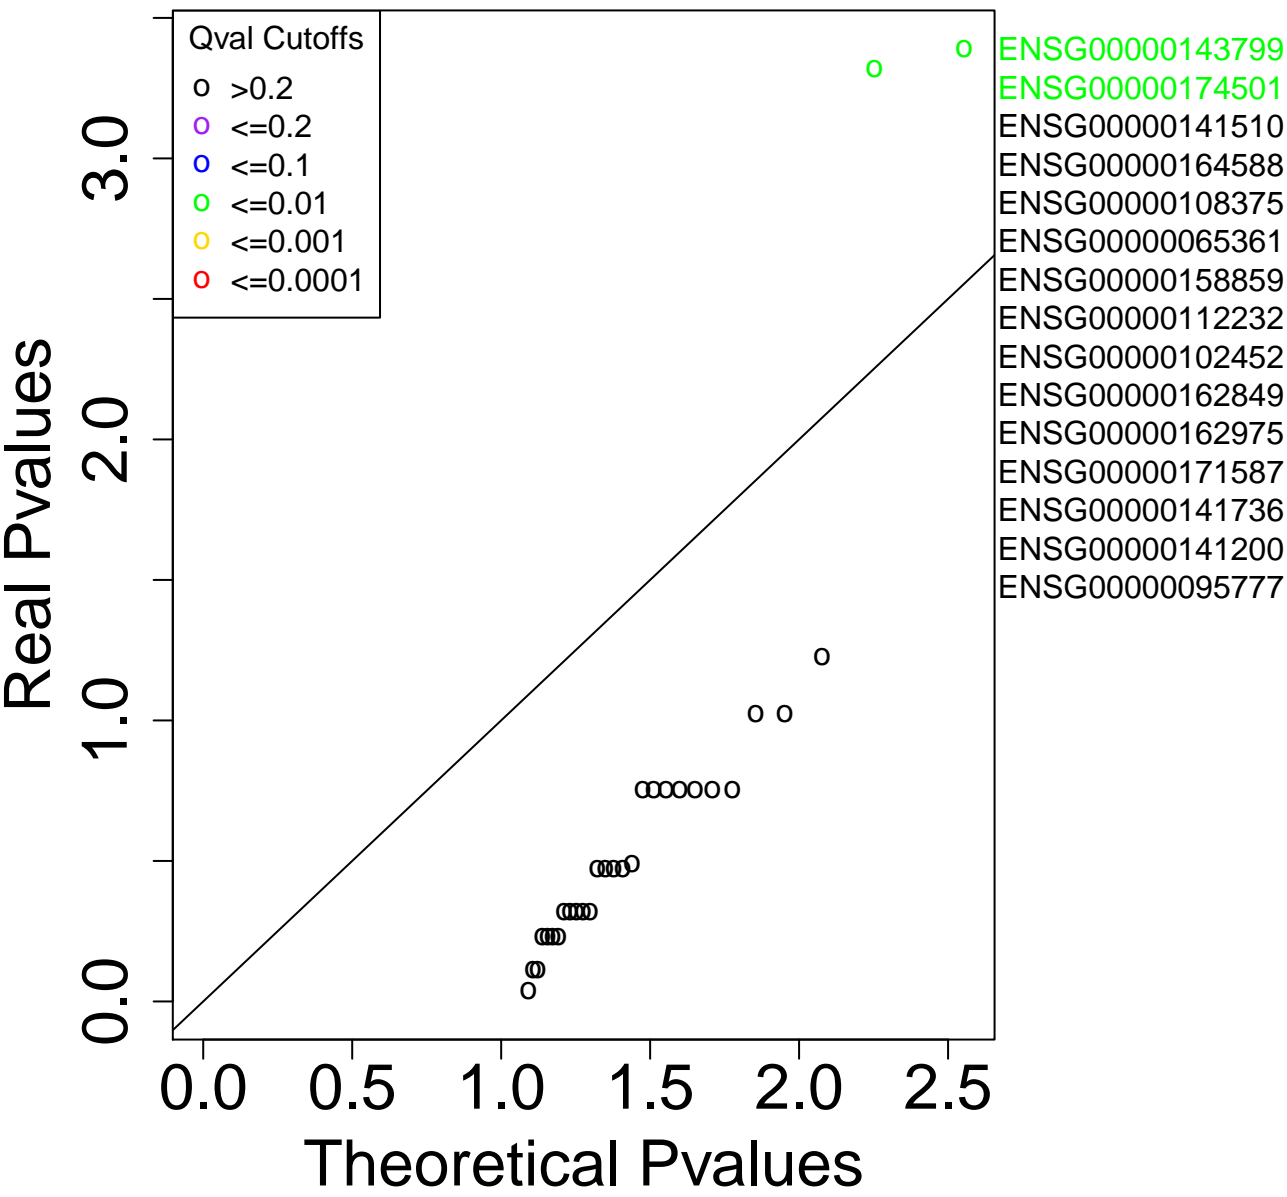

# OncodriveFM Breast – 2201 genes

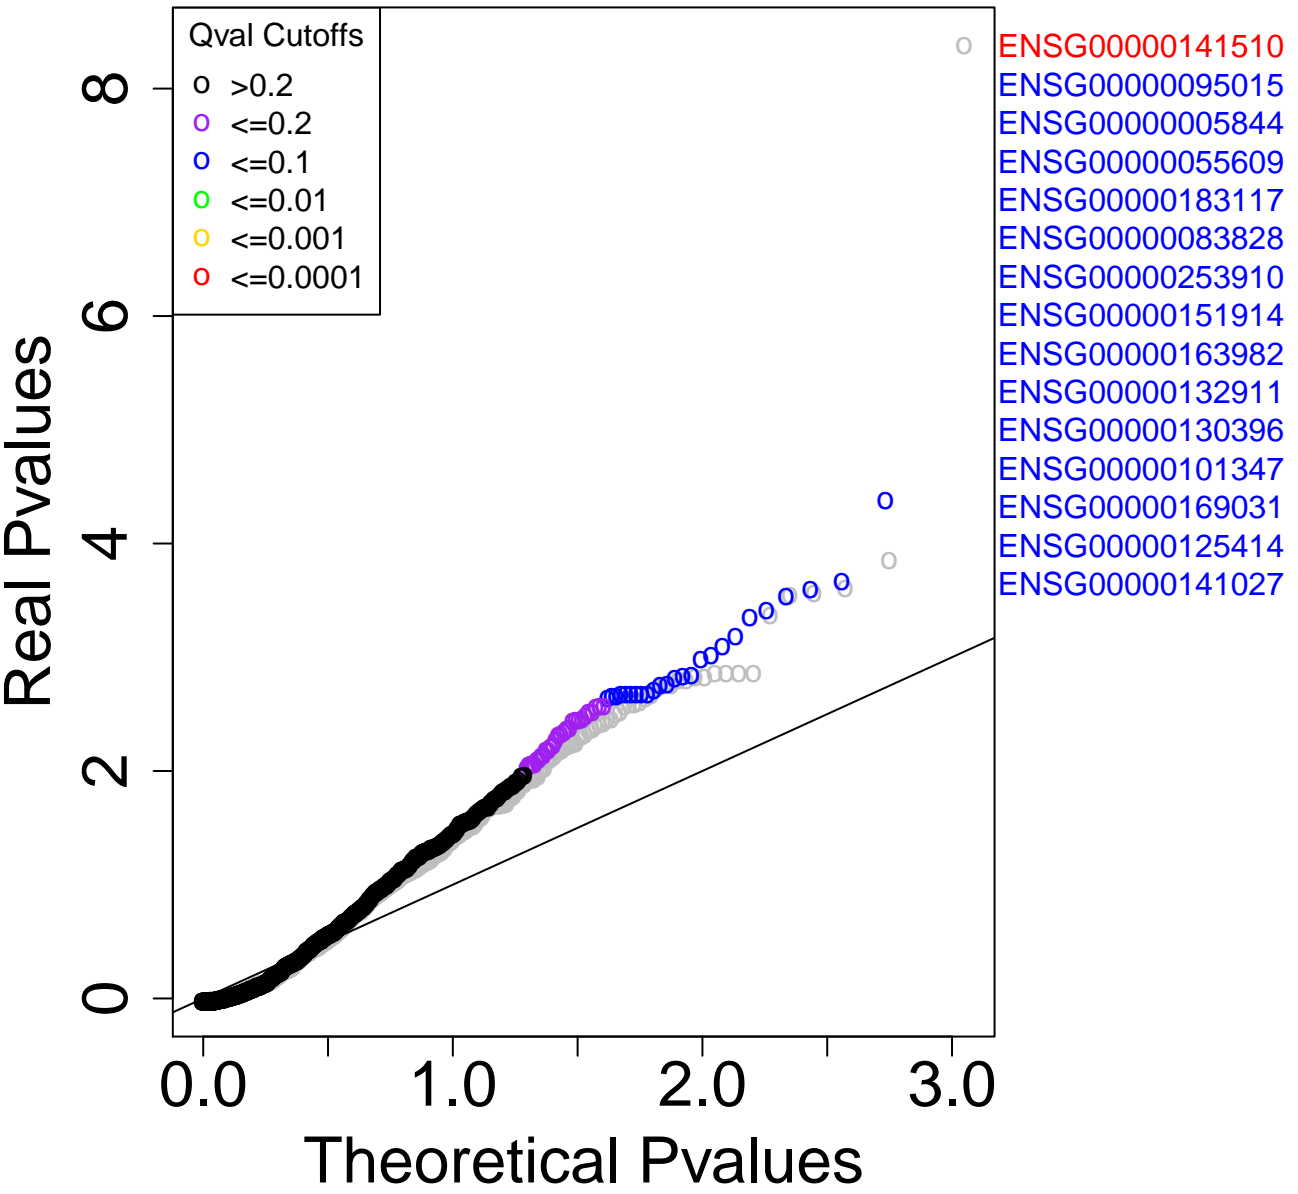



# OncodriveFM CLL – 20 genes

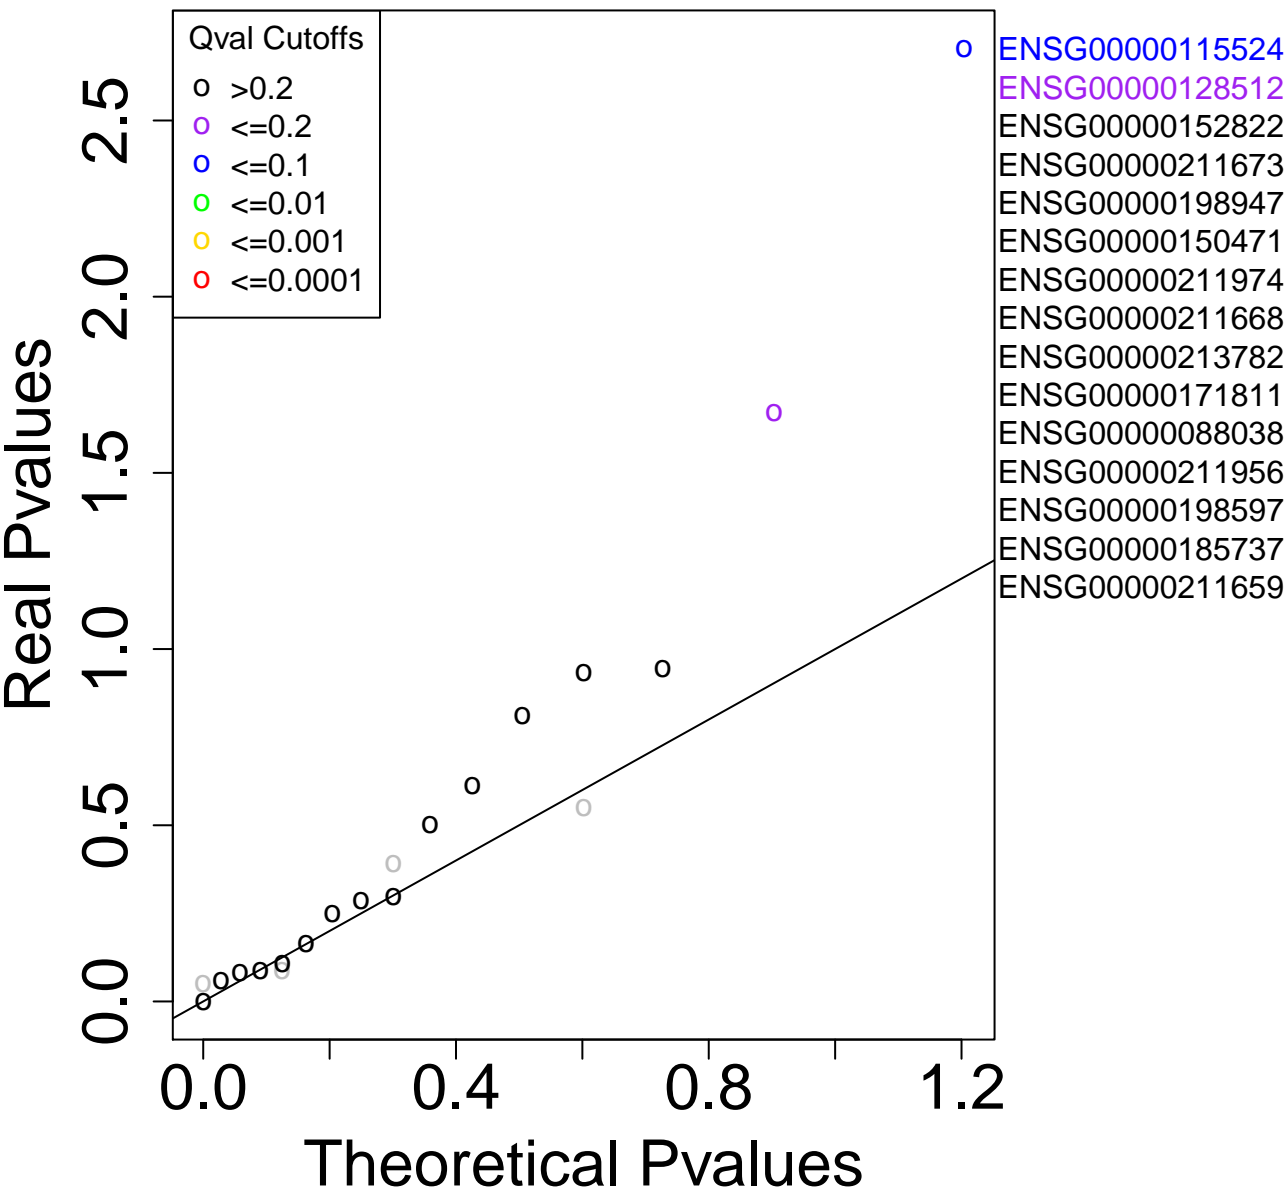

# OncodriveFM Liver – 2383 genes

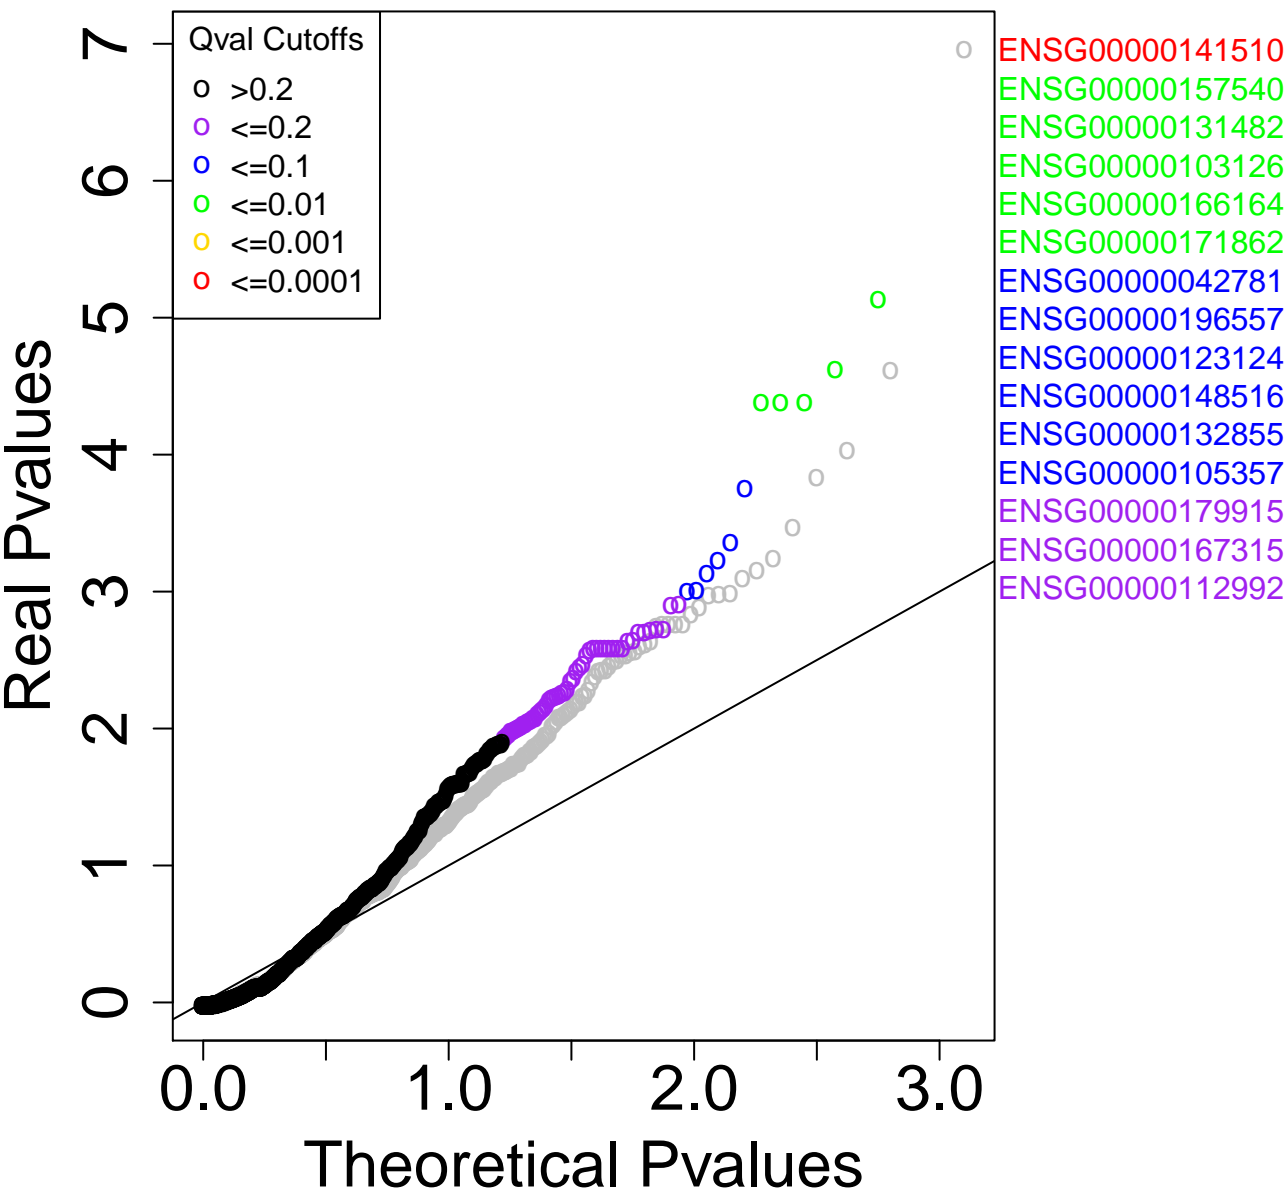

# OncodriveFM Lung adeno – 4319 genes

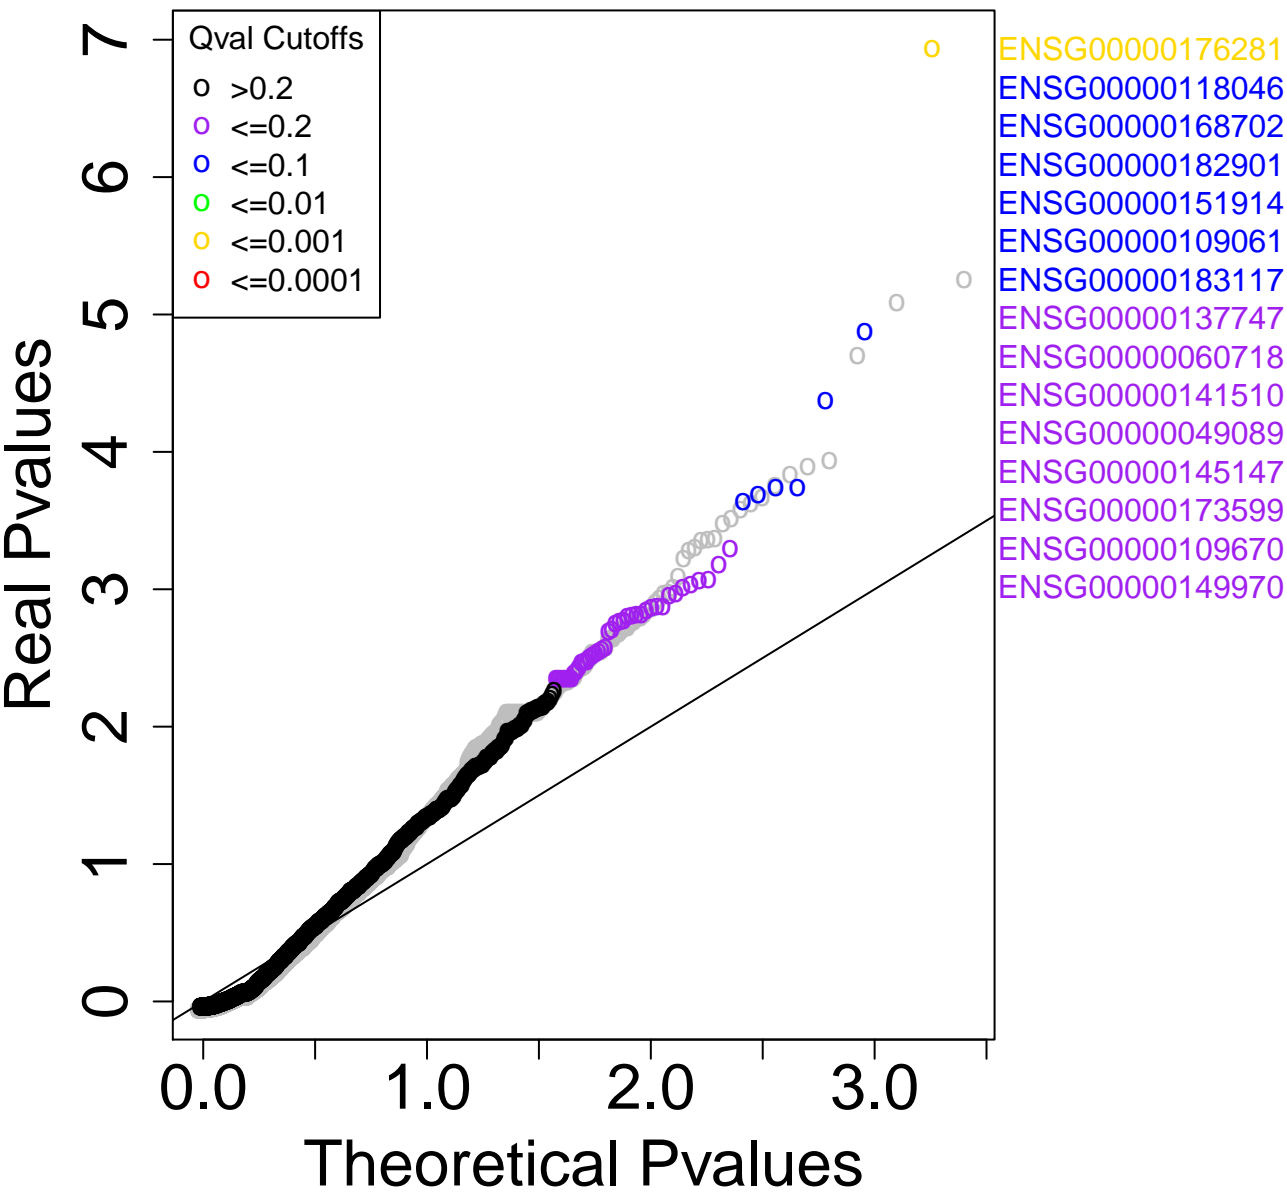

# OncodriveFM Lymphoma B-cell – 144 genes

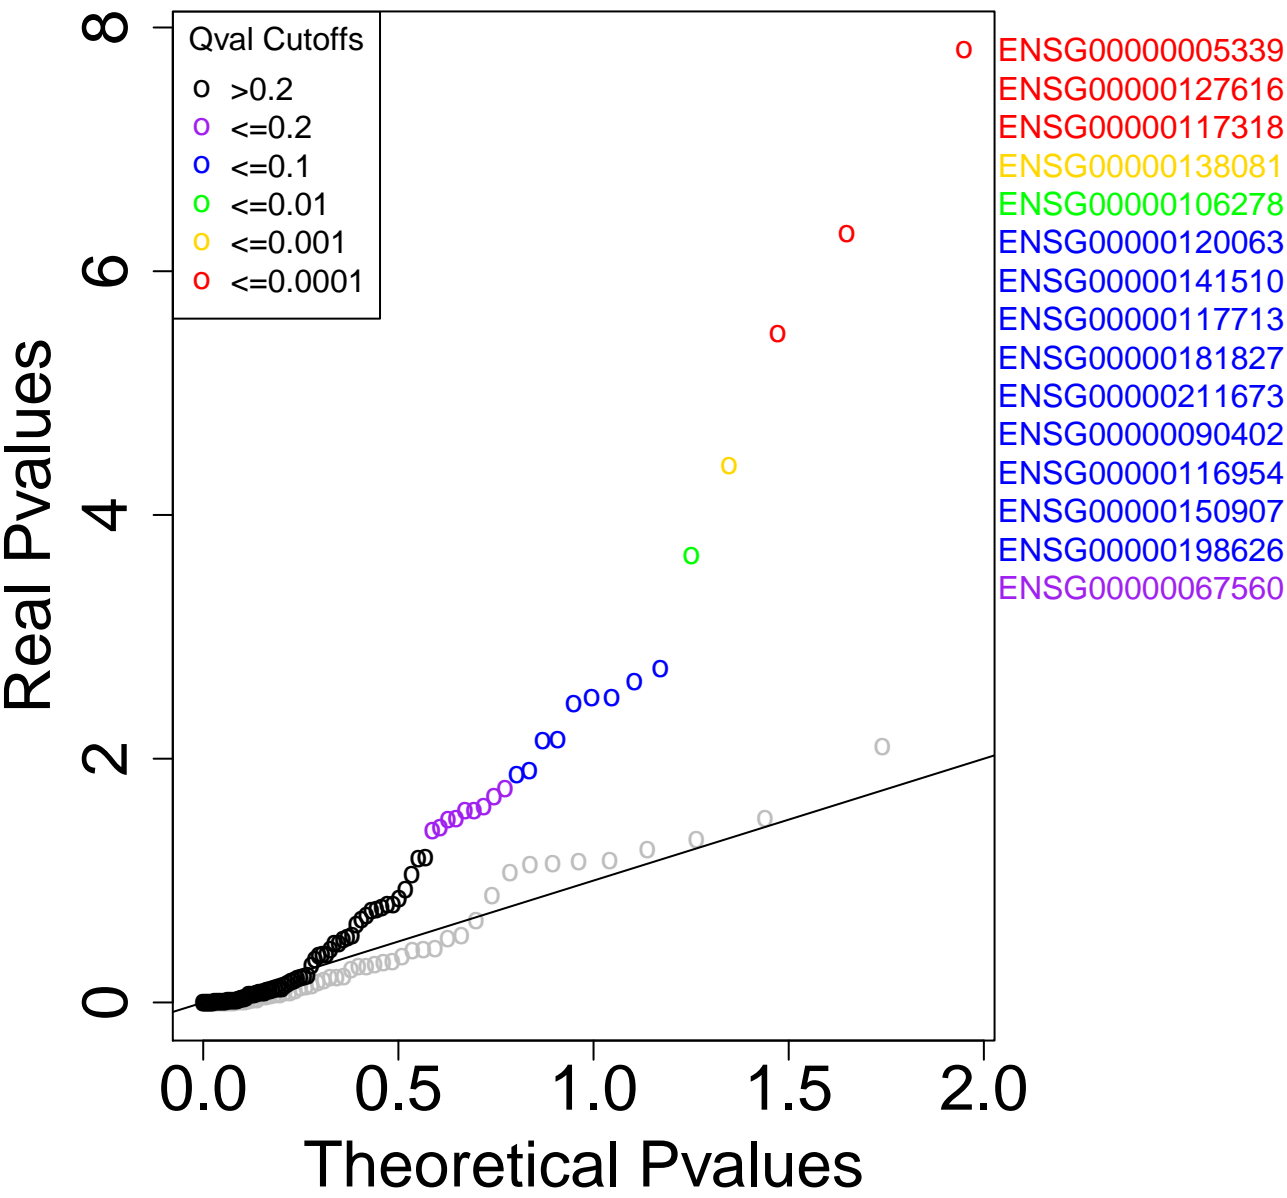

# OncodriveFM Medulloblastoma – 203 genes

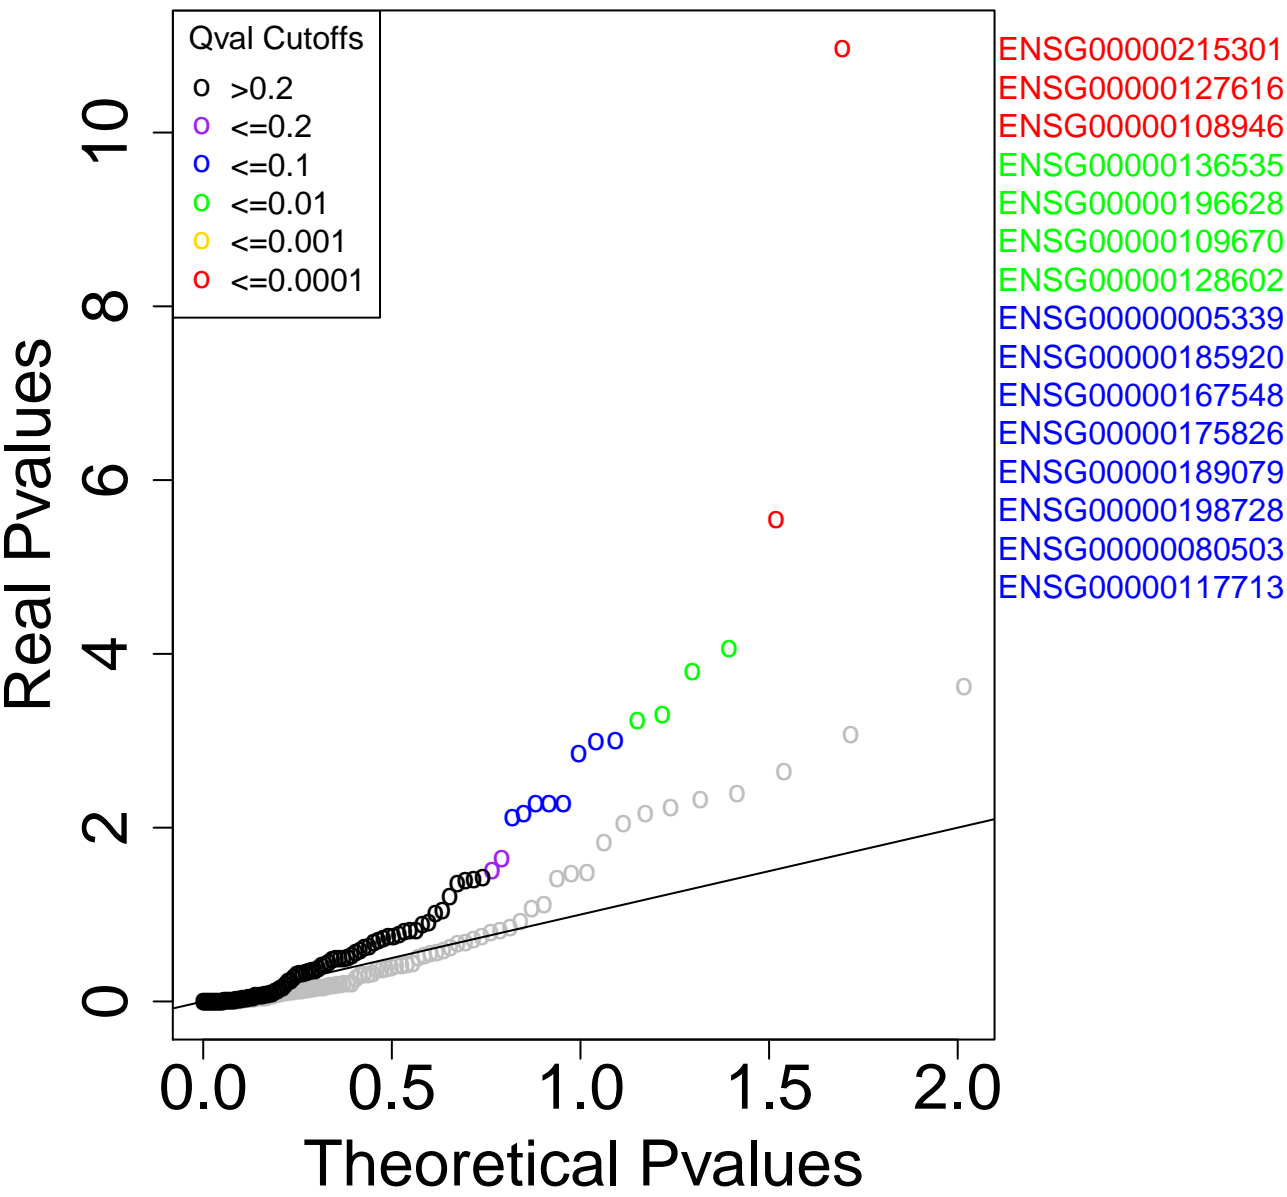

# OncodriveFM Pancancer – 23195 genes

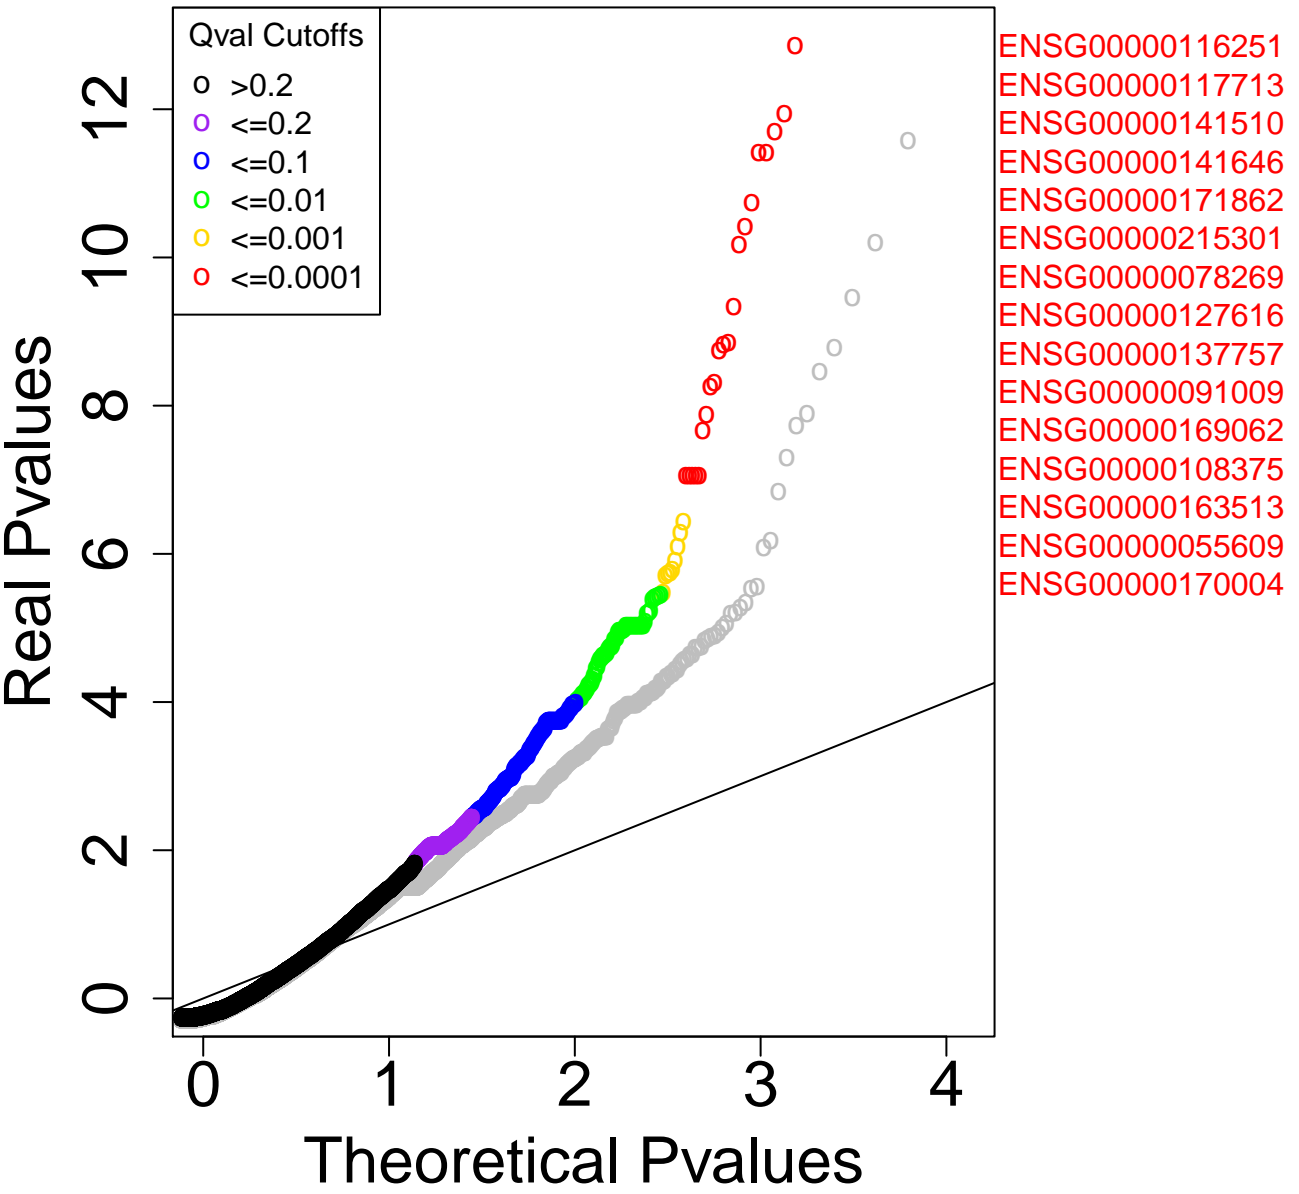

# OncodriveFM Pancreas – 89 genes

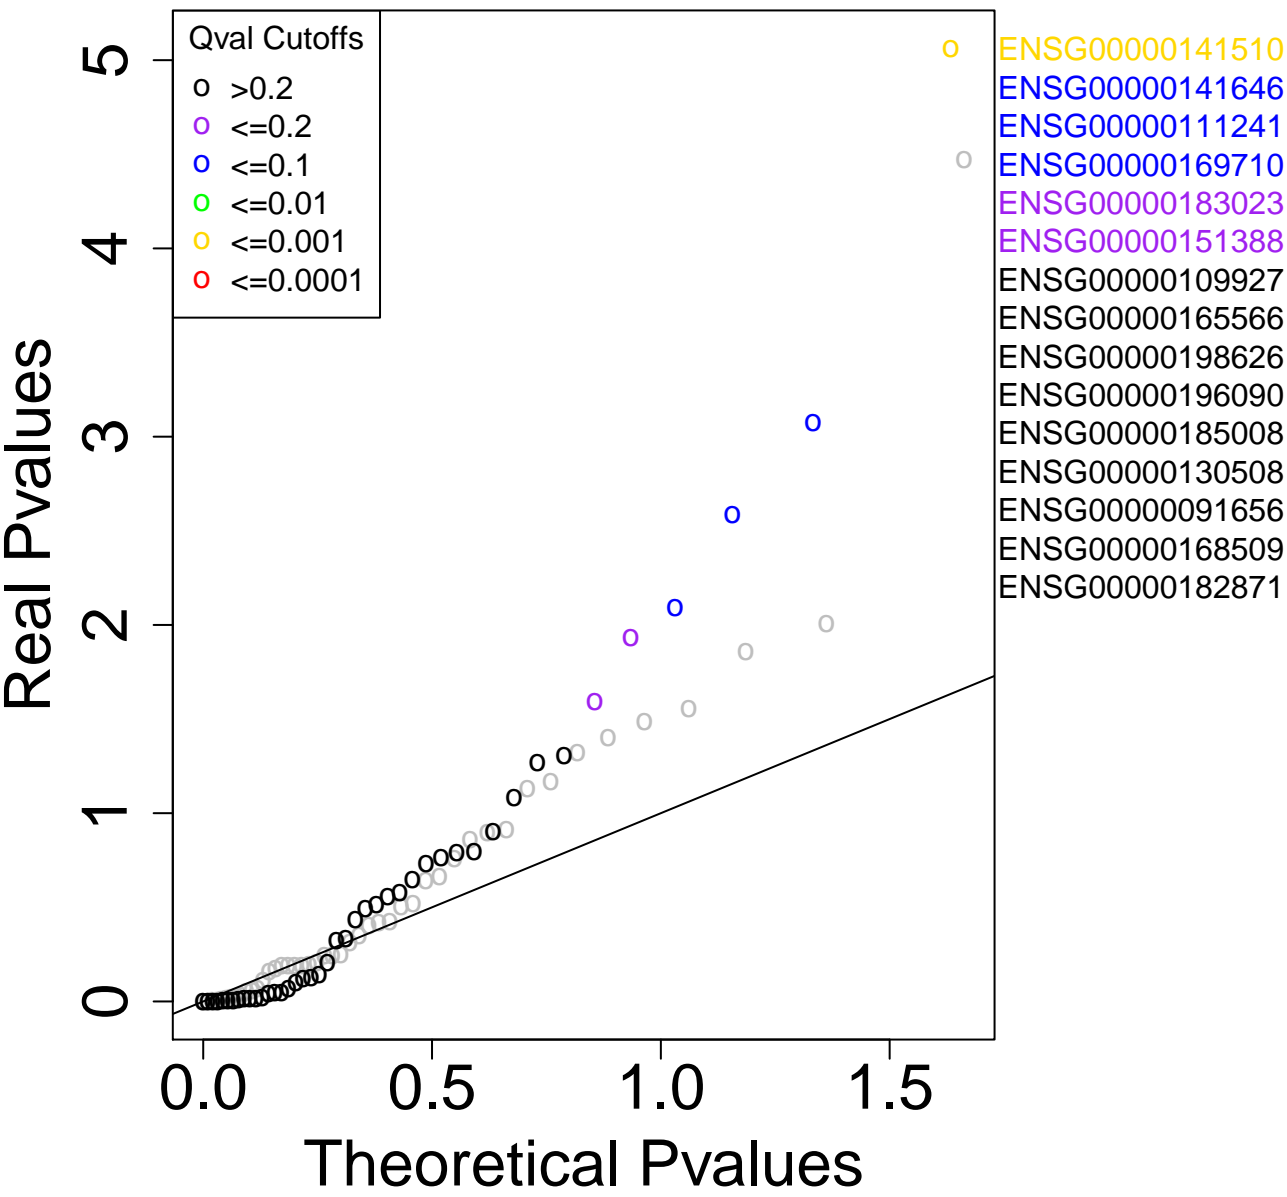

# OncodriveFM Pilocytic astrocytoma – 4 genes

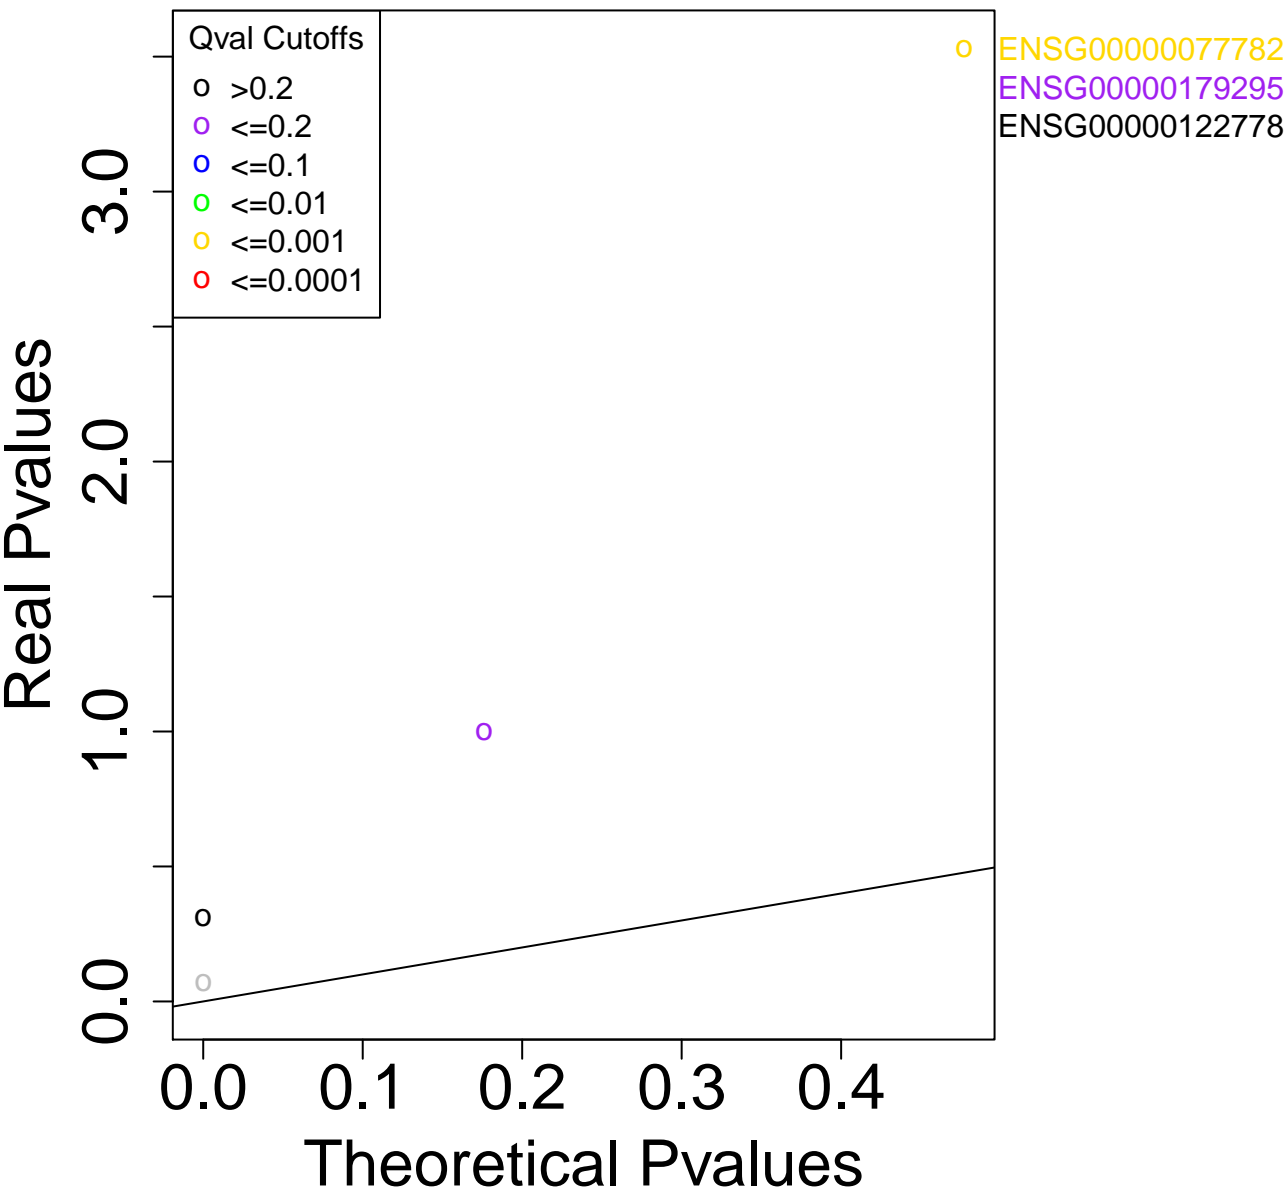



# OncodriveFM Stad – 12899 genes

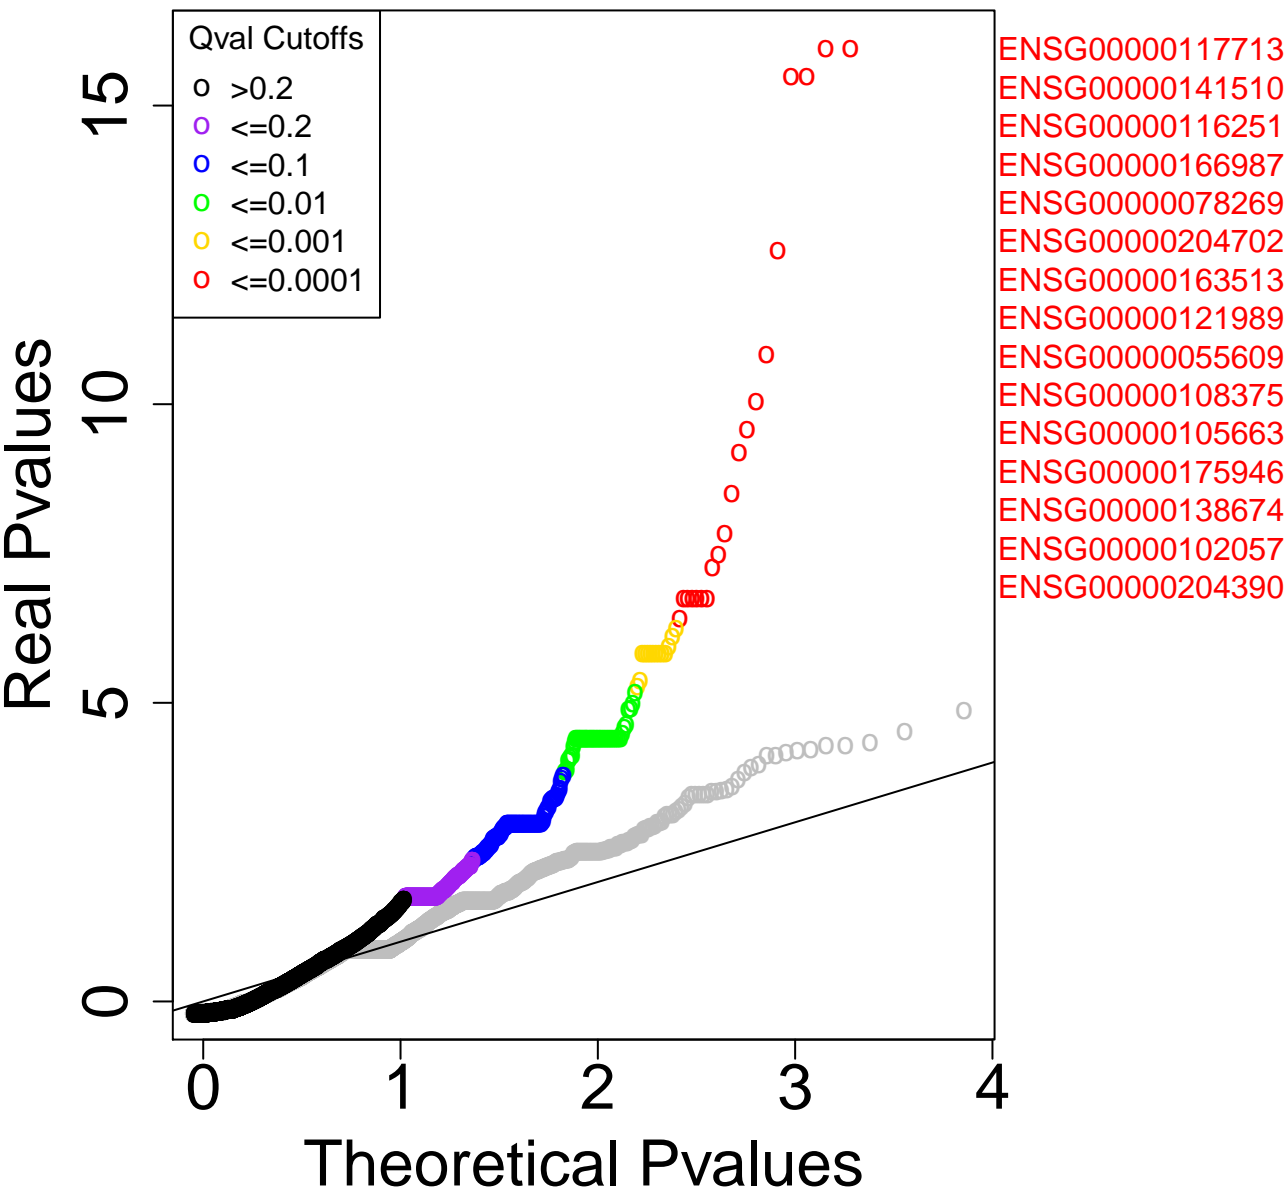

# Supplementary Figure S12

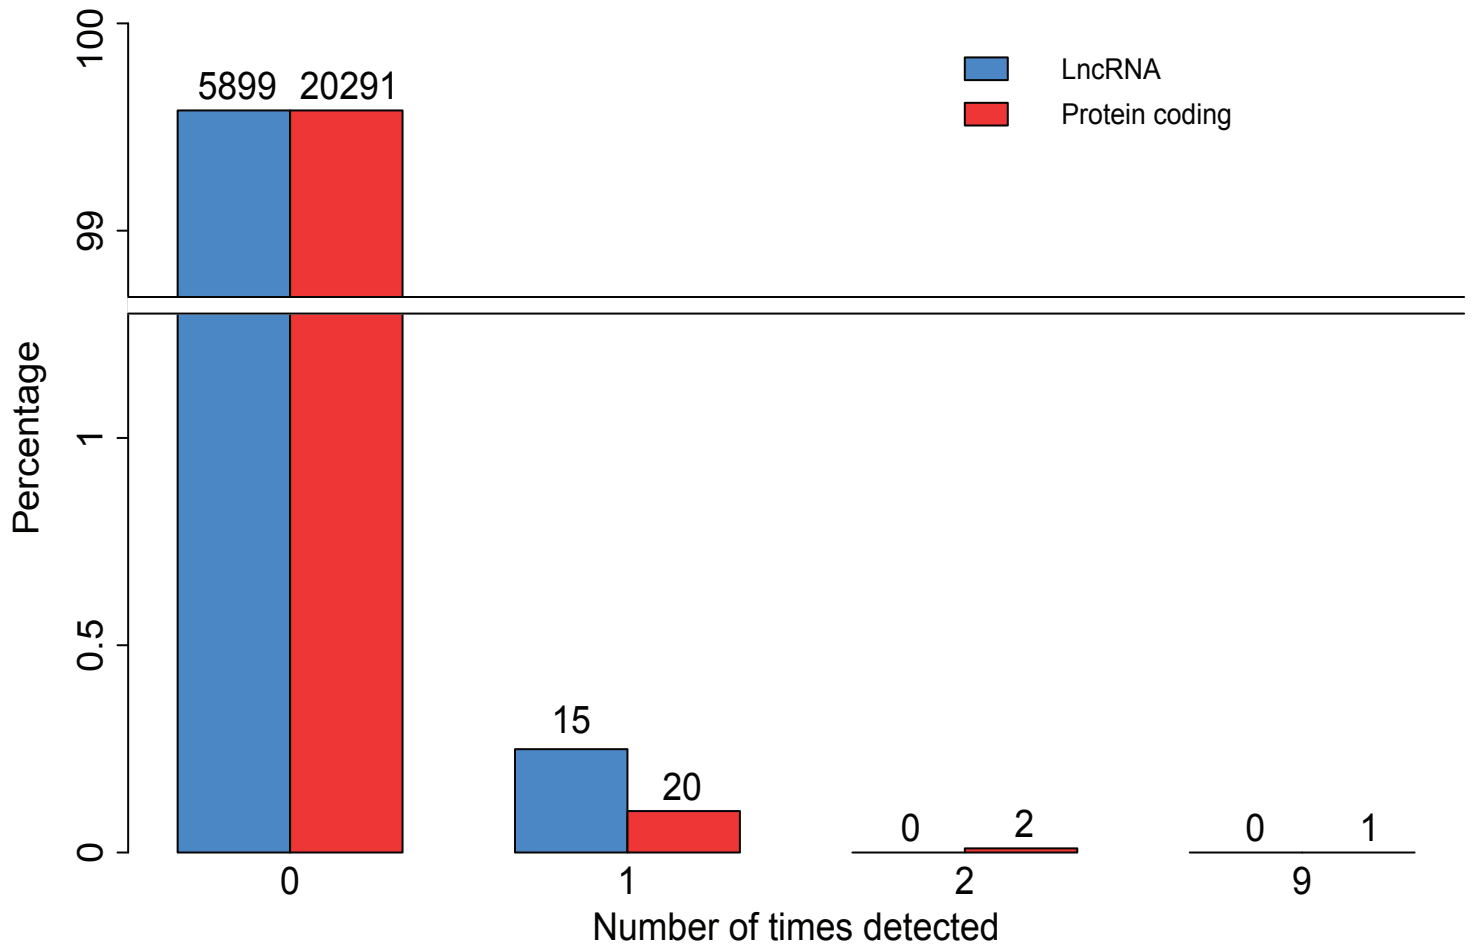

12a5ba81-91e2-40a4-8fa6-b7f6  
0463\_9\_109262730.sam Covera

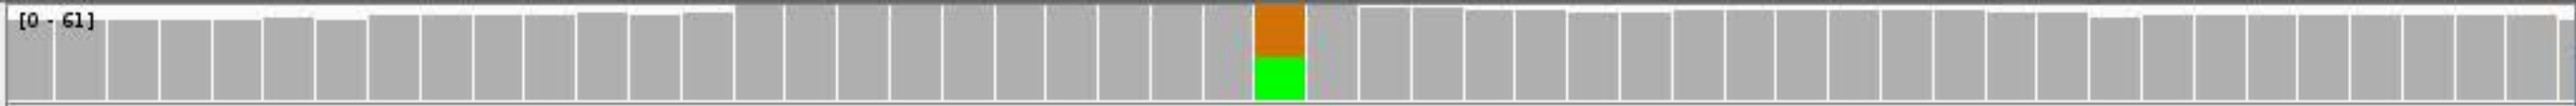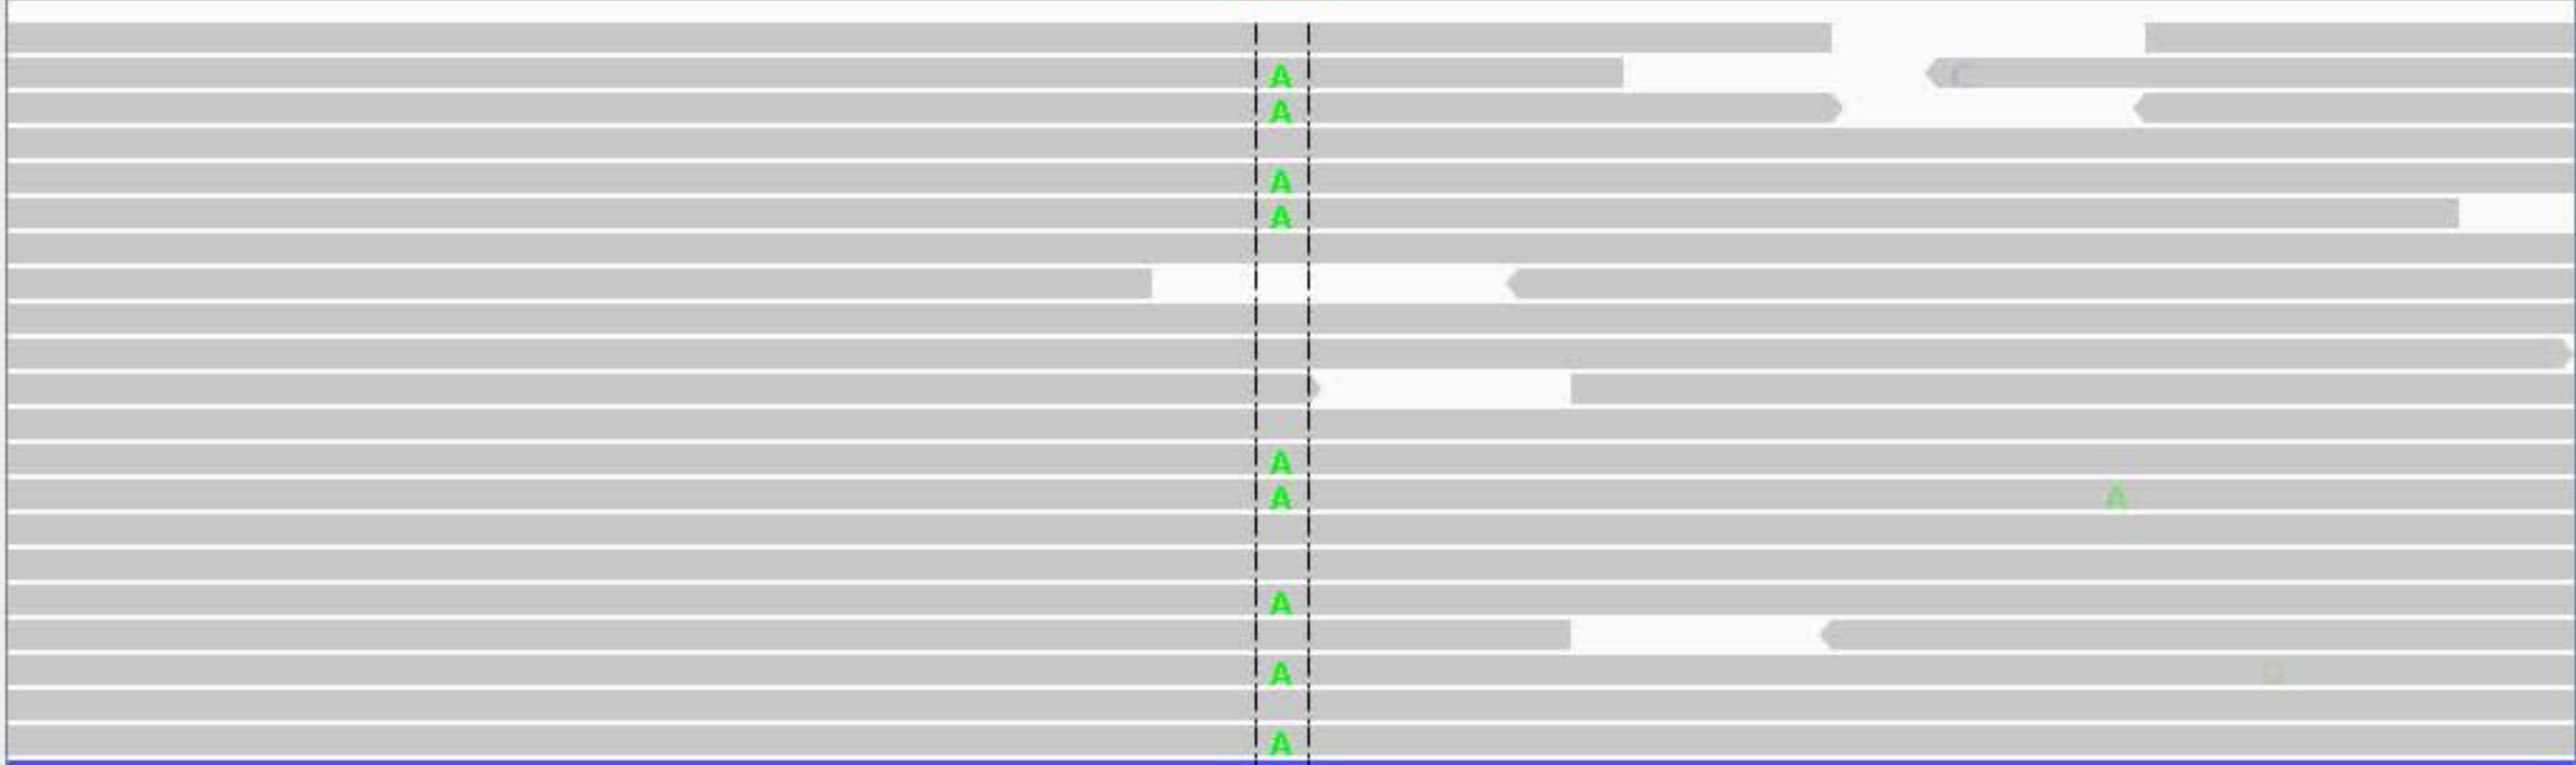

12a5ba81-91e2-40a4-8fa6-b7f6  
0463\_9\_109262730.sam

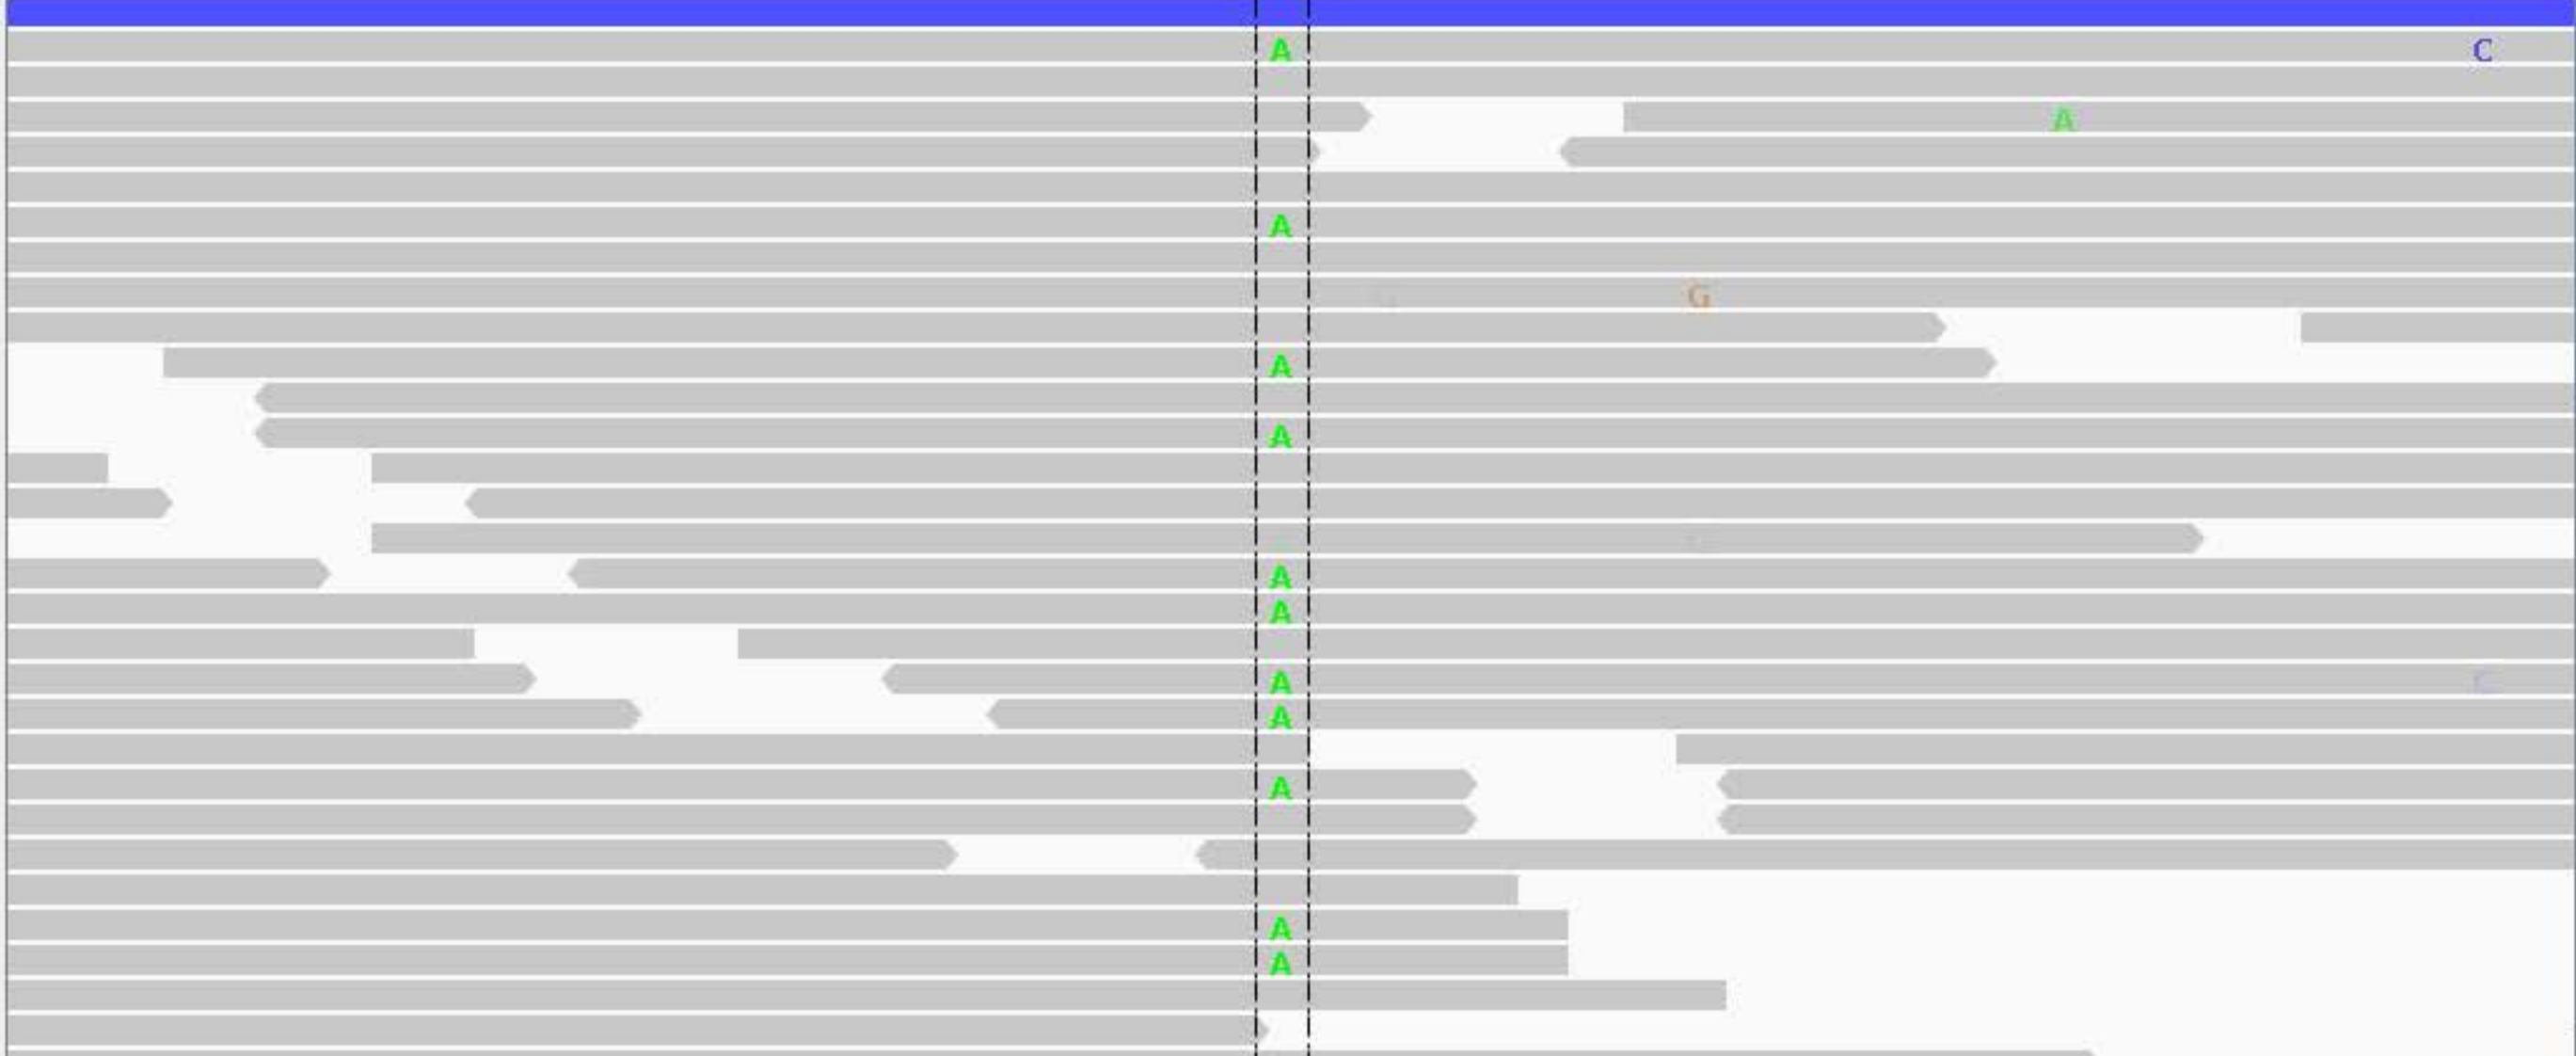

146c97a5-69dd-4863-be0b-81b  
957e\_9\_109366290.sam Coverd

[0 - 31]

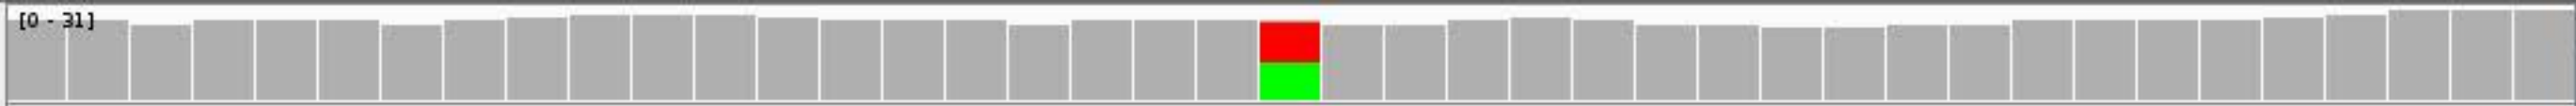

146c97a5-69dd-4863-be0b-81b  
957e\_9\_109366290.sam

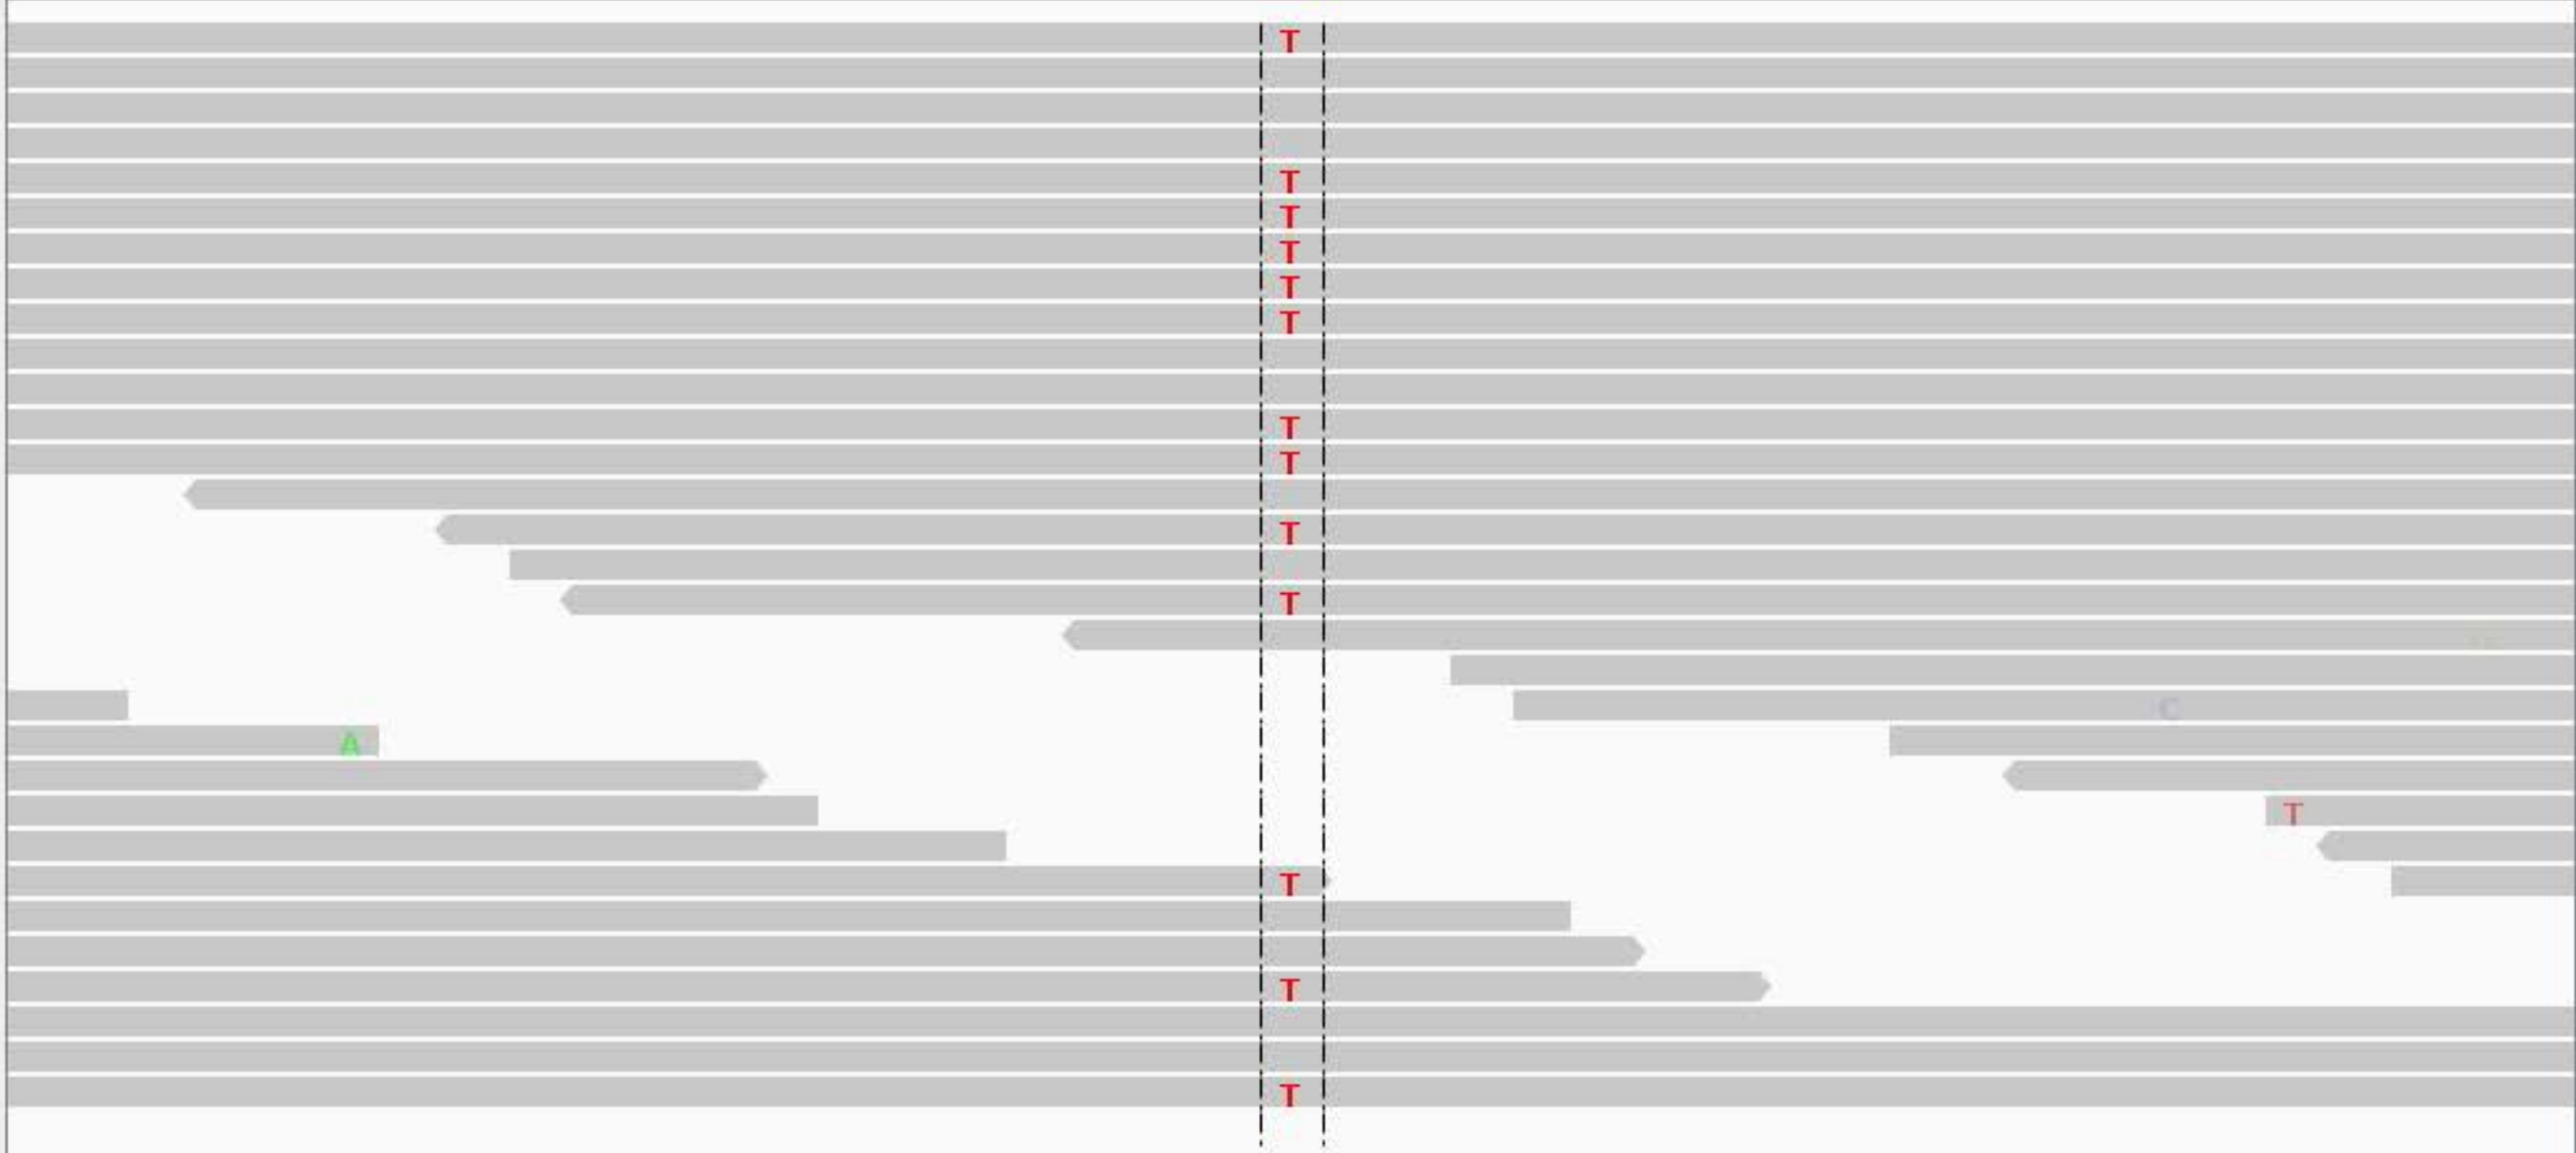



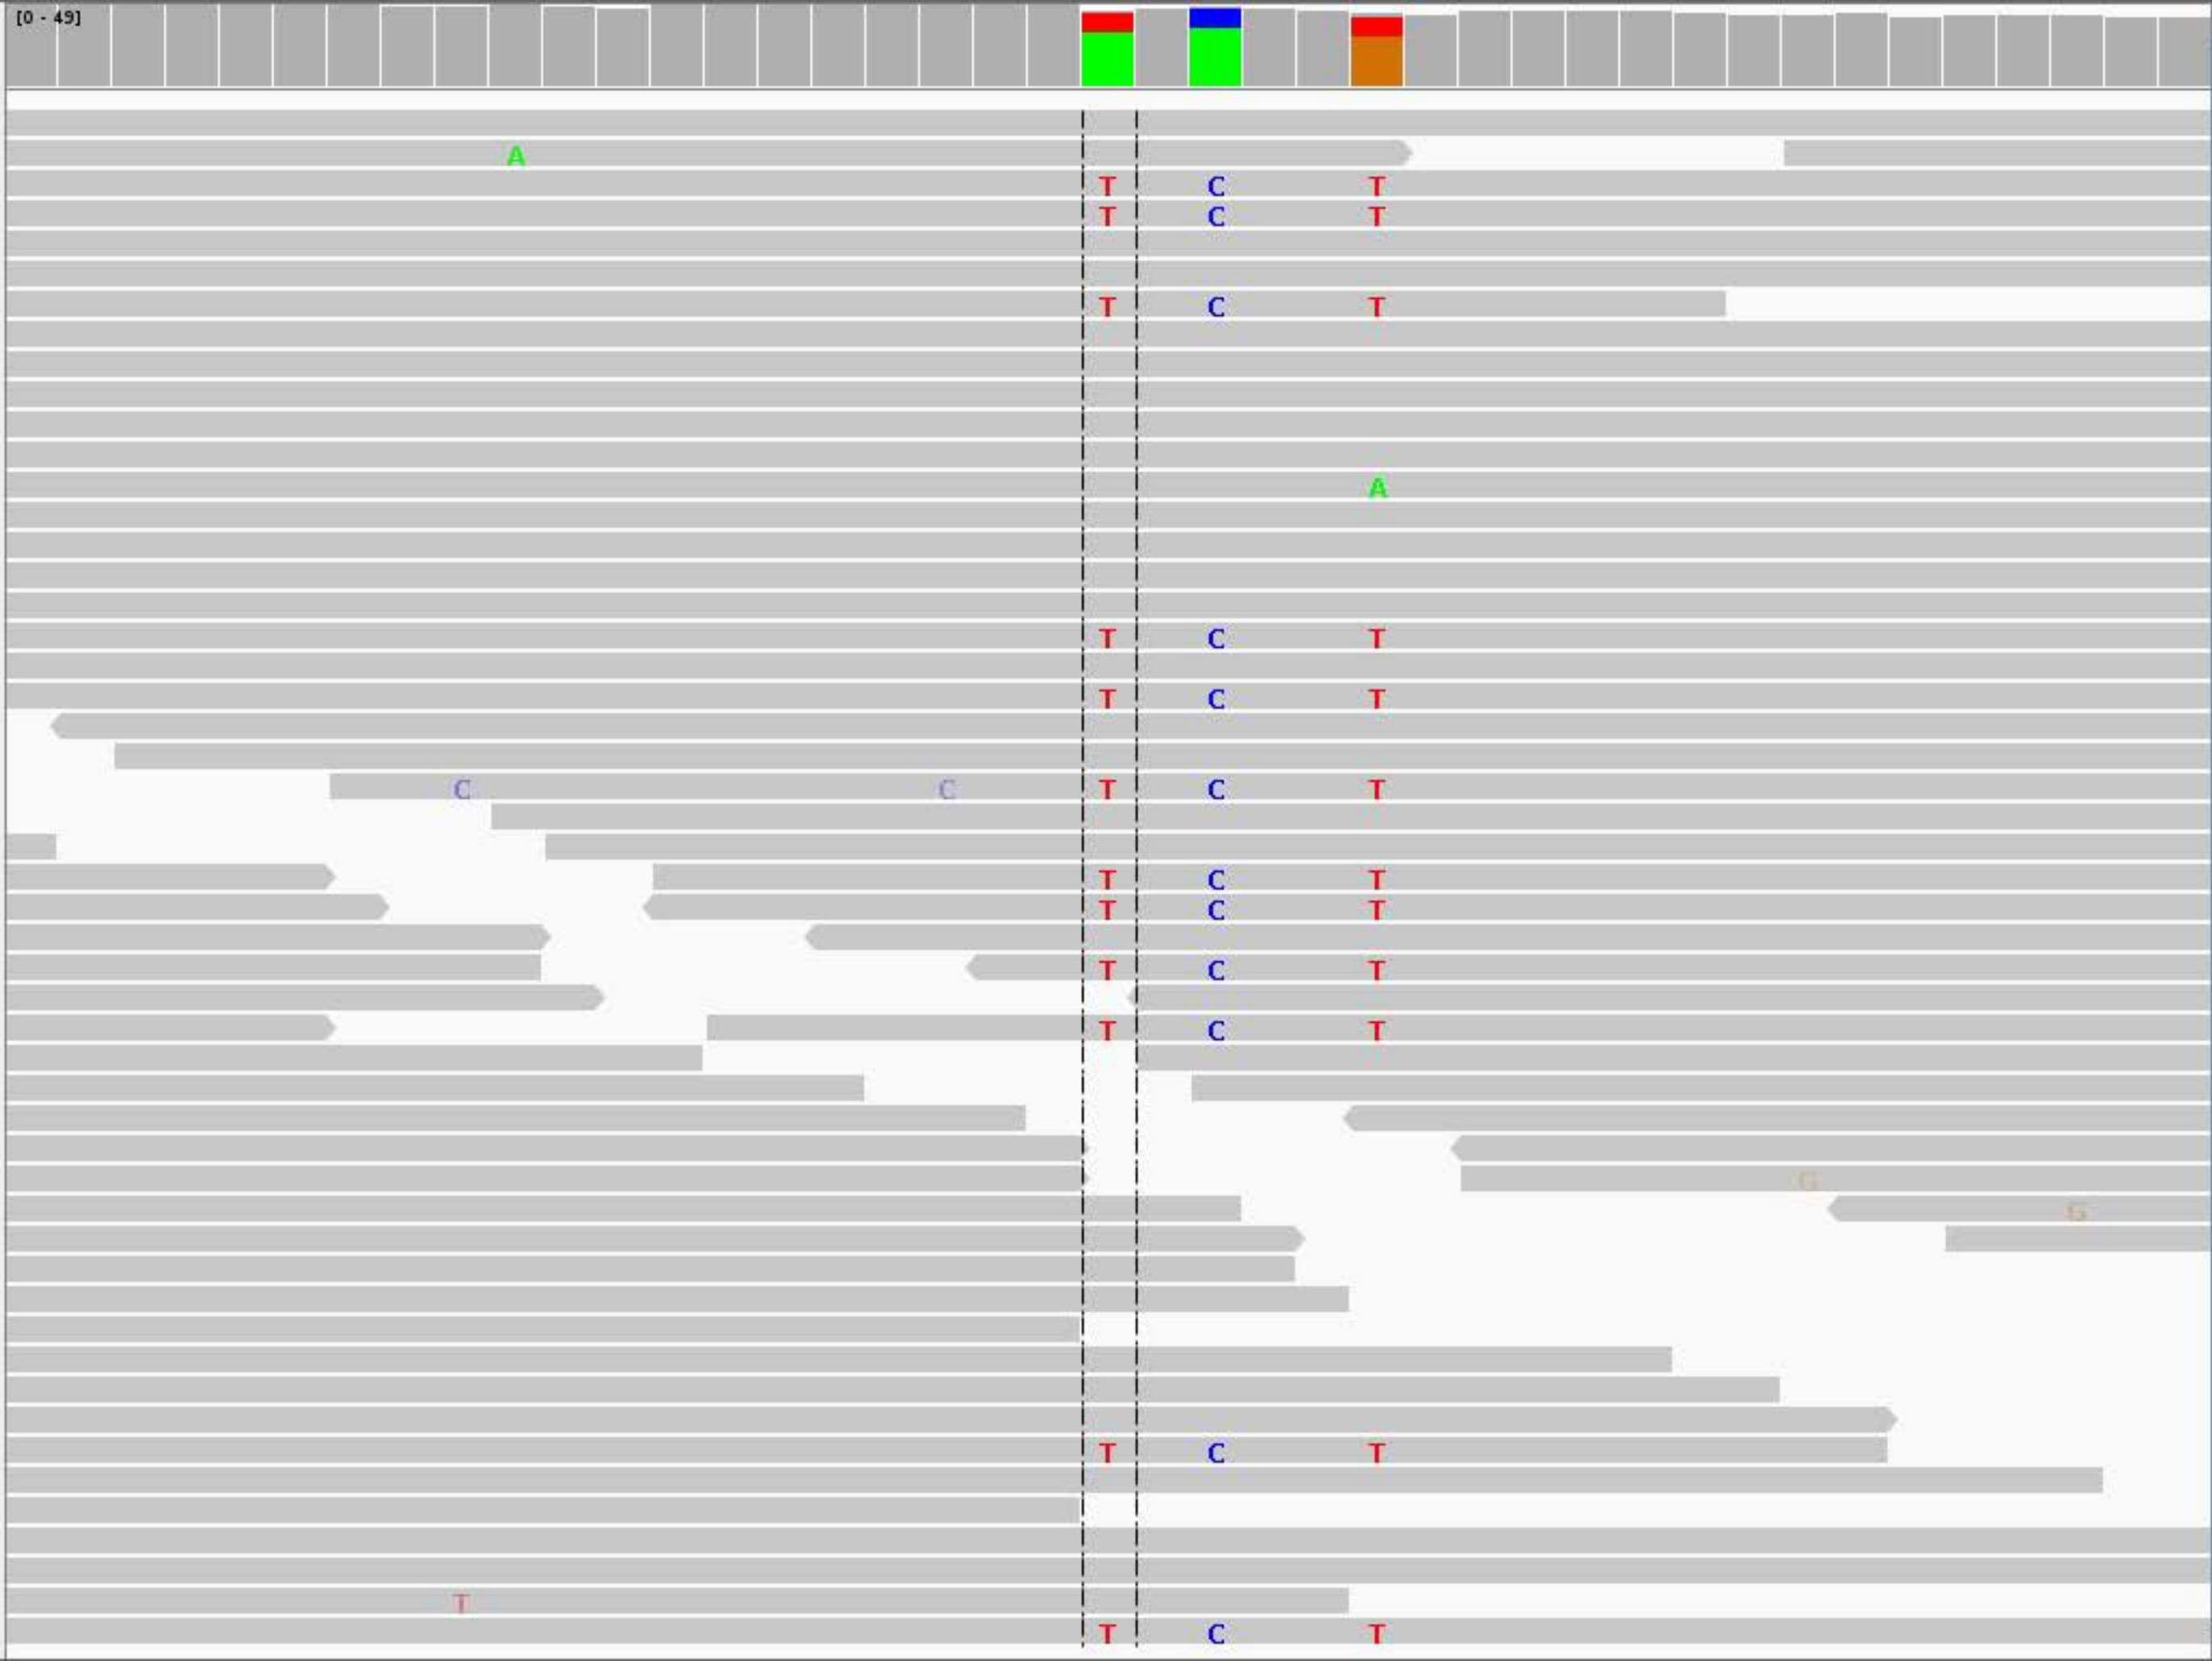

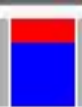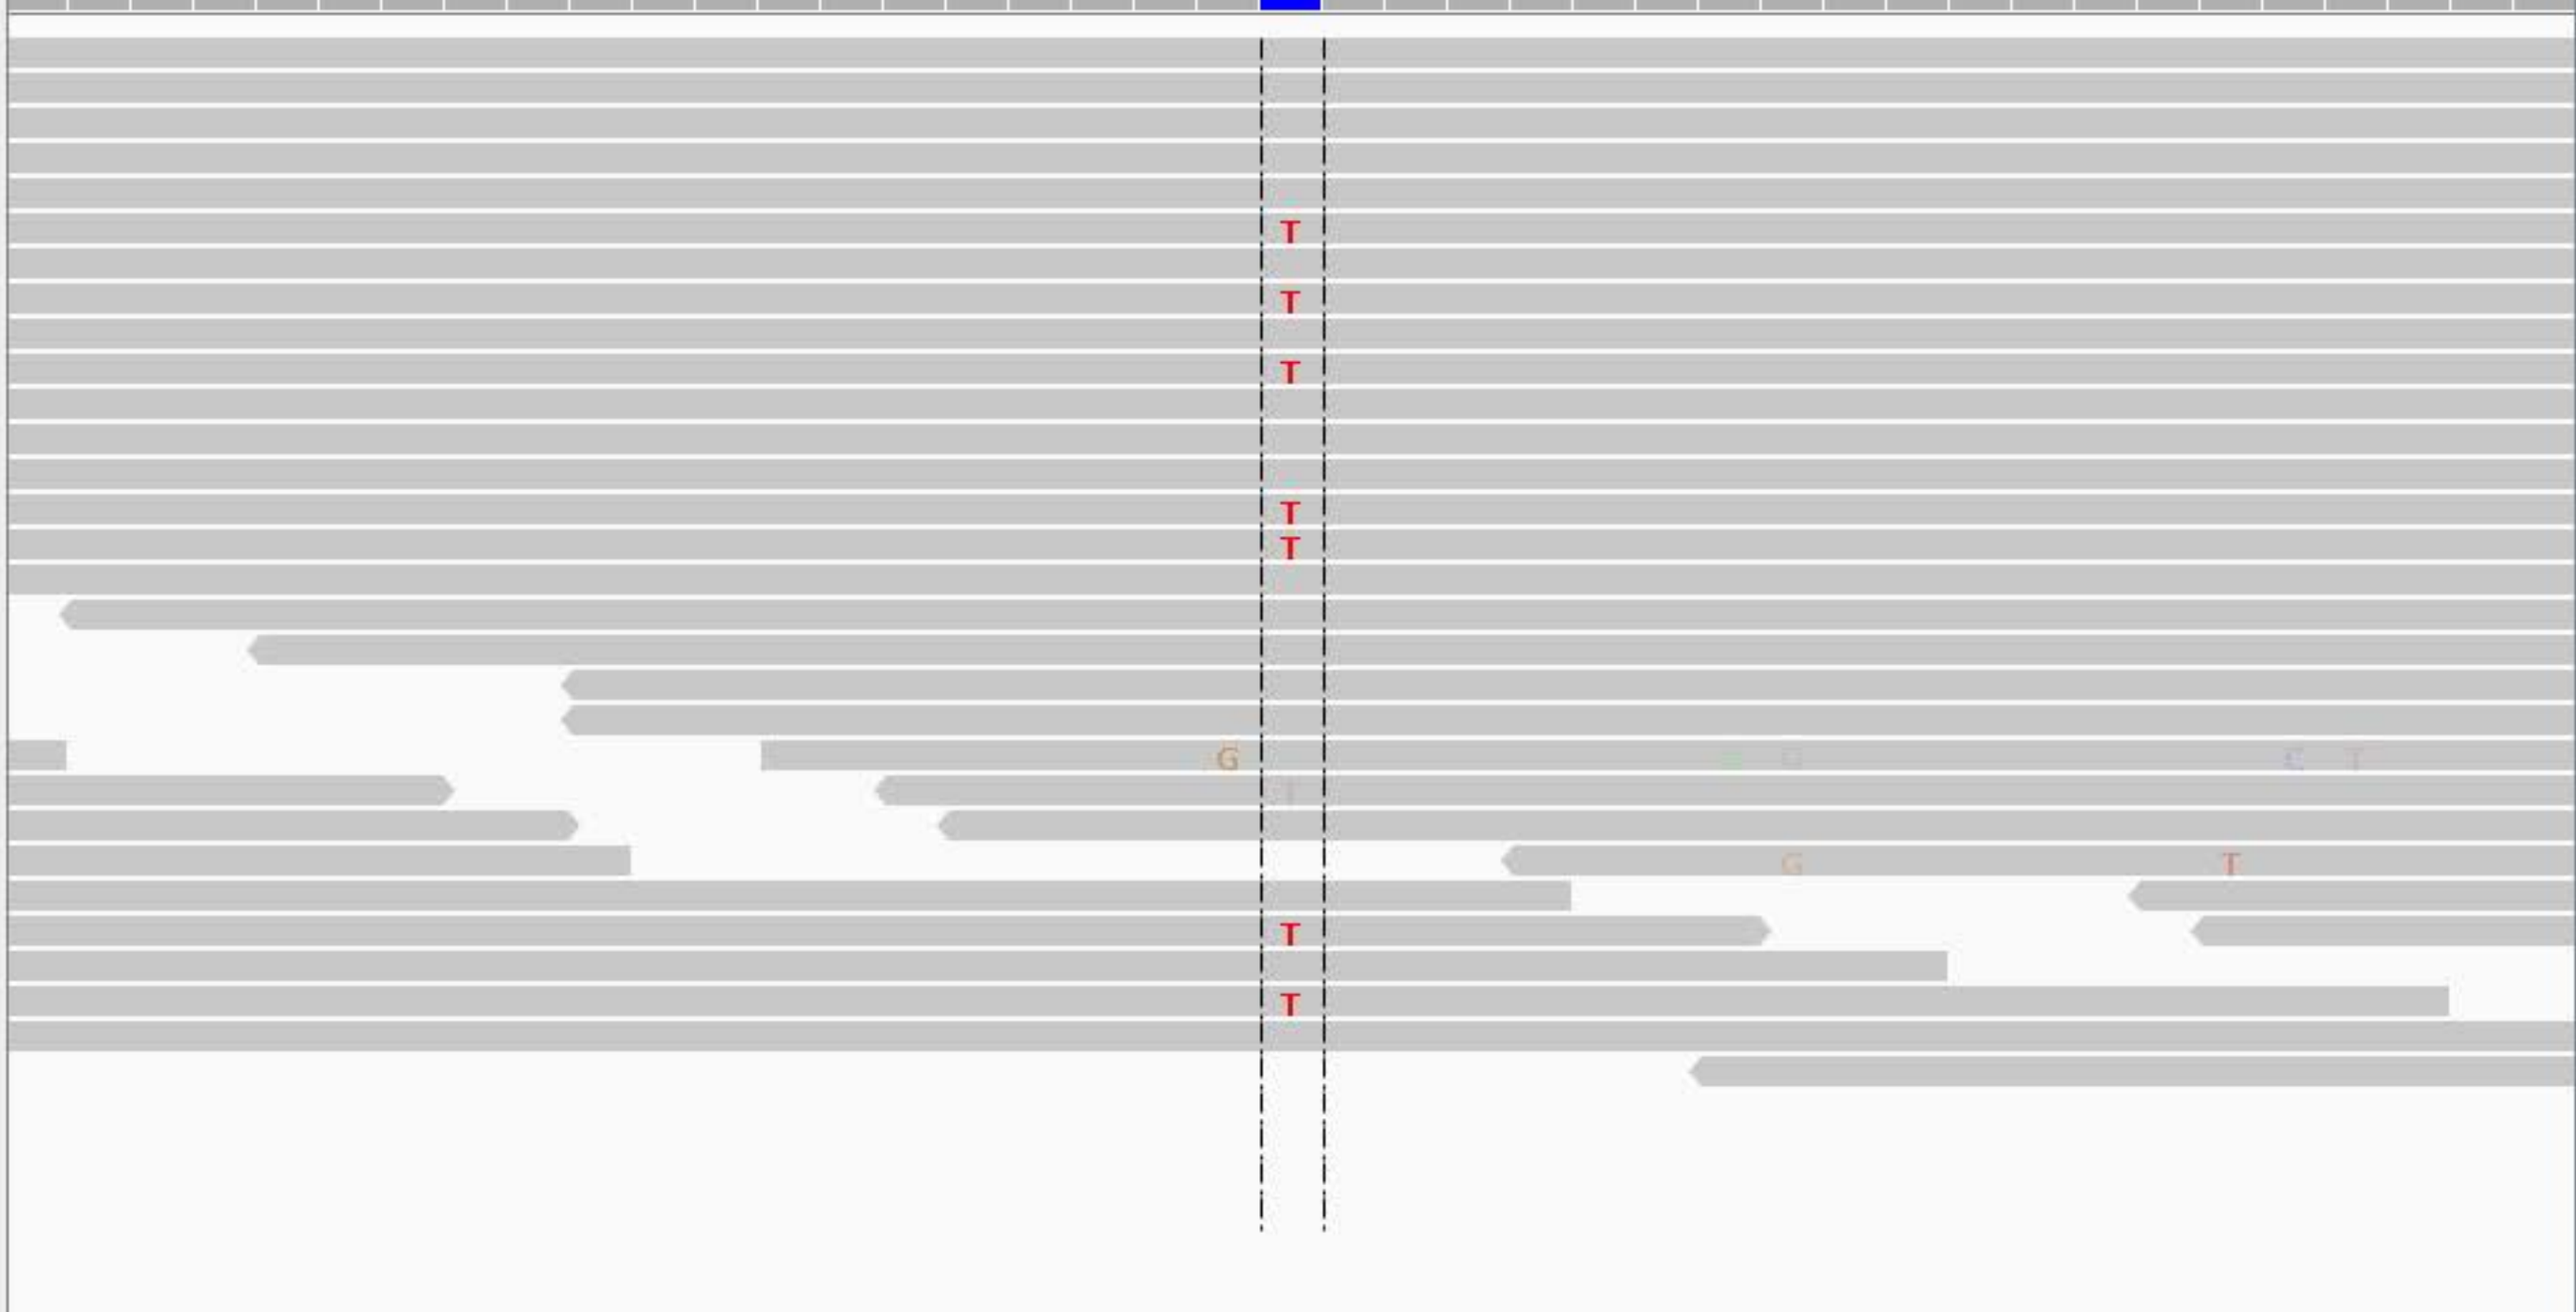

T  
T  
T  
  
T  
T  
  
G  
T  
  
T  
T

G

G G

G T

G

T

T  
T

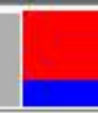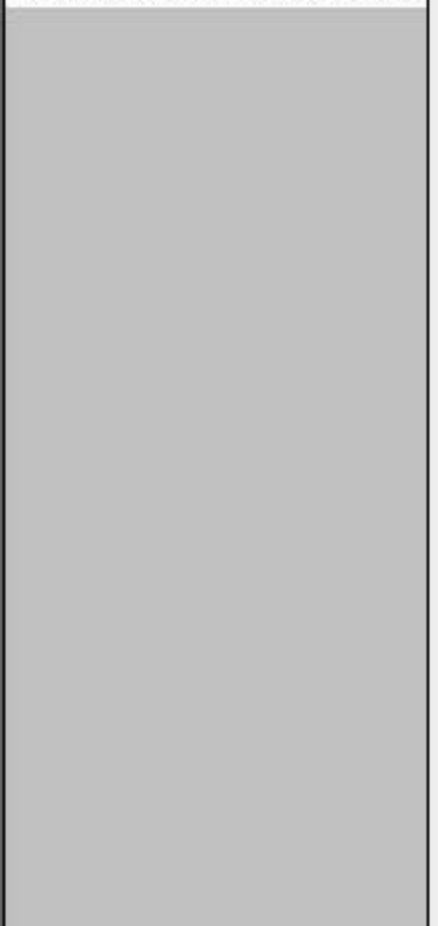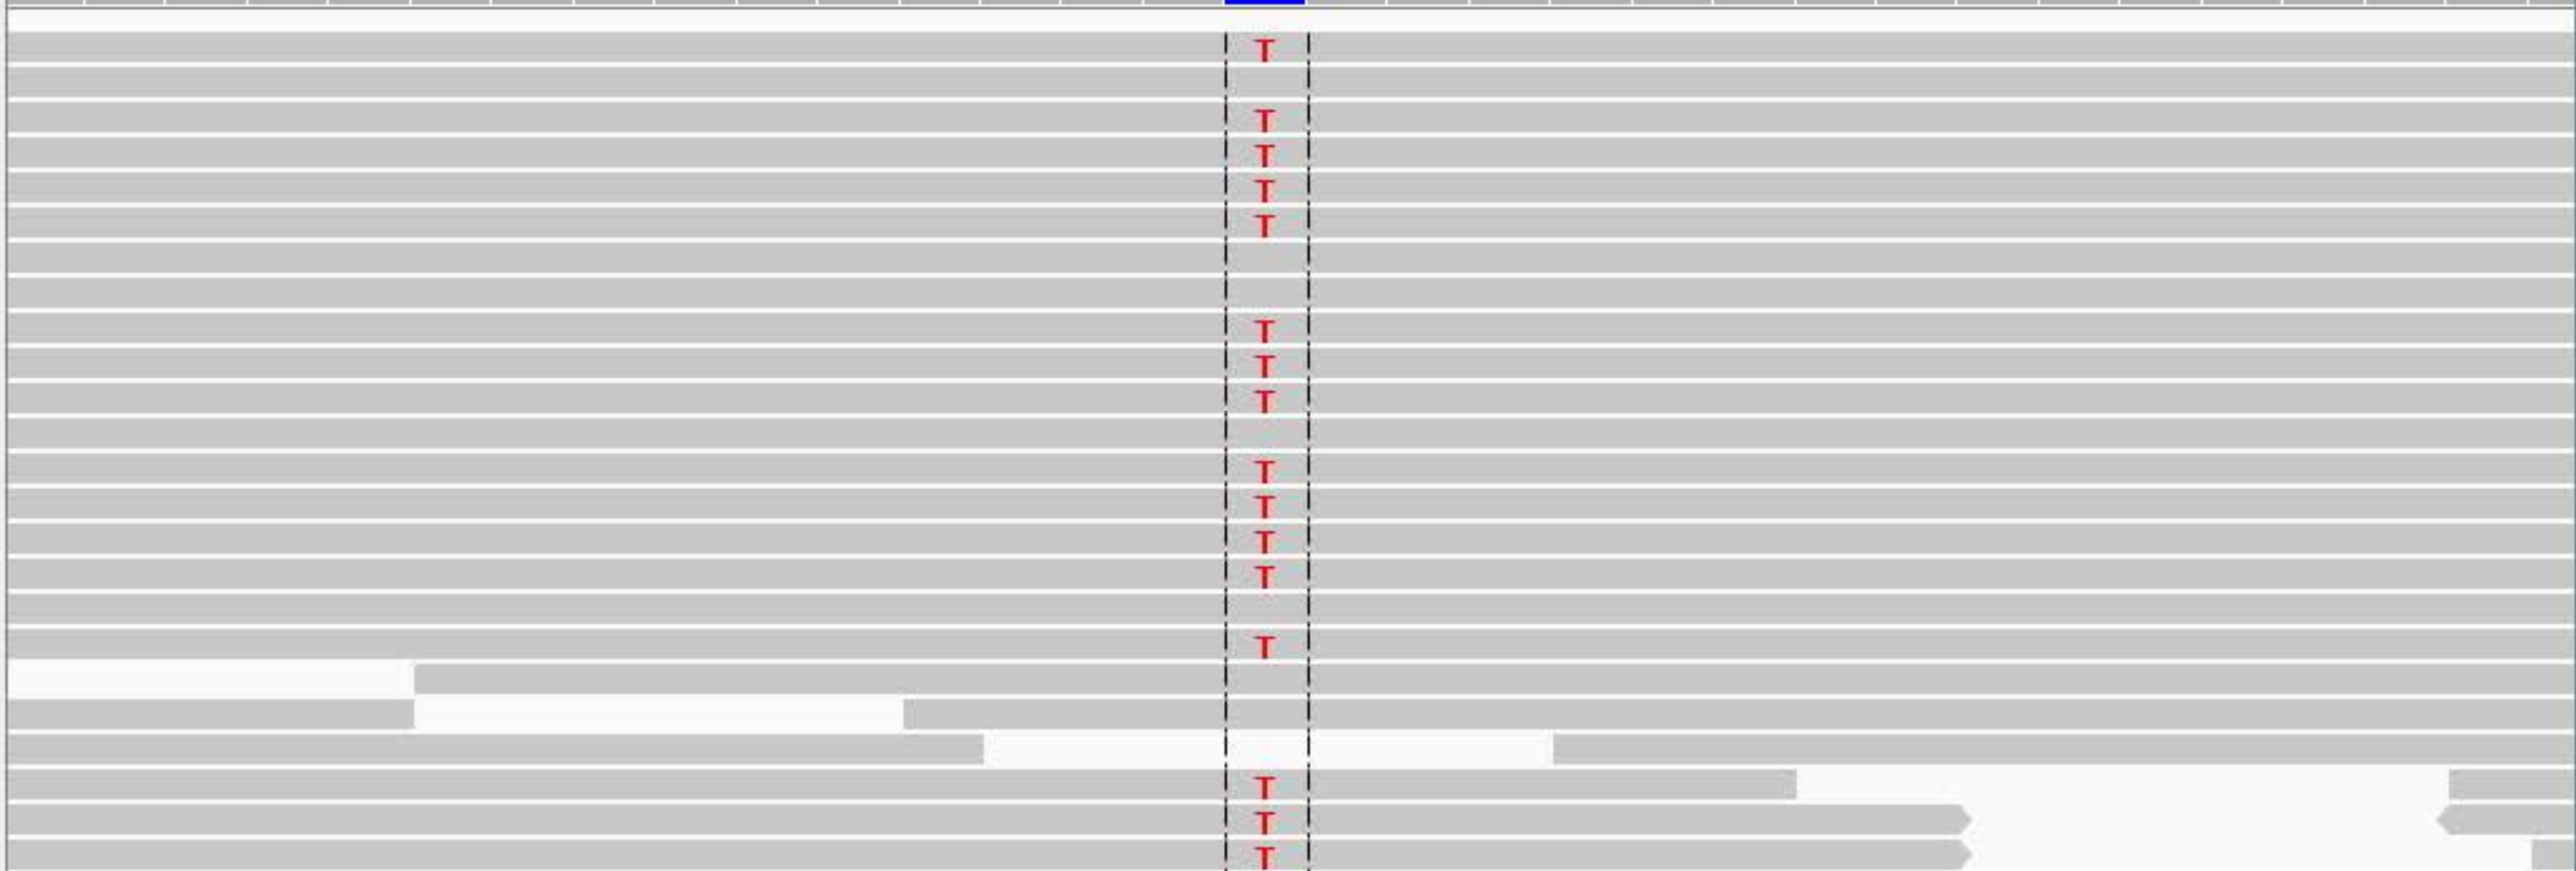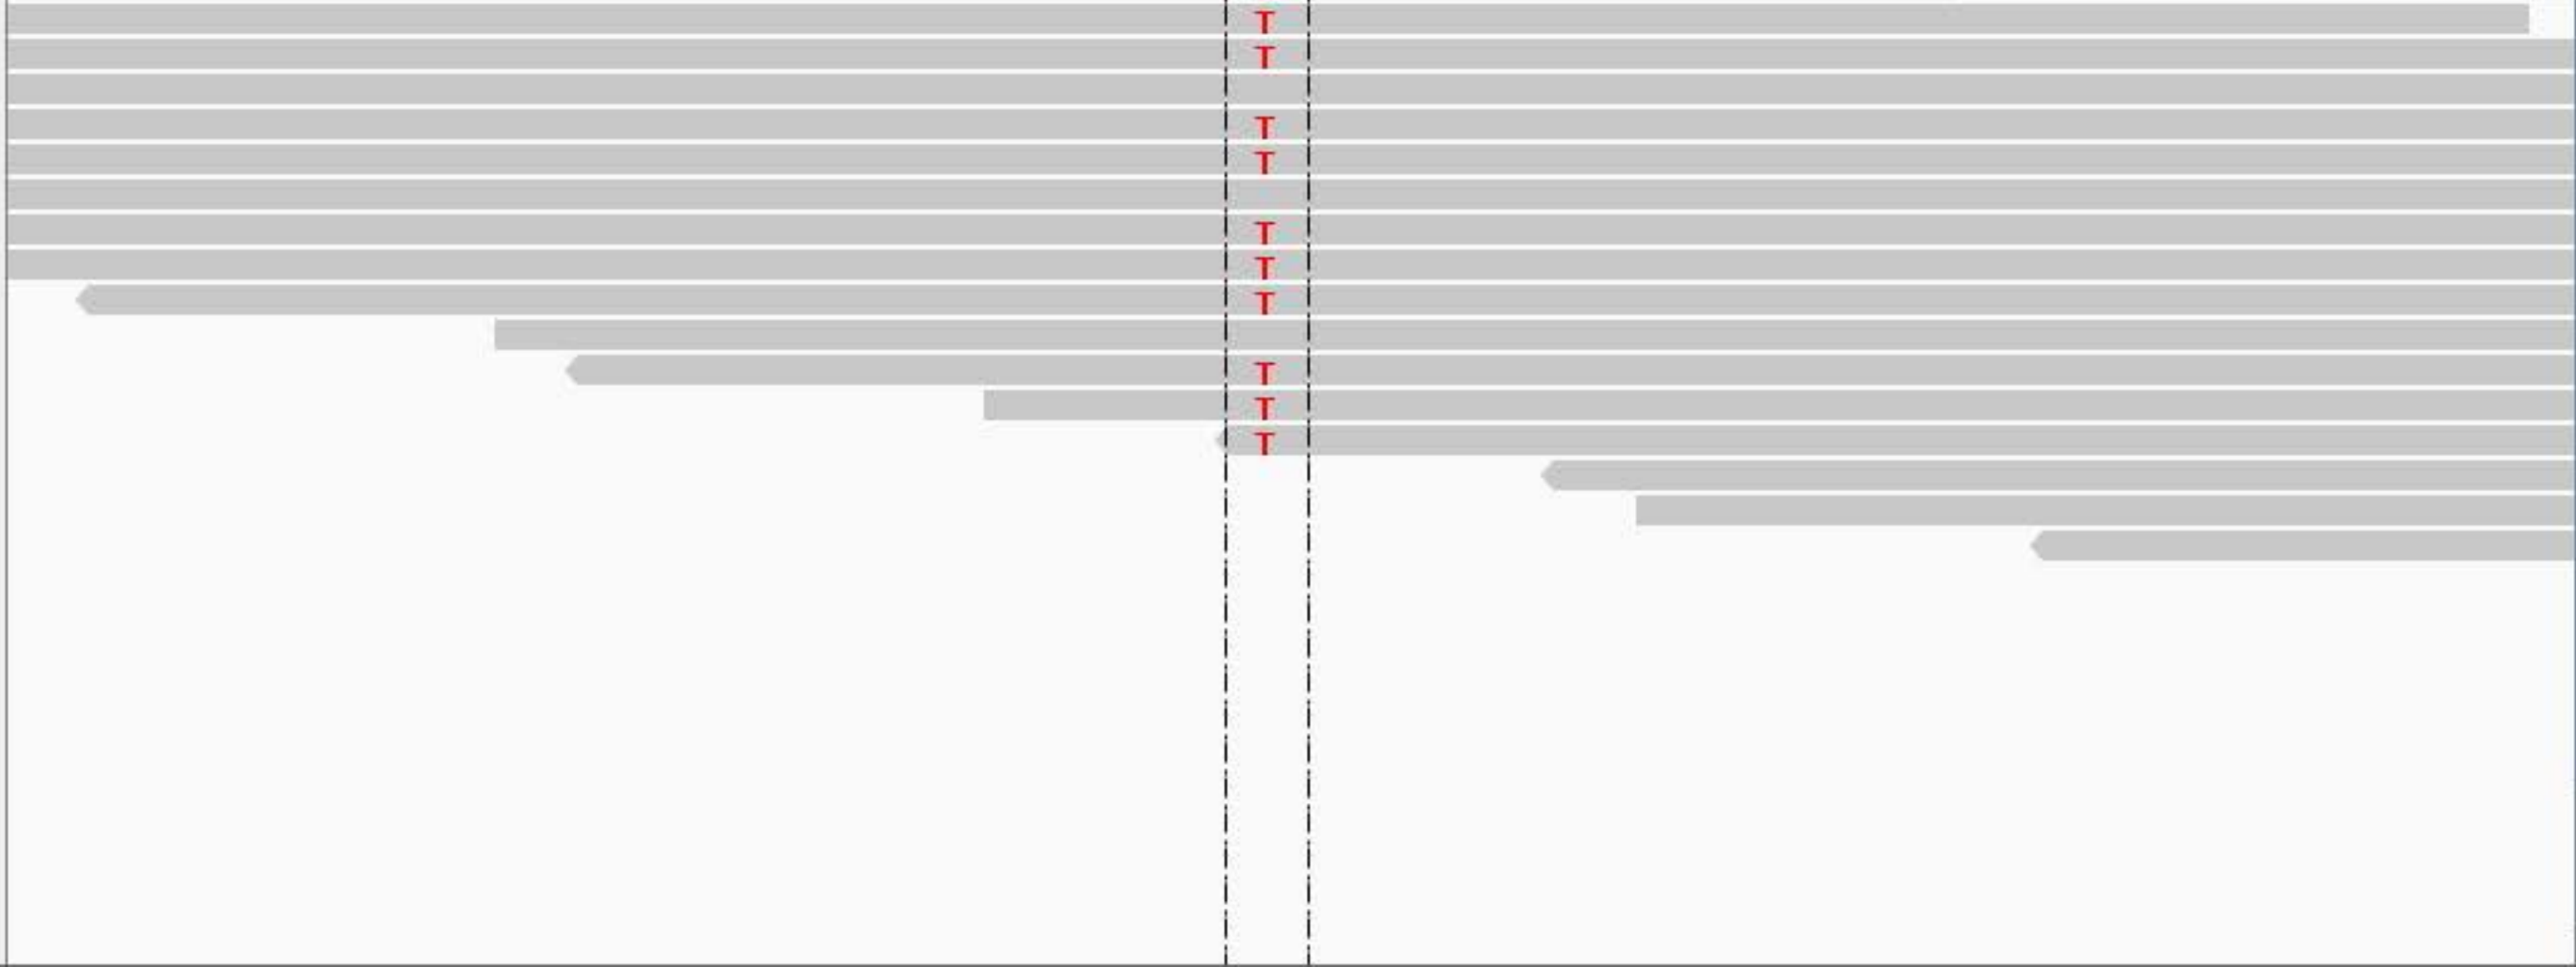



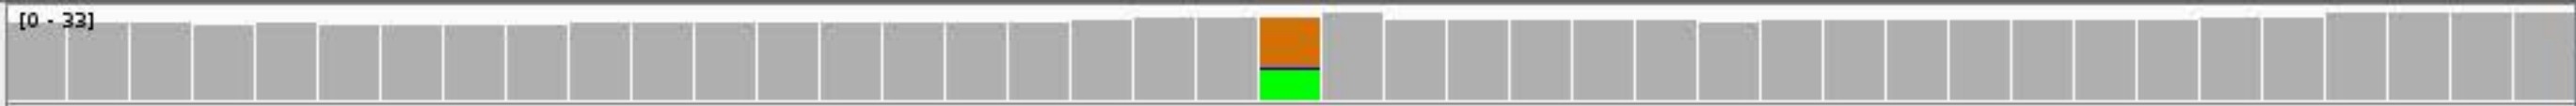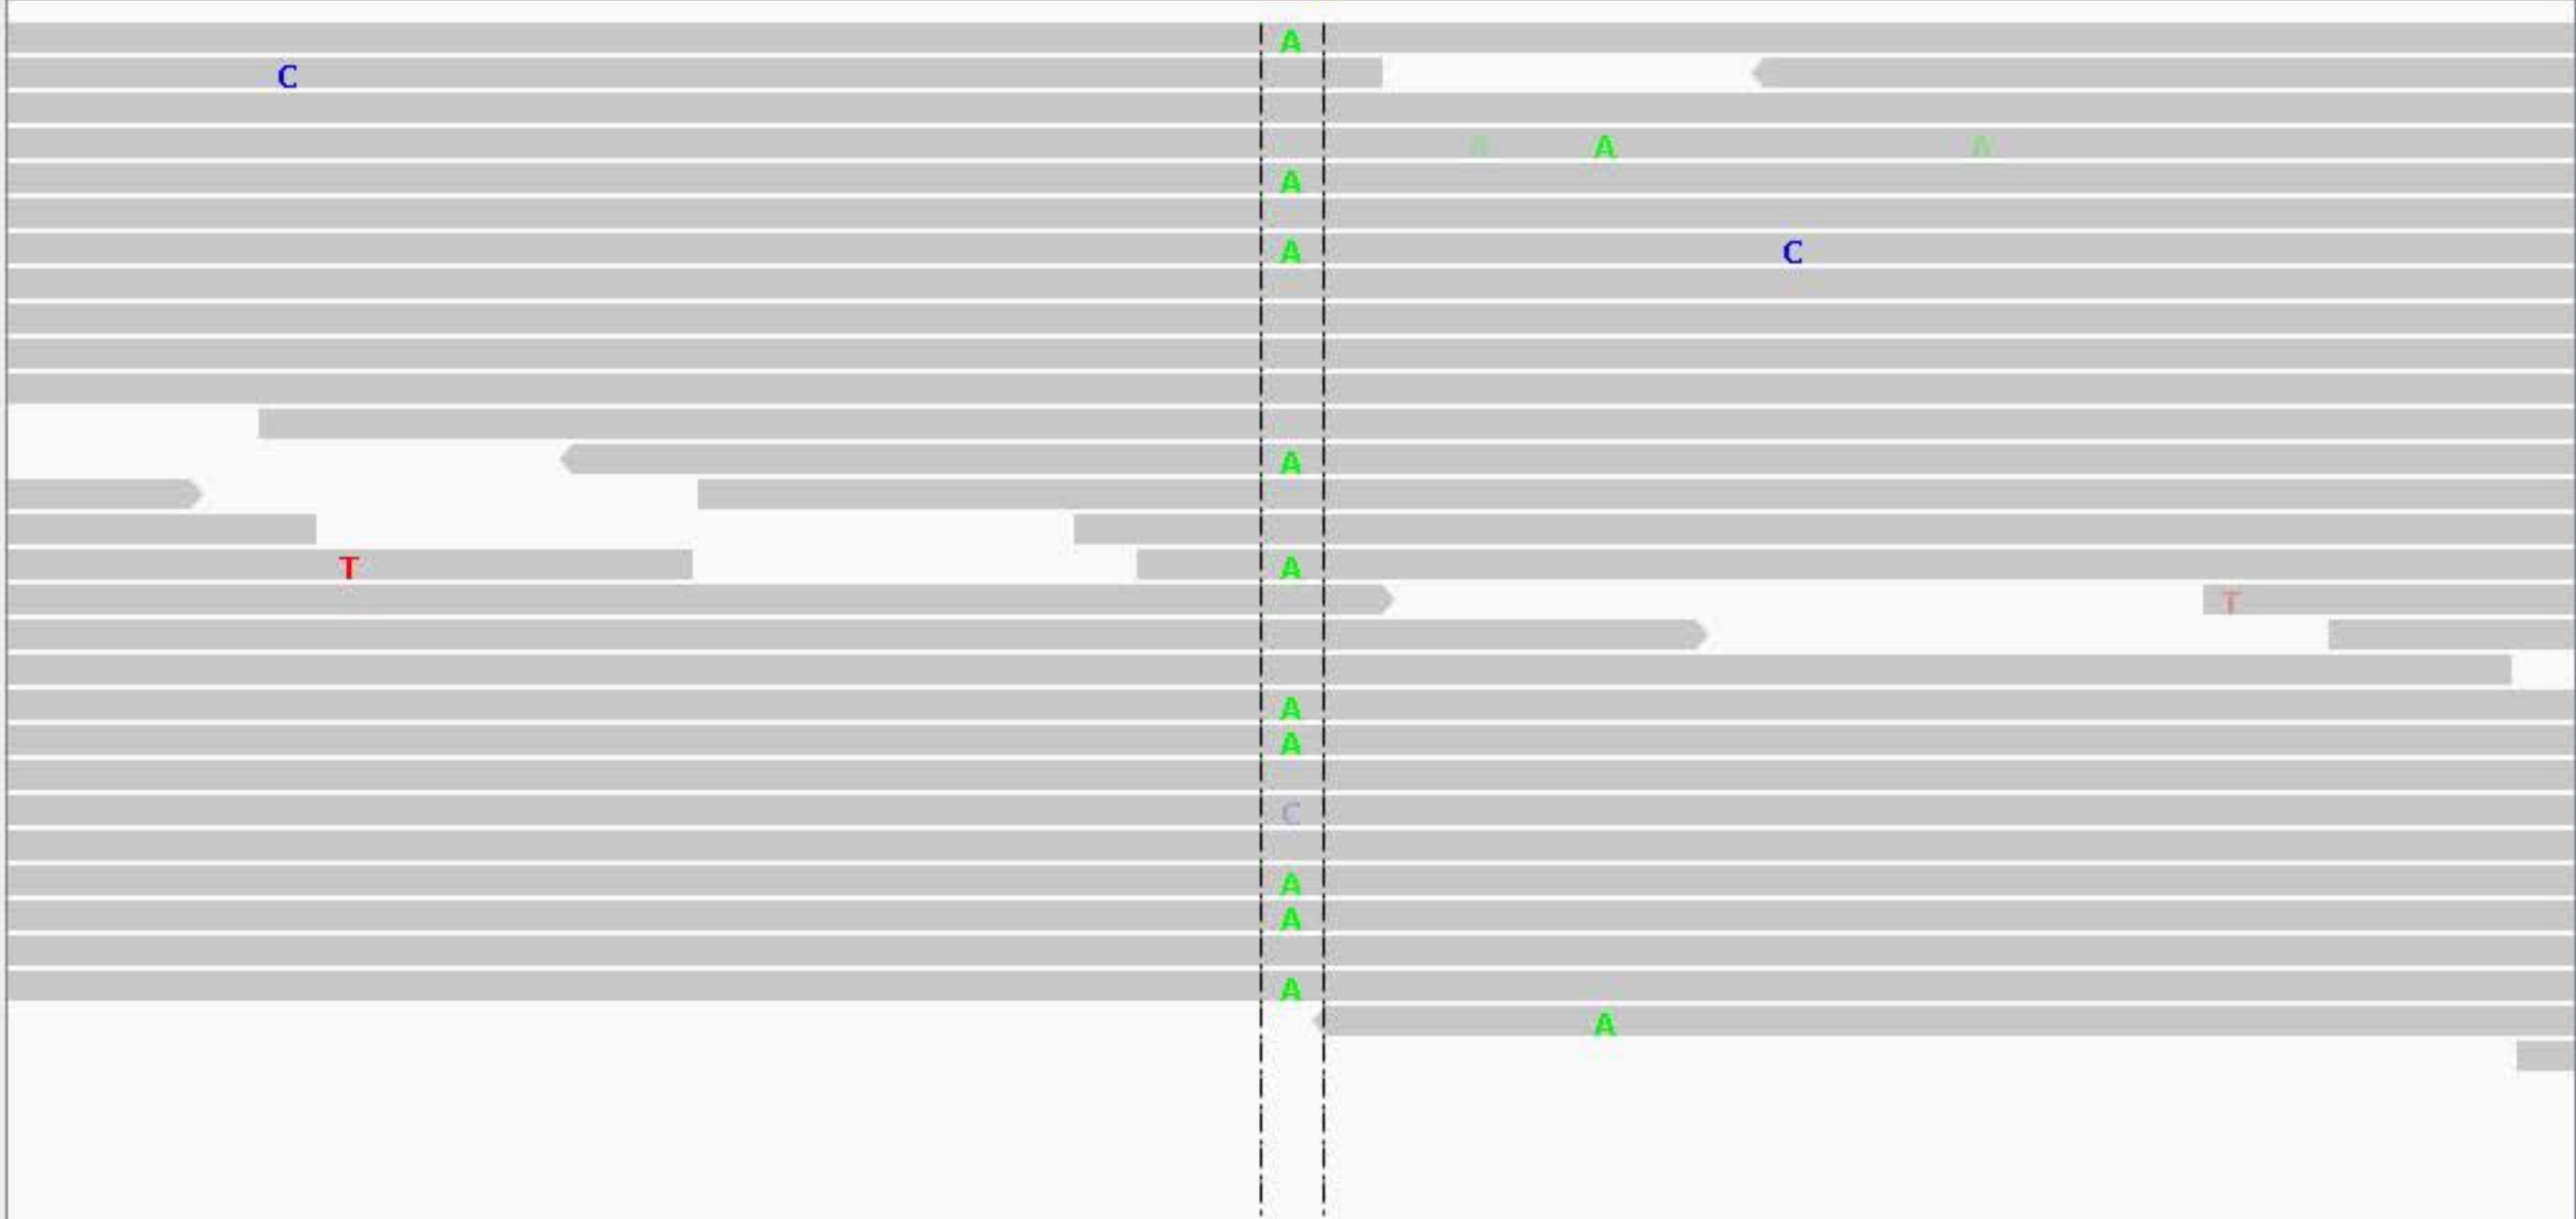

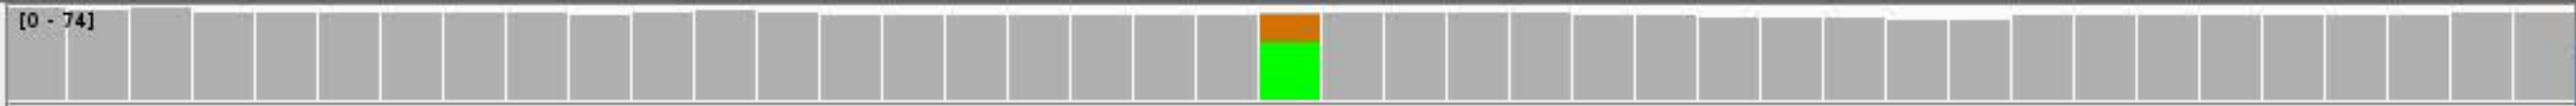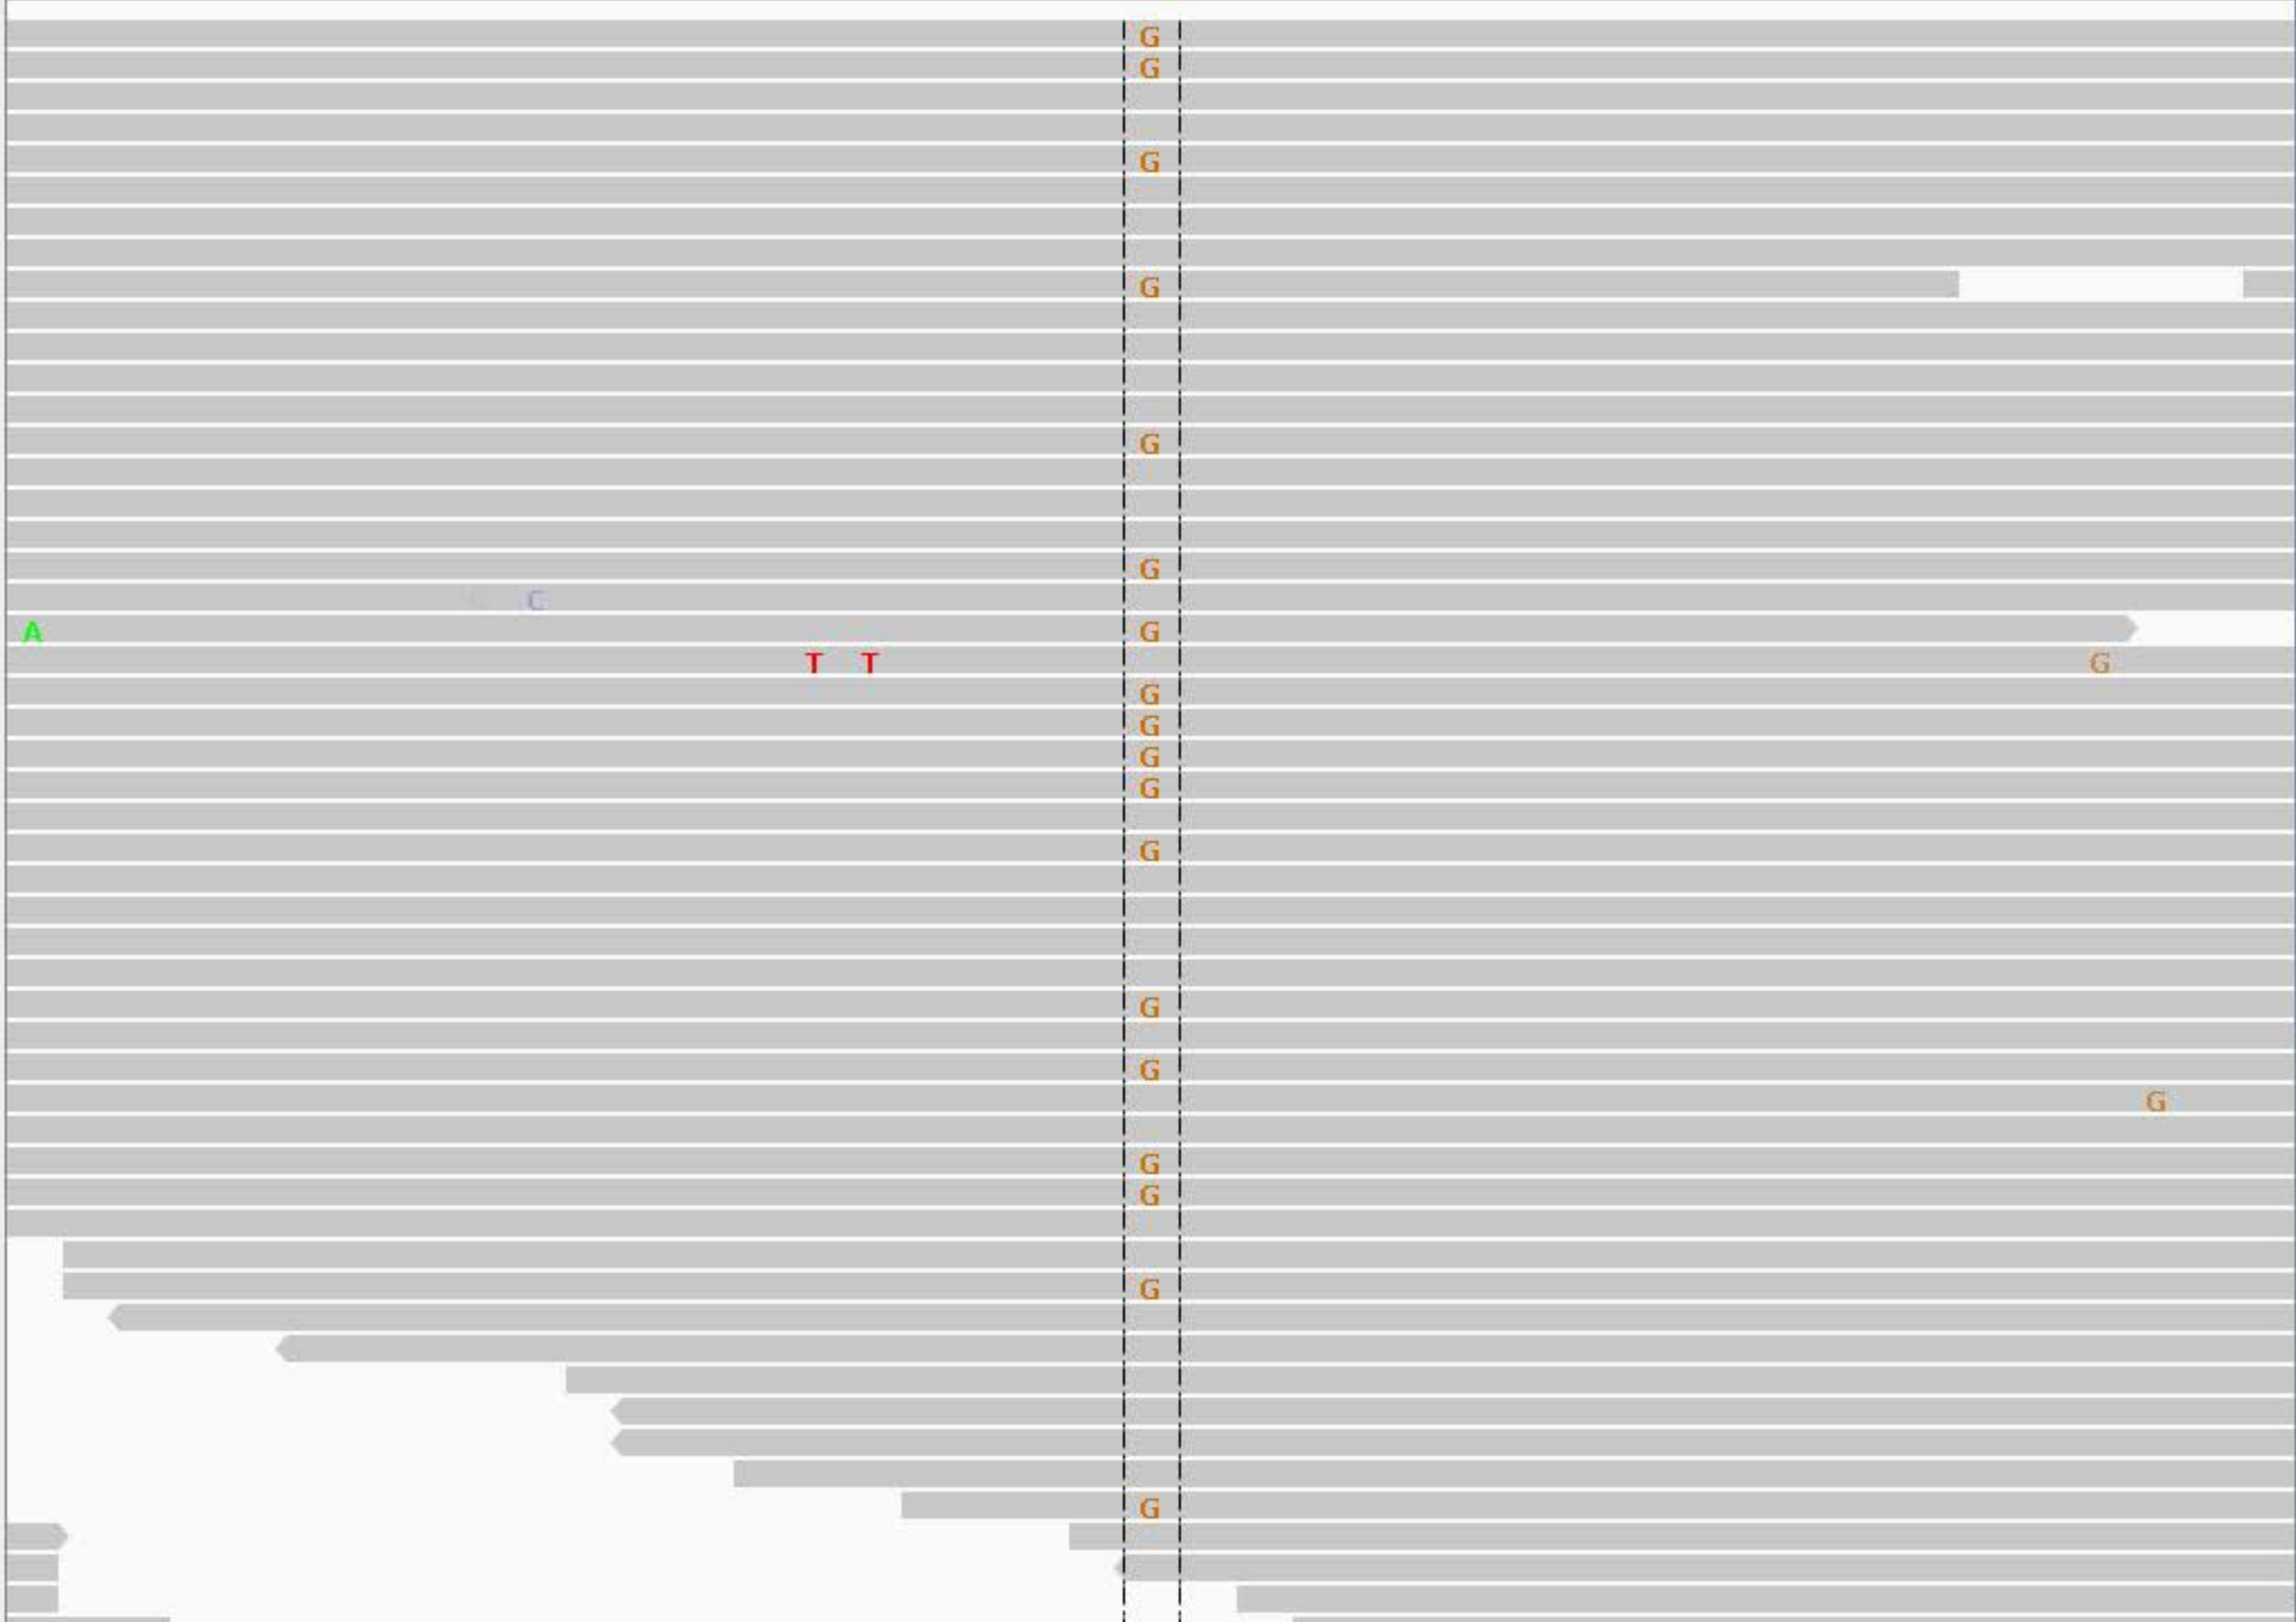

d5115b50-b8bd-4ac4-9c94-4e3  
f9b1\_21\_25677409.sam Coverage

[0 - 50]

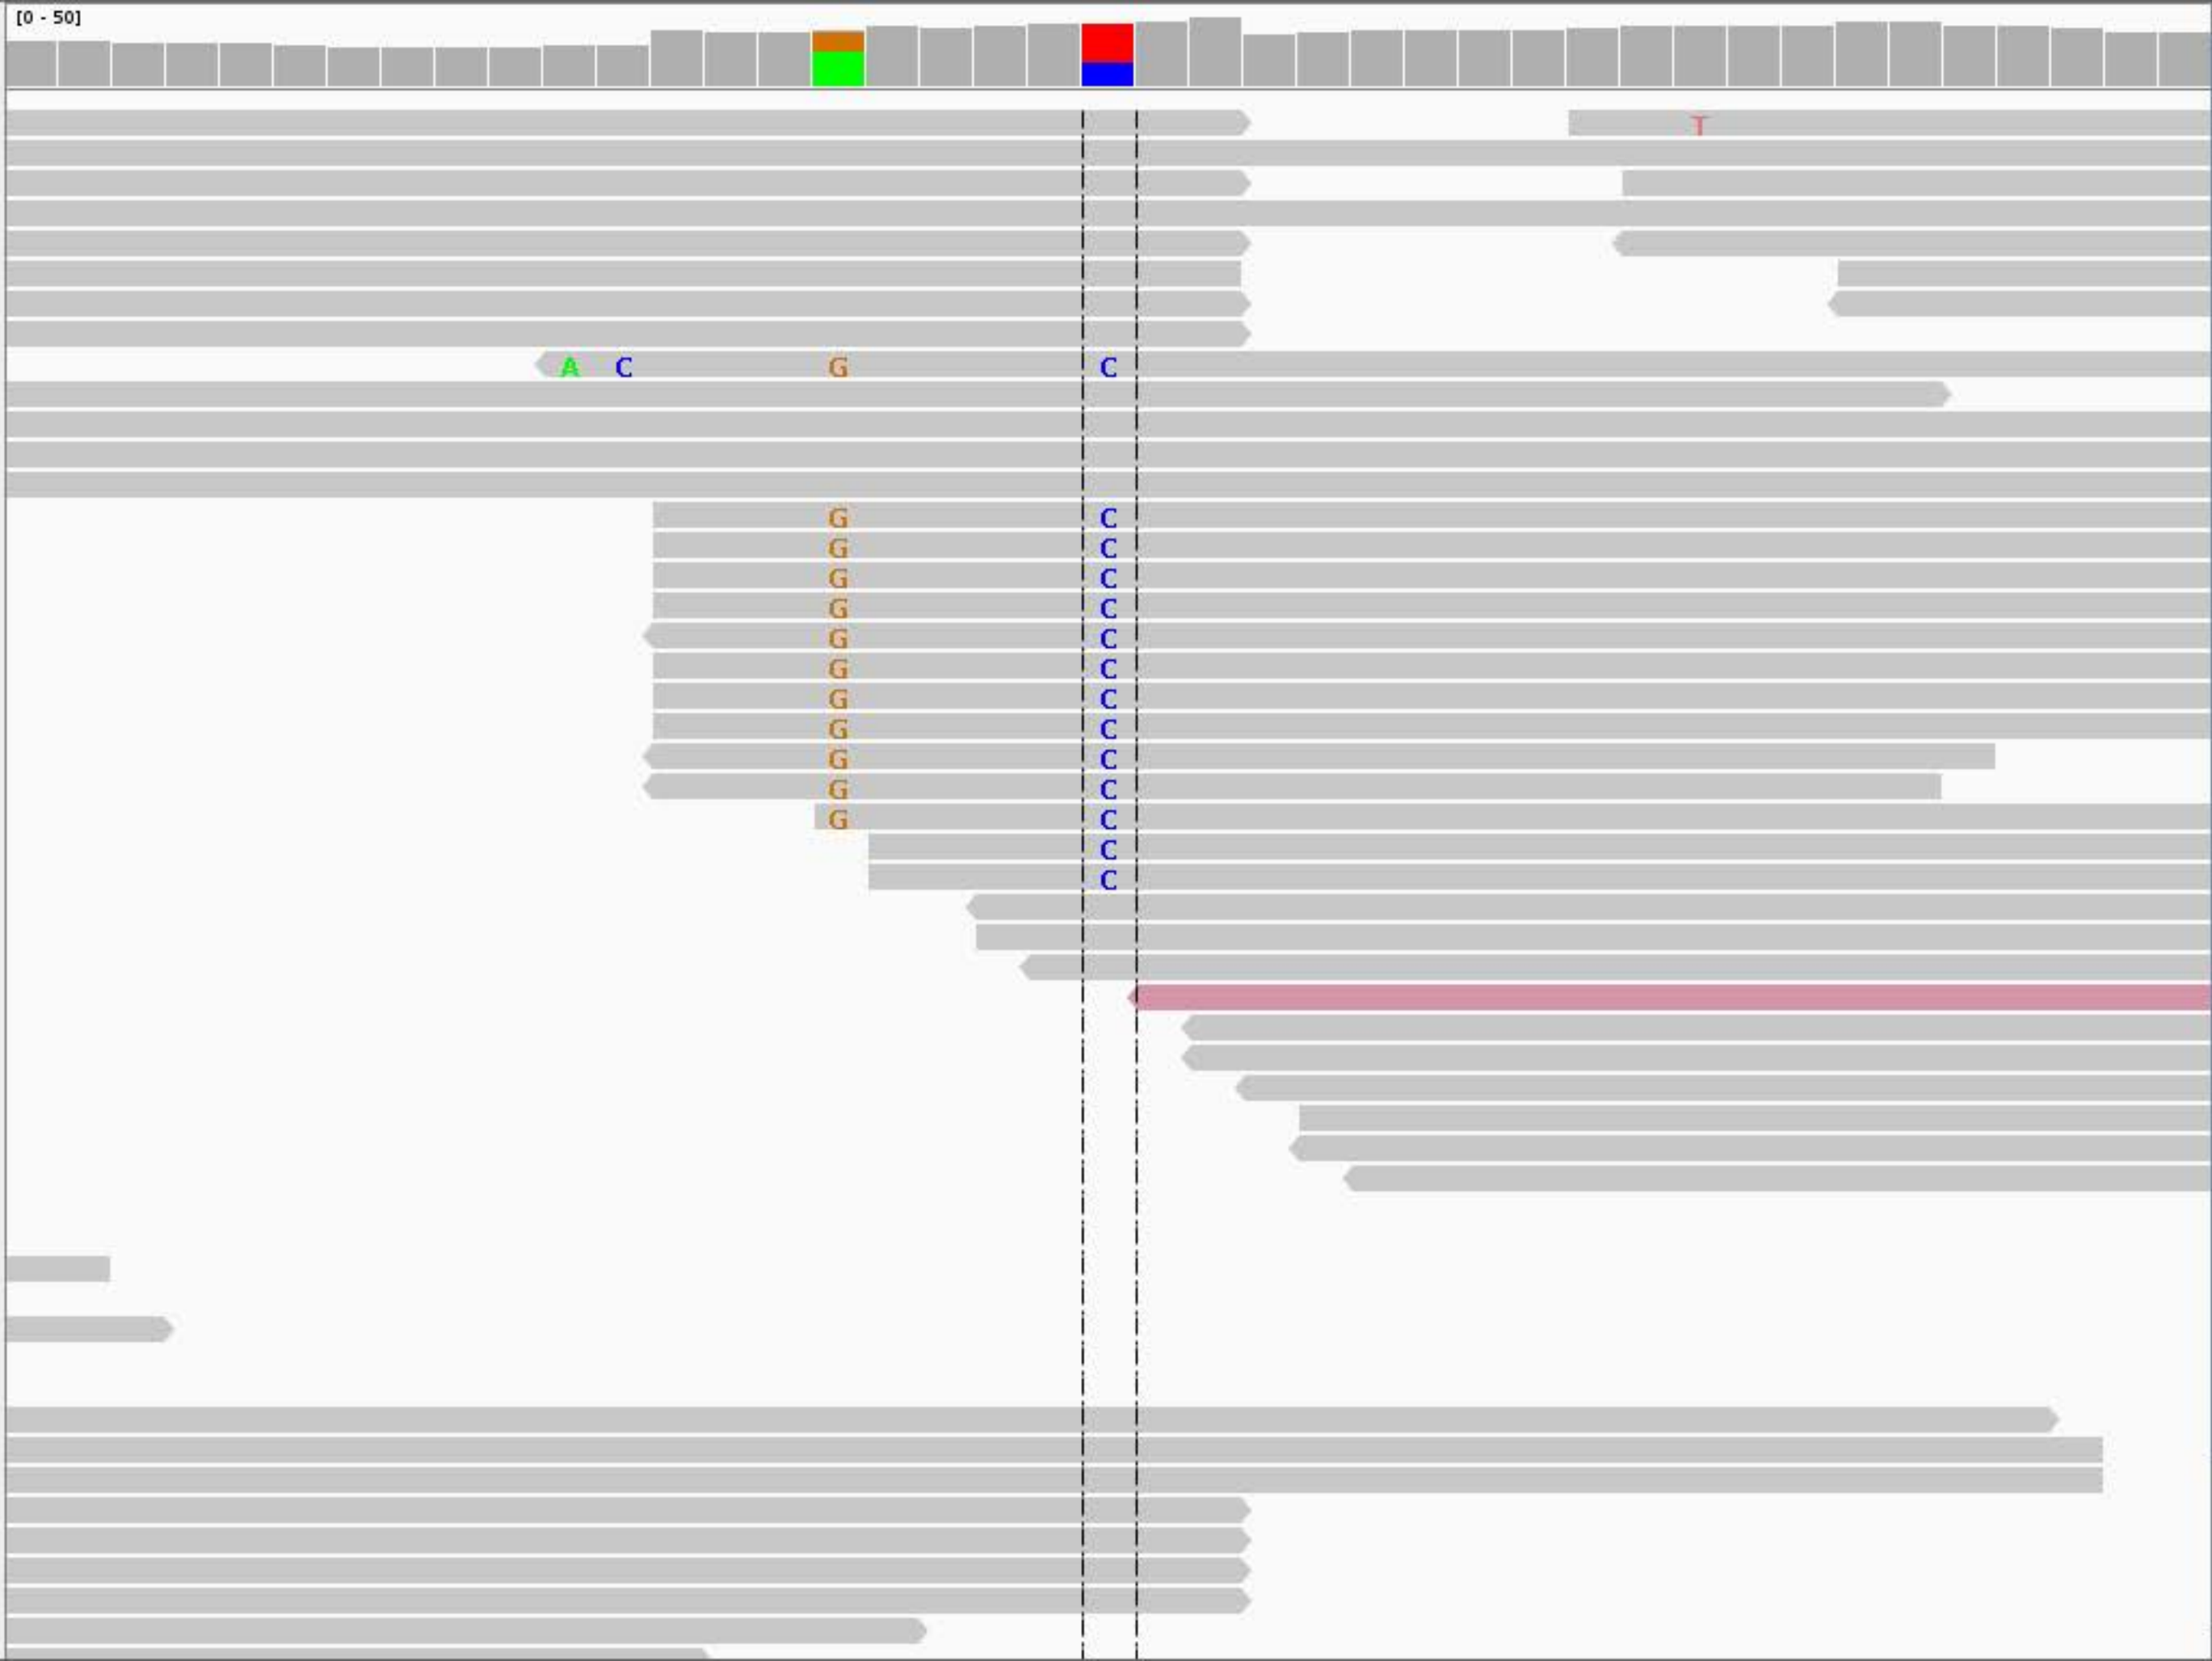

d5115b50-b8bd-4ac4-9c94-4e3  
f9b1\_21\_25677409.sam

e72c727c-557e-424d-b045-356:  
f9c6\_9\_109366501.sam Covera

[0 - 86]

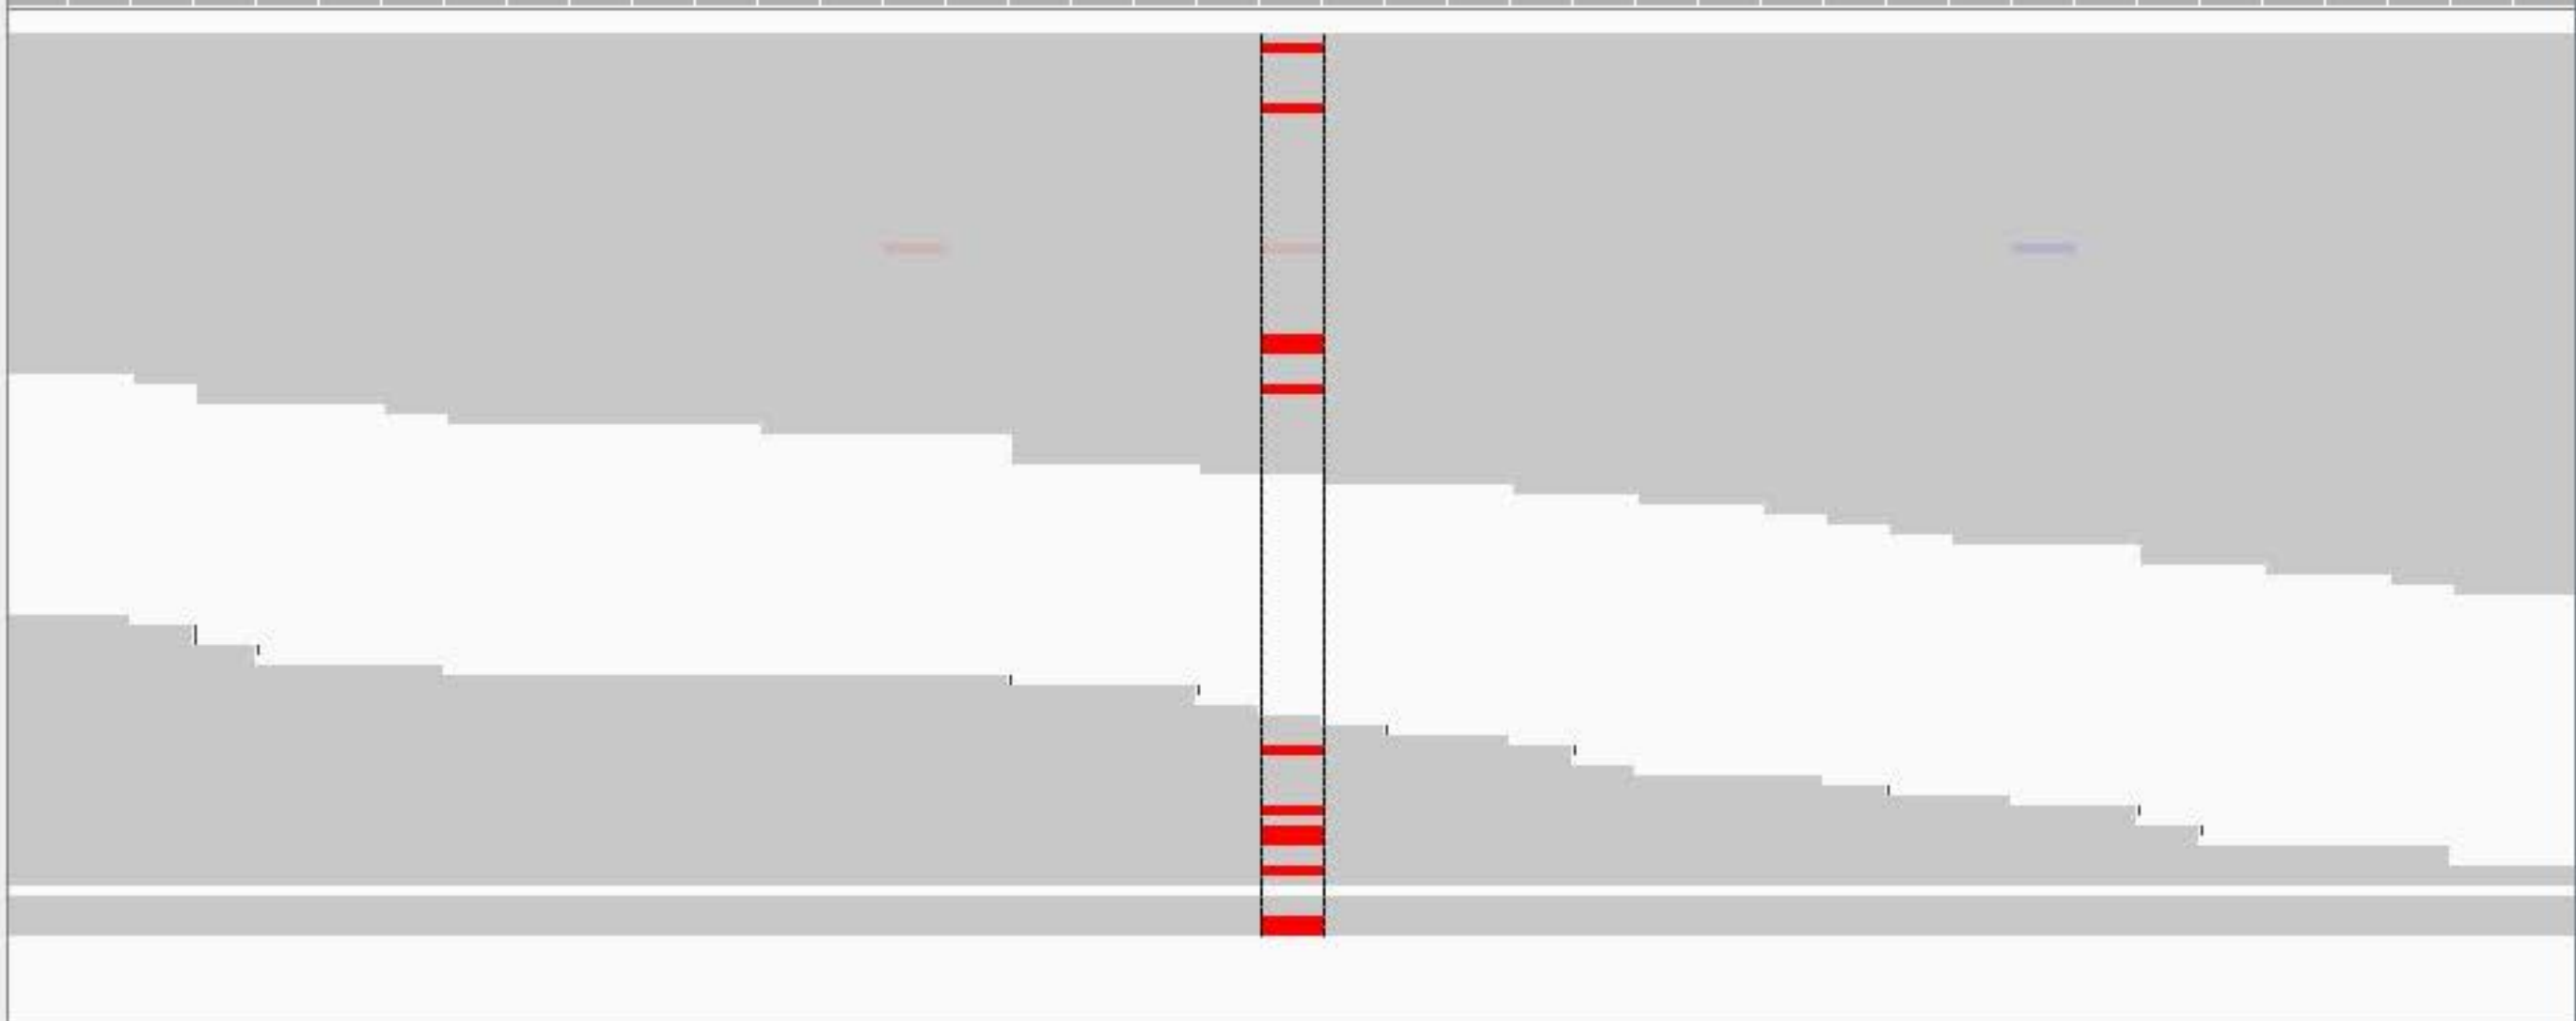

e72c727c-557e-424d-b045-356:  
f9c6\_9\_109366501.sam

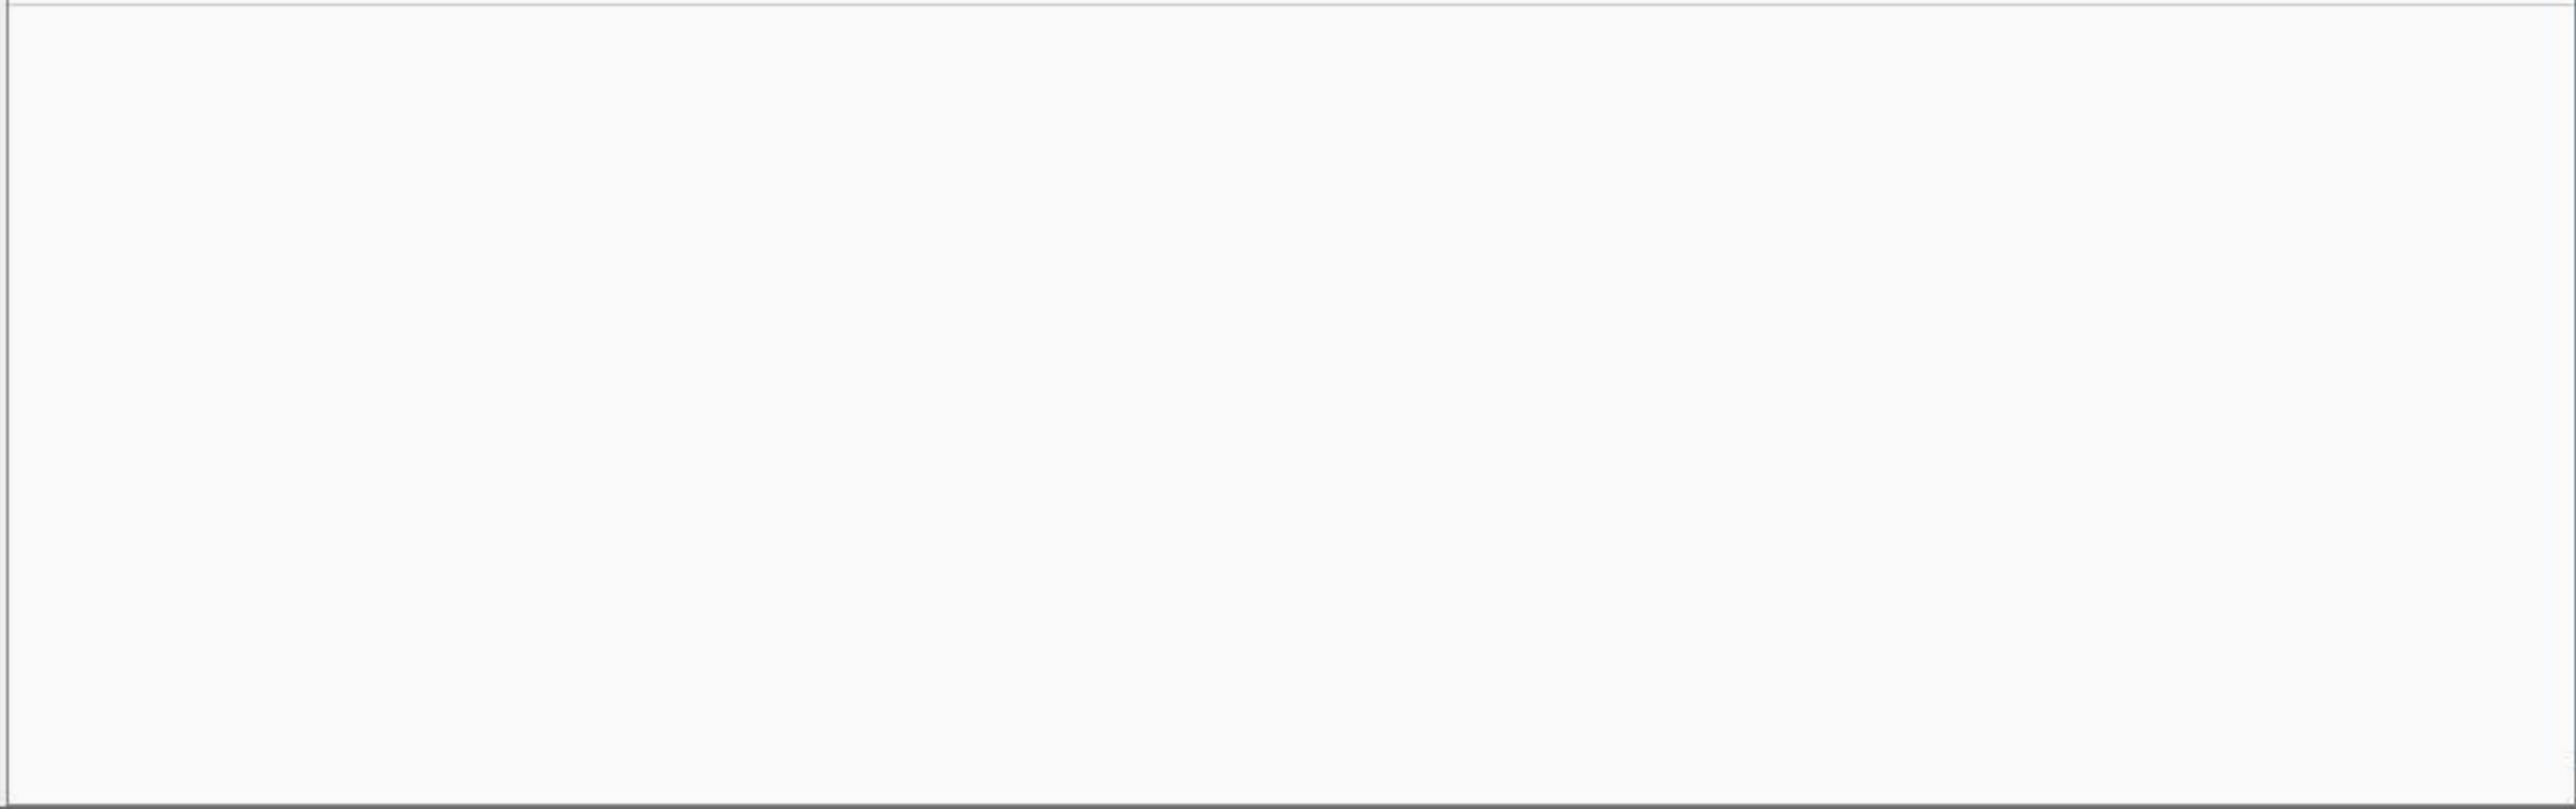

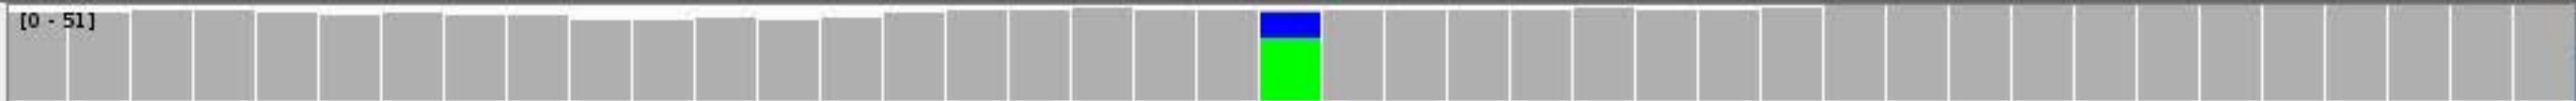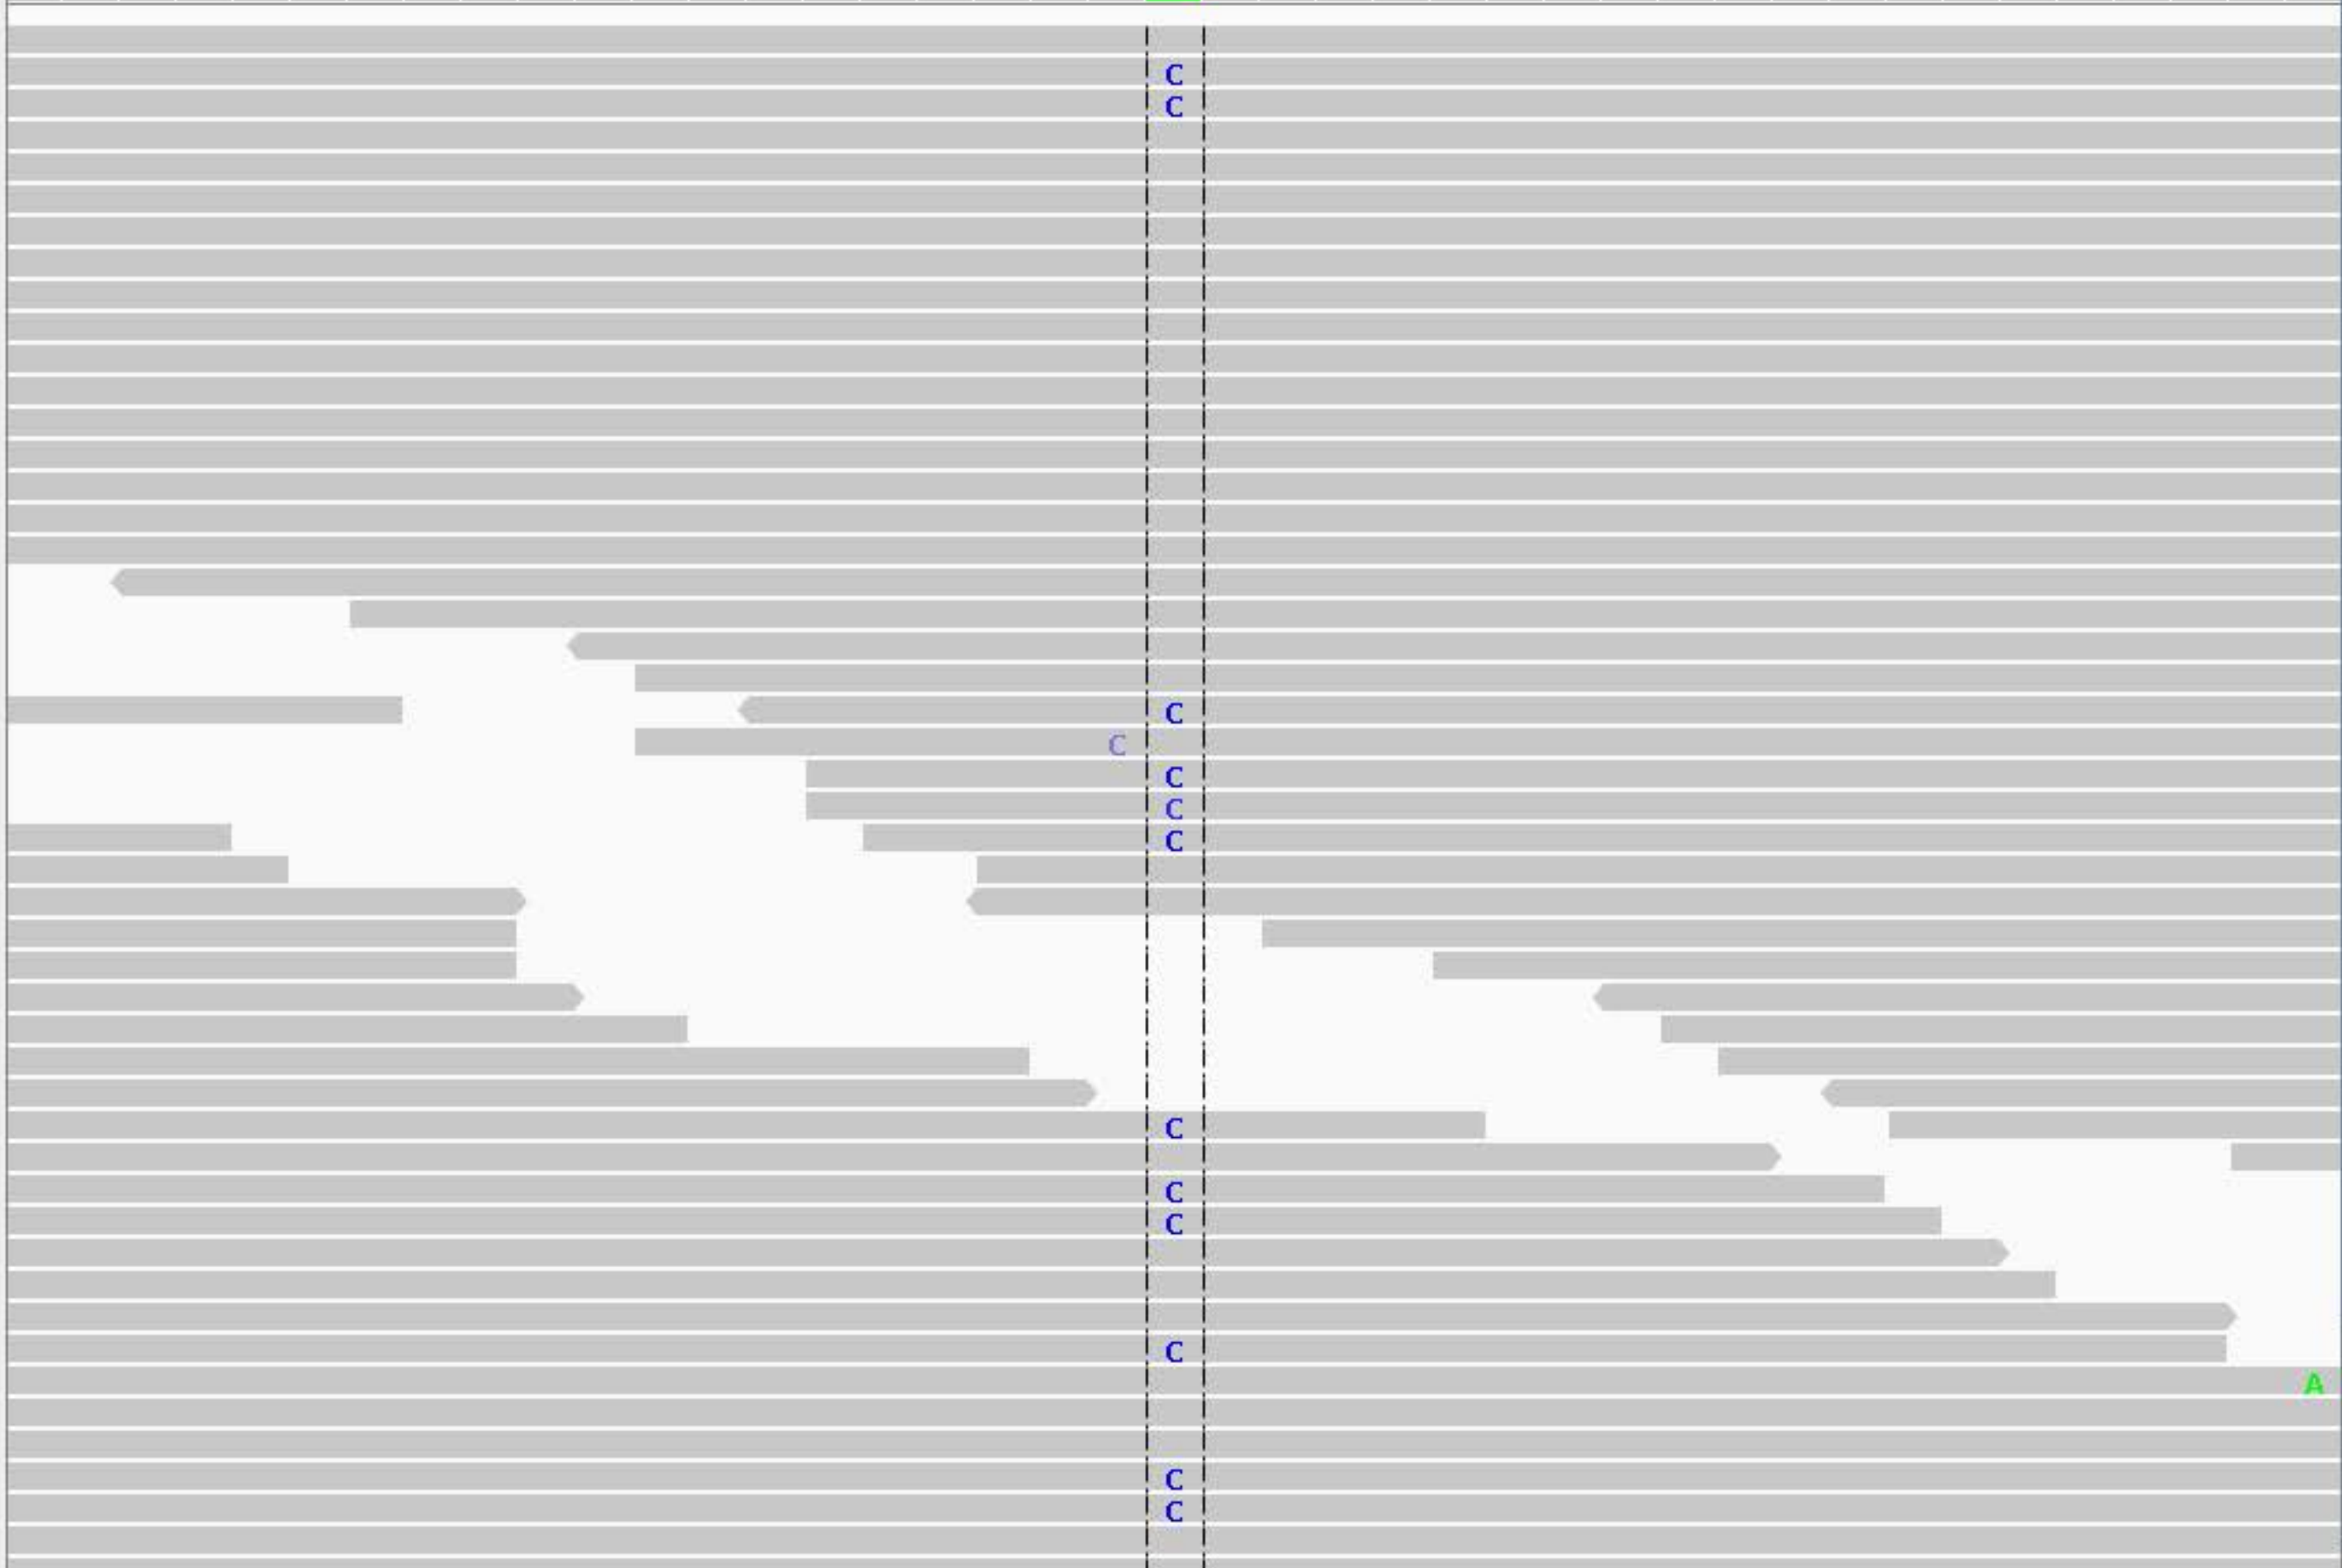

# Supplementary Figure S14

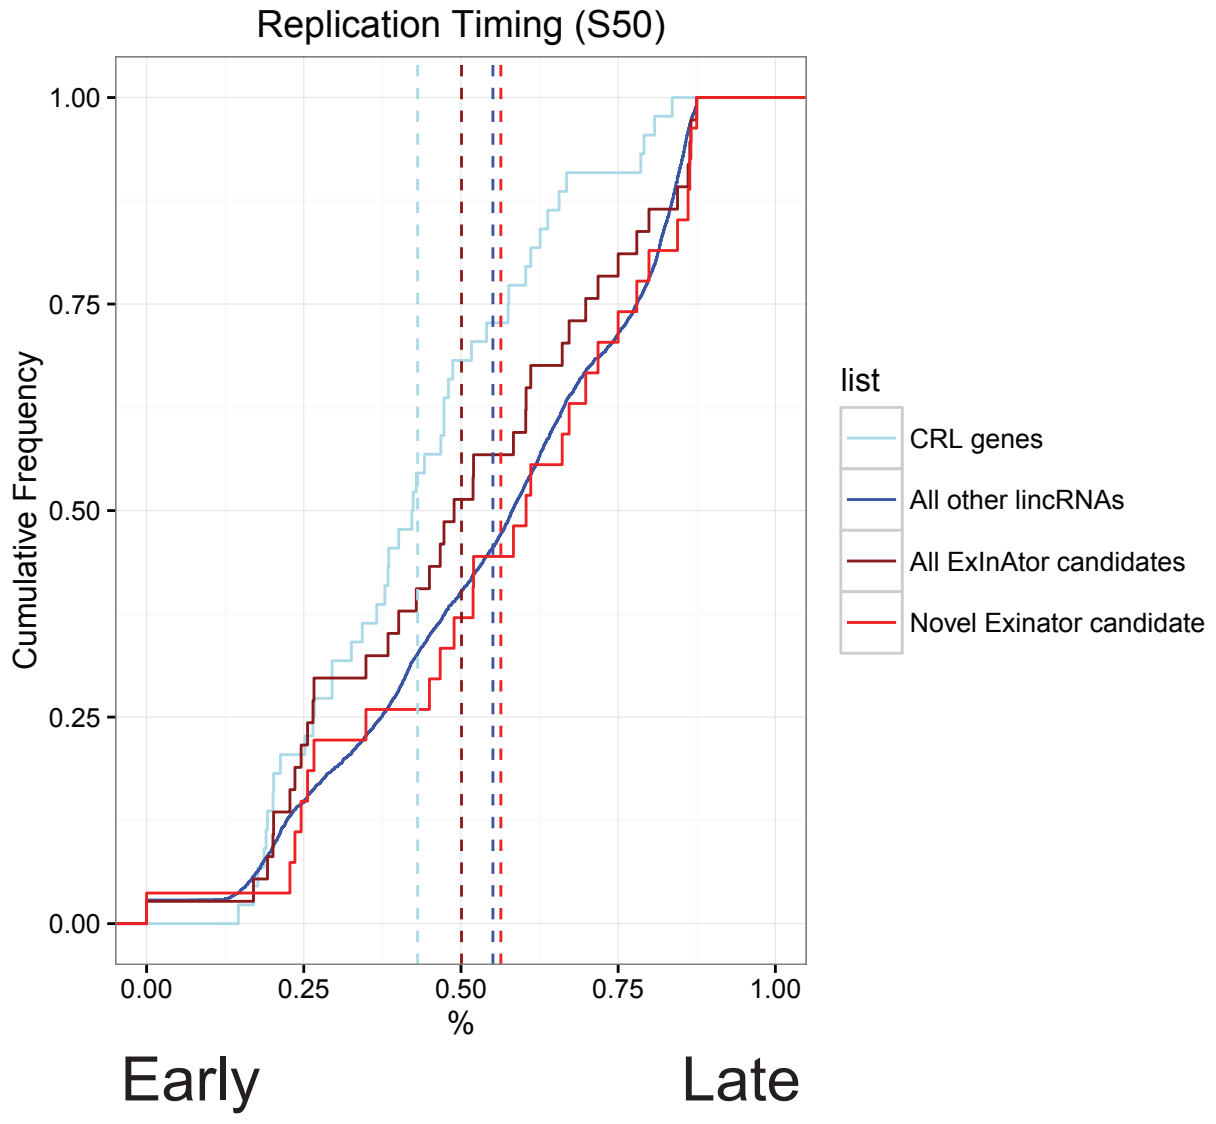

Supplement: srep41544-s1.pdf [file srep41544-s1.pdf]
